# Supplementary material for: Ependymoma Pediatric Brain Tumor Protein Fingerprinting by Integrated Mass Spectrometry Platforms: A Pilot Investigation
Source: MDPI journal article supplement (doi:10.3390/cancers12030674), 2020-03-13
Supplement: s1 [file s1]

# Supplementary Materials: Ependymoma Pediatric Brain Tumor Protein Fingerprinting by Integrated Mass Spectrometry Platforms: A Pilot Investigation

Diana Valeria Rossetti, Luca Massimi, Claudia Martelli, Federica Vincenzoni, Susanna Di Silvestre, Gianluca Scorpio, Gianpiero Tamburrini, Massimo Caldarelli, Andrea Urbani and Claudia Desiderio

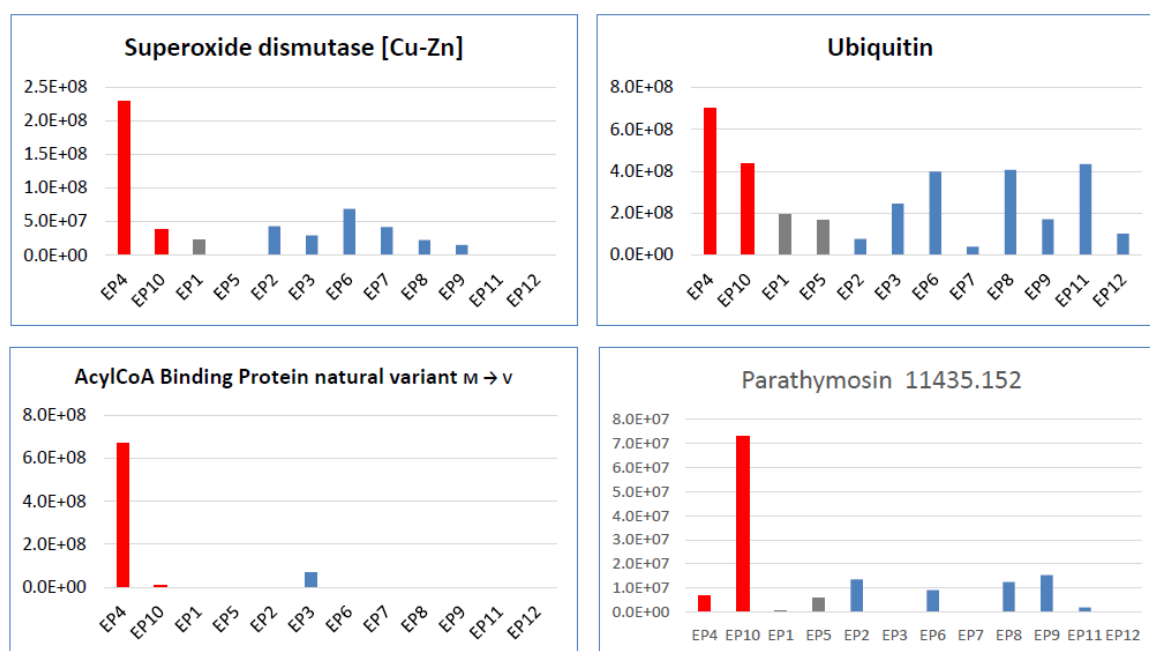

**Figure S1.** Proteins showing statistically significant higher levels in ST with respect to PF ependymomas ( $p < 0.05$ ).

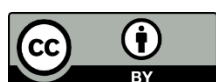

© 2020 by the authors. Licensee MDPI, Basel, Switzerland. This article is an open access article distributed under the terms and conditions of the Creative Commons Attribution (CC BY) license (<http://creativecommons.org/licenses/by/4.0/>).
