# Supplementary material for: Ependymoma Pediatric Brain Tumor Protein Fingerprinting by Integrated Mass Spectrometry Platforms: A Pilot Investigation
Source: Cancers (Basel). 2020 Mar 13;12(3):674. doi: 10.3390/cancers12030674 (PMC7140025; doi:10.3390/cancers12030674)
Supplement: Supplementary file 1 [file cancers-12-00674-s001.zip › Table S1.xlsx]

## Sheet: Top-down identification data
Name	Ion Type	Ion Number	Theoretical Mass	Observed Mass	Mass Difference (Da)	Mass Difference (ppm)
B2	B	2	156.09	156.09	-0.000146467	-0.93835
Y1	Y	1	174.112	174.112	4.85331e-05	0.278747		1463.86
Y4	Y	4	429.234	429.235	0.00114853	2.67578
Y5	Y	5	486.255	486.256	0.000688533	1.41599		P14136 (GFAP_HUMAN)
Y6	Y	6	599.339	599.34	0.000628533	1.04871		VGGLAPGRRLGPGTR		Frag. 22-36
Y7	Y	7	755.44	755.442	0.00151853	2.01013
Y10	Y	10	1065.62	1065.62	0.00118853	1.11535
Y12	Y	12	1249.74	1249.74	0.00201853	1.61517
Y13	Y	13	1306.76	1306.76	0.00255853	1.95792
Y14	Y	14	1363.78	1363.78	0.00309853	2.27202
Name	Ion Type	Ion Number	Theoretical Mass	Observed Mass	Mass Difference (Da)	Mass Difference (ppm)
B6	B	6	715.285	715.286	0.00103853	1.45192		1566.7
B7	B	7	786.322	786.322	-7.14669e-05	-0.0908876
B8	B	8	915.364	915.365	0.000338533	0.369834		TYB4_HUMAN (P62328)
Y2	Y	2	280.106	280.106	-0.000191467	-0.683552		SDKPDMAEIEKFD		Frag. 2-14
Y3	Y	3	408.201	408.201	-0.000151467	-0.37106
Y4	Y	4	537.243	537.243	-0.000741467	-1.38013
Y8	Y	8	981.448	981.445	-0.00299147	-3.04801
Y10	Y	10	1193.53	1193.53	-0.00169147	-1.4172
Name	Ion Type	Ion Number	Theoretical Mass	Observed Mass	Mass Difference (Da)	Mass Difference (ppm)
B3	B	3	328.15	328.15	0.000213533	0.650719
B4	B	4	457.192	457.193	0.000623533	1.36383		2028.02
B5	B	5	556.261	556.262	0.00121353	2.18159
B6	B	6	669.345	669.346	0.00115353	1.72338		P14136 (GFAP_HUMAN)
B7	B	7	797.44	797.441	0.00119353	1.49671		Frag. 416 –432
B8	B	8	926.482	926.484	0.00160353	1.73078
B9	B	9	1013.51	1013.51	0.000573533	0.565886
B11	B	11	1269.67	1269.67	0.00303353	2.38923
B12	B	12	1398.71	1398.71	0.00244353	1.74699
B13	B	13	1535.77	1535.77	0.00253353	1.64968
B15	B	15	1778.89	1778.89	0.00163353	0.918287
Y1	Y	1	149.051	149.052	0.000668533	4.48526
Y4	Y	4	491.241	491.242	0.000358533	0.729851
Y5	Y	5	628.3	628.301	0.000448533	0.713883
Y11	Y	11	1357.67	1357.67	0.00273853	2.01709
Name	Ion Type	Ion Number	Theoretical Mass	Observed Mass	Mass Difference (Da)	Mass Difference (ppm)
B5	B	5	627.334	627.335	0.000703533	1.12146
B6	B	6	714.366	714.367	0.000673533	0.94284		2028.08
B8	B	8	942.477	942.478	0.000673533	0.714641
B9	B	9	1043.52	1043.52	-6.46688e-06	-0.00619715		P14136 (GFAP_HUMAN)
B11	B	11	1258.65	1258.64	-0.00699647	-5.5587		Frag. 388 –405
Y1	Y	1	146.106	146.106	0.000198533	1.35883
Y2	Y	2	259.19	259.19	0.000138533	0.534486
Y4	Y	4	453.27	453.271	0.000768533	1.69553
Y5	Y	5	582.313	582.313	0.000178533	0.306593
Y6	Y	6	669.345	669.345	0.000148533	0.221908
Y7	Y	7	768.413	768.414	0.000738533	0.961115
Y8	Y	8	855.445	855.446	0.000708533	0.828263
Y9	Y	9	983.54	983.541	0.000748533	0.76106
Y10	Y	10	1084.59	1084.59	0.00206853	1.90721
Y11	Y	11	1199.61	1199.62	0.00112853	0.940746
Y12	Y	12	1312.7	1312.7	-0.00193147	-1.47137
Name	Ion Type	Ion Number	Theoretical Mass	Observed Mass	Mass Difference (Da)	Mass Difference (ppm)
B3	B	3	398.228	398.228	-2.64669e-05	-0.0664617
B4	B	4	527.27	527.271	0.000383533	0.727394
B6	B	6	715.35	715.35	-0.000326467	-0.456374
B8	B	8	943.461	943.461	-0.000326467	-0.346031
Y1	Y	1	146.106	146.106	0.000198533	1.35883		2029.06		18 min
Y2	Y	2	259.19	259.19	0.000138533	0.534486
Y3	Y	3	396.248	396.249	0.000228533	0.576742		P14136 (GFAP_HUMAN)
Y4	Y	4	453.27	453.27	-0.000231467	-0.51066		Frag. 388 –405
Y5	Y	5	582.313	582.313	0.000178533	0.306593		(QIR) ETSLDTKSVSEGHLK
Y6	Y	6	669.345	669.345	0.000148533	0.221908
Y7	Y	7	768.413	768.413	-0.000261467	-0.340269
Y8	Y	8	855.445	855.445	-0.000291467	-0.34072
Y9	Y	9	983.54	983.54	-0.000251467	-0.255675
Y10	Y	10	1084.59	1084.59	0.00206853	1.90721
Y11	Y	11	1199.61	1199.61	0.000128533	0.107145
Y12	Y	12	1312.7	1312.7	-0.00193147	-1.47137
Name	Ion Type	Ion Number	Theoretical Mass	Observed Mass	Mass Difference (Da)	Mass Difference (ppm)
B3	B	3	372.164	372.165	0.000228533	0.614065
B5	B	5	584.244	584.244	-0.000471467	-0.806969
B6	B	6	715.285	715.285	3.85331e-05	0.053871		2151.1
B7	B	7	786.322	786.321	-0.00107147	-1.36263
Y1	Y	1	146.106	146.106	0.000198533	1.35883		TYB4_HUMAN (P62328)
Y2	Y	2	259.19	259.19	0.000138533	0.534486		Frag. 2-19
Y4	Y	4	474.317	474.317	0.000148533	0.313152
Y5	Y	5	602.412	602.412	0.000188533	0.312964
Y6	Y	6	717.438	717.439	0.000248533	0.346417
Y7	Y	7	864.507	864.507	-0.000161467	-0.186773
Y8	Y	8	992.602	992.604	0.00187853	1.89253
Y9	Y	9	1121.64	1121.64	-0.00171147	-1.52586
Y10	Y	10	1234.73	1234.73	-0.000771467	-0.624807
Y11	Y	11	1363.77	1363.77	0.00163853	1.20147
Y14	Y	14	1680.88	1680.87	-0.000901467	-0.536308
Name	Ion Type	Ion Number	Theoretical Mass	Observed Mass	Mass Difference (Da)	Mass Difference (ppm)
B2	B	2	186.1	186.101	0.000283533	1.52355
B18	B	18	1754.89	1754.89	-0.00423647	-2.41409
Y1	Y	1	174.112	174.112	4.85331e-05	0.278747		2185.14
Y6	Y	6	599.339	599.34	0.000628533	1.04871
Y7	Y	7	755.44	755.44	-0.000481467	-0.637333		P14136 (GFAP_HUMAN)
Y10	Y	10	1065.62	1065.62	0.00118853	1.11535		Frag. 15-36
Y11	Y	11	1136.65	1136.65	-0.000921467	-0.810685
Y12	Y	12	1249.74	1249.74	1.85331e-05	0.0148296
Y13	Y	13	1306.76	1306.75	-0.00644147	-4.92935
Y14	Y	14	1363.78	1363.78	0.00109853	0.805506
Y15	Y	15	1462.85	1462.85	0.000688533	0.47068
Y16	Y	16	1593.89	1593.89	0.00119853	0.751955
Y17	Y	17	1724.93	1724.93	0.000708533	0.410761
Y18	Y	18	1853.97	1853.97	0.00111853	0.603317
Y19	Y	19	1910.99	1911	0.00265853	1.39118
Y20	Y	20	1998.03	1998.03	0.000628533	0.314577
Y21	Y	21	2085.06	2085.06	0.00159853	0.766662
Name	Ion Type	Ion Number	Theoretical Mass	Observed Mass	Mass Difference (Da)	Mass Difference (ppm)
B2	B	2	241.179	241.179	-0.000296467	-1.22924
B2	B	2	241.179	241.18	0.000703533	2.91706
B3	B	3	342.227	342.227	2.35331e-05	0.0687647
B3	B	3	342.227	342.228	0.00102353	2.9908
B8	B	8	942.513	942.511	-0.00270647	-2.87154
B8	B	8	942.513	942.515	0.00129353	1.37243		2664.29
B9	B	9	999.535	999.535	-0.000166467	-0.166544
B9	B	9	999.535	999.535	-0.000166467	-0.166544		P08670 (VIME_HUMAN)
B9	B	9	999.535	999.537	0.00183353	1.83439		Frag. 444-466
B10	B	10	1127.59	1127.59	-0.000746467	-0.662
B10	B	10	1127.59	1127.59	0.00125353	1.11169
B10	B	10	1127.59	1127.59	0.00125353	1.11169
B10	B	10	1127.59	1127.59	0.00125353	1.11169
B11	B	11	1226.66	1226.66	-0.000156467	-0.127555
B11	B	11	1226.66	1226.66	0.000843533	0.687666
B11	B	11	1226.66	1226.66	0.00184353	1.50289
B11	B	11	1226.66	1226.66	0.00184353	1.50289
Y1	Y	1	147.053	147.054	0.000568533	3.86617
Y2	Y	2	260.137	260.138	0.000508533	1.95486
Y5	Y	5	627.25	627.25	-0.000281467	-0.448732
Y5	Y	5	627.25	627.251	0.000718533	1.14553
Y5	Y	5	627.25	627.251	0.000718533	1.14553
Y6	Y	6	764.309	764.309	-0.000191467	-0.25051
Y6	Y	6	764.309	764.31	0.000808533	1.05786
Y6	Y	6	764.309	764.31	0.000808533	1.05786
Y6	Y	6	764.309	764.31	0.000808533	1.05786
Y8	Y	8	979.4	979.4	0.000198533	0.202709
Y8	Y	8	979.4	979.4	0.000198533	0.202709
Y8	Y	8	979.4	979.401	0.00119853	1.22374
Y9	Y	9	1080.45	1080.45	0.000518533	0.479925
Y9	Y	9	1080.45	1080.45	0.00151853	1.40547
Y10	Y	10	1209.49	1209.49	0.000928533	0.767706
Y10	Y	10	1209.49	1209.49	0.00192853	1.5945
Y11	Y	11	1323.53	1323.53	-0.00200147	-1.51222
Y11	Y	11	1323.53	1323.53	0.000998533	0.754445
Y11	Y	11	1323.53	1323.53	0.00199853	1.51
Y11	Y	11	1323.53	1323.54	0.00299853	2.26555
Y12	Y	12	1436.62	1436.61	-0.00206147	-1.43495
Y12	Y	12	1436.62	1436.62	-0.00106147	-0.738866
Y12	Y	12	1436.62	1436.62	0.000938533	0.653294
Y20	Y	20	2321.05	2321.05	-0.00624147	-2.68907
Y21	Y	21	2422.1	2422.1	-0.000921467	-0.380441
Name	Ion Type	Ion Number	Theoretical Mass	Observed Mass	Mass Difference (Da)	Mass Difference (ppm)
B2	B	2	241.179	241.18	0.000703533	2.91706		2665.28	DEAMIDATION
B3	B	3	342.227	342.227	2.35331e-05	0.0687647		Frag. 444-466
B9	B	9	999.535	999.536	0.000833533	0.833921		P08670 (VIME_HUMAN)
B10	B	10	1127.59	1127.59	0.00125353	1.11169		IKTVETRDGQVINETSQHH DDLE
B11	B	11	1226.66	1226.66	0.000843533	0.687666
Y1	Y	1	147.053	147.054	0.000568533	3.86617
Y2	Y	2	260.137	260.138	0.000508533	1.95486
Y5	Y	5	627.25	627.251	0.000718533	1.14553
Y6	Y	6	764.309	764.309	-0.000191467	-0.25051
Y11	Y	11	1324.52	1324.52	0.000982533	0.741805
Name	Ion Type	Ion Number	Theoretical Mass	Observed Mass	Mass Difference (Da)	Mass Difference (ppm)
B2	B	2	241.179	241.179	-0.000296467	-1.22924
B3	B	3	342.227	342.227	2.35331e-05	0.0687647		2665.27
B4	B	4	441.295	441.296	0.000613533	1.3903		Frag. 444-466
B5	B	5	570.338	570.338	2.35331e-05	0.0412617		P08670 (VIME_HUMAN)
B9	B	9	1000.52	1000.52	0.000833533	0.833101		IKTVETRDGQVINETSQHH DDLE
Y2	Y	2	260.137	260.137	-0.000491467	-1.88926
Y5	Y	5	627.25	627.25	-0.000281467	-0.448732
Y6	Y	6	764.309	764.309	-0.000191467	-0.25051
Y8	Y	8	979.4	979.4	0.000198533	0.202709
Y9	Y	9	1080.45	1080.45	-0.00148147	-1.37116
Y10	Y	10	1209.49	1209.49	-0.00107147	-0.885883
Y11	Y	11	1323.53	1323.53	-0.00100147	-0.756662
Y12	Y	12	1436.62	1436.62	0.000938533	0.653294
Y13	Y	13	1535.69	1535.7	0.0135285	8.80944
Name	Ion Type	Ion Number	Theoretical Mass	Observed Mass	Mass Difference (Da)	Mass Difference (ppm)
B2	B	2	226.168	226.169	0.000603533	2.66852
B4	B	4	455.311	455.312	0.000963533	2.11621
B4	B	4	455.311	455.312	0.000963533	2.11621
B11	B	11	1240.68	1240.68	0.00119353	0.962001
B11	B	11	1240.68	1240.68	0.00119353	0.962001		2777.37
B12	B	12	1339.75	1339.75	0.000783533	0.584837		Frag. 443-466
Y1	Y	1	147.053	147.054	0.000568533	3.86617		P08670 (VIME_HUMAN)
Y5	Y	5	627.25	627.25	-0.000281467	-0.448732
Y5	Y	5	627.25	627.251	0.000718533	1.14553
Y6	Y	6	764.309	764.31	0.000808533	1.05786
Y6	Y	6	764.309	764.31	0.000808533	1.05786
Y9	Y	9	1080.45	1080.45	0.00251853	2.33101
Y10	Y	10	1209.49	1209.49	-0.00307147	-2.53947
Y11	Y	11	1323.53	1323.53	0.00199853	1.51
Y11	Y	11	1323.53	1323.54	0.00299853	2.26555
Y12	Y	12	1436.62	1436.61	-0.00506147	-3.52319
Y21	Y	21	2422.1	2422.12	0.0160785	6.63826
Name	Ion Type	Ion Number	Theoretical Mass	Observed Mass	Mass Difference (Da)	Mass Difference (ppm)
B2	B	2	226.168	226.169	0.000603533	2.66852
B4	B	4	455.311	455.312	0.000963533	2.11621
B11	B	11	1240.68	1240.68	0.000193533	0.15599
B12	B	12	1339.75	1339.75	0.000783533	0.584837		2778.37	DEAMIDATION
B14	B	14	1567.86	1567.86	0.00777753	4.96061		Frag. 443-466
Y1	Y	1	147.053	147.054	0.000568533	3.86617		LIKTVETRDGQVINETSQHH DDLE
Y6	Y	6	764.309	764.309	-0.000191467	-0.25051
Y8	Y	8	979.4	979.401	0.00119853	1.22374		Rt 19.3 min
Y10	Y	10	1209.49	1209.49	-0.00207147	-1.71268
Y11	Y	11	1324.52	1324.52	0.00198253	1.4968
Y21	Y	21	2423.08	2423.11	0.0220625	9.10515
Name	Ion Type	Ion Number	Theoretical Mass	Observed Mass	Mass Difference (Da)	Mass Difference (ppm)
B2	B	2	226.168	226.169	0.000603533	2.66852
B4	B	4	455.311	455.312	0.000963533	2.11621
B5	B	5	554.379	554.38	0.000553533	0.998474
B6	B	6	683.422	683.422	-3.64669e-05	-0.0533593
B7	B	7	784.469	784.473	0.00328353	4.18567
B11	B	11	1241.66	1241.66	0.00117753	0.948353		2778.36	R CITR or DEAMIDATION
Y5	Y	5	627.25	627.25	-0.000281467	-0.448732		Frag. 443-466
Y6	Y	6	764.309	764.31	0.000808533	1.05786		LIKTVET(RDGQ)VINETSQHH DDLE
Y7	Y	7	892.367	892.371	0.00322853	3.61794
Y8	Y	8	979.4	979.401	0.00119853	1.22374
Y9	Y	9	1080.45	1080.45	-0.000481467	-0.445618		Rt 20.1-20.35 min
Y10	Y	10	1209.49	1209.49	-7.14669e-05	-0.0590885
Y11	Y	11	1323.53	1323.53	0.000998533	0.754445
Y12	Y	12	1436.62	1436.62	-6.14669e-05	-0.0427859
Y13	Y	13	1535.69	1535.68	-0.00347147	-2.26053
Name	Ion Type	Ion Number	Theoretical Mass	Observed Mass	Mass Difference (Da)	Mass Difference (ppm)
B2	B	2	212.152	212.153	0.000253533	1.19505
Y1	Y	1	174.112	174.112	4.85331e-05	0.278747
Y2	Y	2	303.154	303.154	-0.000541467	-1.78611
Y3	Y	3	416.238	416.238	-0.000601467	-1.44501
Y4	Y	4	487.275	487.275	-0.000711467	-1.46009
Y5	Y	5	616.318	616.318	-0.000301467	-0.489142
Y6	Y	6	687.355	687.354	-0.00141147	-2.05348
Y9	Y	9	1036.48	1036.48	-0.000791467	-0.763609
Y10	Y	10	1093.5	1093.5	-0.00125147	-1.14446		3195.66
Y11	Y	11	1164.54	1164.54	-0.00236147	-2.02781		Frag. 2-32
Y12	Y	12	1301.6	1301.6	-0.00127147	-0.976849		P69905 (HBA_HUMAN)
Y14	Y	14	1429.66	1429.66	-0.00284147	-1.98751
Y15	Y	15	1528.73	1528.73	0.000748533	0.489645
Y16	Y	16	1656.82	1656.83	0.00478853	2.89019
Y17	Y	17	1713.84	1713.84	-0.00267147	-1.55876
Y19	Y	19	1970.96	1970.96	-0.00409147	-2.07588
Y20	Y	20	2042	2042	-0.00120147	-0.588378
Y21	Y	21	2170.09	2170.1	0.00883853	4.07288
Name	Ion Type	Ion Number	Theoretical Mass	Observed Mass	Mass Difference (Da)	Mass Difference (ppm)
B2	B	2	270.144	270.144	-0.000316467	-1.17147
B3	B	3	383.228	383.229	0.000623533	1.62705
B4	B	4	482.297	482.297	0.000213533	0.442742
B5	B	5	581.365	581.365	-0.000196467	-0.337941		3197.68
B6	B	6	709.46	709.461	0.000843533	1.18898		Frag. 406-432
B7	B	7	810.508	810.508	0.000163533	0.201766		GFAP_HUMAN (P14136)
B14	B	14	1626.85	1626.85	0.000573533	0.352542		RNIVVKTVEMRDGEVIKESK QEHKDVM
B15	B	15	1725.92	1725.92	0.00116353	0.674153
B16	B	16	1839	1839.01	0.00210353	1.14384		Rt 19 min
Y1	Y	1	149.051	149.051	-0.000331467	-2.22385
Y4	Y	4	491.241	491.242	0.000358533	0.729851
Y5	Y	5	628.3	628.3	-0.000551467	-0.877712
Y9	Y	9	1100.53	1100.53	0.000288533	0.262177
Y10	Y	10	1229.57	1229.58	0.00469853	3.82128
Y11	Y	11	1357.67	1357.67	0.000738533	0.543973
Name	Ion Type	Ion Number	Theoretical Mass	Observed Mass	Mass Difference (Da)	Mass Difference (ppm)
B5	B	5	627.334	627.335	0.000703533	1.12146
B6	B	6	714.366	714.367	0.000673533	0.94284
B7	B	7	827.45	827.45	-0.000386467	-0.467058		3197.74		Rt 20.6 min
B8	B	8	942.477	942.477	-0.000326467	-0.346392		Frag. 388-415
B9	B	9	1043.52	1043.52	-0.00100647	-0.964488		P14136 (GFAP_HUMAN)
B11	B	11	1258.65	1258.65	-0.00199647	-1.58619		QIRETSLDTKSVSEGHLKRNIVVKTVEM
Y1	Y	1	149.051	149.051	-0.000331467	-2.22385
Y5	Y	5	606.305	606.305	2.85331e-05	0.0470607
Y11	Y	11	1315.76	1315.76	0.000148533	0.112887
Y14	Y	14	1622.93	1622.93	-0.00128147	-0.789601
Y16	Y	16	1839	1839	-0.000901467	-0.490193
Name	Ion Type	Ion Number	Theoretical Mass	Observed Mass	Mass Difference (Da)	Mass Difference (ppm)
B5	B	5	628.318	628.322	0.00368753	5.8689
B6	B	6	715.35	715.35	-0.000342467	-0.47874
B7	B	7	828.434	828.434	-0.000402467	-0.485816
B8	B	8	943.461	943.46	-0.00134247	-1.42292
B9	B	9	1044.51	1044.52	0.00697753	6.68021		3198.72
B11	B	11	1259.64	1259.64	0.00298753	2.37174		Frag. 388-415
Y1	Y	1	149.051	149.051	-0.000331467	-2.22385		P14136 (GFAP_HUMAN)
Y12	Y	12	1428.85	1428.86	0.00708853	4.96101		(QIR)ETSLDTKSVSEGHLKRNIVVKTVEM
Name	Ion Type	Ion Number	Theoretical Mass	Observed Mass	Mass Difference (Da)	Mass Difference (ppm)		Rt 20.9 min
B3	B	3	383.228	383.229	0.000623533	1.62705
B4	B	4	482.297	482.297	0.000213533	0.442742
B5	B	5	581.365	581.365	-0.000196467	-0.337941
B6	B	6	709.46	709.46	-0.000156467	-0.220544
B7	B	7	810.508	810.508	0.000163533	0.201766
B9	B	9	1038.62	1038.62	0.000163533	0.157453
B10	B	10	1169.66	1169.66	-0.000326467	-0.279113
Y1	Y	1	149.051	149.051	-0.000331467	-2.22385
Y4	Y	4	491.241	491.242	0.000358533	0.729851
Y5	Y	5	628.3	628.301	0.000448533	0.713883
Y6	Y	6	757.343	757.343	-0.000141467	-0.186794
Y10	Y	10	1229.57	1229.57	-0.000301467	-0.245181		3198.67
Y11	Y	11	1357.67	1357.67	0.000738533	0.543973		Frag. 406-432
Y12	Y	12	1470.75	1470.75	-0.00132147	-0.898499		GFAP_HUMAN (P14136)
Y13	Y	13	1569.82	1569.82	-0.00173147	-1.10297		RNIVVKTVEMRDGEVIKESK QEHKDVM
Y15	Y	15	1755.88	1755.88	0.00221853	1.26349
Y16	Y	16	1870.91	1870.91	-0.00172147	-0.920123		Rt 21.6 min
Name	Ion Type	Ion Number	Theoretical Mass	Observed Mass	Mass Difference (Da)	Mass Difference (ppm)
B8	B	8	1042.61	1042.62	0.00190353	1.82573
B11	B	11	1399.82	1399.82	-0.00132647	-0.947598
B11	B	11	1399.82	1399.82	0.00167353	1.19553
B11	B	11	1399.82	1399.83	0.00867353	6.19618
B12	B	12	1530.86	1530.86	0.00118353	0.773116		4023.2
B12	B	12	1530.86	1530.86	0.00318353	2.07957		α-1-Antichimotrypsin
B13	B	13	1643.94	1643.95	0.00212353	1.29173		Frag. 390-423
B13	B	13	1643.94	1643.95	0.00312353	1.90002						4023.2
B14	B	14	1757.03	1757.03	0.00206353	1.17444
B14	B	14	1757.03	1757.03	0.00306353	1.74359
B15	B	15	1856.1	1856.1	0.00365353	1.9684
B16	B	16	1953.15	1953.15	0.00289353	1.48147
B17	B	17	2054.2	2054.2	0.00221353	1.07757
B17	B	17	2054.2	2054.2	0.00321353	1.56437
B18	B	18	2169.22	2169.23	0.00327353	1.50908
B18	B	18	2169.22	2169.23	0.00327353	1.50908
B19	B	19	2270.27	2270.28	0.00759353	3.34477
B20	B	20	2398.33	2398.33	-0.00198647	-0.828271
B21	B	21	2512.37	2512.38	0.00408353	1.62537
B22	B	22	2625.46	2625.46	0.00702353	2.67517
Y4	Y	4	442.254	442.255	0.000748533	1.69254
Y4	Y	4	442.254	442.255	0.000748533	1.69254
Y4	Y	4	442.254	442.255	0.000748533	1.69254
Y5	Y	5	556.297	556.298	0.000818533	1.4714
Y6	Y	6	657.345	657.346	0.00113853	1.73202
Y6	Y	6	657.345	657.346	0.00113853	1.73202
Y9	Y	9	971.54	971.54	-0.000261467	-0.269126
Y9	Y	9	971.54	971.541	0.000738533	0.760167
Y10	Y	10	1102.58	1102.58	0.00224853	2.03934
Y11	Y	11	1249.65	1249.65	0.00183853	1.47124
Y11	Y	11	1249.65	1249.65	0.00383853	3.07169
Y12	Y	12	1396.72	1396.72	-0.000571467	-0.40915
Y12	Y	12	1396.72	1396.72	0.00142853	1.02278
Name	Ion Type	Ion Number	Theoretical Mass	Observed Mass	Mass Difference (Da)	Mass Difference (ppm)
B2	B	2	186.1	186.101	0.000283533	1.52355
B2	B	2	186.1	186.101	0.000283533	1.52355
B7	B	7	709.339	709.342	0.00223353	3.14875
B10	B	10	1107.58	1107.58	0.000233533	0.21085
B11	B	11	1220.66	1220.66	0.00217353	1.78062
B12	B	12	1319.73	1319.73	0.00176353	1.33628
B12	B	12	1319.73	1319.73	0.00276353	2.09401
B14	B	14	1546.89	1546.89	-0.00160647	-1.03851
B20	B	20	2278.22	2278.2	-0.0178265	-7.82473
B23	B	23	2563.35	2563.37	0.0147135	5.73995
B32	B	32	3670.96	3670.97	0.0140735	3.83375
Y2	Y	2	248.119	248.12	0.000258533	1.04197
Y2	Y	2	248.119	248.12	0.000258533	1.04197
Y4	Y	4	491.241	491.242	0.000358533	0.729851
Y4	Y	4	491.241	491.242	0.000358533	0.729851		4035.12
Y5	Y	5	628.3	628.301	0.000448533	0.713883		Frag. 398 –432
Y5	Y	5	628.3	628.301	0.000448533	0.713883		P14136 (GFAP_HUMAN)
Y6	Y	6	757.343	757.344	0.000858533	1.13361
Y7	Y	7	885.401	885.403	0.00127853	1.44402
Y7	Y	7	885.401	885.404	0.00227853	2.57345
Y9	Y	9	1100.53	1100.53	-0.00171147	-1.55513
Y9	Y	9	1100.53	1100.53	-0.000711467	-0.646478
Y10	Y	10	1229.57	1229.57	-0.000301467	-0.245181
Y10	Y	10	1229.57	1229.57	0.00269853	2.19469
Y11	Y	11	1357.67	1357.67	0.00273853	2.01709
Y11	Y	11	1357.67	1357.68	0.0117385	8.64611
Y18	Y	18	2158.05	2158.06	0.00467853	2.16794
Y18	Y	18	2158.05	2158.06	0.0106785	4.94823
Y21	Y	21	2487.21	2487.22	0.0139985	5.62821
Y31	Y	31	3631.93	3631.94	0.00972853	2.67861
Y33	Y	33	3848	3848.01	0.0111085	2.88683
Y33	Y	33	3848	3848.02	0.0211085	5.48558
Name	Ion Type	Ion Number	Theoretical Mass	Observed Mass	Mass Difference (Da)	Mass Difference (ppm)
B2	B	2	186.1	186.101	0.000283533	1.52355
B9	B	9	994.52	994.524	0.00413593	4.15872
Y4	Y	4	491.241	491.242	0.000358533	0.729851		4036.11
Y5	Y	5	628.3	628.301	0.000448533	0.713883		Frag. 398 –432
Y9	Y	9	1100.53	1100.53	0.00128853	1.17083		P14136 (GFAP_HUMAN)
Y10	Y	10	1229.57	1229.58	0.00469853	3.82128		SVS EGHLKRNIVV KTVEMRDGEV IKESKQEHKD VM
Y10	Y	10	1229.57	1229.58	0.00569853	4.63457
Y11	Y	11	1357.67	1357.67	0.00673853	4.96332
Y18	Y	18	2158.05	2158.06	0.0106785	4.94823
Y21	Y	21	2487.21	2487.23	0.0209985	8.44261
Y22	Y	22	2615.3	2615.32	0.0140385	5.36784
Name	Ion Type	Ion Number	Theoretical Mass	Observed Mass	Mass Difference (Da)	Mass Difference (ppm)
B2	B	2	186.1	186.101	0.000283533	1.52355
B11	B	11	1220.66	1220.66	0.000173533	0.142163
B12	B	12	1319.73	1319.73	-0.000236467	-0.179178
B12	B	12	1319.73	1319.73	0.000763533	0.578552
Y1	Y	1	149.051	149.051	-0.000331467	-2.22385		4036.1
Y4	Y	4	491.241	491.242	0.000358533	0.729851		Frag. 398 –432
Y5	Y	5	628.3	628.301	0.000448533	0.713883		P14136 (GFAP_HUMAN)
Y5	Y	5	628.3	628.302	0.00144853	2.30548		SVS EGHLKRNIVV KTVEMRDGEV IKESKQEHKD VM
Y10	Y	10	1229.57	1229.57	0.000698533	0.568111
Y10	Y	10	1229.57	1229.57	0.00169853	1.3814
Y11	Y	11	1357.67	1357.66	-0.00126147	-0.929144
Y11	Y	11	1357.67	1357.67	0.000738533	0.543973
Y12	Y	12	1470.75	1470.75	-0.00232147	-1.57842
Y12	Y	12	1470.75	1470.75	-0.000321467	-0.218573
Y13	Y	13	1569.82	1569.82	0.00126853	0.808076
Y15	Y	15	1755.88	1755.88	0.00221853	1.26349
Y16	Y	16	1870.91	1870.91	-0.000721467	-0.385624
Y16	Y	16	1870.91	1870.91	0.00227853	1.21787
Name	Ion Type	Ion Number	Theoretical Mass	Observed Mass	Mass Difference (Da)	Mass Difference (ppm)
B2	B	2	186.1	186.101	0.000283533	1.52355
B9	B	9	994.52	994.52	0.000135933	0.136682
B15	B	15	1648.93	1648.93	0.00568593	3.44826
Y2	Y	2	248.119	248.12	0.000258533	1.04197
Y4	Y	4	491.241	491.242	0.000358533	0.729851
Y5	Y	5	628.3	628.3	-0.000551467	-0.877712
Y5	Y	5	628.3	628.301	0.000448533	0.713883
Y6	Y	6	757.343	757.344	0.000858533	1.13361		4037.08
Y7	Y	7	885.401	885.402	0.000278533	0.314584		Frag. 398 –432
Y7	Y	7	885.401	885.405	0.00327853	3.70288		P14136 (GFAP_HUMAN)
Y7	Y	7	885.401	885.407	0.00527853	5.96174		SVS EGHLKRNIVV KTVEMRDGEV IKESKQEHKD VM
Y8	Y	8	1013.5	1013.5	0.00331853	3.27434
Y8	Y	8	1013.5	1013.5	0.00531853	5.24771
Y9	Y	9	1100.53	1100.53	-0.00171147	-1.55513
Y9	Y	9	1100.53	1100.53	0.00328853	2.98814
Y10	Y	10	1229.57	1229.57	-0.000301467	-0.245181
Y10	Y	10	1229.57	1229.57	0.000698533	0.568111
Y11	Y	11	1357.67	1357.67	-0.000261467	-0.192586
Y11	Y	11	1357.67	1357.67	0.000738533	0.543973
Y12	Y	12	1470.75	1470.75	-0.00232147	-1.57842
Y12	Y	12	1470.75	1470.75	-0.00132147	-0.898499
Y12	Y	12	1470.75	1470.75	-0.000321467	-0.218573
Y13	Y	13	1569.82	1569.82	-0.00173147	-1.10297
Y13	Y	13	1569.82	1569.82	-0.000731467	-0.465956
Y13	Y	13	1569.82	1569.82	0.00126853	0.808076
Y15	Y	15	1755.88	1755.88	-0.00278147	-1.58408
Y15	Y	15	1755.88	1755.88	-0.00178147	-1.01457
Y16	Y	16	1870.91	1870.91	-0.00172147	-0.920123
Y16	Y	16	1870.91	1870.91	-0.000721467	-0.385624
Y16	Y	16	1870.91	1870.91	0.000278533	0.148876
Name	Ion Type	Ion Number	Theoretical Mass	Observed Mass	Mass Difference (Da)	Mass Difference (ppm)
B2	B	2	210.137	210.137	-9.64669e-05	-0.459067
B9	B	9	1052.6	1052.6	0.00188353	1.78941
B13	B	13	1542.86	1542.86	0.00289353	1.87543
B15	B	15	1786.98	1786.99	0.00434353	2.43065
Y1	Y	1	146.106	146.106	0.000198533	1.35883
Y2	Y	2	274.164	274.165	0.000618533	2.25607		4046.21
Y3	Y	3	375.212	375.213	0.000938533	2.50134		α-1-Antitrypsin
Y4	Y	4	472.265	472.265	0.000178533	0.378036		Frag. 384-418
Y5	Y	5	586.307	586.309	0.00124853	2.12949
Y6	Y	6	685.376	685.377	0.000838533	1.22346
Y7	Y	7	784.444	784.446	0.00142853	1.82108
Y8	Y	8	912.539	912.541	0.00146853	1.60928
Y9	Y	9	969.561	969.562	0.00100853	1.0402
Y10	Y	10	1100.6	1100.6	0.00151853	1.37973
Y11	Y	11	1247.67	1247.67	0.00310853	2.49147
Y12	Y	12	1360.75	1360.76	0.00304853	2.24033
Y13	Y	13	1457.81	1457.81	0.00328853	2.25581
Y16	Y	16	1773.98	1773.98	0.00361853	2.03978
Y18	Y	18	2016.08	2016.08	0.000108533	0.0538337
Y19	Y	19	2145.13	2145.13	0.00551853	2.57259
Y20	Y	20	2258.21	2258.21	0.00145853	0.64588
Y21	Y	21	2389.25	2389.25	0.00396853	1.661
Y22	Y	22	2502.33	2502.34	0.00290853	1.16233
Y23	Y	23	2649.4	2649.41	0.00949853	3.58516
Y26	Y	26	2992.59	2992.61	0.0169185	5.65347
Y34	Y	34	3932.11	3932.11	0.00413853	1.0525
Name	Ion Type	Ion Number	Theoretical Mass	Observed Mass	Mass Difference (Da)	Mass Difference (ppm)
B2	B	2	200.116	200.116	-0.000366467	-1.83127
B3	B	3	297.169	297.169	-0.000126467	-0.425572
Y1	Y	1	147.053	147.053	-0.000431467	-2.93409
Y1	Y	1	147.053	147.054	0.000568533	3.86617
Y2	Y	2	260.137	260.138	0.000508533	1.95486
Y5	Y	5	627.25	627.25	-0.000281467	-0.448732
Y5	Y	5	627.25	627.251	0.000718533	1.14553
Y6	Y	6	764.309	764.31	0.000808533	1.05786		4225.19
Y8	Y	8	979.4	979.398	-0.00180147	-1.83936		Frag. 430-466
Y8	Y	8	979.4	979.4	0.000198533	0.202709		P08670 (VIME_HUMAN)
Y8	Y	8	979.4	979.401	0.00119853	1.22374
Y9	Y	9	1080.45	1080.44	-0.00748147	-6.92442
Y9	Y	9	1080.45	1080.44	-0.00448147	-4.14779
Y9	Y	9	1080.45	1080.45	0.00551853	5.10764
Y10	Y	10	1209.49	1209.5	0.00892853	7.38207
Y11	Y	11	1323.53	1323.53	0.000998533	0.754445
Y11	Y	11	1323.53	1323.53	0.000998533	0.754445
Y11	Y	11	1323.53	1323.54	0.00499853	3.77666
Y21	Y	21	2422.1	2422.1	-0.000921467	-0.380441
Y21	Y	21	2422.1	2422.11	0.0110785	4.57394
Y33	Y	33	3813.92	3813.95	0.0262185	6.87442
Y35	Y	35	4024.06	4024.05	-0.00860147	-2.13751
Name	Ion Type	Ion Number	Theoretical Mass	Observed Mass	Mass Difference (Da)	Mass Difference (ppm)
B2	B	2	200.116	200.116	-0.000366467	-1.83127
B3	B	3	297.169	297.169	-0.000126467	-0.425572
B16	B	16	1802.08	1802.08	-4.64669e-05	-0.0257852
Y5	Y	5	627.25	627.25	-0.000281467	-0.448732
Y6	Y	6	764.309	764.309	-0.000191467	-0.25051
Y8	Y	8	979.4	979.4	0.000198533	0.202709
Y9	Y	9	1080.45	1080.45	0.000518533	0.479925
Y10	Y	10	1209.49	1209.49	0.000928533	0.767706		4226.18
Y11	Y	11	1323.53	1323.53	0.00199853	1.51		Frag. 430-466
Y12	Y	12	1436.62	1436.62	0.00193853	1.34937		P08670 (VIME_HUMAN)
Y13	Y	13	1535.69	1535.69	0.00352853	2.29769		S LPLVDTHSKR TLLIKTVETR DGQVINETSQ HHDDLE
Y16	Y	16	1835.79	1835.8	0.00354853	1.93297
Name	Ion Type	Ion Number	Theoretical Mass	Observed Mass	Mass Difference (Da)	Mass Difference (ppm)
B8	B	8	954.561	954.564	0.00267353	2.8008
B14	B	14	1728.98	1728.97	-0.00700647	-4.05237
B15	B	15	1860.02	1860.02	-0.00249647	-1.34217
B15	B	15	1860.02	1860.02	0.00250353	1.34597
B16	B	16	1973.1	1973.11	0.00444353	2.25205
B16	B	16	1973.1	1973.11	0.00644353	3.26568
B17	B	17	2086.19	2086.19	0.00438353	2.10122
B17	B	17	2086.19	2086.19	0.00638353	3.0599
B18	B	18	2185.26	2185.26	0.00297353	1.36073
B18	B	18	2185.26	2185.26	0.00497353	2.27595
B19	B	19	2282.31	2282.31	-0.00178647	-0.782746
B20	B	20	2383.36	2383.36	0.00553353	2.32174
B20	B	20	2383.36	2383.38	0.0205335	8.61539
B21	B	21	2498.38	2498.39	0.00259353	1.03808		4352.36
B21	B	21	2498.38	2498.39	0.00359353	1.43834		Alpha-1-antichymotrypsin
B22	B	22	2599.43	2599.44	0.00691353	2.65963		Frag. 387-422
B22	B	22	2599.43	2599.44	0.00691353	2.65963
B23	B	23	2727.49	2727.49	-0.000666467	-0.244352		P01011 (AACT_HUMAN)
B23	B	23	2727.49	2727.5	0.00833353	3.05539
B24	B	24	2841.53	2841.53	-0.00159647	-0.561833
B24	B	24	2841.53	2841.54	0.00540353	1.90163
B25	B	25	2954.62	2954.62	0.00834353	2.8239
Y2	Y	2	217.106	217.107	0.000468533	2.15808
Y2	Y	2	217.106	217.107	0.000468533	2.15808
Y3	Y	3	345.201	345.202	0.000508533	1.47315
Y3	Y	3	345.201	345.202	0.000508533	1.47315
Y4	Y	4	442.254	442.255	0.000748533	1.69254
Y4	Y	4	442.254	442.255	0.000748533	1.69254
Y5	Y	5	556.297	556.298	0.000818533	1.4714
Y5	Y	5	556.297	556.299	0.00181853	3.269
Y6	Y	6	657.345	657.346	0.00113853	1.73202
Y8	Y	8	884.508	884.511	0.00276853	3.13003
Y9	Y	9	971.54	971.541	0.000738533	0.760167
Y10	Y	10	1102.58	1102.58	0.00224853	2.03934
Y11	Y	11	1249.65	1249.65	-0.00216147	-1.72966
Y11	Y	11	1249.65	1249.65	0.000838533	0.671015
Y12	Y	12	1396.72	1396.72	0.00242853	1.73874
Y12	Y	12	1396.72	1396.72	0.00342853	2.45471
Y14	Y	14	1623.84	1623.85	0.00543853	3.34917
Name	Ion Type	Ion Number	Theoretical Mass	Observed Mass	Mass Difference (Da)	Mass Difference (ppm)
B5	B	5	584.244	584.245	0.000528533	0.904644
B6	B	6	715.285	715.285	3.85331e-05	0.053871		4617.36
B7	B	7	786.322	786.323	0.000928533	1.18086		Thymosin β4-desAGES
B8	B	8	915.364	915.365	0.000338533	0.369834
Y1	Y	1	146.069	146.069	-0.000421467	-2.88539
Y2	Y	2	274.164	274.165	0.000618533	2.25607
Y4	Y	4	531.265	531.266	0.000448533	0.844273
Y5	Y	5	660.308	660.309	0.000858533	1.3002
Y6	Y	6	773.392	773.392	-0.000201467	-0.260498
Y7	Y	7	874.44	874.44	0.000118533	0.135553
Y8	Y	8	1003.48	1003.48	-0.00147147	-1.46636
Y9	Y	9	1131.58	1131.58	0.00356853	3.15359
Y10	Y	10	1218.61	1218.62	0.00853853	7.00679
Y11	Y	11	1315.66	1315.66	0.000778533	0.591743
Y13	Y	13	1525.8	1525.8	0.00195853	1.28361
Name	Ion Type	Ion Number	Theoretical Mass	Observed Mass	Mass Difference (Da)	Mass Difference (ppm)
B5	B	5	584.244	584.245	0.000528533	0.904644
B6	B	6	715.285	715.285	3.85331e-05	0.053871
B7	B	7	786.322	786.323	0.000928533	1.18086
B7	B	7	786.322	786.323	0.000928533	1.18086
B8	B	8	915.364	915.365	0.000338533	0.369834
B8	B	8	915.364	915.365	0.000338533	0.369834
Y4	Y	4	402.223	402.223	4.85331e-05	0.120662
Y6	Y	6	659.324	659.324	-0.000121467	-0.184229
Y6	Y	6	659.324	659.326	0.00187853	2.84918		4745.43
Y13	Y	13	1443.72	1443.72	0.000208533	0.144441		Thymosin β4 desES
Y13	Y	13	1443.72	1443.72	0.00120853	0.837096
Name	Ion Type	Ion Number	Theoretical Mass	Observed Mass	Mass Difference (Da)	Mass Difference (ppm)
B5	B	5	568.249	568.25	0.000413533	0.727732
B5	B	5	568.249	568.25	0.000413533	0.727732
B5	B	5	568.249	568.25	0.000413533	0.727732
B6	B	6	699.29	699.289	-0.00107647	-1.53937
B6	B	6	699.29	699.29	-7.64669e-05	-0.109349
B6	B	6	699.29	699.29	-7.64669e-05	-0.109349
B7	B	7	756.311	756.311	-0.000536467	-0.70932
B7	B	7	756.311	756.311	-0.000536467	-0.70932
B7	B	7	756.311	756.311	-0.000536467	-0.70932				Chain 2 – 44
B8	B	8	885.354	885.354	-0.000126467	-0.142843
B8	B	8	885.354	885.354	-0.000126467	-0.142843		4934.54
B8	B	8	885.354	885.354	-0.000126467	-0.142843		Thymosin β10
B9	B	9	998.438	998.439	0.000813533	0.814806
B9	B	9	998.438	998.444	0.00581353	5.82263
Y2	Y	2	218.127	218.127	6.85331e-05	0.31419
Y5	Y	5	590.302	590.303	0.000338533	0.573491
Y5	Y	5	590.302	590.303	0.000338533	0.573491
Y5	Y	5	590.302	590.303	0.000338533	0.573491
Y6	Y	6	718.397	718.398	0.000378533	0.526913
Y6	Y	6	718.397	718.398	0.000378533	0.526913
Y6	Y	6	718.397	718.398	0.000378533	0.526913
Y7	Y	7	847.44	847.44	-0.000211467	-0.249536
Y7	Y	7	847.44	847.44	-0.000211467	-0.249536
Y8	Y	8	975.499	975.499	0.000208533	0.213771
Y8	Y	8	975.499	975.499	0.000208533	0.213771
Y8	Y	8	975.499	975.499	0.000208533	0.213771
Y9	Y	9	1104.54	1104.54	-0.000381467	-0.345362
Y9	Y	9	1104.54	1104.54	-0.000381467	-0.345362
Y9	Y	9	1104.54	1104.54	-0.000381467	-0.345362
Y10	Y	10	1217.63	1217.62	-0.000441467	-0.362564
Y10	Y	10	1217.63	1217.62	-0.000441467	-0.362564
Y10	Y	10	1217.63	1217.63	0.00155853	1.27998
Y11	Y	11	1318.67	1318.67	-0.000121467	-0.092113
Y11	Y	11	1318.67	1318.67	-0.000121467	-0.092113
Y11	Y	11	1318.67	1318.67	0.000878533	0.666225
Y12	Y	12	1447.72	1447.71	-0.000711467	-0.491441
Y12	Y	12	1447.72	1447.72	0.000288533	0.199302
Y12	Y	12	1447.72	1447.72	0.00128853	0.890046
Y13	Y	13	1575.81	1575.81	-0.00167147	-1.0607
Y13	Y	13	1575.81	1575.81	-0.000671467	-0.426109
Y13	Y	13	1575.81	1575.81	0.000328533	0.208485
Y14	Y	14	1676.86	1676.86	-0.00235147	-1.40231
Y14	Y	14	1676.86	1676.86	-0.000351467	-0.209598
Y14	Y	14	1676.86	1676.86	-0.000351467	-0.209598
Y15	Y	15	1773.91	1773.91	-0.000111467	-0.0628368
Y15	Y	15	1773.91	1773.91	-0.000111467	-0.0628368
Y15	Y	15	1773.91	1773.91	0.000888533	0.500889
Y15	Y	15	1773.91	1773.91	0.000888533	0.500889
Y16	Y	16	1886.99	1887	0.00582853	3.08879
Y17	Y	17	1988.04	1988.04	0.00114853	0.577721
Y18	Y	18	2102.09	2102.08	-0.00178147	-0.847476
Y18	Y	18	2102.09	2102.09	0.00321853	1.53111
Y18	Y	18	2102.09	2102.09	0.00321853	1.53111
Y19	Y	19	2230.18	2230.19	0.0122585	5.49666
Name	Ion Type	Ion Number	Theoretical Mass	Observed Mass	Mass Difference (Da)	Mass Difference (ppm)
B3	B	3	386.191	386.192	0.000343533	0.889541
B4	B	4	500.234	500.235	0.000413533	0.826679
B4	B	4	500.234	500.235	0.000413533	0.826679
B4	B	4	500.234	500.235	0.000413533	0.826679
B5	B	5	613.318	613.319	0.000353533	0.576427
B5	B	5	613.318	613.319	0.000353533	0.576427
B5	B	5	613.318	613.319	0.000353533	0.576427
B6	B	6	728.345	728.346	0.000413533	0.567771
B6	B	6	728.345	728.346	0.000413533	0.567771
B6	B	6	728.345	728.346	0.000413533	0.567771		4953.54
B7	B	7	815.377	815.378	0.000383533	0.470375		Frag. 424-466
B7	B	7	815.377	815.378	0.000383533	0.470375		P08670 (VIME_HUMAN)
B7	B	7	815.377	815.378	0.000383533	0.470375
B8	B	8	928.461	928.462	0.000323533	0.348462
B8	B	8	928.461	928.463	0.00132353	1.42551
B8	B	8	928.461	928.463	0.00132353	1.42551
B9	B	9	1025.51	1025.51	0.000563533	0.549513
B10	B	10	1138.6	1138.6	-0.00149647	-1.31431
B10	B	10	1138.6	1138.6	0.00250353	2.19879
B12	B	12	1352.69	1352.69	0.00115353	0.852768
B21	B	21	2402.33	2402.35	0.0186035	7.74396
B22	B	22	2530.42	2530.42	0.000643533	0.254318
B30	B	30	3416.84	3416.83	-0.00480647	-1.4067
B31	B	31	3515.91	3515.91	0.00278353	0.791697
Y5	Y	5	627.25	627.25	-0.000281467	-0.448732
Y5	Y	5	627.25	627.251	0.000718533	1.14553
Y6	Y	6	764.309	764.31	0.000808533	1.05786
Y6	Y	6	764.309	764.31	0.000808533	1.05786
Y6	Y	6	764.309	764.31	0.000808533	1.05786
Y8	Y	8	979.4	979.4	0.000198533	0.202709
Y8	Y	8	979.4	979.4	0.000198533	0.202709
Y8	Y	8	979.4	979.401	0.00119853	1.22374
Y9	Y	9	1080.45	1080.45	0.000518533	0.479925
Y10	Y	10	1209.49	1209.49	0.000928533	0.767706
Y10	Y	10	1209.49	1209.49	0.000928533	0.767706
Y11	Y	11	1323.53	1323.53	-1.46688e-06	-0.00110831
Y11	Y	11	1323.53	1323.53	0.000998533	0.754445
Y11	Y	11	1323.53	1323.53	0.00199853	1.51
Y12	Y	12	1436.62	1436.62	-6.14669e-05	-0.0427859
Y12	Y	12	1436.62	1436.63	0.0109385	7.61409
Y18	Y	18	2092.94	2092.94	0.00375853	1.79581
Y20	Y	20	2321.05	2321.05	-0.000241467	-0.104033
Y21	Y	21	2422.1	2422.1	0.00107853	0.445289
Y22	Y	22	2550.19	2550.2	0.00711853	2.79137
Y23	Y	23	2663.28	2663.28	-0.00194147	-0.728976
Y29	Y	29	3361.72	3361.74	0.0161585	4.80662
Y31	Y	31	3599.83	3599.82	-0.00843147	-2.34219
Y32	Y	32	3714.86	3714.86	0.00462853	1.24595
Y32	Y	32	3714.86	3714.89	0.0326285	8.78326
Y33	Y	33	3813.92	3813.93	0.00421853	1.10609
Y34	Y	34	3927.01	3927.01	0.00415853	1.05896
Y35	Y	35	4024.06	4024.06	-0.000601467	-0.149468
Name	Ion Type	Ion Number	Theoretical Mass	Observed Mass	Mass Difference (Da)	Mass Difference (ppm)
B4	B	4	500.234	500.235	0.000413533	0.826679
B5	B	5	613.318	613.32	0.00135353	2.2069
B6	B	6	728.345	728.346	0.000413533	0.567771		4954.53
B7	B	7	815.377	815.378	0.000383533	0.470375		Frag. 424-466
B8	B	8	928.461	928.463	0.00132353	1.42551		P08670 (VIME_HUMAN)
Y5	Y	5	627.25	627.251	0.000718533	1.14553
Y6	Y	6	764.309	764.31	0.000808533	1.05786		RETNLDS LPLVDTHSKR TLLIKTVETR DGQVINETSQ HHDDLE
Y9	Y	9	1080.45	1080.45	-0.00148147	-1.37116
Y11	Y	11	1323.53	1323.53	0.00199853	1.51
Y12	Y	12	1436.62	1436.62	0.000938533	0.653294
Name	Ion Type	Ion Number	Theoretical Mass	Observed Mass	Mass Difference (Da)	Mass Difference (ppm)
B3	B	3	372.164	372.165	0.000228533	0.614065
B3	B	3	372.164	372.165	0.000228533	0.614065
B6	B	6	715.285	715.285	3.85331e-05	0.053871
B6	B	6	715.285	715.285	3.85331e-05	0.053871
B6	B	6	715.285	715.285	3.85331e-05	0.053871
B7	B	7	786.322	786.322	-7.14669e-05	-0.0908876
B7	B	7	786.322	786.323	0.000928533	1.18086
B7	B	7	786.322	786.323	0.000928533	1.18086
B8	B	8	915.364	915.364	-0.000661467	-0.722627
B8	B	8	915.364	915.365	0.000338533	0.369834		4961.5
B8	B	8	915.364	915.365	0.000338533	0.369834
B9	B	9	1028.45	1028.45	0.000278533	0.270828		Thymosin β4
B9	B	9	1028.45	1028.45	0.00127853	1.24317
B9	B	9	1028.45	1028.45	0.00227853	2.21551
B10	B	10	1157.49	1157.49	0.00168853	1.45879
B10	B	10	1157.49	1157.5	0.00668853	5.77848
B13	B	13	1547.68	1547.69	0.0103785	6.70586
B19	B	19	2260.18	2260.18	0.00344853	1.52578
B23	B	23	2719.37	2719.39	0.0149185	5.48602
B24	B	24	2848.42	2848.43	0.0163285	5.7325
Y1	Y	1	105.043	105.043	0.000128533	1.22363
Y1	Y	1	105.043	105.043	0.000128533	1.22363
Y6	Y	6	618.297	618.297	-0.000571467	-0.924259
Y6	Y	6	618.297	618.298	0.000428533	0.693086
Y6	Y	6	618.297	618.298	0.000428533	0.693086
Y7	Y	7	747.34	747.341	0.000838533	1.12202
Y7	Y	7	747.34	747.341	0.000838533	1.12202
Y7	Y	7	747.34	747.342	0.00183853	2.4601
Y8	Y	8	875.398	875.399	0.000258533	0.295332
Y10	Y	10	1117.53	1117.53	0.00260853	2.33421
Y11	Y	11	1218.57	1218.58	0.00292853	2.40325
Y13	Y	13	1475.71	1475.71	0.00237853	1.61179
Y15	Y	15	1659.8	1659.8	0.000588533	0.354582
Y15	Y	15	1659.8	1659.8	0.000588533	0.354582
Y15	Y	15	1659.8	1659.8	0.00158853	0.957066
Y17	Y	17	1869.93	1869.93	0.000768533	0.410995
Name	Ion Type	Ion Number	Theoretical Mass	Observed Mass	Mass Difference (Da)	Mass Difference (ppm)
B5	B	5	584.244	584.245	0.000528533	0.904644
B5	B	5	584.244	584.246	0.00152853	2.61626
B6	B	6	731.28	731.281	0.00112353	1.53639
B7	B	7	802.317	802.318	0.00101353	1.26326
B7	B	7	802.317	802.319	0.00201353	2.50965
B8	B	8	931.359	931.36	0.000423533	0.454747
B9	B	9	1044.44	1044.44	0.000363533	0.348064
B10	B	10	1173.49	1173.49	0.00777353	6.62431		4977.49
B24	B	24	2864.41	2864.43	0.0224135	7.82483		Thymosin β4 (Oxidized)
Y1	Y	1	105.043	105.043	0.000128533	1.22363
Y6	Y	6	618.297	618.298	0.000428533	0.693086		SDKPDMAEI EKFDKSKLKK TETQEKNPLP SKETIEQEKQ AGES
Y6	Y	6	618.297	618.299	0.00142853	2.31043
Y7	Y	7	747.34	747.341	0.000838533	1.12202
Y8	Y	8	875.398	875.396	-0.00274147	-3.13168
Y9	Y	9	1004.44	1004.44	0.000668533	0.665577
Y12	Y	12	1347.62	1347.63	0.0103385	7.67172
Y15	Y	15	1659.8	1659.8	0.000588533	0.354582
Y15	Y	15	1659.8	1659.8	0.00158853	0.957066
Name	Ion Type	Ion Number	Theoretical Mass	Observed Mass	Mass Difference (Da)	Mass Difference (ppm)
B8	B	8	942.477	942.478	0.000673533	0.714641
B9	B	9	1043.52	1043.53	0.00199353	1.91038
B11	B	11	1258.65	1258.65	-0.00299647	-2.3807
B20	B	20	2279.2	2279.21	0.0115435	5.06473
B32	B	32	3635.91	3635.92	0.0104335	2.86958
Y2	Y	2	261.132	261.133	0.000258533	0.990046
Y2	Y	2	261.132	261.133	0.000258533	0.990046
Y3	Y	3	398.191	398.192	0.000348533	0.87529
Y3	Y	3	398.191	398.192	0.000348533	0.87529
Y4	Y	4	527.234	527.234	-0.000241467	-0.457988		4976.61
Y4	Y	4	527.234	527.235	0.000758533	1.4387		Frag. 388 –430
Y5	Y	5	655.293	655.293	0.000178533	0.272448		P14136 (GFAP_HUMAN)
Y5	Y	5	655.293	655.293	0.000178533	0.272448
Y6	Y	6	783.388	783.39	0.00221853	2.83197
Y6	Y	6	783.388	783.39	0.00221853	2.83197
Y7	Y	7	870.42	870.421	0.00118853	1.36547
Y7	Y	7	870.42	870.421	0.00118853	1.36547
Y8	Y	8	999.462	999.461	-0.00140147	-1.40222
Y8	Y	8	999.462	999.462	-0.000401467	-0.401683
Y9	Y	9	1127.56	1127.56	0.000638533	0.566298
Y9	Y	9	1127.56	1127.56	0.00163853	1.45317
Y11	Y	11	1339.71	1339.72	0.00716853	5.35081
Y16	Y	16	1927.94	1927.94	0.00257853	1.33745
Y16	Y	16	1927.94	1927.95	0.00657853	3.4122
Y17	Y	17	2056.98	2056.99	0.00598853	2.91132
Y19	Y	19	2257.1	2257.11	0.00689853	3.05637
Y19	Y	19	2257.1	2257.11	0.00789853	3.49942
Y20	Y	20	2385.2	2385.2	0.00693853	2.909
Y20	Y	20	2385.2	2385.21	0.0119385	5.00526
Y31	Y	31	3617.89	3617.92	0.0210085	5.80684
Name	Ion Type	Ion Number	Theoretical Mass	Observed Mass	Mass Difference (Da)	Mass Difference (ppm)
B5	B	5	628.318	628.321	0.00268753	4.27735
B6	B	6	715.35	715.349	-0.00134247	-1.87666
B6	B	6	715.35	715.35	-0.000342467	-0.47874
B6	B	6	715.35	715.35	-0.000342467	-0.47874
B7	B	7	828.434	828.435	0.000597533	0.72128
B7	B	7	828.434	828.435	0.000597533	0.72128
B8	B	8	943.461	943.465	0.00365753	3.87672
B8	B	8	943.461	943.468	0.00665753	7.0565
B11	B	11	1259.64	1259.64	0.000987533	0.783983
B22	B	22	2492.33	2492.35	0.0150575	6.04154		4977.63
B22	B	22	2492.33	2492.35	0.0160575	6.44277		Frag. 388 –430
Y2	Y	2	261.132	261.133	0.000258533	0.990046		P14136 (GFAP_HUMAN)
Y2	Y	2	261.132	261.133	0.000258533	0.990046		(QIR) ETSLDTKSVSEGHLKRNIVV KTVEMRDGEV IKESKQEHKD
Y2	Y	2	261.132	261.133	0.000258533	0.990046
Y3	Y	3	398.191	398.192	0.000348533	0.87529
Y3	Y	3	398.191	398.192	0.000348533	0.87529
Y3	Y	3	398.191	398.192	0.000348533	0.87529
Y4	Y	4	527.234	527.234	-0.000241467	-0.457988
Y4	Y	4	527.234	527.235	0.000758533	1.4387
Y5	Y	5	655.293	655.293	0.000178533	0.272448
Y5	Y	5	655.293	655.293	0.000178533	0.272448
Y5	Y	5	655.293	655.294	0.00117853	1.79848
Y6	Y	6	783.388	783.389	0.00121853	1.55547
Y7	Y	7	870.42	870.42	0.000188533	0.2166
Y7	Y	7	870.42	870.42	0.000188533	0.2166
Y7	Y	7	870.42	870.42	0.000188533	0.2166
Y8	Y	8	999.462	999.461	-0.00140147	-1.40222
Y8	Y	8	999.462	999.462	-0.000401467	-0.401683
Y8	Y	8	999.462	999.466	0.00359853	3.60047
Y9	Y	9	1127.56	1127.56	-0.000361467	-0.320575
Y9	Y	9	1127.56	1127.56	-0.000361467	-0.320575
Y9	Y	9	1127.56	1127.56	0.000638533	0.566298
Y10	Y	10	1240.64	1240.64	0.00157853	1.27235
Y11	Y	11	1339.71	1339.71	0.00116853	0.872229
Y11	Y	11	1339.71	1339.71	0.00516853	3.85795
Y13	Y	13	1525.77	1525.78	0.00211853	1.3885
Y13	Y	13	1525.77	1525.78	0.00411853	2.69931
Y13	Y	13	1525.77	1525.78	0.00411853	2.69931
Y14	Y	14	1640.8	1640.8	0.000178533	0.108809
Y14	Y	14	1640.8	1640.8	0.00117853	0.718267
Y14	Y	14	1640.8	1640.81	0.00517853	3.1561
Y16	Y	16	1927.94	1927.96	0.0135785	7.04302
Y17	Y	17	2056.98	2056.99	0.00998853	4.85591
Y19	Y	19	2257.1	2257.11	0.00589853	2.61332
Y19	Y	19	2257.1	2257.12	0.0158985	7.04379
Y20	Y	20	2385.2	2385.21	0.00993853	4.16676
Y21	Y	21	2484.26	2484.29	0.0225285	9.06849
Y33	Y	33	3804	3804.02	0.0205685	5.40709
Name	Ion Type	Ion Number	Theoretical Mass	Observed Mass	Mass Difference (Da)	Mass Difference (ppm)
B5	B	5	628.318	628.319	0.000675933	1.07578
B6	B	6	715.35	715.35	-0.000354067	-0.494956
B7	B	7	828.434	828.434	-0.000414067	-0.499819
B8	B	8	943.461	943.461	-0.000354067	-0.375285
B9	B	9	1044.51	1044.51	-3.40669e-05	-0.0326152
B11	B	11	1259.64	1259.63	-0.00202407	-1.60687
B15	B	15	1631.8	1631.8	-0.00251407	-1.54067
B20	B	20	2280.18	2280.18	0.000515933	0.226268
B21	B	21	2393.27	2393.27	0.00145593	0.608346
B22	B	22	2492.33	2492.34	0.00604593	2.42581
B23	B	23	2591.4	2591.41	0.00563593	2.17486
Y2	Y	2	261.132	261.133	0.000258533	0.990046		4978.6
Y3	Y	3	398.191	398.192	0.000348533	0.87529		Frag. 388 –430
Y4	Y	4	527.234	527.234	-0.000241467	-0.457988		P14136 (GFAP_HUMAN)
Y5	Y	5	655.293	655.293	0.000178533	0.272448		(QIR) ETSLDTKSVSEGHLKRNIVV KTVEMRDGEV IKESKQEHKD
Y6	Y	6	783.388	783.387	-0.000781467	-0.997548
Y7	Y	7	870.42	870.42	0.000188533	0.2166
Y8	Y	8	999.462	999.462	-0.000401467	-0.401683
Y9	Y	9	1127.56	1127.56	-0.000361467	-0.320575
Y10	Y	10	1240.64	1240.64	0.000578533	0.466318
Y11	Y	11	1339.71	1339.71	0.000168533	0.125798
Y13	Y	13	1525.77	1525.77	0.000118533	0.0776872
Y14	Y	14	1640.8	1640.8	-0.000821467	-0.50065
Name	Ion Type	Ion Number	Theoretical Mass	Observed Mass	Mass Difference (Da)	Mass Difference (ppm)
B5	B	5	628.318	628.32	0.00167593	2.66733
B6	B	6	715.35	715.351	0.000645933	0.902961
B7	B	7	828.434	828.434	-0.000414067	-0.499819
B8	B	8	943.461	943.463	0.00164593	1.74457
B9	B	9	1044.51	1044.52	0.00696593	6.6691
B10	B	10	1172.6	1172.61	0.00800593	6.82748
B11	B	11	1259.64	1259.64	0.000975933	0.774774
B16	B	16	1768.86	1768.86	0.00457593	2.58694
B22	B	22	2493.32	2493.33	0.0160183	6.4245		4979.59
Y2	Y	2	261.132	261.133	0.000258533	0.990046		Frag. 388 –430
Y3	Y	3	398.191	398.192	0.000348533	0.87529		P14136 (GFAP_HUMAN)
Y5	Y	5	655.293	655.292	-0.000821467	-1.25359		(QIR) ETSLDTKSVSEGHLKRNIVV KTVEMRDGEV IKESKQEHKD
Y7	Y	7	870.42	870.421	0.00118853	1.36547
Y8	Y	8	999.462	999.462	-0.000401467	-0.401683
Y9	Y	9	1127.56	1127.56	-0.00136147	-1.20745
Y10	Y	10	1240.64	1240.64	0.000578533	0.466318
Y11	Y	11	1339.71	1339.71	0.00116853	0.872229
Y12	Y	12	1468.75	1468.76	0.00357853	2.43644
Y13	Y	13	1525.77	1525.77	0.00111853	0.733092
Y14	Y	14	1640.8	1640.8	-0.00182147	-1.11011
Name	Ion Type	Ion Number	Theoretical Mass	Observed Mass	Mass Difference (Da)	Mass Difference (ppm)
B6	B	6	714.366	714.367	0.000673533	0.94284
B7	B	7	827.45	827.45	-0.000386467	-0.467058
B7	B	7	827.45	827.451	0.000613533	0.741474
B8	B	8	942.477	942.477	-0.000326467	-0.346392
B9	B	9	1043.52	1043.52	-6.46688e-06	-0.00619715
B11	B	11	1258.65	1258.65	3.53312e-06	0.00280707
B20	B	20	2279.2	2279.2	0.00354353	1.55473
B22	B	22	2491.35	2491.36	0.00507353	2.03646
Y2	Y	2	232.106	232.106	-0.000191467	-0.824912		5075.69
Y3	Y	3	360.201	360.201	-0.000151467	-0.420507		Frag. 388-431
Y3	Y	3	360.201	360.201	-0.000151467	-0.420507		P14136 (GFAP_HUMAN)
Y4	Y	4	497.26	497.26	-6.14669e-05	-0.123611		QIRETSLDTKSVSEGHLKRNIVVKTVEMRDGEVIKESKQEHKDV
Y5	Y	5	626.302	626.304	0.00134853	2.15317
Y6	Y	6	754.361	754.361	-0.000231467	-0.306838
Y7	Y	7	882.456	882.457	0.000808533	0.916231
Y8	Y	8	969.488	969.487	-0.00122147	-1.25991
Y8	Y	8	969.488	969.488	-0.000221467	-0.228437
Y9	Y	9	1098.53	1098.53	0.000188533	0.171623
Y10	Y	10	1226.63	1226.63	0.00122853	1.00156
Y17	Y	17	2027.01	2027.02	0.00716853	3.53651
Y20	Y	20	2356.17	2356.18	0.0114885	4.87594
Y32	Y	32	3716.96	3716.97	0.0105985	2.8514
Name	Ion Type	Ion Number	Theoretical Mass	Observed Mass	Mass Difference (Da)	Mass Difference (ppm)
B8	B	8	942.477	942.477	-0.000326467	-0.346392
B9	B	9	1043.52	1043.53	0.00599353	5.74355
Y3	Y	3	360.201	360.201	-0.000151467	-0.420507
Y4	Y	4	497.26	497.26	-6.14669e-05	-0.123611		5076.69
Y8	Y	8	969.488	969.487	-0.00122147	-1.25991		Frag. 388-431
Y9	Y	9	1098.53	1098.53	0.00118853	1.08193		P14136 (GFAP_HUMAN)
Y10	Y	10	1226.63	1226.63	0.00322853	2.63204		QIRETSLDTKSVSEGHLKRNIVVKTVEMRDGEVIKESKQEHKDV
Y11	Y	11	1339.71	1339.71	0.00416853	3.11152
Y15	Y	15	1739.87	1739.87	0.00376853	2.16599
Y15	Y	15	1739.87	1739.88	0.00876853	5.03977
Name	Ion Type	Ion Number	Theoretical Mass	Observed Mass	Mass Difference (Da)	Mass Difference (ppm)
B6	B	6	715.35	715.349	-0.00134247	-1.87666
B7	B	7	828.434	828.432	-0.00240247	-2.90001
B8	B	8	943.461	943.46	-0.00134247	-1.42292
B9	B	9	1044.51	1044.51	0.00197753	1.89327
B22	B	22	2492.33	2492.33	5.75331e-05	0.023084
Y3	Y	3	360.201	360.201	-0.000151467	-0.420507
Y4	Y	4	497.26	497.26	-6.14669e-05	-0.123611		5077.67
Y8	Y	8	969.488	969.488	-0.000221467	-0.228437		Frag. 388-431
Y9	Y	9	1098.53	1098.53	-0.000811467	-0.738684		P14136 (GFAP_HUMAN)
Y10	Y	10	1226.63	1226.63	0.00122853	1.00156		(QIR)ETSLDTKSVSEGHLKRNIVVKTVEMRDGEVIKESKQEHKDV
Y11	Y	11	1339.71	1339.71	-0.000831467	-0.620632
Y12	Y	12	1438.78	1438.78	0.00475853	3.30734
Y14	Y	14	1624.84	1624.85	0.00570853	3.51329
Y15	Y	15	1739.87	1739.87	-0.00323147	-1.8573
Name	Ion Type	Ion Number	Theoretical Mass	Observed Mass	Mass Difference (Da)	Mass Difference (ppm)
B6	B	6	727.361	727.361	-0.000576467	-0.792545
B7	B	7	840.445	840.447	0.00136353	1.62239
B8	B	8	955.472	955.473	0.000423533	0.443271
B9	B	9	1042.5	1042.5	-0.000606467	-0.58174
B10	B	10	1155.59	1155.59	-0.00166647	-1.44209		5180.67
Y5	Y	5	627.25	627.25	-0.000281467	-0.448732		Frag. 422-466
Y6	Y	6	764.309	764.31	0.000808533	1.05786		P08670 (VIME_HUMAN)
Y8	Y	8	979.4	979.406	0.00619853	6.32891		NLRETNLDS LPLVDTHSKR TLLIKTVETR DGQVINETSQ HHDDLE
Y11	Y	11	1323.53	1323.53	-0.00100147	-0.756662
Y21	Y	21	2422.1	2422.12	0.0210785	8.70259
Y35	Y	35	4024.06	4024.07	0.00939853	2.33558
Name	Ion Type	Ion Number	Theoretical Mass	Observed Mass	Mass Difference (Da)	Mass Difference (ppm)
B2	B	2	228.111	228.111	-0.000282467	-1.23829
B5	B	5	614.302	614.302	-0.000662467	-1.07841
B6	B	6	728.345	728.345	-0.000592467	-0.813442
B7	B	7	841.429	841.43	0.000347533	0.413027
B8	B	8	956.456	956.456	-0.000592467	-0.61944
B9	B	9	1043.49	1043.49	-0.000622467	-0.596525
B10	B	10	1156.57	1156.57	-0.000682467	-0.590077
Y5	Y	5	627.25	627.25	-0.000281467	-0.448732
Y6	Y	6	764.309	764.309	-0.000191467	-0.25051
Y8	Y	8	979.4	979.4	0.000198533	0.202709		5181.65
Y9	Y	9	1080.45	1080.45	0.000518533	0.479925		Frag. 422-466
Y10	Y	10	1209.49	1209.49	-7.14669e-05	-0.0590885		P08670 (VIME_HUMAN)
Y11	Y	11	1323.53	1323.53	0.00199853	1.51		NLRETNLDS LPLVDTHSKR TLLIKTVETR DGQVINETSQ HHDDLE
Y12	Y	12	1436.62	1436.62	0.00293853	2.04545
Y20	Y	20	2321.05	2321.06	0.00975853	4.20436
Y21	Y	21	2422.1	2422.1	0.00207853	0.858153
Y22	Y	22	2550.19	2550.2	0.00711853	2.79137
Y23	Y	23	2663.28	2663.28	0.00305853	1.14841
Y31	Y	31	3599.83	3599.84	0.00756853	2.10247
Y32	Y	32	3714.86	3714.87	0.0126285	3.39947
Y33	Y	33	3813.92	3813.94	0.0182185	4.77685
Y35	Y	35	4024.06	4024.06	0.000398533	0.0990375
Name	Ion Type	Ion Number	Theoretical Mass	Observed Mass	Mass Difference (Da)	Mass Difference (ppm)
B6	B	6	728.345	728.345	-0.000576467	-0.791475
B7	B	7	841.429	841.428	-0.00163647	-1.94487
B8	B	8	956.456	956.456	-0.000576467	-0.602711
B9	B	9	1043.49	1043.49	-0.000606467	-0.581192
B10	B	10	1156.57	1156.57	-0.00166647	-1.44087		5182.64
Y5	Y	5	627.25	627.25	-0.000281467	-0.448732		Frag. 422-466
Y6	Y	6	764.309	764.309	-0.000191467	-0.25051		P08670 (VIME_HUMAN)
Y8	Y	8	979.4	979.401	0.00119853	1.22374		NLRETNLDS LPLVDTHSKR TLLIKTVETR DGQVINETSQ HHDDLE
Y9	Y	9	1080.45	1080.45	-0.000481467	-0.445618
Y10	Y	10	1209.49	1209.5	0.00992853	8.20886
Y11	Y	11	1323.53	1323.53	0.000998533	0.754445
Y12	Y	12	1436.62	1436.62	-0.00106147	-0.738866
Name	Ion Type	Ion Number	Theoretical Mass	Observed Mass	Mass Difference (Da)	Mass Difference (ppm)
B6	B	6	714.366	714.367	0.000673533	0.94284
B6	B	6	714.366	714.367	0.000673533	0.94284
B8	B	8	942.477	942.478	0.000673533	0.714641
B8	B	8	942.477	942.479	0.00167353	1.77568
B9	B	9	1043.52	1043.53	0.00399353	3.82697		5206.74
B10	B	10	1171.62	1171.63	0.00703353	6.00326		Frag: 388 –432
B21	B	21	2392.28	2392.29	0.00748353	3.1282		P14136 (GFAP_HUMAN)
B22	B	22	2491.35	2491.34	-0.00592647	-2.37882		QIR ETSLDTKSVSEGHLKRNIVV KTVEMRDGEV IKESKQEHKD VM
B22	B	22	2491.35	2491.35	0.00207353	0.832293
B22	B	22	2491.35	2491.35	0.00307353	1.23368
B32	B	32	3635.91	3635.91	0.00443353	1.21938
B34	B	34	3848.06	3848.02	-0.0370365	-9.62472
Y1	Y	1	149.051	149.051	-0.000331467	-2.22385
Y1	Y	1	149.051	149.051	-0.000331467	-2.22385
Y1	Y	1	149.051	149.051	-0.000331467	-2.22385
Y4	Y	4	491.241	491.242	0.000358533	0.729851
Y4	Y	4	491.241	491.242	0.000358533	0.729851
Y4	Y	4	491.241	491.242	0.000358533	0.729851
Y5	Y	5	628.3	628.299	-0.00155147	-2.46931
Y5	Y	5	628.3	628.299	-0.00155147	-2.46931
Y5	Y	5	628.3	628.3	-0.000551467	-0.877712
Y5	Y	5	628.3	628.3	-0.000551467	-0.877712
Y6	Y	6	757.343	757.346	0.00285853	3.77442
Y6	Y	6	757.343	757.347	0.00385853	5.09483
Y7	Y	7	885.401	885.403	0.00127853	1.44402
Y7	Y	7	885.401	885.405	0.00327853	3.70288
Y7	Y	7	885.401	885.406	0.00427853	4.83231
Y8	Y	8	1013.5	1013.5	0.00231853	2.28766
Y9	Y	9	1100.53	1100.53	-0.000711467	-0.646478
Y9	Y	9	1100.53	1100.53	0.00528853	4.80545
Y9	Y	9	1100.53	1100.53	0.00528853	4.80545
Y9	Y	9	1100.53	1100.53	0.00628853	5.7141
Y10	Y	10	1229.57	1229.57	0.00369853	3.00799
Y10	Y	10	1229.57	1229.58	0.00469853	3.82128
Y10	Y	10	1229.57	1229.58	0.00769853	6.26115
Y11	Y	11	1357.67	1357.67	0.00173853	1.28053
Y11	Y	11	1357.67	1357.67	0.00473853	3.49021
Y18	Y	18	2158.05	2158.06	0.00767853	3.55809
Y21	Y	21	2487.21	2487.22	0.00699853	2.81381
Y33	Y	33	3848	3848.02	0.0171085	4.44608
Name	Ion Type	Ion Number	Theoretical Mass	Observed Mass	Mass Difference (Da)	Mass Difference (ppm)
B7	B	7	828.434	828.433	-0.00138647	-1.6736
B8	B	8	943.461	943.46	-0.00132647	-1.40596
B9	B	9	1044.51	1044.51	-0.00200647	-1.92097
B10	B	10	1172.6	1172.6	3.35331e-05	0.0285971
B11	B	11	1259.64	1259.63	-0.000996467	-0.791075
B21	B	21	2393.27	2393.27	0.00348353	1.45556		5207.74
B23	B	23	2591.4	2591.41	0.00366353	1.41373		Frag. 388 –432
B32	B	32	3636.89	3636.89	0.00443353	1.21905		P14136 (GFAP_HUMAN)
Y1	Y	1	149.051	149.051	-0.000331467	-2.22385		(QIR) ETSLDTKSVSEGHLKRNIVV KTVEMRDGEV IKESKQEHKD VM
Y4	Y	4	491.241	491.242	0.000358533	0.729851
Y5	Y	5	628.3	628.299	-0.00155147	-2.46931
Y6	Y	6	757.343	757.343	-0.000141467	-0.186794
Y7	Y	7	885.401	885.401	-0.000721467	-0.814847
Y8	Y	8	1013.5	1013.49	-0.00168147	-1.65908
Y9	Y	9	1100.53	1100.53	0.000288533	0.262177
Y10	Y	10	1229.57	1229.57	-0.00130147	-1.05847
Y11	Y	11	1357.67	1357.67	0.00273853	2.01709
Name	Ion Type	Ion Number	Theoretical Mass	Observed Mass	Mass Difference (Da)	Mass Difference (ppm)
B6	B	6	715.35	715.349	-0.00132647	-1.85429
B7	B	7	828.434	828.433	-0.00138647	-1.6736
B8	B	8	943.461	943.459	-0.00232647	-2.46589		5208.72
B9	B	9	1044.51	1044.5	-0.00400647	-3.83574
B11	B	11	1259.64	1259.64	3.53312e-06	0.00280487		P14136 (GFAP_HUMAN)		Frag. 388 –432
B21	B	21	2393.27	2393.29	0.0194835	8.14098		(QIR) ETSLDTKSVSEGHLKRNIVV KTVEMRDGEV IKESKQEHKD VM
B22	B	22	2492.33	2492.33	-0.00592647	-2.37788
Y4	Y	4	491.241	491.241	-0.000641467	-1.30581		22 min
Y9	Y	9	1100.53	1100.53	-0.000711467	-0.646478
Y11	Y	11	1357.67	1357.66	-0.00126147	-0.929144
Y16	Y	16	1870.91	1870.91	0.00327853	1.75237
Name	Ion Type	Ion Number	Theoretical Mass	Observed Mass	Mass Difference (Da)	Mass Difference (ppm)
B6	B	6	715.35	715.35	-0.000326467	-0.456374
B7	B	7	828.434	828.433	-0.00138647	-1.6736
B8	B	8	943.461	943.461	-0.000326467	-0.346031
B11	B	11	1259.64	1259.64	3.53312e-06	0.00280487
B17	B	17	1881.94	1881.95	0.00354353	1.88291
Y4	Y	4	491.241	491.241	-0.000641467	-1.30581		5209.69
Y5	Y	5	628.3	628.299	-0.00155147	-2.46931		Frag. 388 –432
Y9	Y	9	1100.53	1100.53	0.000288533	0.262177		P14136 (GFAP_HUMAN)
Y10	Y	10	1229.57	1229.57	0.00369853	3.00799		(QIR) ETSLDTKSVSEGHLKRNIVV KTVEMRDGEV IKESKQEHKD VM
Y11	Y	11	1357.67	1357.67	-0.000261467	-0.192586
Y12	Y	12	1470.75	1470.75	0.00267853	1.8212
Y16	Y	16	1870.91	1870.91	0.00427853	2.28687
Name	Ion Type	Ion Number	Theoretical Mass	Observed Mass	Mass Difference (Da)	Mass Difference (ppm)
B6	B	6	612.323	612.325	0.00160353	2.61877
B15	B	15	1624.88	1624.89	0.00797353	4.90715
B18	B	18	1896.99	1897.01	0.0139035	7.32925
Y22	Y	22	2374.33	2374.33	0.00119853	0.504788		5305.81
Y23	Y	23	2489.36	2489.36	0.000258533	0.103855		Frag. 521-570
Y24	Y	24	2604.38	2604.39	0.00631853	2.42611		Q16555 (DPYL2_HUMAN)
Y25	Y	25	2717.47	2717.47	0.00525853	1.93509
Y26	Y	26	2845.53	2845.53	-0.00132147	-0.464401
Y27	Y	27	2916.56	2916.57	0.00656853	2.25215
Y28	Y	28	2973.59	2973.58	-0.00189147	-0.63609
Y29	Y	29	3060.62	3060.62	0.00207853	0.679122
Y30	Y	30	3173.7	3173.7	0.00301853	0.951108
Y31	Y	31	3260.73	3260.73	-0.00101147	-0.310196
Y34	Y	34	3551.86	3551.86	0.00208853	0.588012
Y42	Y	42	4493.38	4493.38	0.00456853	1.01673
Name	Ion Type	Ion Number	Theoretical Mass	Observed Mass	Mass Difference (Da)	Mass Difference (ppm)
B2	B	2	188.08	188.08	1.35331e-05	0.0719542
B6	B	6	612.323	612.325	0.00160353	2.61877
B11	B	11	1104.59	1104.59	-0.00301647	-2.73084
B15	B	15	1624.88	1624.88	0.00497353	3.06086
B16	B	16	1752.94	1752.94	-0.000606467	-0.345972
B18	B	18	1896.99	1897	0.00490353	2.5849
B19	B	19	2044.06	2044.07	0.00549353	2.68756
B20	B	20	2131.09	2131.1	0.0104635	4.90994		5475.92
Y2	Y	2	188.116	188.116	-0.000361467	-1.92151		Frag. 521-572
Y3	Y	3	275.148	275.149	0.000608533	2.21166		Q16555 (DPYL2_HUMAN)
Y10	Y	10	944.504	944.507	0.00279853	2.96297
Y12	Y	12	1138.61	1138.61	-0.000721467	-0.633639
Y22	Y	22	2317.31	2317.32	0.0156685	6.76152
Y24	Y	24	2544.44	2544.44	0.00167853	0.659688
Y25	Y	25	2659.46	2659.47	0.00273853	1.02973
Y26	Y	26	2774.49	2774.49	0.000798533	0.287813
Y27	Y	27	2887.57	2887.59	0.0117385	4.06519
Y30	Y	30	3143.69	3143.69	0.000588533	0.187211
Y31	Y	31	3230.72	3230.73	0.00355853	1.10147
Y32	Y	32	3343.81	3343.8	-0.00650147	-1.94433
Y33	Y	33	3430.84	3430.83	-0.00453147	-1.3208
Y44	Y	44	4663.48	4663.49	0.0130485	2.79802
Name	Ion Type	Ion Number	Theoretical Mass	Observed Mass	Mass Difference (Da)	Mass Difference (ppm)
B2	B	2	196.121	196.122	0.000553533	2.8224
B3	B	3	293.174	293.174	-0.000206467	-0.704247
B5	B	5	520.301	520.301	-0.000196467	-0.377602
B5	B	5	520.301	520.302	0.000803533	1.54436
Y1	Y	1	146.106	146.106	0.000198533	1.35883
Y2	Y	2	259.19	259.19	0.000138533	0.534486
Y4	Y	4	459.306	459.306	4.85331e-05	0.105666		7798.3
Y4	Y	4	459.306	459.306	4.85331e-05	0.105666		ATP synthase subunit e, mitochondrial
Y5	Y	5	574.333	574.333	0.000108533	0.188973
Y17	Y	17	1998.11	1998.11	0.000818533	0.409653
Y20	Y	20	2369.29	2369.29	-0.00366147	-1.54538
Y46	Y	46	5462.9	5462.94	0.0395785	7.24496
Y48	Y	48	5618.99	5618.98	-0.0112915	-2.00952
Y58	Y	58	6767.66	6767.68	0.0181185	2.67722
Y61	Y	61	7090.88	7090.9	0.0172385	2.43108
Y62	Y	62	7177.92	7177.94	0.0212085	2.95469
Name	Ion Type	Ion Number	Theoretical Mass	Observed Mass	Mass Difference (Da)	Mass Difference (ppm)
B2	B	2	259.099	259.1	0.000653533	2.52233
B2	B	2	259.099	259.1	0.000653533	2.52233
B2	B	2	259.099	259.1	0.000653533	2.52233
B2	B	2	259.099	259.1	0.000653533	2.52233
B3	B	3	372.183	372.184	0.000593533	1.59473
B3	B	3	372.183	372.184	0.000593533	1.59473
B3	B	3	372.183	372.184	0.000593533	1.59473
B3	B	3	372.183	372.184	0.000593533	1.59473
B4	B	4	519.252	519.252	0.000183533	0.353457		8446.59
B4	B	4	519.252	519.252	0.000183533	0.353457		B4DV12 (B4DV12_HUMAN)
B4	B	4	519.252	519.252	0.000183533	0.353457		Ubiquitin des-GG (C-terminal)
B4	B	4	519.252	519.253	0.00118353	2.27931
B5	B	5	618.32	618.321	0.000773533	1.25102
B5	B	5	618.32	618.321	0.000773533	1.25102
B5	B	5	618.32	618.321	0.000773533	1.25102
B5	B	5	618.32	618.321	0.000773533	1.25102
B7	B	7	847.463	847.464	0.00113353	1.33756
B7	B	7	847.463	847.464	0.00113353	1.33756
B7	B	7	847.463	847.465	0.00213353	2.51755
B7	B	7	847.463	847.465	0.00213353	2.51755
B8	B	8	960.547	960.55	0.00307353	3.19977
B8	B	8	960.547	960.551	0.00407353	4.24085
B9	B	9	1061.59	1061.6	0.00239353	2.25466
B9	B	9	1061.59	1061.6	0.00239353	2.25466
B9	B	9	1061.59	1061.6	0.00439353	4.13862
B12	B	12	1347.76	1347.76	0.000293533	0.217794
B12	B	12	1347.76	1347.76	0.00229353	1.70174
B12	B	12	1347.76	1347.76	0.00429353	3.18568
B14	B	14	1561.89	1561.9	0.00755353	4.83615
B15	B	15	1674.97	1674.98	0.00449353	2.68275
B16	B	16	1804.02	1804.02	0.00390353	2.1638
B16	B	16	1804.02	1804.02	0.00790353	4.38108
Y4	Y	4	556.381	556.381	-0.000181467	-0.326156
Y5	Y	5	655.449	655.45	0.000408533	0.623287
Y5	Y	5	655.449	655.45	0.000408533	0.623287
Y5	Y	5	655.449	655.45	0.000408533	0.623287
Y5	Y	5	655.449	655.451	0.00140853	2.14896
Y6	Y	6	768.533	768.534	0.000348533	0.453504
Y6	Y	6	768.533	768.534	0.000348533	0.453504
Y6	Y	6	768.533	768.534	0.000348533	0.453504
Y6	Y	6	768.533	768.535	0.00134853	1.75468
Y7	Y	7	905.592	905.593	0.000438533	0.48425
Y7	Y	7	905.592	905.594	0.00143853	1.5885
Y7	Y	7	905.592	905.594	0.00143853	1.5885
Y7	Y	7	905.592	905.594	0.00143853	1.5885
Y8	Y	8	1018.68	1018.68	0.000378533	0.371593
Y8	Y	8	1018.68	1018.68	0.000378533	0.371593
Y8	Y	8	1018.68	1018.68	0.00137853	1.35326
Y9	Y	9	1119.72	1119.72	0.000698533	0.623844
Y9	Y	9	1119.72	1119.73	0.00169853	1.51692
Y9	Y	9	1119.72	1119.73	0.00169853	1.51692
Y9	Y	9	1119.72	1119.73	0.00269853	2.41
Y10	Y	10	1206.76	1206.76	0.000668533	0.553992
Y10	Y	10	1206.76	1206.76	0.000668533	0.553992
Y10	Y	10	1206.76	1206.76	0.00166853	1.38266
Y10	Y	10	1206.76	1206.76	0.00166853	1.38266
Y11	Y	11	1335.8	1335.8	0.00107853	0.807407
Y11	Y	11	1335.8	1335.8	0.00107853	0.807407
Y11	Y	11	1335.8	1335.8	0.00107853	0.807407
Y11	Y	11	1335.8	1335.8	0.00107853	0.807407
Y12	Y	12	1463.89	1463.89	0.000118533	0.0809711
Y12	Y	12	1463.89	1463.89	0.000118533	0.0809711
Y12	Y	12	1463.89	1463.89	0.000118533	0.0809711
Y12	Y	12	1463.89	1463.89	0.00111853	0.764081
Y13	Y	13	1591.95	1591.95	-0.000461467	-0.289875
Y13	Y	13	1591.95	1591.95	0.000538533	0.338285
Y13	Y	13	1591.95	1591.95	0.000538533	0.338285
Y13	Y	13	1591.95	1591.95	0.000538533	0.338285
Y14	Y	14	1705.04	1705.04	0.00147853	0.867156
Y14	Y	14	1705.04	1705.04	0.00147853	0.867156
Y14	Y	14	1705.04	1705.04	0.00147853	0.867156
Y14	Y	14	1705.04	1705.04	0.00247853	1.45365
Y15	Y	15	1819.08	1819.08	0.00354853	1.95073
Y15	Y	15	1819.08	1819.09	0.00754853	4.14965
Y16	Y	16	1982.14	1982.14	-0.000781467	-0.394254
Y16	Y	16	1982.14	1982.14	0.00121853	0.614756
Y16	Y	16	1982.14	1982.14	0.00121853	0.614756
Y18	Y	18	2184.2	2184.21	0.0102485	4.69212
Y18	Y	18	2184.2	2184.21	0.0132485	6.06562
Y20	Y	20	2398.33	2398.34	0.0105085	4.3816
Y20	Y	20	2398.33	2398.35	0.0125085	5.21551
Y22	Y	22	2611.46	2611.46	0.00193853	0.742319
Y22	Y	22	2611.46	2611.46	0.00293853	1.12525
Y22	Y	22	2611.46	2611.46	0.00493853	1.8911
Y22	Y	22	2611.46	2611.47	0.00993853	3.80574
Y23	Y	23	2726.48	2726.49	0.00999853	3.66719
Y24	Y	24	2855.53	2855.53	0.00540853	1.89406
Y24	Y	24	2855.53	2855.53	0.00940853	3.29485
Y24	Y	24	2855.53	2855.54	0.0124085	4.34545
Y25	Y	25	2968.61	2968.62	0.00634853	2.13855
Y25	Y	25	2968.61	2968.62	0.00634853	2.13855
Y25	Y	25	2968.61	2968.62	0.00834853	2.81227
Y25	Y	25	2968.61	2968.62	0.0103485	3.48599
Y26	Y	26	3096.67	3096.68	0.0117685	3.80039
Y26	Y	26	3096.67	3096.68	0.0127685	4.12331
Y26	Y	26	3096.67	3096.69	0.0207685	6.70674
Y28	Y	28	3281.78	3281.81	0.0253485	7.72401
Y29	Y	29	3352.82	3352.84	0.0182385	5.43976
Y35	Y	35	4138.28	4138.28	0.00343853	0.83091
Y35	Y	35	4138.28	4138.29	0.00943853	2.28079
Y35	Y	35	4138.28	4138.29	0.0104385	2.52244
Y35	Y	35	4138.28	4138.29	0.0124385	3.00573
Y37	Y	37	4350.36	4350.36	0.00773853	1.77883
Y37	Y	37	4350.36	4350.36	0.00773853	1.77883
Y37	Y	37	4350.36	4350.36	0.00873853	2.00869
Y37	Y	37	4350.36	4350.37	0.0157385	3.61776
Y38	Y	38	4447.41	4447.41	-0.00202147	-0.454527
Y38	Y	38	4447.41	4447.41	-0.00202147	-0.454527
Y38	Y	38	4447.41	4447.41	0.00197853	0.444873
Y38	Y	38	4447.41	4447.42	0.0159785	3.59277
Y40	Y	40	4617.51	4617.53	0.0174585	3.78094
Y41	Y	41	4746.56	4746.59	0.0348685	7.34607
Name	Ion Type	Ion Number	Theoretical Mass	Observed Mass	Mass Difference (Da)	Mass Difference (ppm)
B2	B	2	259.099	259.1	0.000653533	2.52233
B2	B	2	259.099	259.1	0.000653533	2.52233
B2	B	2	259.099	259.1	0.000653533	2.52233
B3	B	3	372.183	372.184	0.000593533	1.59473
B3	B	3	372.183	372.184	0.000593533	1.59473
B3	B	3	372.183	372.184	0.000593533	1.59473
B4	B	4	519.252	519.252	0.000183533	0.353457
B4	B	4	519.252	519.252	0.000183533	0.353457
B4	B	4	519.252	519.253	0.00118353	2.27931		8560.64
B5	B	5	618.32	618.32	-0.000226467	-0.366262
B5	B	5	618.32	618.32	-0.000226467	-0.366262		B4DV12 (B4DV12_HUMAN)
B5	B	5	618.32	618.321	0.000773533	1.25102		Ubiquitin
B7	B	7	847.463	847.464	0.00113353	1.33756
B8	B	8	960.547	960.55	0.00307353	3.19977
B9	B	9	1061.59	1061.6	0.00239353	2.25466
B9	B	9	1061.59	1061.6	0.00539353	5.0806
B9	B	9	1061.59	1061.6	0.00539353	5.0806
B10	B	10	1118.62	1118.62	0.000933533	0.834543
B12	B	12	1347.76	1347.76	0.00129353	0.959766
B12	B	12	1347.76	1347.76	0.00229353	1.70174
B16	B	16	1804.02	1804.02	0.00490353	2.71812
Y8	Y	8	882.576	882.577	0.000428533	0.485548
Y8	Y	8	882.576	882.579	0.00242853	2.75164
Y8	Y	8	882.576	882.58	0.00342853	3.88469
Y9	Y	9	1019.64	1019.64	0.000518533	0.508548
Y9	Y	9	1019.64	1019.64	0.000518533	0.508548
Y9	Y	9	1019.64	1019.64	0.00151853	1.48929
Y10	Y	10	1132.72	1132.72	0.00145853	1.28764
Y10	Y	10	1132.72	1132.72	0.00245853	2.17047
Y10	Y	10	1132.72	1132.72	0.00245853	2.17047
Y11	Y	11	1233.77	1233.77	0.000778533	0.631021
Y11	Y	11	1233.77	1233.77	0.000778533	0.631021
Y11	Y	11	1233.77	1233.77	0.00177853	1.44155
Y12	Y	12	1320.8	1320.8	0.00174853	1.32385
Y12	Y	12	1320.8	1320.8	0.00174853	1.32385
Y12	Y	12	1320.8	1320.8	0.00174853	1.32385
Y13	Y	13	1449.84	1449.84	0.00215853	1.48881
Y13	Y	13	1449.84	1449.84	0.00215853	1.48881
Y13	Y	13	1449.84	1449.84	0.00215853	1.48881
Y14	Y	14	1577.94	1577.94	0.00119853	0.759557
Y14	Y	14	1577.94	1577.94	0.00119853	0.759557
Y14	Y	14	1577.94	1577.94	0.00219853	1.3933
Y15	Y	15	1706	1706	0.00161853	0.948733
Y15	Y	15	1706	1706	0.00261853	1.5349
Y15	Y	15	1706	1706	0.00261853	1.5349
Y16	Y	16	1819.08	1819.08	0.00555853	3.05569
Y16	Y	16	1819.08	1819.09	0.00755853	4.15514
Y16	Y	16	1819.08	1819.09	0.00755853	4.15514
Y17	Y	17	1933.12	1933.13	0.00762853	3.94622
Y18	Y	18	2096.19	2096.19	0.00229853	1.09653
Y18	Y	18	2096.19	2096.19	0.00229853	1.09653
Y18	Y	18	2096.19	2096.19	0.00329853	1.57359
Y22	Y	22	2512.38	2512.38	0.00758853	3.02046
Y24	Y	24	2725.5	2725.5	0.00301853	1.10752
Y24	Y	24	2725.5	2725.5	0.00401853	1.47442
Y24	Y	24	2725.5	2725.5	0.00401853	1.47442
Y26	Y	26	2969.57	2969.57	0.00648853	2.18501
Y27	Y	27	3082.65	3082.66	0.00542853	1.76099
Y27	Y	27	3082.65	3082.66	0.00742853	2.40979
Y27	Y	27	3082.65	3082.66	0.0124285	4.03177
Y28	Y	28	3210.71	3210.71	-0.00515147	-1.60446
Y28	Y	28	3210.71	3210.71	0.000848533	0.264282
Y28	Y	28	3210.71	3210.71	0.000848533	0.264282
Y37	Y	37	4252.32	4252.32	0.00551853	1.29777
Y37	Y	37	4252.32	4252.33	0.00751853	1.7681
Y37	Y	37	4252.32	4252.35	0.0265185	6.23625
Y39	Y	39	4464.4	4464.4	0.00581853	1.30332
Y39	Y	39	4464.4	4464.41	0.00881853	1.9753
Y39	Y	39	4464.4	4464.41	0.0108185	2.42329
Y40	Y	40	4561.45	4561.45	-0.00194147	-0.425625
Y40	Y	40	4561.45	4561.45	0.00105853	0.232061
Y40	Y	40	4561.45	4561.46	0.0120585	2.64357
Y42	Y	42	4731.56	4731.56	0.00153853	0.325164
Y42	Y	42	4731.56	4731.59	0.0325385	6.87692
Y43	Y	43	4860.6	4860.61	0.0109485	2.25251
Y43	Y	43	4860.6	4860.61	0.0149485	3.07545
Name	Ion Type	Ion Number	Theoretical Mass	Observed Mass	Mass Difference (Da)	Mass Difference (ppm)
B2	B	2	242.138	242.138	-0.000166467	-0.687488
B2	B	2	242.138	242.138	-0.000166467	-0.687488
B3	B	3	371.18	371.181	0.000243533	0.656104
B3	B	3	371.18	371.181	0.000243533	0.656104
B4	B	4	484.265	484.265	0.000183533	0.378994
B4	B	4	484.265	484.265	0.000183533	0.378994
B5	B	5	599.291	599.292	0.000243533	0.406368
B5	B	5	599.291	599.293	0.00124353	2.07501
B6	B	6	696.344	696.346	0.00148353	2.13046
B8	B	8	937.487	937.49	0.00284353	3.03314
B8	B	8	937.487	937.491	0.00384353	4.09983		8955.48
B27	B	27	3158.72	3158.72	0.00474353	1.50173
B27	B	27	3158.72	3158.73	0.0147435	4.66757		P18859 (ATP5J_HUMAN)
Y3	Y	3	314.159	314.16	0.000708533	2.25533		ATP synthase-coupling factor 6, mitochondrial
Y3	Y	3	314.159	314.16	0.000708533	2.25533
Y4	Y	4	442.254	442.255	0.000748533	1.69254
Y4	Y	4	442.254	442.255	0.000748533	1.69254
Y5	Y	5	571.297	571.297	0.000158533	0.277497
Y5	Y	5	571.297	571.298	0.00115853	2.0279
Y6	Y	6	684.381	684.381	9.85331e-05	0.143974
Y6	Y	6	684.381	684.382	0.00109853	1.60515
Y7	Y	7	783.449	783.451	0.00168853	2.15526
Y7	Y	7	783.449	783.452	0.00268853	3.43166
Y8	Y	8	912.492	912.493	0.00109853	1.20388
Y8	Y	8	912.492	912.493	0.00109853	1.20388
Y9	Y	9	1059.56	1059.56	0.000688533	0.649829
Y11	Y	11	1284.71	1284.71	0.00196853	1.53228
Y11	Y	11	1284.71	1284.71	0.00196853	1.53228
Y18	Y	18	2149.11	2149.11	-0.000781467	-0.363624
Y18	Y	18	2149.11	2149.11	0.00321853	1.49761
Name	Ion Type	Ion Number	Theoretical Mass	Observed Mass	Mass Difference (Da)	Mass Difference (ppm)
B2	B	2	225.148	225.148	3.53312e-06	0.0156925
B6	B	6	709.423	709.426	0.00223353	3.14838
B8	B	8	881.472	881.471	-0.00116647	-1.32332
B9	B	9	952.509	952.515	0.00572353	6.0089
B10	B	10	1080.6	1080.6	0.000763533	0.70658
B11	B	11	1137.63	1137.63	0.00230353	2.02486
B12	B	12	1252.65	1252.65	-0.000636467	-0.508095
B13	B	13	1380.75	1380.75	0.00140353	1.0165
B14	B	14	1451.78	1451.79	0.00229353	1.5798
B15	B	15	1579.88	1579.88	0.00333353	2.10999
B18	B	18	1922.07	1922.07	2.35331e-05	0.0122436		9258.02
B30	B	30	3301.84	3301.87	0.0224635	6.80333		P05204 (HMGN2_HUMAN)
B32	B	32	3469.93	3469.94	0.00759353	2.18838		Non-histone chromosomal protein HMG-17
B33	B	33	3566.99	3567	0.00983353	2.75682
B35	B	35	3792.13	3792.13	-0.00488647	-1.28858
B37	B	37	4018.23	4018.25	0.0177635	4.42074
Y2	Y	2	217.143	217.143	8.85331e-05	0.407719
Y4	Y	4	389.191	389.192	0.000688533	1.76914
Y6	Y	6	517.25	517.25	0.000118533	0.22916
Y7	Y	7	646.292	646.293	0.000528533	0.817793
Y8	Y	8	717.329	717.33	0.000418533	0.58346
Y9	Y	9	845.424	845.426	0.00145853	1.72521
Y11	Y	11	1044.52	1044.52	0.00176853	1.69315
Y13	Y	13	1287.61	1287.61	0.00124853	0.969655
Y14	Y	14	1388.65	1388.65	0.000568533	0.409413
Y16	Y	16	1587.79	1587.79	0.00249853	1.5736
Y18	Y	18	1759.83	1759.84	0.00409853	2.32893
Y20	Y	20	2003.9	2003.91	0.00256253	1.27877
Y22	Y	22	2171.99	2172	0.00569253	2.62088
Name	Ion Type	Ion Number	Theoretical Mass	Observed Mass	Mass Difference (Da)	Mass Difference (ppm)
B1	B	1	129.043	129.043	0.000128533	0.996052
B2	B	2	257.101	257.102	0.000548533	2.13353
B3	B	3	328.138	328.139	0.000438533	1.33643
B4	B	4	457.181	457.182	0.000848533	1.85601
B4	B	4	457.181	457.183	0.00184853	4.04333
B13	B	13	1516.72	1516.72	0.00196853	1.29789
B23	B	23	2681.29	2681.3	0.00448853	1.67402
B23	B	23	2681.29	2681.3	0.00748853	2.79288
B24	B	24	2812.33	2812.34	0.00199853	0.710632
B24	B	24	2812.33	2812.34	0.00599853	2.13294
B25	B	25	2925.42	2925.42	0.00593853	2.02998		9918.04
B25	B	25	2925.42	2925.44	0.0199385	6.81562
Y2	Y	2	188.116	188.117	0.000638533	3.39436		P07108 (ACBP_HUMAN)
Y4	Y	4	479.274	479.275	0.000348533	0.72721		AcylCoA Binding Protein Natural Variant M71®V
Y5	Y	5	607.369	607.37	0.000388533	0.639698
Y5	Y	5	607.369	607.374	0.00438853	7.22548
Y6	Y	6	735.464	735.465	0.000428533	0.58267
Y6	Y	6	735.464	735.466	0.00142853	1.94236
Y6	Y	6	735.464	735.47	0.00542853	7.3811
Y7	Y	7	848.548	848.55	0.00136853	1.61279
Y7	Y	7	848.548	848.551	0.00236853	2.79128
Y7	Y	7	848.548	848.552	0.00336853	3.96976
Y7	Y	7	848.548	848.554	0.00536853	6.32673
Y7	Y	7	848.548	848.555	0.00636853	7.50521
Y8	Y	8	977.591	977.593	0.00177853	1.8193
Y8	Y	8	977.591	977.596	0.00477853	4.88807
Y8	Y	8	977.591	977.599	0.00777853	7.95684
Y9	Y	9	1106.63	1106.63	0.000188533	0.170366
Y9	Y	9	1106.63	1106.64	0.00518853	4.68857
Y9	Y	9	1106.63	1106.64	0.00618853	5.59222
Y10	Y	10	1205.7	1205.7	0.00177853	1.4751
Y10	Y	10	1205.7	1205.71	0.00577853	4.79267
Y10	Y	10	1205.7	1205.71	0.0107785	8.93963
Y11	Y	11	1333.8	1333.8	0.00781853	5.86186
Y11	Y	11	1333.8	1333.81	0.00881853	6.6116
Y12	Y	12	1447.84	1447.84	0.00388853	2.68575
Y12	Y	12	1447.84	1447.84	0.00488853	3.37643
Y12	Y	12	1447.84	1447.85	0.00788853	5.44848
Y12	Y	12	1447.84	1447.85	0.00988853	6.82985
Y13	Y	13	1560.92	1560.93	0.00682853	4.37467
Y13	Y	13	1560.92	1560.93	0.00782853	5.01532
Y14	Y	14	1723.99	1723.99	0.00449853	2.60938
Y14	Y	14	1723.99	1724	0.0114985	6.66973
Y15	Y	15	1795.02	1795.03	0.00438853	2.44483
Y15	Y	15	1795.02	1795.04	0.0173885	9.68707
Y16	Y	16	1923.12	1923.12	0.00542853	2.82278
Y16	Y	16	1923.12	1923.14	0.0184285	9.58263
Y24	Y	24	2710.49	2710.51	0.0182485	6.73256
Y24	Y	24	2710.49	2710.51	0.0202485	7.47043
Name	Ion Type	Ion Number	Theoretical Mass	Observed Mass	Mass Difference (Da)	Mass Difference (ppm)
B1	B	1	129.043	129.043	0.000128533	0.996052
B2	B	2	257.101	257.102	0.000548533	2.13353
B3	B	3	328.138	328.139	0.000438533	1.33643
B3	B	3	328.138	328.139	0.000438533	1.33643
B4	B	4	457.181	457.182	0.000848533	1.85601
B4	B	4	457.181	457.183	0.00184853	4.04333
B4	B	4	457.181	457.183	0.00184853	4.04333
B5	B	5	604.249	604.253	0.00343853	5.69059
B22	B	22	2552.25	2552.27	0.0150785	5.90794
B23	B	23	2681.29	2681.3	0.00448853	1.67402		9950.03
B24	B	24	2812.33	2812.33	-0.00600147	-2.13398
Y2	Y	2	188.116	188.117	0.000638533	3.39436		P07108 (ACBP_HUMAN)
Y3	Y	3	351.179	351.18	0.000308533	0.878563		AcylCoA Binding Protein
Y4	Y	4	479.274	479.275	0.000348533	0.72721
Y4	Y	4	479.274	479.275	0.000348533	0.72721
Y4	Y	4	479.274	479.276	0.00134853	2.8137
Y4	Y	4	479.274	479.276	0.00134853	2.8137
Y5	Y	5	607.369	607.37	0.000388533	0.639698
Y5	Y	5	607.369	607.37	0.000388533	0.639698
Y5	Y	5	607.369	607.371	0.00138853	2.28614
Y5	Y	5	607.369	607.372	0.00238853	3.93259
Y6	Y	6	735.464	735.466	0.00142853	1.94236
Y6	Y	6	735.464	735.466	0.00142853	1.94236
Y6	Y	6	735.464	735.468	0.00342853	4.66173
Y6	Y	6	735.464	735.468	0.00342853	4.66173
Y7	Y	7	848.548	848.55	0.00136853	1.61279
Y7	Y	7	848.548	848.551	0.00236853	2.79128
Y8	Y	8	977.591	977.593	0.00177853	1.8193
Y8	Y	8	977.591	977.599	0.00777853	7.95684
Y9	Y	9	1106.63	1106.64	0.00218853	1.97765
Y10	Y	10	1205.7	1205.7	0.00277853	2.30449
Y10	Y	10	1205.7	1205.71	0.00477853	3.96328
Y11	Y	11	1333.8	1333.8	0.00281853	2.11317
Y12	Y	12	1447.84	1447.84	0.00188853	1.30438
Y12	Y	12	1447.84	1447.84	0.00388853	2.68575
Y12	Y	12	1447.84	1447.85	0.0108885	7.52054
Y12	Y	12	1447.84	1447.85	0.0128885	8.90191
Y13	Y	13	1560.92	1560.93	0.00382853	2.45274
Y14	Y	14	1723.99	1723.99	0.00449853	2.60938
Y14	Y	14	1723.99	1724	0.0114985	6.66973
Y15	Y	15	1795.02	1795.03	0.00138853	0.773546
Y15	Y	15	1795.02	1795.03	0.00238853	1.33064
Y15	Y	15	1795.02	1795.04	0.0153885	8.57288
Y16	Y	16	1923.12	1923.13	0.0114285	5.94271
Y25	Y	25	2870.56	2870.58	0.0202085	7.03993
Name	Ion Type	Ion Number	Theoretical Mass	Observed Mass	Mass Difference (Da)	Mass Difference (ppm)
B1	B	1	113.048	113.048	1.35331e-05	0.119712
B1	B	1	113.048	113.048	1.35331e-05	0.119712
Y1	Y	1	131.095	131.095	9.85331e-05	0.751618
Y2	Y	2	259.19	259.19	0.000138533	0.534486
Y2	Y	2	259.19	259.19	0.000138533	0.534486
Y2	Y	2	259.19	259.19	0.000138533	0.534486
Y3	Y	3	316.211	316.212	0.000678533	2.14582
Y4	Y	4	413.264	413.264	-8.14669e-05	-0.19713
Y4	Y	4	413.264	413.264	-8.14669e-05	-0.19713
Y4	Y	4	413.264	413.264	-8.14669e-05	-0.19713
Y7	Y	7	718.401	718.407	0.00536853	7.47289
Y11	Y	11	1202.64	1202.65	0.00497853	4.13967		10093.7
Y12	Y	12	1331.68	1331.69	0.00538853	4.04641
Y13	Y	13	1446.71	1446.71	0.000448533	0.310037		P14854 (CX6B1_HUMAN)
Y14	Y	14	1632.79	1632.79	0.00113853	0.697293		Cytochrome c oxidase subunit 6B1
Y15	Y	15	1747.82	1747.82	0.00319853	1.83002
Y16	Y	16	1848.86	1848.87	0.00351853	1.90308
Name	Ion Type	Ion Number	Theoretical Mass	Observed Mass	Mass Difference (Da)	Mass Difference (ppm)
B1	B	1	129.043	129.043	0.000128533	0.996052
B2	B	2	258.085	258.085	-0.000461467	-1.78804
B2	B	2	258.085	258.085	-0.000461467	-1.78804
B2	B	2	258.085	258.085	-0.000461467	-1.78804
B2	B	2	258.085	258.086	0.000538533	2.08665
B3	B	3	371.169	371.169	-0.000521467	-1.40493
B3	B	3	371.169	371.169	-0.000521467	-1.40493
B3	B	3	371.169	371.17	0.000478533	1.28926		10618
B3	B	3	371.169	371.17	0.000478533	1.28926
B4	B	4	500.212	500.212	-0.000111467	-0.222839		P04271 (S100B_HUMAN)
B4	B	4	500.212	500.212	-0.000111467	-0.222839		Protein S100-B
B4	B	4	500.212	500.212	-0.000111467	-0.222839
B4	B	4	500.212	500.213	0.000888533	1.77631
B7	B	7	830.384	830.384	-0.000671467	-0.808622
B7	B	7	830.384	830.385	0.000328533	0.39564
B7	B	7	830.384	830.385	0.000328533	0.39564
B7	B	7	830.384	830.386	0.00132853	1.5999
B8	B	8	929.453	929.454	0.000918533	0.988251
B8	B	8	929.453	929.458	0.00491853	5.29186
B8	B	8	929.453	929.46	0.00691853	7.44366
B9	B	9	1000.49	1000.49	-0.000191467	-0.191373
B9	B	9	1000.49	1000.49	0.000808533	0.808137
B9	B	9	1000.49	1000.49	0.00280853	2.80716
B9	B	9	1000.49	1000.5	0.00580853	5.80569
B10	B	10	1113.57	1113.57	0.000748533	0.67219
B10	B	10	1113.57	1113.58	0.00574853	5.16224
B10	B	10	1113.57	1113.58	0.00674853	6.06025
B10	B	10	1113.57	1113.58	0.00674853	6.06025
B12	B	12	1341.68	1341.69	0.00574853	4.28456
B33	B	33	3837.02	3837.05	0.0240685	6.27271
B35	B	35	4079.15	4079.18	0.0314185	7.70222
Y2	Y	2	284.112	284.112	-0.000341467	-1.20187
Y2	Y	2	284.112	284.112	-0.000341467	-1.20187
Y2	Y	2	284.112	284.112	-0.000341467	-1.20187
Y2	Y	2	284.112	284.113	0.000658533	2.31786
Y4	Y	4	560.223	560.223	-0.000341467	-0.609519
Y4	Y	4	560.223	560.223	-0.000341467	-0.609519
Y4	Y	4	560.223	560.224	0.000658533	1.17548
Y5	Y	5	707.291	707.291	-0.000751467	-1.06246
Y5	Y	5	707.291	707.292	0.000248533	0.351387
Y5	Y	5	707.291	707.292	0.000248533	0.351387
Y5	Y	5	707.291	707.292	0.000248533	0.351387
Y6	Y	6	836.334	836.334	-0.000341467	-0.40829
Y6	Y	6	836.334	836.334	-0.000341467	-0.40829
Y6	Y	6	836.334	836.336	0.00165853	1.9831
Y6	Y	6	836.334	836.336	0.00165853	1.9831
Y7	Y	7	973.393	973.392	-0.00125147	-1.28567
Y7	Y	7	973.393	973.394	0.000748533	0.768994
Y7	Y	7	973.393	973.395	0.00174853	1.79633
Y7	Y	7	973.393	973.397	0.00374853	3.851
Y8	Y	8	1076.4	1076.4	-0.000441467	-0.410132
Y8	Y	8	1076.4	1076.4	0.00155853	1.44791
Y8	Y	8	1076.4	1076.41	0.00455853	4.23497
Y9	Y	9	1147.44	1147.44	-0.000551467	-0.480607
Y9	Y	9	1147.44	1147.44	0.00444853	3.87692
Y9	Y	9	1147.44	1147.45	0.00644853	5.61993
Y10	Y	10	1248.49	1248.49	0.00276853	2.21751
Y10	Y	10	1248.49	1248.49	0.00676853	5.42139
Y10	Y	10	1248.49	1248.5	0.00876853	7.02333
Y10	Y	10	1248.49	1248.5	0.0117685	9.42624
Y11	Y	11	1349.53	1349.53	8.85331e-05	0.0656027
Y11	Y	11	1349.53	1349.54	0.00508853	3.77058
Y11	Y	11	1349.53	1349.54	0.00608853	4.51158
Y11	Y	11	1349.53	1349.54	0.00908853	6.73457
Y12	Y	12	1448.6	1448.6	0.000678533	0.468405
Y12	Y	12	1448.6	1448.61	0.00867853	5.99097
Y12	Y	12	1448.6	1448.61	0.0106785	7.37161
Y12	Y	12	1448.6	1448.61	0.0106785	7.37161
Y13	Y	13	1579.64	1579.64	-0.000811467	-0.513703
Y13	Y	13	1579.64	1579.65	0.00318853	2.01851
Y13	Y	13	1579.64	1579.65	0.0101885	6.44989
Y13	Y	13	1579.64	1579.66	0.0121885	7.716
Y14	Y	14	1650.68	1650.68	-0.000921467	-0.558234
Y14	Y	14	1650.68	1650.68	7.85331e-05	0.0475762
Y14	Y	14	1650.68	1650.68	0.00107853	0.653387
Y14	Y	14	1650.68	1650.69	0.00507853	3.07663
Y15	Y	15	1749.75	1749.75	0.00366853	2.09661
Y15	Y	15	1749.75	1749.75	0.00466853	2.66812
Y15	Y	15	1749.75	1749.76	0.0106685	6.09718
Y15	Y	15	1749.75	1749.77	0.0166685	9.52624
Y16	Y	16	1896.82	1896.82	0.00325853	1.71789
Y16	Y	16	1896.82	1896.82	0.00725853	3.82669
Y16	Y	16	1896.82	1896.82	0.00725853	3.82669
Y16	Y	16	1896.82	1896.83	0.0142585	7.51708
Y17	Y	17	1967.85	1967.86	0.00214853	1.09181
Y17	Y	17	1967.85	1967.86	0.00614853	3.12449
Y17	Y	17	1967.85	1967.86	0.00914853	4.64899
Y18	Y	18	2098.9	2098.91	0.0126585	6.03105
Y18	Y	18	2098.9	2098.91	0.0146585	6.98393
Y18	Y	18	2098.9	2098.91	0.0176585	8.41325
Name	Ion Type	Ion Number	Theoretical Mass	Observed Mass	Mass Difference (Da)	Mass Difference (ppm)
B1	B	1	113.048	113.048	1.35331e-05	0.119712
B7	B	7	800.429	800.437	0.00738353	9.22447
B8	B	8	947.498	947.501	0.00297353	3.1383
B9	B	9	1060.58	1060.59	0.00391353	3.68999
B9	B	9	1060.58	1060.59	0.00691353	6.51862
B13	B	13	1532.81	1532.83	0.0127435	8.31382
B18	B	18	2129.18	2129.19	0.0161635	7.59144
B23	B	23	2643.43	2643.45	0.0202135	7.64671		10836.9
B24	B	24	2744.48	2744.49	0.0125335	4.56682
B25	B	25	2843.54	2843.55	0.00512353	1.80181		P61604 (CH10_HUMAN)
B25	B	25	2843.54	2843.55	0.00912353	3.20851		10 kDa heat shock protein, mitochondrial
B26	B	26	2944.59	2944.6	0.0124435	4.22589
B26	B	26	2944.59	2944.61	0.0154435	5.24471
B27	B	27	3072.69	3072.69	0.00448353	1.45916
B27	B	27	3072.69	3072.72	0.0294835	9.59536
B29	B	29	3186.73	3186.75	0.0195635	6.13906
B29	B	29	3186.73	3186.76	0.0255635	8.02187
B30	B	30	3299.81	3299.85	0.0315035	9.54706
B31	B	31	3430.85	3430.86	0.00901353	2.6272
B32	B	32	3543.94	3543.97	0.0289535	8.16987
B32	B	32	3543.94	3543.97	0.0329535	9.29856
Y4	Y	4	523.264	523.266	0.00151853	2.90204
Y7	Y	7	806.454	806.455	0.000938533	1.16378
Name	Ion Type	Ion Number	Theoretical Mass	Observed Mass	Mass Difference (Da)	Mass Difference (ppm)
B3	B	3	342.165	342.166	0.000558533	1.63235
B7	B	7	641.325	641.326	0.00121853	1.90003
B8	B	8	769.419	769.421	0.00125853	1.63569
B8	B	8	769.419	769.421	0.00125853	1.63569
B8	B	8	769.419	769.421	0.00125853	1.63569
B8	B	8	769.419	769.422	0.00225853	2.93537
B8	B	8	769.419	769.422	0.00225853	2.93537
B9	B	9	826.441	826.442	0.000798533	0.966231		11300.5
B9	B	9	826.441	826.443	0.00179853	2.17624
B9	B	9	826.441	826.443	0.00179853	2.17624		P62805 (H4_HUMAN)
B9	B	9	826.441	826.443	0.00179853	2.17624		Histone H4
B9	B	9	826.441	826.444	0.00279853	3.38625
B10	B	10	939.525	939.527	0.00173853	1.85044
B10	B	10	939.525	939.527	0.00173853	1.85044
B10	B	10	939.525	939.527	0.00173853	1.85044
B11	B	11	996.546	996.548	0.00127853	1.28296
B11	B	11	996.546	996.549	0.00227853	2.28643
B11	B	11	996.546	996.55	0.00327853	3.28989
B11	B	11	996.546	996.55	0.00327853	3.28989
B11	B	11	996.546	996.55	0.00327853	3.28989
B12	B	12	1124.64	1124.64	-0.000681467	-0.605941
B12	B	12	1124.64	1124.64	0.00231853	2.06158
B12	B	12	1124.64	1124.64	0.00231853	2.06158
Y2	Y	2	132.053	132.054	0.000238533	1.80634
Y12	Y	12	1338.72	1338.72	0.00807853	6.03454
Y13	Y	13	1451.8	1451.8	0.00401853	2.76797
Y13	Y	13	1451.8	1451.8	0.00501853	3.45677
Y13	Y	13	1451.8	1451.8	0.00501853	3.45677
Y13	Y	13	1451.8	1451.81	0.00601853	4.14557
Y13	Y	13	1451.8	1451.81	0.00801853	5.52317
Y14	Y	14	1522.84	1522.84	0.00190853	1.25327
Y14	Y	14	1522.84	1522.84	0.00190853	1.25327
Y14	Y	14	1522.84	1522.84	0.00390853	2.56661
Y14	Y	14	1522.84	1522.84	0.00390853	2.56661
Y14	Y	14	1522.84	1522.84	0.00490853	3.22328
Y15	Y	15	1685.9	1685.9	0.00257853	1.52947
Y15	Y	15	1685.9	1685.9	0.00257853	1.52947
Y15	Y	15	1685.9	1685.9	0.00257853	1.52947
Y15	Y	15	1685.9	1685.9	0.00357853	2.12262
Y15	Y	15	1685.9	1685.9	0.00457853	2.71578
Y16	Y	16	1784.97	1784.97	0.000168533	0.094418
Y16	Y	16	1784.97	1784.97	0.00216853	1.21489
Y16	Y	16	1784.97	1784.97	0.00216853	1.21489
Y16	Y	16	1784.97	1784.97	0.00316853	1.77512
Y16	Y	16	1784.97	1784.97	0.00316853	1.77512
Y17	Y	17	1884.04	1884.04	-0.00124147	-0.65894
Y17	Y	17	1884.04	1884.04	0.00175853	0.933386
Y17	Y	17	1884.04	1884.04	0.00175853	0.933386
Y17	Y	17	1884.04	1884.05	0.0177585	9.42579
Y18	Y	18	1999.06	1999.07	0.00281853	1.40993
Y18	Y	18	1999.06	1999.07	0.00581853	2.91063
Y19	Y	19	2130.1	2130.1	-0.000671467	-0.315227
Y19	Y	19	2130.1	2130.11	0.00132853	0.623694
Y19	Y	19	2130.1	2130.11	0.00232853	1.09315
Y19	Y	19	2130.1	2130.11	0.00432853	2.03208
Y19	Y	19	2130.1	2130.11	0.00432853	2.03208
Y20	Y	20	2201.14	2201.15	0.00621853	2.82514
Y20	Y	20	2201.14	2201.15	0.00621853	2.82514
Y20	Y	20	2201.14	2201.15	0.0112185	5.09669
Y20	Y	20	2201.14	2201.15	0.0132185	6.00531
Y21	Y	21	2302.19	2302.19	0.00253853	1.10266
Y21	Y	21	2302.19	2302.19	0.00253853	1.10266
Y21	Y	21	2302.19	2302.2	0.00853853	3.70888
Y21	Y	21	2302.19	2302.2	0.0135385	5.88072
Y28	Y	28	3122.69	3122.69	-0.00360147	-1.15332
Y28	Y	28	3122.69	3122.7	0.0123985	3.97046
Y49	Y	49	5527	5527.02	0.0119985	2.17089
Y49	Y	49	5527	5527.02	0.0169985	3.07554
Name	Ion Type	Ion Number	Theoretical Mass	Observed Mass	Mass Difference (Da)	Mass Difference (ppm)
B3	B	3	342.165	342.166	0.000558533	1.63235
B8	B	8	769.419	769.42	0.000258533	0.336011
B8	B	8	769.419	769.421	0.00125853	1.63569
B8	B	8	769.419	769.422	0.00225853	2.93537
B9	B	9	826.441	826.442	0.000798533	0.966231
B9	B	9	826.441	826.442	0.000798533	0.966231
B9	B	9	826.441	826.443	0.00179853	2.17624
B10	B	10	939.525	939.526	0.000738533	0.786071		11342.4
B10	B	10	939.525	939.527	0.00173853	1.85044
B10	B	10	939.525	939.533	0.00773853	8.23664		P62805 (H4_HUMAN)
B11	B	11	996.546	996.551	0.00427853	4.29336		Histone H4
B12	B	12	1124.64	1124.64	0.00231853	2.06158
B12	B	12	1124.64	1124.65	0.00431853	3.83992
B12	B	12	1124.64	1124.65	0.00831853	7.39661
B12	B	12	1124.64	1124.65	0.0103185	9.17495
B13	B	13	1181.66	1181.67	0.00985853	8.34293
B53	B	53	5814.43	5814.48	0.0515179	8.86036
B85	B	85	9457.39	9457.38	-0.0172421	-1.82313
B85	B	85	9457.39	9457.43	0.0367579	3.88669
B100	B	100	11209.4	11209.4	0.0462779	4.1285
Y12	Y	12	1338.72	1338.71	-0.00392147	-2.92928
Y13	Y	13	1451.8	1451.81	0.0100185	6.90077
Y14	Y	14	1522.84	1522.84	0.00290853	1.90994
Y14	Y	14	1522.84	1522.84	0.00590853	3.87995
Y14	Y	14	1522.84	1522.84	0.00790853	5.19329
Y15	Y	15	1685.9	1685.9	0.00357853	2.12262
Y15	Y	15	1685.9	1685.91	0.0115785	6.86786
Y16	Y	16	1784.97	1784.97	0.00316853	1.77512
Y16	Y	16	1784.97	1784.98	0.0121685	6.81723
Y17	Y	17	1884.04	1884.05	0.00875853	4.64881
Y18	Y	18	1999.06	1999.07	0.00281853	1.40993
Y18	Y	18	1999.06	1999.08	0.0158185	7.91297
Y27	Y	27	2985.63	2985.66	0.0293085	9.81652
Y28	Y	28	3122.69	3122.7	0.0103985	3.32999
Y49	Y	49	5527	5527.04	0.0389985	7.056
Name	Ion Type	Ion Number	Theoretical Mass	Observed Mass	Mass Difference (Da)	Mass Difference (ppm)
B1	B	1	129.043	129.043	0.000128533	0.996052
B2	B	2	258.085	258.086	0.000538533	2.08665
B4	B	4	473.212	473.213	0.000548533	1.15917
B5	B	5	572.281	572.282	0.00113853	1.98947
B6	B	6	701.323	701.323	-0.000451467	-0.643736
B6	B	6	701.323	701.324	0.000548533	0.78214
B6	B	6	701.323	701.325	0.00154853	2.20802
B7	B	7	772.36	772.361	0.000438533	0.567783
B7	B	7	772.36	772.362	0.00143853	1.86252
B8	B	8	843.397	843.399	0.00132853	1.57522
B8	B	8	843.397	843.4	0.00232853	2.7609
B9	B	9	914.435	914.436	0.00121853	1.33255		11435.1
B9	B	9	914.435	914.437	0.00221853	2.42613
B9	B	9	914.435	914.438	0.00321853	3.5197		P20962 (PTMS_HUMAN)
B10	B	10	1043.48	1043.48	0.000628533	0.602345		Parathymosin
B10	B	10	1043.48	1043.48	0.00162853	1.56068
B10	B	10	1043.48	1043.48	0.00362853	3.47735
B15	B	15	1557.75	1557.76	0.00352853	2.26514
B15	B	15	1557.75	1557.76	0.00652853	4.191
B15	B	15	1557.75	1557.76	0.00752853	4.83295
B41	B	41	4753.5	4753.51	0.0152985	3.21837
B41	B	41	4753.5	4753.53	0.0282985	5.9532
B43	B	43	4924.56	4924.58	0.0149085	3.02738
B43	B	43	4924.56	4924.58	0.0149085	3.02738
B43	B	43	4924.56	4924.58	0.0169085	3.43351
Y2	Y	2	176.08	176.08	1.85331e-05	0.105254
Y15	Y	15	1600.78	1600.79	0.0112385	7.02066
Y27	Y	27	2867.4	2867.41	0.00784853	2.73716
Y27	Y	27	2867.4	2867.42	0.0148485	5.17839
Y27	Y	27	2867.4	2867.42	0.0238485	8.31713
Y28	Y	28	2996.44	2996.45	0.00925853	3.08984
Y29	Y	29	3111.47	3111.49	0.0213185	6.85159
Y31	Y	31	3355.54	3355.56	0.0217885	6.4933
Y31	Y	31	3355.54	3355.56	0.0237885	7.08933
Y32	Y	32	3484.58	3484.61	0.0261985	7.51841
Y32	Y	32	3484.58	3484.61	0.0281985	8.09237
Y33	Y	33	3613.63	3613.66	0.0306085	8.47031
Name	Ion Type	Ion Number	Theoretical Mass	Observed Mass	Mass Difference (Da)	Mass Difference (ppm)
B2	B	2	212.08	212.08	2.35331e-05	0.110964
B2	B	2	212.08	212.08	2.35331e-05	0.110964
Y1	Y	1	146.106	146.106	0.000198533	1.35883
Y2	Y	2	233.138	233.138	0.000168533	0.722891
Y3	Y	3	320.17	320.17	0.000138533	0.432687
Y3	Y	3	320.17	320.17	0.000138533	0.432687
Y4	Y	4	421.217	421.218	0.000458533	1.08859
Y4	Y	4	421.217	421.218	0.000458533	1.08859
Y5	Y	5	584.281	584.282	0.00112853	1.93149		13781.6
Y5	Y	5	584.281	584.282	0.00112853	1.93149
Y6	Y	6	712.376	712.377	0.00116853	1.64033		Q5QNW6 (H2B2F_HUMAN)
Y6	Y	6	712.376	712.377	0.00116853	1.64033		Histone H2B type 2-F
Y7	Y	7	813.423	813.425	0.00148853	1.82996
Y7	Y	7	813.423	813.425	0.00148853	1.82996
Y8	Y	8	912.492	912.492	7.85331e-05	0.0860645
Y8	Y	8	912.492	912.497	0.00507853	5.56557
Y9	Y	9	983.529	983.53	0.000968533	0.984753
Y9	Y	9	983.529	983.532	0.00296853	3.01825
Y10	Y	10	1111.62	1111.63	0.00400853	3.60602
Y12	Y	12	1269.69	1269.7	0.00286853	2.25923
Y14	Y	14	1485.77	1485.77	0.000248533	0.167276
Y14	Y	14	1485.77	1485.77	0.00224853	1.51338
Y15	Y	15	1584.84	1584.84	0.00283853	1.79106
Y16	Y	16	1655.87	1655.88	0.00472853	2.85561
Y16	Y	16	1655.87	1655.88	0.00672853	4.06344
Y17	Y	17	1792.93	1792.93	0.00281853	1.57202
Name	Ion Type	Ion Number	Theoretical Mass	Observed Mass	Mass Difference (Da)	Mass Difference (ppm)
B11	B	11	1124.62	1124.62	-0.000541467	-0.481468
B46	B	46	4898.74	4898.74	-0.00394147	-0.804588
B46	B	46	4898.74	4898.74	0.00205853	0.420217
B46	B	46	4898.74	4898.76	0.0170585	3.48223
B46	B	46	4898.74	4898.77	0.0270585	5.52357
B47	B	47	4969.78	4969.79	0.0109485	2.20302
B47	B	47	4969.78	4969.79	0.0129485	2.60545
B47	B	47	4969.78	4969.8	0.0179485	3.61154
B47	B	47	4969.78	4969.8	0.0199485	4.01397
B48	B	48	5066.83	5066.84	0.00718853	1.41874		13998.9
B48	B	48	5066.83	5066.84	0.0121885	2.40555		Histone H2A type 2-A
B48	B	48	5066.83	5066.85	0.0151885	2.99764
B48	B	48	5066.83	5066.85	0.0171885	3.39236
B48	B	48	5066.83	5066.86	0.0291885	5.76071
B49	B	49	5165.9	5165.91	0.00977853	1.8929
B49	B	49	5165.9	5165.91	0.0117785	2.28005
B49	B	49	5165.9	5165.91	0.0127785	2.47363
B49	B	49	5165.9	5165.92	0.0167785	3.24794
B50	B	50	5328.96	5328.97	0.00544853	1.02244
B50	B	50	5328.96	5328.97	0.0104485	1.96071
B50	B	50	5328.96	5328.98	0.0124485	2.33601
B50	B	50	5328.96	5328.98	0.0134485	2.52367
B50	B	50	5328.96	5328.98	0.0184485	3.46194
B51	B	51	5460	5459.99	-0.0100415	-1.8391
B51	B	51	5460	5460.01	0.00495853	0.908156
B51	B	51	5460	5460.01	0.00595853	1.09131
B51	B	51	5460	5460.01	0.0109585	2.00706
B51	B	51	5460	5460.02	0.0179585	3.28911
B51	B	51	5460	5460.04	0.0339585	6.21951
B52	B	52	5531.04	5531.05	0.00684853	1.2382
B52	B	52	5531.04	5531.05	0.00884853	1.5998
B52	B	52	5531.04	5531.06	0.0148485	2.68458
B53	B	53	5602.08	5602.08	0.00473853	0.845853
B53	B	53	5602.08	5602.08	0.00673853	1.20286
B53	B	53	5602.08	5602.09	0.0137385	2.4524
B53	B	53	5602.08	5602.11	0.0367385	6.55802
B54	B	54	5701.15	5701.16	0.0133285	2.33787
B54	B	54	5701.15	5701.16	0.0153285	2.68868
B56	B	56	5943.27	5943.29	0.0156785	2.63803
B56	B	56	5943.27	5943.3	0.0276785	4.65712
Y2	Y	2	203.127	203.128	0.000738533	3.63582
Y3	Y	3	331.222	331.223	0.000778533	2.35049
Y4	Y	4	402.259	402.26	0.000668533	1.66195
Y4	Y	4	402.259	402.261	0.00166853	4.14791
Y5	Y	5	530.354	530.355	0.000708533	1.33596
Y5	Y	5	530.354	530.356	0.00170853	3.2215
Y6	Y	6	667.413	667.414	0.000798533	1.19646
Y6	Y	6	667.413	667.415	0.00179853	2.69478
Y6	Y	6	667.413	667.416	0.00279853	4.19311
Y8	Y	8	891.504	891.504	-0.000141467	-0.158683
Y8	Y	8	891.504	891.506	0.00185853	2.08472
Y8	Y	8	891.504	891.508	0.00385853	4.32812
Y8	Y	8	891.504	891.51	0.00585853	6.57152
Y9	Y	9	1020.55	1020.56	0.00926853	9.08193
Y10	Y	10	1121.59	1121.59	-0.00341147	-3.04162
Y10	Y	10	1121.59	1121.59	-0.000411467	-0.366859
Y10	Y	10	1121.59	1121.59	0.000588533	0.524729
Y10	Y	10	1121.59	1121.6	0.00158853	1.41632
Y10	Y	10	1121.59	1121.6	0.00258853	2.30791
Y11	Y	11	1249.69	1249.69	0.00262853	2.10335
Y11	Y	11	1249.69	1249.69	0.00462853	3.70375
Y11	Y	11	1249.69	1249.7	0.00762853	6.10434
Y12	Y	12	1377.78	1377.79	0.00266853	1.93683
Y12	Y	12	1377.78	1377.79	0.00366853	2.66263
Y13	Y	13	1474.84	1474.84	0.000908533	0.616023
Y13	Y	13	1474.84	1474.84	0.00190853	1.29406
Y13	Y	13	1474.84	1474.84	0.00290853	1.97211
Y13	Y	13	1474.84	1474.84	0.00290853	1.97211
Y13	Y	13	1474.84	1474.84	0.00390853	2.65015
Y14	Y	14	1587.92	1587.92	0.000848533	0.534367
Y14	Y	14	1587.92	1587.92	0.00184853	1.16412
Y14	Y	14	1587.92	1587.93	0.00484853	3.05338
Y14	Y	14	1587.92	1587.93	0.00884853	5.5724
Y14	Y	14	1587.92	1587.93	0.00984853	6.20216
Y14	Y	14	1587.92	1587.93	0.0108485	6.83191
Y17	Y	17	1871.11	1871.11	0.00426853	2.28128
Y17	Y	17	1871.11	1871.12	0.0112685	6.02238
Y18	Y	18	1999.17	1999.16	-0.00931147	-4.65767
Y18	Y	18	1999.17	1999.17	0.00168853	0.844617
Y18	Y	18	1999.17	1999.18	0.00668853	3.34566
Y18	Y	18	1999.17	1999.18	0.00868853	4.34607
Y21	Y	21	2323.35	2323.35	0.000938533	0.403957
Y21	Y	21	2323.35	2323.35	0.00393853	1.6952
Y21	Y	21	2323.35	2323.35	0.00493853	2.12561
Y21	Y	21	2323.35	2323.35	0.00593853	2.55602
Y21	Y	21	2323.35	2323.36	0.00893853	3.84726
Y22	Y	22	2436.43	2436.44	0.00587853	2.41276
Y40	Y	40	4301.46	4301.43	-0.0269015	-6.25403
Name	Ion Type	Ion Number	Theoretical Mass	Observed Mass	Mass Difference (Da)	Mass Difference (ppm)
B2	B	2	212.152	212.153	0.000253533	1.19505
B11	B	11	1152.65	1152.65	0.000473533	0.410821
Y1	Y	1	174.112	174.112	4.85331e-05	0.278747
Y2	Y	2	337.175	337.176	0.000718533	2.13104
Y3	Y	3	465.27	465.271	0.000758533	1.63031
Y4	Y	4	552.302	552.303	0.000728533	1.31908
Y5	Y	5	653.35	653.351	0.00104853	1.60486		15117.9
Y6	Y	6	766.434	766.435	0.000988533	1.28978
Y7	Y	7	865.502	865.504	0.00157853	1.82384		P69905 (HBA_HUMAN)
Y7	Y	7	865.502	865.506	0.00357853	4.13463		Hemoglobin subunit alpha
Y8	Y	8	966.55	966.551	0.000898533	0.929629
Y9	Y	9	1053.58	1053.58	0.000868533	0.824362
Y10	Y	10	1152.65	1152.65	0.000458533	0.397808
Y11	Y	11	1239.68	1239.68	0.00142853	1.15234
Y12	Y	12	1310.72	1310.72	-0.00168147	-1.28286
Y13	Y	13	1423.8	1423.81	0.0102585	7.20502
Name	Ion Type	Ion Number	Theoretical Mass	Observed Mass	Mass Difference (Da)	Mass Difference (ppm)
B2	B	2	236.127	236.128	0.000403533	1.70896
B3	B	3	349.211	349.212	0.000343533	0.98374
B4	B	4	450.259	450.259	-0.000336467	-0.747274
B7	B	7	805.397	805.398	0.000723533	0.898356
B10	B	10	1091.56	1091.57	0.00462353	4.23571
B12	B	12	1291.68	1291.69	0.00853353	6.60655		15858.2
B13	B	13	1362.71	1362.72	0.00242353	1.77846
B14	B	14	1475.8	1475.81	0.00736353	4.98953		P68871 (HBB_HUMAN)
B22	B	22	2403.24	2403.26	0.0123535	5.14036		Hemoglobin subunit beta
Y1	Y	1	155.069	155.07	0.000248533	1.60272
Y2	Y	2	318.133	318.133	-8.14669e-05	-0.256078
Y3	Y	3	446.228	446.228	-4.14669e-05	-0.0929276
Y4	Y	4	583.287	583.287	4.85331e-05	0.0832063
Y5	Y	5	654.324	654.324	-6.14669e-05	-0.0939395
Y6	Y	6	767.408	767.409	0.000878533	1.14481
Y8	Y	8	952.488	952.488	-0.000161467	-0.169521
Y9	Y	9	1023.52	1023.52	-0.000271467	-0.265227
Y10	Y	10	1122.59	1122.6	0.00531853	4.73772
Y11	Y	11	1179.61	1179.61	-0.00214147	-1.81539
Y12	Y	12	1250.65	1250.65	0.00174853	1.3981
Y13	Y	13	1349.72	1349.72	0.00233853	1.73261
Y14	Y	14	1448.79	1448.8	0.00792853	5.47253
Y15	Y	15	1576.88	1576.89	0.00596853	3.78502
Y23	Y	23	2431.31	2431.32	0.0103285	4.24813
Name	Ion Type	Ion Number	Theoretical Mass	Observed Mass	Mass Difference (Da)	Mass Difference (ppm)
B3	B	3	342.19	342.191	0.000373533	1.09159
B4	B	4	413.227	413.228	0.000263533	0.637743
B4	B	4	413.227	413.228	0.000263533	0.637743
B5	B	5	512.296	512.297	0.000853533	1.66609
B6	B	6	615.305	615.306	0.000663533	1.07838
B6	B	6	615.305	615.307	0.00166353	2.70359
B7	B	7	714.373	714.376	0.00225353	3.15456
B7	B	7	714.373	714.377	0.00325353	4.55439
B7	B	7	714.373	714.378	0.00425353	5.95421
B8	B	8	827.458	827.458	0.000193533	0.233889
B8	B	8	827.458	827.459	0.00119353	1.44241		15836
B10	B	10	1012.57	1012.57	0.000773533	0.763928		Superoxide dismutase [Cu-Zn]
B10	B	10	1012.57	1012.58	0.00177353	1.75151
B11	B	11	1127.6	1127.6	0.00383353	3.39973
B11	B	11	1127.6	1127.61	0.00483353	4.28656
B11	B	11	1127.6	1127.61	0.00583353	5.1734
B12	B	12	1184.62	1184.62	0.00137353	1.15947
B12	B	12	1184.62	1184.62	0.00237353	2.00362
B14	B	14	1380.74	1380.74	0.000203533	0.147408
B14	B	14	1380.74	1380.74	0.00120353	0.871656
B14	B	14	1380.74	1380.75	0.00220353	1.5959
B14	B	14	1380.74	1380.75	0.00320353	2.32015
B14	B	14	1380.74	1380.75	0.00420353	3.0444
B16	B	16	1565.82	1565.83	0.00816353	5.21357
B16	B	16	1565.82	1565.83	0.00916353	5.85221
B16	B	16	1565.82	1565.83	0.0111635	7.1295
Y22	Y	22	2160.07	2160.09	0.0168535	7.8023
