# Supplementary material for: Ependymoma Pediatric Brain Tumor Protein Fingerprinting by Integrated Mass Spectrometry Platforms: A Pilot Investigation
Source: Cancers (Basel). 2020 Mar 13;12(3):674. doi: 10.3390/cancers12030674 (PMC7140025; doi:10.3390/cancers12030674)
Supplement: Supplementary file 1 [file cancers-12-00674-s001.zip › Table S2.xlsx]

## Sheet: EP1
Accession	Description	ΣCoverage	Σ# Proteins	Σ# Unique Peptides	Σ# Peptides	Σ# PSMs	A5: Area	B5: Area	C5: Area	Score A2	Coverage A2	# Peptides A2	# PSM A2	Score B2	Coverage B2	# Peptides B2	# PSM B2	Score C2	Coverage C2	# Peptides C2	# PSM C2	# AAs	MW [kDa]	calc. pI
P68871	Hemoglobin subunit beta OS=Homo sapiens OX=9606 GN=HBB PE=1 SV=2 - [HBB_HUMAN]	91.16	1	14	20	2129	2.64315e+08	4.851e+08	4.97269e+08	2310.88	91.16	20	1061	1336.45	89.8	17	539	1326.4	89.8	18	529	147	15.9883	7.28369
	Sequence	# PSMs	# Proteins	# Protein Groups	Protein Group Accessions	Modifications	MH+ [Da]	A5: Area	B5: Area	C5: Area	q-Value	PEP	A2	XCorr A2	B2	XCorr B2	C2	XCorr C2	# Missed Cleavages
	KVLGAFSDGLAHLDNLK	43	2	2	P68871;P02042		1797.99	4.35215e+07	7.99623e+07	8.64028e+07	0	2.27e-12	High	6.77252	High	5.94985	High	6.22357	1
	SAVTALWGKVNVDEVGGEALGR	20	1	1	P68871		2228.17	1.00823e+07	1.77747e+07	1.79702e+07	0	1.23e-13	High	6.70582	High	4.73323	High	5.09207	1
	FFESFGDLSTPDAVMGNPK	574	1	1	P68871		2058.95	1.81847e+08	2.97054e+08	3.11506e+08	0	1.79e-07	High	6.25679	High	6.16812	High	6.22146	0
	FFESFGDLSTPDAVMGNPK	115	1	1	P68871	M15(Oxidation)	2074.95	3.01388e+07	8.06751e+07	9.09007e+07	0	2.26e-08	High	5.76299	High	5.82215	High	5.87838	0
	VLGAFSDGLAHLDNLK	162	2	2	P68871;P02042		1669.9	1.33606e+08	2.89686e+08	2.93009e+08	0	5.482e-11	High	5.4667	High	6.2797	High	6.09537	0
	GTFATLSELHCDKLHVDPENFR	32	1	1	P68871	C11(Carbamidomethyl)	2586.25	5.3682e+07	1.34555e+08	1.39714e+08	0	9.944e-11	High	5.44206	High	3.97455	High	5.32969	1
	VNVDEVGGEALGR	151	1	1	P68871		1314.67	2.70637e+08	4.89794e+08	5.62778e+08	0	2.318e-05	High	5.28814	High	5.30182	High	5.19707	0
	VVAGVANALAHKYH	53	2	2	P68871;P02042		1449.8	7.14194e+07	1.3295e+08	1.43255e+08	0	2.026e-07	High	5.01225	High	5.2586	High	5.39256	1
	LLGNVLVCVLAHHFGK	59	1	1	P68871	C8(Carbamidomethyl)	1777	2.82522e+07	6.94051e+07	6.89279e+07	0	6.338e-07	High	4.9342	High	4.54251	High	4.0022	0
	GTFATLSELHCDK	17	1	1	P68871	C11(Carbamidomethyl)	1478.7	1.17161e+07	3.31765e+07	3.21082e+07	0	6.148e-06	High	4.7063	High	4.33161	High	4.69378	0
	VVAGVANALAHK	56	2	2	P68871;P02042		1149.68	4.75791e+07	9.89844e+07	1.20859e+08	0	3.54e-06	High	4.25895	High	4.71631	High	4.53241	0
	FFESFGDLSTPDAVMGNPKVK	1	1	1	P68871		2286.12	858578	0	0	0	3.927e-07	High	4.0541					1
	EFTPPVQAAYQK	33	1	1	P68871		1378.7	7.88473e+07	1.83041e+08	2.01171e+08	0	2.085e-06	High	4.02595	High	3.46993	High	3.62538	0
	VLGAFSDGLAHLDNLKGTFATLSELHCDK	10	1	1	P68871	C27(Carbamidomethyl)	3129.57	6.31536e+06	2.35496e+07	1.56307e+07	0	3.892e-06	High	3.94997	High	2.57049	High	3.22692	1
	LLVVYPWTQR	573	4	3	P68871;P02042;P69891		1274.73	3.4046e+08	6.68453e+08	617522834	0	1.544e-06	High	3.4459	High	3.02862	High	3.24986	0
	LLGNVLVCVLAHHFGKEFTPPVQAAYQK	44	1	1	P68871	C8(Carbamidomethyl)	3136.68	1.65664e+07	5.22102e+07	5.50587e+07	0	0.000104	High	3.41323	High	3.47772	High	2.81481	1
	SAVTALWGK	150	1	1	P68871		932.521	1.13698e+08	1.929e+08	2.20733e+08	0	3.256e-05	High	3.34349	High	3.54219	High	3.54667	0
	LHVDPENFR	20	2	2	P68871;P02042		1126.57	1.133e+07	1.45066e+07	1.68195e+07	0	3.642e-05	High	3.07381	High	2.89585	High	2.85695	0
	KVLGAFSDGLAHLDNLKGTFATLSELHCDK	4	1	1	P68871	C28(Carbamidomethyl)	3257.68	3.20662e+06	5.01469e+06	5.31584e+06	0	0.0002792	High	2.81927	High	3.02105	High	1.61145	2
	VLGAFSDGLAHLDNLKGTFATLSELHCDKLHVDPENFR	11	1	1	P68871	C27(Carbamidomethyl)	4237.12	7.27716e+06	0	1.90723e+07	0	5.458e-05	High	2.62689			High	1.96393	2
	LLVVYPWTQRFFESFGDLSTPDAVMGNPK	1	1	1	P68871		3314.65	0	0	0	0.003	0.04123	High	1.4838					1
P69905	Hemoglobin subunit alpha OS=Homo sapiens OX=9606 GN=HBA1 PE=1 SV=2 - [HBA_HUMAN]	90.14	1	15	15	785	1.85321e+08	4.08817e+08	4.61152e+08	992.714	90.14	14	459	391.804	87.32	12	163	370.769	87.32	11	163	142	15.2479	8.67529
	Sequence	# PSMs	# Proteins	# Protein Groups	Protein Group Accessions	Modifications	MH+ [Da]	A5: Area	B5: Area	C5: Area	q-Value	PEP	A2	XCorr A2	B2	XCorr B2	C2	XCorr C2	# Missed Cleavages
	VADALTNAVAHVDDMPNALSALSDLHAHK	112	1	1	P69905		2996.5	1.26572e+08	3.71276e+08	3.71722e+08	0	3.457e-16	High	9.49589	High	6.79109	High	6.97607	0
	KVADALTNAVAHVDDMPNALSALSDLHAHK	57	1	1	P69905		3124.59	4.03038e+07	1.4063e+08	1.45668e+08	0	1.068e-12	High	7.46638	High	4.79854	High	5.193	1
	VADALTNAVAHVDDMPNALSALSDLHAHK	30	1	1	P69905	M15(Oxidation)	3012.49	3.10924e+07	1.01217e+08	1.04592e+08	0	9.154e-12	High	7.06836	High	4.66511	High	5.0131	0
	KVADALTNAVAHVDDMPNALSALSDLHAHK	16	1	1	P69905	M16(Oxidation)	3140.6	1.00963e+07	2.97336e+07	2.93847e+07	0	4.3552e-18	High	6.40197	High	4.2498	High	4.55288	1
	VGAHAGEYGAEALER	131	1	1	P69905		1529.74	1.37175e+08	4.49252e+08	4.89307e+08	0	7.553e-09	High	5.66801	High	4.74659	High	4.60466	0
	AAWGKVGAHAGEYGAEALER	7	1	1	P69905		2043.01	527968	1.47402e+06	1.57515e+06	0	1.203e-08	High	5.23254	High	3.08632	High	3.33754	1
	TYFPHFDLSHGSAQVK	79	1	1	P69905		1833.89	1.99014e+08	4.05923e+08	4.49413e+08	0	7.889e-10	High	5.20635	High	6.0503	High	5.58466	0
	VADALTNAVAHVDDMPNALSALSDLHAHKLR	12	1	1	P69905		3265.68	1.1275e+07	1.94044e+07	2.06678e+07	0	6.545e-11	High	4.60367	High	2.49364	High	2.05055	1
	FLASVSTVLTSK	5	1	1	P69905		1252.72	3.64062e+06	8.80034e+06	8.64658e+06	0	2.714e-07	High	3.74553	High	3.76313	High	4.01062	0
	LRVDPVNFK	29	1	1	P69905		1087.63	2.32916e+07	5.46432e+07	6.32062e+07	0	1.112e-05	High	3.47203	High	3.44846	High	3.70002	1
	LLSHCLLVTLAAHLPAEFTPAVHASLDKFLASVSTVLTSK	10	1	1	P69905	C5(Carbamidomethyl)	4258.33	592091	0	0	0	8.598e-05	High	3.377					1
	MFLSFPTTK	211	1	1	P69905		1071.55	2.19774e+08	3.61146e+08	4.44735e+08	0	0.000269	High	3.06099	High	3.06033	High	3.0136	0
	LLSHCLLVTLAAHLPAEFTPAVHASLDK	4	1	1	P69905	C5(Carbamidomethyl)	3024.64	620625	1.34236e+06	1.25424e+06	0	0.001694	High	2.92134	High	2.87736	High	1.81069	0
	MFLSFPTTK	73	1	1	P69905	M1(Oxidation)	1087.55	2.48728e+07	7.47197e+07	7.76891e+07	0	0.0006357	High	2.84074	High	3.13426	High	3.07573	0
	VADALTNAVAHVDDMPNALSALSDLHAHKLR	3	1	1	P69905	M15(Oxidation)	3281.68	1.78169e+06	0	3.83718e+06	0	1.536e-05	High	2.71713			High	1.82238	1
	TYFPHFDLSHGSAQVKGHGK	1	1	1	P69905		2213.09	484094	0	0	0	0.005543	High	1.61068					1
	KVADALTNAVAHVDDMPNALSALSDLHAHKLR	3	1	1	P69905		3393.78	1.47407e+06	3.39888e+06	3.82958e+06	0.001	0.007655	High	2.11302	High	2.08484	High	1.24232	2
	VGAHAGEYGAEALERMFLSFPTTK	1	1	1	P69905		2582.27	0	944593	0	0.002	0.02589			High	1.96251			1
	TYFPHFDLSHGSAQVKGHGKK	1	1	1	P69905		2341.19	685947	0	0	0.005	0.06599	High	3.33809					2
P02042	Hemoglobin subunit delta OS=Homo sapiens OX=9606 GN=HBD PE=1 SV=2 - [HBD_HUMAN]	89.8	1	8	14	964	1.81829e+08	3.63696e+08	3.51262e+08	884.23	81.63	12	420	674.136	83.67	13	273	661.233	83.67	13	271	147	16.0453	8.04541
	Sequence	# PSMs	# Proteins	# Protein Groups	Protein Group Accessions	Modifications	MH+ [Da]	A5: Area	B5: Area	C5: Area	q-Value	PEP	A2	XCorr A2	B2	XCorr B2	C2	XCorr C2	# Missed Cleavages
	KVLGAFSDGLAHLDNLK	43	2	2	P68871;P02042		1797.99	4.35215e+07	7.99623e+07	8.64028e+07	0	2.27e-12	High	6.77252	High	5.94985	High	6.22357	1
	FFESFGDLSSPDAVMGNPK	17	1	1	P02042		2044.94	4.18982e+06	1.00594e+07	1.08944e+07	0	6.926e-10	High	6.02544	High	5.98446	High	6.17648	0
	VLGAFSDGLAHLDNLK	162	2	2	P68871;P02042		1669.9	1.33606e+08	2.89686e+08	2.93009e+08	0	5.482e-11	High	5.4667	High	6.2797	High	6.09537	0
	VVAGVANALAHKYH	53	2	2	P68871;P02042		1449.8	7.14194e+07	1.3295e+08	1.43255e+08	0	2.026e-07	High	5.01225	High	5.2586	High	5.39256	1
	VNVDAVGGEALGR	8	1	1	P02042		1256.66	6.63366e+06	1.88915e+07	1.89044e+07	0	2.026e-08	High	4.87535	High	4.57242	High	5.12171	0
	NFGKEFTPQMQAAYQK	5	1	1	P02042		1887.91	1.53179e+06	3.82583e+06	4.26232e+06	0	1.339e-07	High	4.52465	High	5.23039	High	4.58518	1
	FFESFGDLSSPDAVMGNPK	8	1	1	P02042	M15(Oxidation)	2060.93	830519	2.58955e+06	2.70238e+06	0	4.093e-08	High	4.35139	High	4.1752	High	5.54586	0
	VVAGVANALAHK	56	2	2	P68871;P02042		1149.68	4.75791e+07	9.89844e+07	1.20859e+08	0	3.54e-06	High	4.25895	High	4.71631	High	4.53241	0
	LLVVYPWTQR	573	4	3	P68871;P02042;P69891		1274.73	3.4046e+08	6.68453e+08	617522834	0	1.544e-06	High	3.4459	High	3.02862	High	3.24986	0
	EFTPQMQAAYQK	6	1	1	P02042		1441.68	767514	2.40432e+06	2.51058e+06	0	3.652e-06	High	3.2445	High	3.84181	High	3.97465	0
	LHVDPENFR	20	2	2	P68871;P02042		1126.57	1.133e+07	1.45066e+07	1.68195e+07	0	3.642e-05	High	3.07381	High	2.89585	High	2.85695	0
	GTFSQLSELHCDKLHVDPENFR	5	1	1	P02042	C11(Carbamidomethyl)	2629.25	1.51512e+06	3.86572e+06	3.70653e+06	0	0.001426	High	2.79128	High	2.77804	High	1.72941	1
	LLGNVLVCVLAR	2	1	1	P02042	C8(Carbamidomethyl)	1326.8	0	1.42633e+06	1.31429e+06	0	2.218e-07			High	3.88053	High	3.57514	0
	GTFSQLSELHCDK	4	1	1	P02042	C11(Carbamidomethyl)	1521.7	0	926623	419451	0	0.0006611			High	3.54896	High	2.86018	0
	NFGKEFTPQMQAAYQK	1	1	1	P02042	M10(Oxidation)	1903.9	0	0	571426	0.005	0.06098					High	2.20735	1
	TAVNALWGK	1	1	1	P02042		959.532	0	0	0	0.009	0.1091	High	2.32804					0
P00441	Superoxide dismutase [Cu-Zn] OS=Homo sapiens OX=9606 GN=SOD1 PE=1 SV=2 - [SODC_HUMAN]	86.36	1	7	7	30	4.12391e+06	6.53267e+06	7.00585e+06	45.1809	86.36	7	15	18.5979	56.49	4	8	16.315	56.49	4	7	154	15.9259	6.12549
	Sequence	# PSMs	# Proteins	# Protein Groups	Protein Group Accessions	Modifications	MH+ [Da]	A5: Area	B5: Area	C5: Area	q-Value	PEP	A2	XCorr A2	B2	XCorr B2	C2	XCorr C2	# Missed Cleavages
	GLTEGLHGFHVHEFGDNTAGCTSAGPHFNPLSR	8	1	1	P00441	C21(Carbamidomethyl)	3519.63	6.43775e+06	1.31679e+07	1.40379e+07	0	4.076e-12	High	5.62985	High	4.04908	High	3.04199	0
	HVGDLGNVTADKDGVADVSIEDSVISLSGDHCIIGR	3	1	1	P00441	C32(Carbamidomethyl)	3720.82	3.22473e+06	0	0	0	4.956e-12	High	5.36687					1
	AVCVLKGDGPVQGIINFEQK	6	1	1	P00441	C3(Carbamidomethyl)	2172.15	1.26713e+06	4.61526e+06	4.80225e+06	0	1.473e-07	High	4.3011	High	4.19895	High	3.79193	1
	TLVVHEKADDLGKGGNEESTK	5	1	1	P00441		2227.12	540281	166000	177675	0	1.972e-05	High	2.92295	High	1.7567	High	2.11318	2
	ESNGPVKVWGSIK	6	1	1	P00441		1400.76	1.07486e+06	1.81489e+06	2.17743e+06	0	0.0001731	High	2.85305	High	3.50055	High	3.60592	1
	GDGPVQGIINFEQK	1	1	1	P00441		1501.77	286831	0	0	0.001	0.01209	High	3.63049					0
	LACGVIGIAQ	1	1	1	P00441	C3(Carbamidomethyl)	1001.55	2.70925e+06	0	0	0.003	0.05036	High	2.12654					0
P0DOY2	Immunoglobulin lambda constant 2 OS=Homo sapiens OX=9606 GN=IGLC2 PE=1 SV=1 - [IGLC2_HUMAN]	85.85	6	6	6	31	859548	2.88149e+06	1.3152e+06	15.663	51.89	4	8	28.264	81.13	5	13	17.459	65.09	4	10	106	11.2865	7.23975
	Sequence	# PSMs	# Proteins	# Protein Groups	Protein Group Accessions	Modifications	MH+ [Da]	A5: Area	B5: Area	C5: Area	q-Value	PEP	A2	XCorr A2	B2	XCorr B2	C2	XCorr C2	# Missed Cleavages
	YAASSYLSLTPEQWK	11	6	1	P0DOY2		1743.86	1.25191e+06	2.75309e+06	2.78985e+06	0	6.542e-07	High	4.0176	High	4.44133	High	4.24794	0
	SYSCQVTHEGSTVEK	10	6	1	P0DOY2	C4(Carbamidomethyl)	1711.76	961101	4.98711e+06	545359	0	4.421e-05	High	3.38074	High	3.1471	High	2.60029	0
	AAPSVTLFPPSSEELQANK	3	3	1	P0DOY2		1986.02	0	129454	341961	0	0.003563			High	2.66427	High	1.87583	0
	ATLVCLISDFYPGAVTVAWK	5	5	1	P0DOY2	C5(Carbamidomethyl)	2211.14	230085	553603	610400	0.001	0.0133	High	3.07481	High	1.85321	High	1.46722	0
	ADSSPVKAGVETTTPSK	1	2	1	P0DOY2		1674.86	0	904253	0	0.002	0.01744			High	2.55856			1
	QSNNKYAASSYLSLTPEQWK	1	6	1	P0DOY2		2315.13	365637	0	0	0.009	0.1072	High	1.8144					1
P05387	60S acidic ribosomal protein P2 OS=Homo sapiens OX=9606 GN=RPLP2 PE=1 SV=1 - [RLA2_HUMAN]	82.61	1	8	8	33	1.73767e+06	3.03214e+06	4.36586e+06	38.1327	82.61	8	12	36.5491	79.13	7	11	36.3229	78.26	6	10	115	11.6578	4.53857
	Sequence	# PSMs	# Proteins	# Protein Groups	Protein Group Accessions	Modifications	MH+ [Da]	A5: Area	B5: Area	C5: Area	q-Value	PEP	A2	XCorr A2	B2	XCorr B2	C2	XCorr C2	# Missed Cleavages
	NIEDVIAQGIGK	9	1	1	P05387		1256.69	2.983e+06	6.06445e+06	6.48983e+06	0	1.523e-07	High	4.66969	High	4.53744	High	4.74505	0
	YVASYLLAALGGNSSPSAK	7	1	1	P05387		1868.98	1.57982e+06	2.04931e+06	2.2367e+06	0	4.28e-09	High	4.13611	High	4.47799	High	5.10509	0
	LASVPAGGAVAVSAAPGSAAPAAGSAPAAAEEK	4	1	1	P05387		2774.44	276268	982663	907916	0	0.0001492	High	4.07078	High	4.2352	High	2.96338	0
	ILDSVGIEADDDRLNK	4	1	1	P05387		1772.91	424385	324603	4.37106e+06	0	8.284e-07	High	3.73728	High	4.50779	High	3.50621	1
	VISELNGKNIEDVIAQGIGK	3	1	1	P05387		2097.16	370194	789446	820590	0	0.0001106	High	3.46268	High	3.67069	High	3.30817	1
	KILDSVGIEADDDRLNK	2	1	1	P05387		1901	200010	469814	0	0	0.0005496	High	2.9877	High	3.29472			2
	MRYVASYLLAALGGNSSPSAK	2	1	1	P05387		2156.11	0	479894	0	0	0.002443	High	2.94778	High	1.82016			1
	LASVPAGGAVAVSAAPGSAAPAAGSAPAAAEEKKDEK	1	1	1	P05387		3274.7	650208	0	0	0	0.001628	High	2.62284					2
	MRYVASYLLAALGGNSSPSAK	1	1	1	P05387	M1(Oxidation)	2172.11	0	0	436541	0.001	0.008878					High	2.34313	1
P04792	Heat shock protein beta-1 OS=Homo sapiens OX=9606 GN=HSPB1 PE=1 SV=2 - [HSPB1_HUMAN]	82.44	1	10	10	69	5.45458e+06	1.21121e+07	1.28414e+07	62.1783	82.44	10	25	49.0009	67.8	8	20	54.9784	67.8	8	24	205	22.7685	6.40479
	Sequence	# PSMs	# Proteins	# Protein Groups	Protein Group Accessions	Modifications	MH+ [Da]	A5: Area	B5: Area	C5: Area	q-Value	PEP	A2	XCorr A2	B2	XCorr B2	C2	XCorr C2	# Missed Cleavages
	VSLDVNHFAPDELTVK	10	1	1	P04792		1783.93	6.13852e+06	1.45588e+07	1.4409e+07	0	7.792e-06	High	4.72686	High	4.93606	High	4.72518	0
	LFDQAFGLPR	8	1	1	P04792		1163.62	6.94129e+06	1.41277e+07	1.62127e+07	0	1.129e-06	High	4.31153	High	4.11137	High	4.38072	0
	LATQSNEITIPVTFESR	11	1	1	P04792		1906	1.84887e+06	7.64984e+06	7.90236e+06	0	6.074e-05	High	3.83829	High	3.56206	High	3.98154	0
	YTLPPGVDPTQVSSSLSPEGTLTVEAPMPK	3	1	1	P04792		3098.57	400267	1.31951e+06	0	0	0.000483	High	3.76462	High	2.57231	High	1.76796	0
	KYTLPPGVDPTQVSSSLSPEGTLTVEAPMPK	8	1	1	P04792		3226.66	1.6468e+06	3.46016e+06	3.08705e+06	0	0.0006074	High	3.6426	High	3.27928	High	3.18617	1
	LPEEWSQWLGGSSWPGYVRPLPPAAIESPAVAAPAYSR	11	1	1	P04792		4093.06	3.28393e+06	3.9988e+06	3.56051e+06	0	4.85e-05	High	3.62135	High	2.18625	High	2.26917	0
	AQLGGPEAAKSDETAAK	9	1	1	P04792		1643.82	1.19451e+06	0	6.92825e+06	0	1.702e-05	High	2.55774	High	2.2767	High	3.27091	1
	QLSSGVSEIR	7	1	1	P04792		1075.58	720489	1.22248e+06	1.76561e+06	0	0.0007809	High	2.48198	High	3.12975	High	3.44391	0
	GPSWDPFRDWYPHSR	1	1	1	P04792		1902.87	366301	0	0	0.001	0.00756	High	1.25033					1
	TKDGVVEITGKHEER	1	1	1	P04792		1697.88	184530	0	0	0.002	0.02729	High	2.42531					2
P14136	Glial fibrillary acidic protein OS=Homo sapiens OX=9606 GN=GFAP PE=1 SV=1 - [GFAP_HUMAN]	82.18	1	57	57	707	4.66533e+07	1.16908e+08	1.23741e+08	706.638	79.63	51	235	745.741	80.32	52	236	732.138	80.32	50	236	432	49.8496	5.51611
	Sequence	# PSMs	# Proteins	# Protein Groups	Protein Group Accessions	Modifications	MH+ [Da]	A5: Area	B5: Area	C5: Area	q-Value	PEP	A2	XCorr A2	B2	XCorr B2	C2	XCorr C2	# Missed Cleavages
	TQYEAMASSNMHEAEEWYR	21	1	1	P14136		2332.97	1.36328e+07	3.40635e+07	3.36694e+07	0	1.293e-09	High	6.2223	High	5.0119	High	6.44205	0
	KLLEGEENRITIPVQTFSNLQIR	8	1	1	P14136		2698.49	7.02124e+06	1.12439e+07	1.13722e+07	0	3.095e-09	High	5.35999	High	3.06893	High	3.84503	2
	LEVERDNLAQDLATVR	26	1	1	P14136		1841.98	2.98093e+07	8.40066e+07	9.46407e+07	0	1.081e-07	High	5.32381	High	5.43732	High	5.37833	1
	FLEQQNKALAAELNQLR	4	1	1	P14136		1986.08	696523	1.99116e+06	1.94523e+06	0	1.636e-08	High	5.2352	High	3.63399	High	3.25293	1
	AKEPTKLADVYQAELR	14	1	1	P14136		1831.99	5.25865e+06	1.35611e+07	1.40552e+07	0	3.859e-09	High	5.21927	High	3.91517	High	4.87831	2
	LEEEGQSLKDEMAR	22	1	1	P14136		1634.77	4.61531e+07	1.51885e+08	1.49306e+08	0	3.065e-08	High	5.01305	High	5.40663	High	5.46212	1
	ITIPVQTFSNLQIR	27	1	1	P14136		1629.93	2.18051e+07	4.80181e+07	4.78574e+07	0	2.222e-09	High	4.97095	High	3.87859	High	3.94507	0
	HLQEYQDLLNVK	31	1	1	P14136		1499.79	3.67999e+07	6.2835e+07	6.49285e+07	0	6.101e-08	High	4.95954	High	5.34311	High	5.14166	0
	LLEGEENRITIPVQTFSNLQIR	6	1	1	P14136		2570.4	1.66728e+06	2.24032e+06	2.22348e+06	0	8.679e-08	High	4.95624	High	3.5212	High	3.77849	1
	SYVSSGEMMVGGLAPGR	7	1	1	P14136		1697.8	1.37834e+06	3.54184e+06	3.59869e+06	0	1.358e-09	High	4.9179	High	4.40358	High	4.08336	0
	ALAAELNQLR	37	1	1	P14136		1098.63	5.70071e+07	1.14834e+08	1.27275e+08	0	7.39e-08	High	4.66773	High	4.29157	High	4.33899	0
	SKFADLTDAAAR	36	1	1	P14136		1265.65	1.19876e+07	2.37148e+07	2.68729e+07	0	3.403e-06	High	4.64375	High	4.40412	High	4.59735	1
	ASERAEMMELNDRFASYIEK	5	1	1	P14136		2390.11	1.90495e+06	1.49488e+06	5.05986e+06	0	5.33e-07	High	4.56545	High	3.3889	High	2.41469	2
	DNLAQDLATVR	6	1	1	P14136		1215.63	2.51102e+06	8.12105e+06	8.39357e+06	0	1.296e-07	High	4.55984	High	4.26669	High	4.12257	0
	AEMMELNDRFASYIEK	8	1	1	P14136		1946.91	4.40089e+06	1.73588e+07	17942227	0	9.348e-05	High	4.44934	High	4.81821	High	4.17571	1
	LQDETNLRLEAENNLAAYRQEADEATLAR	6	1	1	P14136		3317.64	3.33131e+06	9.06013e+06	8.29909e+06	0	6.899e-10	High	4.35064	High	3.37282	High	2.87411	2
	VDFSLAGALNAGFK	4	1	1	P14136		1409.75	81915.5	0	0	0	5.851e-06	High	4.32126					0
	LEAENNLAAYRQEADEATLAR	11	1	1	P14136		2348.15	8.53723e+06	2.75237e+07	2.94994e+07	0	9.221e-07	High	4.30025	High	3.95114	High	4.18641	1
	ASERAEMMELNDR	10	1	1	P14136		1551.69	1.55814e+06	6.39404e+06	6.83001e+06	0	8.304e-06	High	4.28469	High	3.69598	High	4.02062	1
	AEMMELNDRFASYIEKVR	3	1	1	P14136		2202.07	759182	1.12157e+06	1.27894e+06	0	8.147e-07	High	4.24159	High	2.5582	High	3.4486	2
	LRLDQLTANSAR	22	1	1	P14136		1357.76	1.71554e+07	4.19357e+07	4.55699e+07	0	1.6e-06	High	4.15504	High	4.53846	High	4.43144	1
	KIESLEEEIR	23	1	1	P14136		1245.67	1.51962e+07	2.59281e+07	2.80942e+07	0	7.443e-07	High	4.12373	High	4.50453	High	4.47749	1
	LADVYQAELR	6	1	1	P14136		1177.62	17254860	43039407	46730839	0	5.905e-05	High	4.11768	High	4.13212	High	4.11851	0
	EAASYQEALAR	29	1	1	P14136		1208.59	2.46909e+07	6.84735e+07	8.0319e+07	0	5.866e-07	High	4.08579	High	3.95549	High	4.0116	0
	RSYVSSGEMMVGGLAPGR	3	1	1	P14136		1853.91	249325	2.22598e+06	2.29403e+06	0	0.0001472	High	4.07642	High	2.62091	High	2.70321	1
	QLQSLTCDLESLR	15	1	1	P14136	C7(Carbamidomethyl)	1562.79	1.09026e+07	1.99629e+07	1.77798e+07	0	8.84e-07	High	4.02291	High	4.43532	High	4.3934	0
	FADLTDAAAR	22	1	1	P14136		1050.52	2.78777e+07	7.37696e+07	9.11831e+07	0	3.263e-05	High	4.00872	High	4.19109	High	4.0345	0
	LEAENNLAAYR	6	1	1	P14136		1263.63	1.73595e+06	4.88417e+06	4.98711e+06	0	1.286e-06	High	3.96336	High	4.32991	High	4.30471	0
	EAASYQEALARLEEEGQSLKDEMAR	4	1	1	P14136		2824.34	3.73473e+06	0	0	0	4.731e-07	High	3.84352					2
	TVEMRDGEVIKESK	3	1	1	P14136	M4(Oxidation)	1636.82	1.0571e+06	4.03754e+06	0	0	3.905e-06	High	3.77664	High	2.98148			2
	TVEMRDGEVIKESK	24	1	1	P14136		1620.83	3.43693e+06	9.43992e+06	1.19857e+07	0	2.787e-05	High	3.75994	High	3.9417	High	3.43603	2
	IESLEEEIR	5	1	1	P14136		1117.58	1.11166e+06	3.06064e+06	3.07131e+06	0	2.557e-05	High	3.7382	High	3.02759	High	3.17967	0
	IHEEEVRELQEQLAR	12	1	1	P14136		1878.97	5.0805e+06	1.40138e+07	1.37411e+07	0	3.45e-06	High	3.71993	High	3.69399	High	4.08287	1
	KIHEEEVRELQEQLAR	11	1	1	P14136		2007.07	2.97802e+06	1.59902e+07	1.55529e+07	0	0.000321	High	3.50044	High	3.2257	High	3.09702	2
	RQLQSLTCDLESLRGTNESLER	2	1	1	P14136	C8(Carbamidomethyl)	2605.3	388308	0	0	0	0.0003279	High	3.48365					2
	SYVSSGEMMVGGLAPGRR	10	1	1	P14136		1853.9	9.92295e+06	3.51078e+07	3.69873e+07	0	0.0004376	High	3.35015	High	3.63605	High	4.5777	1
	LDQLTANSAR	20	1	1	P14136		1088.57	575375	804518	1.76034e+06	0	1.651e-05	High	3.34796	High	4.21202	High	4.22418	0
	AEMMELNDR	26	1	1	P14136		1108.48	5.96971e+06	1.04192e+07	1.4632e+07	0	6.996e-05	High	3.31652	High	3.48124	High	3.39404	0
	LEAENNLAAYRQEADEATLARLDLER	2	1	1	P14136		2974.49	1.37671e+06	0	0	0	7.901e-05	High	3.30582					2
	QQVHVELDVAKPDLTAALK	16	1	1	P14136		2075.16	5.96604e+06	2.84807e+07	2.9185e+07	0	6.439e-06	High	3.21543	High	2.61303	High	3.22973	0
	QLQSLTCDLESLRGTNESLER	15	1	1	P14136	C7(Carbamidomethyl)	2449.22	2.46209e+07	6.20728e+07	5.71942e+07	0	0.004452	High	3.17035	High	2.84386	High	3.43561	1
	EPTKLADVYQAELR	4	1	1	P14136		1632.86	1.02777e+06	214988	226500	0	0.0001296	High	2.97915	High	2.36667	High	2.1866	1
	KIESLEEEIRFLR	2	1	1	P14136		1661.92	1.06384e+06	0	0	0	0.0002688	High	2.96812					2
	TQYEAMASSNMHEAEEWYR	9	1	1	P14136	M11(Oxidation)	2348.95	561116	2.96867e+06	3.0129e+06	0	8.602e-06	High	2.88038	High	3.75001	High	3.42519	0
	FASYIEKVR	3	1	1	P14136		1112.61	508610	1.42365e+06	0	0	0.0001126	High	2.84127	High	1.7485			1
	TVEMRDGEVIK	6	1	1	P14136		1276.66	334853	326850	536008	0	0.003639	High	2.52814	High	3.07751	High	2.94208	1
	LADVYQAELRELR	5	1	1	P14136		1575.85	2.09371e+06	6.7159e+06	6.95912e+06	0	0.005221	High	2.48059	High	3.28189	High	2.48786	1
	QKLQDETNLR	13	1	1	P14136		1244.66	0	4.35764e+06	5.41772e+06	0	0.0009082	High	2.43021	High	2.95322	High	2.45897	1
	VDFSLAGALNAGFKETR	11	1	1	P14136		1795.94	508060	4.59777e+06	4.18831e+06	0	0.0002423	High	2.36206	High	3.23078	High	3.56924	1
	LEEEGQSLKDEMAR	9	1	1	P14136	M12(Oxidation)	1650.77	942047	6.17188e+06	6.73679e+06	0	0.000421	High	2.33687	High	2.59713	High	2.60373	1
	QQVHVELDVAKPDLTAALKEIR	5	1	1	P14136		2473.38	654219	2.46986e+06	2.58331e+06	0	0.0005832	High	1.95338	High	2.02438	High	2.35403	1
	SYVSSGEMMVGGLAPGRR	3	1	1	P14136	M8(Oxidation)	1869.9	0	2795712	3.92112e+06	0	0.002976	High	1.86794	High	2.32399	High	2.09706	1
	QEADEATLAR	18	1	1	P14136		1103.54	325619	554683	977498	0	0.001551	High	1.80727	High	3.08148	High	3.45879	0
	MPPPLPTRVDFSLAGALNAGFK	8	1	1	P14136		2299.23	0	2.94896e+06	2.60525e+06	0	9.955e-05	High	1.47235	High	2.06853	High	2.49537	1
	RSYVSSGEMMVGGLAPGRR	2	1	1	P14136		2010	0	3.78007e+06	4.13987e+06	0	1.79e-05			High	4.79682	High	4.54656	2
	AEMMELNDR	12	1	1	P14136	M3(Oxidation)	1124.47	0	0	905621	0	0.001021			High	3.58062	High	3.47477	0
	RQLQSLTCDLESLR	2	1	1	P14136	C8(Carbamidomethyl)	1718.89	0	492256	543572	0	4.168e-06			High	3.54507	High	3.48094	1
	LALDIEIATYRK	4	1	1	P14136		1405.81	0	4.07463e+06	4.21367e+06	0	9.066e-05			High	3.51429	High	3.41382	1
	LQDETNLRLEAENNLAAYR	2	1	1	P14136		2233.12	0	1.40601e+06	1.40897e+06	0	2.608e-05			High	3.4063	High	3.06833	1
	KLLEGEENR	9	1	1	P14136		1087.58	0	0	409620	0	0.001404			High	2.83746	High	3.1139	1
	ASERAEMMELNDR	2	1	1	P14136	M8(Oxidation)	1567.69	0	951238	1.06348e+06	0	3.22e-06			High	2.52363	High	3.51145	1
	QKLQDETNLRLEAENNLAAYR	3	1	1	P14136		2489.28	0	748056	4.23214e+06	0	0.002466			High	2.18299	High	2.9078	2
	SYVSSGEMMVGGLAPGR	1	1	1	P14136	M8(Oxidation)	1713.8	0	0	267564	0	0.003027					High	3.1926	0
	AEMMELNDRFASYIEK	2	1	1	P14136	M3(Oxidation)	1962.89	184210	1.03419e+06	0	0.001	0.0176	High	2.19298	High	2.91138			1
	MPPPLPTRVDFSLAGALNAGFKETR	4	1	1	P14136		2685.42	0	4.18265e+06	0	0.003	0.03424	High	1.739	High	2.03139			2
P01834	Immunoglobulin kappa constant OS=Homo sapiens OX=9606 GN=IGKC PE=1 SV=2 - [IGKC_HUMAN]	81.31	1	6	6	76	1.48991e+06	5.34668e+06	5.62972e+06	72.4493	81.31	5	22	79.0226	81.31	6	29	74.8045	81.31	6	25	107	11.7578	6.52197
	Sequence	# PSMs	# Proteins	# Protein Groups	Protein Group Accessions	Modifications	MH+ [Da]	A5: Area	B5: Area	C5: Area	q-Value	PEP	A2	XCorr A2	B2	XCorr B2	C2	XCorr C2	# Missed Cleavages
	VYACEVTHQGLSSPVTK	7	1	1	P01834	C4(Carbamidomethyl)	1875.93	2.03984e+06	7.61228e+06	7.92416e+06	0	3.93e-05	High	4.99807	High	4.96788	High	4.65939	0
	SGTASVVCLLNNFYPR	14	1	1	P01834	C8(Carbamidomethyl)	1797.9	1.66496e+06	4.20284e+06	4.57031e+06	0	8.454e-07	High	4.76165	High	4.59084	High	4.80064	0
	TVAAPSVFIFPPSDEQLK	45	1	1	P01834		1946.03	594166	2.16382e+06	2.95248e+06	0	9.414e-06	High	3.76835	High	3.65247	High	3.89568	0
	HKVYACEVTHQGLSSPVTK	3	1	1	P01834	C6(Carbamidomethyl)	2141.08	764925	4.22493e+06	4.3947e+06	0	7.397e-06	High	3.31775	High	2.17243	High	2.76564	1
	VDNALQSGNSQESVTEQDSKDSTYSLSSTLTLSK	5	1	1	P01834		3619.71	458293	1.48414e+06	1.36967e+06	0	0.001684	High	2.45611	High	3.98133	High	3.47525	1
	VDNALQSGNSQESVTEQDSK	2	1	1	P01834		2135.97	0	99523.4	109316	0	1.813e-06			High	3.47494	High	3.21332	0
P08670	Vimentin OS=Homo sapiens OX=9606 GN=VIM PE=1 SV=4 - [VIME_HUMAN]	79.83	1	45	45	346	1.26099e+07	3.29229e+07	3.4954e+07	327.092	68.03	40	111	371.357	79.83	43	120	354.891	72.32	41	115	466	53.6191	5.12256
	Sequence	# PSMs	# Proteins	# Protein Groups	Protein Group Accessions	Modifications	MH+ [Da]	A5: Area	B5: Area	C5: Area	q-Value	PEP	A2	XCorr A2	B2	XCorr B2	C2	XCorr C2	# Missed Cleavages
	EMEENFAVEAANYQDTIGR	11	1	1	P08670		2186.97	4.4566e+06	1.10949e+07	1.05288e+07	0	1.773e-12	High	6.9382	High	5.5307	High	4.87058	0
	KVESLQEEIAFLK	6	1	1	P08670		1533.85	923242	1.98601e+06	1.94552e+06	0	5.215e-08	High	5.39338	High	4.87247	High	5.04529	1
	LQDEIQNMKEEMAR	11	1	1	P08670		1734.82	9.90696e+06	2.69984e+07	2.89225e+07	0	1.419e-09	High	4.93872	High	5.85401	High	5.2575	1
	LQEEMLQREEAENTLQSFRQDVDNASLAR	7	1	1	P08670		3420.65	3.43654e+06	6.51811e+06	6.66169e+06	0	6.942e-08	High	4.90118	High	3.33367	High	3.41047	2
	TNEKVELQELNDR	15	1	1	P08670		1587.8	2.95718e+06	1.16238e+07	1.16209e+07	0	2.464e-07	High	4.74553	High	4.89086	High	4.38462	1
	ILLAELEQLKGQGK	19	1	1	P08670		1539.91	1.93175e+07	3.95537e+07	4.3162e+07	0	3.273e-08	High	4.69822	High	5.14504	High	4.93396	1
	KVESLQEEIAFLKK	20	1	1	P08670		1661.95	2875772	1.37126e+07	1.60369e+07	0	2.15e-06	High	4.64871	High	4.83928	High	4.28128	2
	LQEEMLQREEAENTLQSFR	4	1	1	P08670		2351.13	1.01918e+06	1.9238e+06	2.43564e+06	0	8.829e-07	High	4.47996	High	4.61625	High	3.9595	1
	ETNLDSLPLVDTHSK	6	1	1	P08670		1668.85	1.45474e+06	5.8773e+06	6.27446e+06	0	2.468e-06	High	4.43504	High	2.62164	High	3.48218	0
	FADLSEAANR	8	1	1	P08670		1093.53	3.09465e+06	5.13075e+06	7.65183e+06	0	1.753e-06	High	4.43299	High	4.36776	High	4.38065	0
	EEAENTLQSFRQDVDNASLAR	8	1	1	P08670		2393.14	3.40463e+06	6.66233e+06	7.19913e+06	0	1.562e-06	High	4.42342	High	3.79855	High	3.95063	1
	VEVERDNLAEDIMR	11	1	1	P08670		1688.83	5.47324e+06	1.34667e+07	1.58667e+07	0	2.225e-07	High	4.36916	High	4.04372	High	3.4182	1
	EKLQEEMLQREEAENTLQSFR	3	1	1	P08670		2608.27	522907	676691	782650	0	5.23e-05	High	4.28901	High	2.88068	High	3.21458	2
	SLYASSPGGVYATR	8	1	1	P08670		1428.72	4.11745e+06	1.19954e+07	1.21669e+07	0	4.612e-07	High	4.15149	High	4.69008	High	5.31775	0
	SRLGDLYEEEMR	8	1	1	P08670		1497.7	636607	2.04527e+06	2.19781e+06	0	1.917e-06	High	4.08957	High	4.22393	High	4.02347	1
	ISLPLPNFSSLNLR	20	1	1	P08670		1570.9	8.6052e+06	1.63832e+07	1.67895e+07	0	7.122e-05	High	4.02463	High	3.68082	High	3.41405	0
	HLREYQDLLNVK	7	1	1	P08670		1527.83	3.8079e+06	1.00312e+07	1.04333e+07	0	3.38e-07	High	3.91404	High	4.18485	High	4.52909	1
	LGDLYEEEMR	9	1	1	P08670		1254.57	5.99682e+06	1.27721e+07	1.32722e+07	0	1.947e-05	High	3.90812	High	3.89365	High	3.70173	0
	NLQEAEEWYK	9	1	1	P08670		1309.61	5.84633e+06	1.57331e+07	1.5789e+07	0	4.829e-05	High	3.71945	High	4.15429	High	4.21876	0
	QVQSLTCEVDALKGTNESLER	10	1	1	P08670	C7(Carbamidomethyl)	2377.17	6.38428e+06	3.22166e+07	3.27775e+07	0	5.967e-07	High	3.70552	High	3.79049	High	3.95068	1
	ILLAELEQLK	4	1	1	P08670		1169.71	1.71113e+06	2.71341e+06	2.73731e+06	0	4.969e-06	High	3.66393	High	3.60476	High	3.7323	0
	DGQVINETSQHHDDLE	9	1	1	P08670		1836.8	2.69155e+06	1.06927e+07	1.0785e+07	0	1.096e-06	High	3.56724	High	3.90782	High	4.3274	0
	FADLSEAANRNNDALR	9	1	1	P08670		1776.86	5.48583e+06	2.36731e+07	2.34759e+07	0	1.626e-05	High	3.51331	High	3.57157	High	3.63248	1
	VEVERDNLAEDIMR	3	1	1	P08670	M13(Oxidation)	1704.83	336910	1.54907e+06	1.41771e+06	0	5.107e-06	High	3.50838	High	3.36546	High	3.22665	1
	EEAENTLQSFR	5	1	1	P08670		1323.62	687633	2.16867e+06	2.26764e+06	0	0.0001544	High	3.41152	High	3.88992	High	3.48719	0
	TVETRDGQVINETSQHHDDLE	7	1	1	P08670		2423.11	547038	2.71762e+06	470847	0	1.86e-05	High	3.25893	High	3.92272	High	3.32073	1
	FANYIDKVR	6	1	1	P08670		1125.61	3.11828e+06	5.40434e+06	5.87113e+06	0	0.0005874	High	3.20721	High	3.08641	High	2.92065	1
	VELQELNDR	7	1	1	P08670		1115.57	117093	1.76282e+06	1.98737e+06	0	0.0003409	High	3.04522	High	3.46846	High	3.29031	0
	DNLAEDIMR	3	1	1	P08670		1076.51	959456	2.66136e+06	2.48737e+06	0	0.0005765	High	3.00957	High	2.95742	High	2.88273	0
	LGDLYEEEMRELR	3	1	1	P08670		1652.8	402464	1.79677e+06	1.9862e+06	0	8.72e-05	High	3.00593	High	2.98144	High	2.64452	1
	ETNLDSLPLVDTHSKR	7	1	1	P08670		1824.95	2.06176e+06	5.92438e+06	6.27137e+06	0	0.0007482	High	2.85623	High	3.35202	High	2.60016	1
	QVQSLTCEVDALK	3	1	1	P08670	C7(Carbamidomethyl)	1490.76	608526	876418	1.0293e+06	0	2.358e-05	High	2.85014	High	3.79909	High	4.31307	0
	TNEKVELQELNDRFANYIDK	2	1	1	P08670		2439.22	731283	0	0	0	0.000335	High	2.7778					2
	SKFADLSEAANRNNDALR	3	1	1	P08670		1991.99	156755	596353	684925	0	0.0003326	High	2.66621	High	1.98316	High	2.486	2
	QDVDNASLAR	9	1	1	P08670		1088.53	0	298332	1.13368e+06	0	6.099e-05	High	2.54898	High	3.384	High	3.35631	0
	EYQDLLNVK	7	1	1	P08670		1121.58	4.32038e+06	1.23245e+07	1.29445e+07	0	0.003464	High	2.54661	High	2.91754	High	2.72342	0
	LLQDSVDFSLADAINTEFK	16	1	1	P08670		2126.07	129147	2.12189e+06	1.66512e+06	0	1.837e-06	High	2.23403	High	4.14563	High	3.28765	0
	TYSLGSALRPSTSR	5	1	1	P08670		1495.79	4.53544e+06	1.39617e+07	1.53109e+07	0	0.0002056	High	1.39234	High	2.78267	High	1.79096	0
	RQVDQLTNDKAR	1	1	1	P08670		1443.77	0	0	0	0	8.079e-06			High	4.51895			2
	EMEENFAVEAANYQDTIGR	1	1	1	P08670	M2(Oxidation)	2202.96	0	708470	0	0	1e-06			High	3.40807			0
	QVDQLTNDKAR	3	1	1	P08670		1287.67	0	1.29607e+06	8.711e+06	0	0.001548			High	3.22275	High	3.7216	1
	LHEEEIQELQAQIQEQHVQIDVDVSKPDLTAALR	2	1	1	P08670		3923.02	0	1.79142e+06	0	0	7.597e-05			High	3.08905			0
	EKLQEEMLQR	2	1	1	P08670		1303.67	0	677750	715473	0	0.0005933			High	2.98849	High	3.3983	1
	QQYESVAAK	22	1	1	P08670		1023.51	0	0	1.6642e+06	0	0.003193			High	2.37499	High	2.49296	0
	VESLQEEIAFLKK	3	1	1	P08670		1533.85	138364	454166	464530	0.001	0.009861	High	1.57921	High	2.50298	High	2.17165	1
	MFGGPGTASRPSSSR	3	1	1	P08670		1494.71	1.70865e+06	6.36814e+06	663351	0.002	0.02795	High	1.24031	High	1.42022	High	2.62068	0
	EMEENFAVEAANYQDTIGRLQDEIQNMKEEMAR	1	1	1	P08670		3902.76	345564	0	0	0.004	0.05505	High	1.67373					2
P02768	Serum albumin OS=Homo sapiens OX=9606 GN=ALB PE=1 SV=2 - [ALBU_HUMAN]	79.8	1	56	56	987	4.96667e+07	1.06682e+08	1.11229e+08	923.027	79.8	53	319	983.805	78.82	52	337	954.069	79.8	53	331	609	69.3215	6.27783
	Sequence	# PSMs	# Proteins	# Protein Groups	Protein Group Accessions	Modifications	MH+ [Da]	A5: Area	B5: Area	C5: Area	q-Value	PEP	A2	XCorr A2	B2	XCorr B2	C2	XCorr C2	# Missed Cleavages
	LVRPEVDVMCTAFHDNEETFLKK	37	1	1	P02768	C10(Carbamidomethyl)	2778.36	4.47808e+07	1.17946e+08	1.23263e+08	0	5.695e-14	High	8.17136	High	5.05857	High	5.90518	1
	SHCIAEVENDEMPADLPSLAADFVESK	34	1	1	P02768	C3(Carbamidomethyl)	2974.35	2.25468e+07	3.99603e+07	3.99156e+07	0	1.563e-13	High	6.49322	High	5.25506	High	5.51953	0
	LVRPEVDVMCTAFHDNEETFLK	7	1	1	P02768	C10(Carbamidomethyl)	2650.27	4.28965e+06	6.39747e+06	6.21389e+06	0	5.983e-09	High	6.26419	High	2.4509	High	2.82954	0
	MPCAEDYLSVVLNQLCVLHEK	24	1	1	P02768	C3(Carbamidomethyl); C16(Carbamidomethyl)	2518.22	6.68649e+06	2.10342e+07	2.11698e+07	0	1.336e-10	High	6.24798	High	5.25567	High	4.79272	0
	AAFTECCQAADKAACLLPK	23	1	1	P02768	C6(Carbamidomethyl); C7(Carbamidomethyl); C15(Carbamidomethyl)	2124.99	1.6191e+07	5.85123e+07	6.15326e+07	0	5.304e-09	High	6.09577	High	5.39753	High	5.4016	1
	RMPCAEDYLSVVLNQLCVLHEK	46	1	1	P02768	C4(Carbamidomethyl); C17(Carbamidomethyl)	2674.32	1.00871e+07	3.91943e+07	3.85698e+07	0	2.536e-09	High	5.80393	High	5.64145	High	5.35251	1
	VFDEFKPLVEEPQNLIK	39	1	1	P02768		2045.1	5.87297e+07	1.03149e+08	1.05851e+08	0	4.263e-10	High	5.56453	High	5.08871	High	4.61199	0
	VHTECCHGDLLECADDRADLAK	19	1	1	P02768	C5(Carbamidomethyl); C6(Carbamidomethyl); C13(Carbamidomethyl)	2585.12	2.89893e+07	9.89503e+07	1.04573e+08	0	1.936e-09	High	5.42617	High	6.18434	High	6.17548	1
	SLHTLFGDKLCTVATLR	25	1	1	P02768	C11(Carbamidomethyl)	1932.04	8.46486e+06	1.82104e+07	1.83955e+07	0	9.722e-09	High	5.39177	High	5.10976	High	4.57169	1
	SHCIAEVENDEMPADLPSLAADFVESKDVCK	11	1	1	P02768	C3(Carbamidomethyl); C30(Carbamidomethyl)	3476.56	1.50896e+07	3.35874e+07	3.41131e+07	0	3.949e-08	High	5.38	High	2.14059	High	3.29167	1
	QNCELFEQLGEYK	5	1	1	P02768	C3(Carbamidomethyl)	1657.75	7.9436e+06	2.01798e+07	2.10141e+07	0	3.85e-08	High	5.31698	High	4.62777	High	4.07445	0
	QEPERNECFLQHKDDNPNLPR	21	1	1	P02768	C8(Carbamidomethyl)	2636.23	1.42407e+07	3.3603e+07	8.18758e+07	0	8.07e-07	High	5.23188	High	3.92518	High	3.56254	2
	RHPYFYAPELLFFAK	14	1	1	P02768		1899	3.88772e+06	6.87567e+06	8.14302e+06	0	7.553e-09	High	4.9968	High	3.92152	High	4.12909	1
	RHPDYSVVLLLR	10	1	1	P02768		1467.84	1.84127e+06	5.2131e+06	5.58378e+06	0	3.587e-08	High	4.90836	High	3.85789	High	3.57633	1
	AEFAEVSKLVTDLTK	6	1	1	P02768		1650.9	1.07391e+06	2.71196e+06	2.44203e+06	0	2.462e-07	High	4.85484	High	3.3884	High	4.87098	1
	ALVLIAFAQYLQQCPFEDHVK	23	1	1	P02768	C14(Carbamidomethyl)	2490.29	3.87002e+06	8.97206e+06	7.64398e+06	0	2.525e-08	High	4.79389	High	3.76977	High	2.85481	0
	YKAAFTECCQAADK	11	1	1	P02768	C8(Carbamidomethyl); C9(Carbamidomethyl)	1662.73	1.13584e+06	7.54768e+06	8.1251e+06	0	8.707e-07	High	4.75572	High	4.7278	High	4.72095	1
	KVPQVSTPTLVEVSR	23	1	1	P02768		1639.94	3.31471e+07	6.97357e+07	7.24893e+07	0	9.974e-08	High	4.73385	High	4.09141	High	4.05724	1
	LKECCEKPLLEK	58	1	1	P02768	C4(Carbamidomethyl); C5(Carbamidomethyl)	1546.8	1.74748e+07	4.03807e+07	5.34942e+07	0	1.543e-05	High	4.64374	High	4.43206	High	4.01886	1
	RPCFSALEVDETYVPK	14	1	1	P02768	C3(Carbamidomethyl)	1910.94	7.55825e+06	3.71761e+07	3.98535e+07	0	4.837e-05	High	4.59409	High	4.52298	High	4.62078	0
	HPYFYAPELLFFAK	13	1	1	P02768		1742.9	1.84929e+06	3.87444e+06	3.76408e+06	0	6.699e-08	High	4.56268	High	3.48498	High	3.09811	0
	TCVADESAENCDKSLHTLFGDKLCTVATLR	11	1	1	P02768	C2(Carbamidomethyl); C11(Carbamidomethyl); C24(Carbamidomethyl)	3411.6	7.19394e+06	1.22419e+07	2.45515e+07	0	1.278e-09	High	4.54222	High	3.19108	High	2.93742	2
	VHTECCHGDLLECADDR	4	1	1	P02768	C5(Carbamidomethyl); C6(Carbamidomethyl); C13(Carbamidomethyl)	2086.84	531656	2.55322e+06	0	0	7.051e-08	High	4.44364	High	3.91588			0
	KQTALVELVK	15	1	1	P02768		1128.7	2.58953e+06	5.02424e+06	6.01615e+06	0	3.729e-07	High	4.3215	High	3.80971	High	3.7771	1
	AVMDDFAAFVEK	20	1	1	P02768		1342.64	4.54896e+07	8.27679e+07	8.71272e+07	0	7.235e-07	High	4.29053	High	4.34912	High	4.49355	0
	YICENQDSISSK	19	1	1	P02768	C3(Carbamidomethyl)	1443.65	1.33705e+07	3.98209e+07	5.35287e+07	0	1.797e-07	High	4.1855	High	4.9024	High	4.92018	0
	TCVADESAENCDK	43	1	1	P02768	C2(Carbamidomethyl); C11(Carbamidomethyl)	1498.58	1.15861e+06	0	6.80639e+06	0	8.474e-10	High	4.1	High	4.95149	High	4.78712	0
	AVMDDFAAFVEK	8	1	1	P02768	M3(Oxidation)	1358.63	373862	1.36336e+06	1.4017e+06	0	8.21e-07	High	4.08	High	4.75835	High	4.50138	0
	QNCELFEQLGEYKFQNALLVR	24	1	1	P02768	C3(Carbamidomethyl)	2599.3	1.02979e+07	2.83032e+07	2.66642e+07	0	1.019e-06	High	4.02483	High	4.22119	High	4.09209	1
	LVNEVTEFAK	14	1	1	P02768		1149.62	3.31152e+07	8.32619e+07	8.93027e+07	0	1.739e-05	High	3.71576	High	3.94325	High	3.84365	0
	YKAAFTECCQAADKAACLLPK	5	1	1	P02768	C8(Carbamidomethyl); C9(Carbamidomethyl); C17(Carbamidomethyl)	2416.14	930683	3.0336e+06	4.23896e+06	0	0.0002011	High	3.67525	High	3.76845	High	2.50998	2
	FKDLGEENFK	24	1	1	P02768		1226.61	1.65694e+07	3.83386e+07	4.11791e+07	0	0.0009137	High	3.61087	High	3.78212	High	3.81839	1
	VPQVSTPTLVEVSR	12	1	1	P02768		1511.85	2.36272e+06	6.31153e+06	6.47627e+06	0	6.136e-07	High	3.58352	High	4.04358	High	4.14657	0
	AAFTECCQAADK	23	1	1	P02768	C6(Carbamidomethyl); C7(Carbamidomethyl)	1371.57	3.65633e+06	5.70418e+06	12783699	0	1.158e-05	High	3.51663	High	4.35043	High	4.31484	0
	ETYGEMADCCAK	21	1	1	P02768	C9(Carbamidomethyl); C10(Carbamidomethyl)	1434.54	5.40746e+06	1.67562e+07	2.2275e+07	0	4.128e-05	High	3.47898	High	4.15512	High	3.82974	0
	LCTVATLRETYGEMADCCAK	3	1	1	P02768	C2(Carbamidomethyl); C17(Carbamidomethyl); C18(Carbamidomethyl)	2349.04	339388	815442	811307	0	2.247e-06	High	3.47292	High	3.30006	High	2.96669	1
	DVFLGMFLYEYAR	12	1	1	P02768	M6(Oxidation)	1639.78	303933	1.11988e+06	1.59687e+06	0	3.182e-06	High	3.43813	High	3.38111	High	3.12229	0
	CCTESLVNR	39	1	1	P02768	C1(Carbamidomethyl); C2(Carbamidomethyl)	1138.5	5.36736e+06	5.72591e+06	1.02945e+07	0	1.917e-05	High	3.35179	High	3.84881	High	3.93821	0
	LDELRDEGKASSAK	5	1	1	P02768		1518.78	976426	3.00268e+06	2.67623e+06	0	0.0001792	High	3.34386	High	3.72914	High	3.21932	2
	ADDKETCFAEEGKK	34	1	1	P02768	C7(Carbamidomethyl)	1627.74	829817	3.50631e+06	2.01396e+07	0	6.763e-06	High	3.3123	High	4.38167	High	4.91388	2
	LVAASQAALGL	14	1	1	P02768		1013.6	8.63584e+06	2.17361e+07	2.03068e+07	0	7.224e-06	High	3.29133	High	3.72821	High	3.6913	0
	CCAAADPHECYAK	39	1	1	P02768	C1(Carbamidomethyl); C2(Carbamidomethyl); C10(Carbamidomethyl)	1552.6	2.48526e+06	17001907	13393993	0	2.959e-08	High	3.2091	High	4.63786	High	4.02038	0
	MPCAEDYLSVVLNQLCVLHEKTPVSDR	3	1	1	P02768	C3(Carbamidomethyl); C16(Carbamidomethyl)	3173.54	0	0	2.24957e+06	0	4.17e-07	High	3.09212			High	1.78062	1
	CCTESLVNRRPCFSALEVDETYVPK	6	1	1	P02768	C1(Carbamidomethyl); C2(Carbamidomethyl); C12(Carbamidomethyl)	3030.42	2.67686e+06	7.38203e+06	6.9855e+06	0	0.0005434	High	3.05918	High	2.39748	High	3.24095	1
	EQLKAVMDDFAAFVEK	9	1	1	P02768		1840.92	872176	1.81708e+06	1.73846e+06	0	2.817e-05	High	3.00969	High	2.1304	High	2.85392	1
	KLVAASQAALGL	3	1	1	P02768		1141.69	351692	809832	815369	0	0.005518	High	2.91907	High	3.12993	High	3.25693	1
	LVRPEVDVMCTAFHDNEETFLKK	6	1	1	P02768	M9(Oxidation); C10(Carbamidomethyl)	2794.36	871323	5.49896e+06	6.04418e+06	0	4.437e-05	High	2.88426	High	2.75538	High	2.99844	1
	HPYFYAPELLFFAKR	2	1	1	P02768		1899	3.88772e+06	0	0	0	9.304e-06	High	2.83589					1
	NECFLQHKDDNPNLPR	6	1	1	P02768	C3(Carbamidomethyl)	1996.94	1.15294e+06	3.38966e+06	3.39823e+06	0	2.469e-05	High	2.71349	High	3.81084	High	3.40184	1
	RHPYFYAPELLFFAKR	3	1	1	P02768		2055.1	160751	590214	725524	0	0.001317	High	2.58449	High	2.80937	High	2.61413	2
	EFNAETFTFHADICTLSEKER	3	1	1	P02768	C14(Carbamidomethyl)	2545.17	0	1.62103e+06	1.53651e+06	0	0.0001926	High	2.45073	High	3.29829	High	2.59333	1
	SHCIAEVENDEMPADLPSLAADFVESKDVCK	3	1	1	P02768	C3(Carbamidomethyl); M12(Oxidation); C30(Carbamidomethyl)	3492.56	855871	0	2.33011e+06	0	0.0007707	High	2.35213			High	2.57311	1
	QTALVELVK	24	1	1	P02768		1000.6	1.59613e+07	2.58143e+07	2.93844e+07	0	0.0005471	High	2.29763	High	2.80854	High	2.65449	0
	MPCAEDYLSVVLNQLCVLHEK	5	1	1	P02768	M1(Oxidation); C3(Carbamidomethyl); C16(Carbamidomethyl)	2534.21	178165	1.51048e+06	1.40877e+06	0	6.231e-06	High	2.25393	High	1.90295	High	3.10181	0
	RMPCAEDYLSVVLNQLCVLHEKTPVSDR	3	1	1	P02768	C4(Carbamidomethyl); C17(Carbamidomethyl)	3329.64	521280	0	902882	0	0.003613	High	2.23989			High	2.27049	2
	VFDEFKPLVEEPQNLIKQNCELFEQLGEYK	3	1	1	P02768	C20(Carbamidomethyl)	3683.84	563142	0	1.4396e+06	0	0.007929	High	2.19972			High	2.28356	1
	TCVADESAENCDKSLHTLFGDK	6	1	1	P02768	C2(Carbamidomethyl); C11(Carbamidomethyl)	2497.11	469420	7.1179e+06	5.37529e+06	0	0.002085	High	2.04024	High	3.33113	High	3.44063	1
	RMPCAEDYLSVVLNQLCVLHEK	4	1	1	P02768	M2(Oxidation); C4(Carbamidomethyl); C17(Carbamidomethyl)	2690.32	345061	4.11802e+06	3.75031e+06	0	0.0001164	High	2.01233	High	2.2799	High	2.77702	1
	RPCFSALEVDETYVPKEFNAETFTFHADICTLSEKER	1	1	1	P02768	C3(Carbamidomethyl); C30(Carbamidomethyl)	4437.09	0	0	0	0	7.742e-05			High	3.63925			2
	LDELRDEGK	28	1	1	P02768		1074.54	0	4.52627e+06	6.09034e+06	0	0.003762			High	3.07499	High	3.00381	1
	ETYGEMADCCAK	11	1	1	P02768	M6(Oxidation); C9(Carbamidomethyl); C10(Carbamidomethyl)	1450.53	0	224998	273199	0	0.000154			High	2.51654	High	2.73809	0
	ECCEKPLLEK	4	1	1	P02768	C2(Carbamidomethyl); C3(Carbamidomethyl)	1305.62	0	884933	1.12258e+06	0	0.004124			High	2.01532	High	1.80521	0
	DVFLGMFLYEYAR	2	1	1	P02768		1623.79	0	598981	0	0.001	0.0113			High	1.74271			0
P00568	Adenylate kinase isoenzyme 1 OS=Homo sapiens OX=9606 GN=AK1 PE=1 SV=3 - [KAD1_HUMAN]	76.8	1	20	20	317	2.64757e+07	6.00751e+07	6.28941e+07	315.23	76.8	19	118	271.061	65.98	15	101	260.172	74.23	18	98	194	21.6213	8.63135
	Sequence	# PSMs	# Proteins	# Protein Groups	Protein Group Accessions	Modifications	MH+ [Da]	A5: Area	B5: Area	C5: Area	q-Value	PEP	A2	XCorr A2	B2	XCorr B2	C2	XCorr C2	# Missed Cleavages
	KVNAEGSVDSVFSQVCTHLDALK	19	1	1	P00568	C16(Carbamidomethyl)	2504.24	1.01011e+07	2.18998e+07	2.27298e+07	0	2.628e-13	High	7.59273	High	5.66496	High	6.38507	1
	IGQPTLLLYVDAGPETMTQR	25	1	1	P00568		2203.15	8.17013e+06	1.51677e+07	1.34553e+07	0	4.771e-12	High	7.25629	High	5.35913	High	5.23445	0
	IGQPTLLLYVDAGPETMTQR	10	1	1	P00568	M17(Oxidation)	2219.14	1.252e+06	3.33011e+06	3.38447e+06	0	3.107e-07	High	5.15167	High	4.23391	High	5.63793	0
	GQLVPLETVLDMLR	56	1	1	P00568		1583.88	1.99188e+07	4.8387e+07	4.91113e+07	0	4.637e-08	High	4.64786	High	3.56576	High	3.79015	0
	RIGQPTLLLYVDAGPETMTQR	7	1	1	P00568		2359.25	2.65729e+06	4.09093e+06	4.14021e+06	0	1.766e-08	High	4.50006	High	3.07825	High	4.14701	1
	TKIIFVVGGPGSGK	7	1	1	P00568		1359.8	1.14564e+06	2.19168e+06	2.00156e+06	0	1.134e-05	High	4.40516	High	4.59526	High	4.42748	1
	VNAEGSVDSVFSQVCTHLDALK	12	1	1	P00568	C15(Carbamidomethyl)	2376.15	3.92383e+06	1.1178e+07	1.15236e+07	0	9.344e-09	High	4.26097	High	3.0154	High	3.42512	0
	IIFVVGGPGSGK	17	1	1	P00568		1130.66	2.9239e+07	5.44333e+07	5.72564e+07	0	2.417e-07	High	4.18966	High	4.14034	High	4.12574	0
	IIFVVGGPGSGKGTQCEK	9	1	1	P00568	C16(Carbamidomethyl)	1833.95	6.65628e+06	1.91066e+07	1.97992e+07	0	5.16e-07	High	4.18684	High	3.86519	High	3.93211	1
	YGYTHLSTGDLLR	13	1	1	P00568		1495.76	2.13692e+07	55908481	5.71857e+07	0	7.507e-09	High	3.71613	High	4.51605	High	4.24283	0
	GQLVPLETVLDMLR	26	1	1	P00568	M12(Oxidation)	1599.88	636079	2.16355e+06	2.20554e+06	0	1.27e-05	High	3.68392	High	3.57485	High	3.74567	0
	RIGQPTLLLYVDAGPETMTQR	3	1	1	P00568	M18(Oxidation)	2375.25	290925	833111	793062	0	0.0002694	High	3.61987	High	2.96856	High	2.72639	1
	GFLIDGYPR	29	1	1	P00568		1037.54	2.88188e+07	6.98835e+07	7.42404e+07	0	0.0001409	High	3.51987	High	3.20476	High	3.22903	0
	RGETSGRVDDNEETIK	2	1	1	P00568		1805.86	787369	0	0	0	0.001393	High	3.37521					2
	ATEPVIAFYEK	8	1	1	P00568		1267.66	8.02586e+06	2.6631e+07	2.73677e+07	0	0.000128	High	3.16039	High	3.33612	High	2.93199	0
	ATEPVIAFYEKR	19	1	1	P00568		1423.76	1.63209e+07	5.00374e+07	5.1963e+07	0	4.057e-05	High	3.01332	High	4.05449	High	3.44125	1
	EVQQGEEFER	22	1	1	P00568		1250.57	2.27436e+06	2.91381e+06	9.59811e+06	0	0.0003853	High	2.92588	High	3.52051	High	3.36755	0
	GETSGRVDDNEETIKK	4	1	1	P00568		1777.86	961758	0	9687223	0	0.0004036	High	2.90722			High	2.89904	2
	IVQKYGYTHLSTGDLLR	2	1	1	P00568		1964.06	432463	0	0	0	0.001068	High	2.7338					1
	EVQQGEEFERR	11	1	1	P00568		1406.67	5.00314e+06	1.34227e+06	1.46648e+07	0	0.001946	High	1.8967	High	2.96805	High	2.08833	1
	GQLVPLETVLDMLRDAMVAK	7	1	1	P00568		2199.19	3.79594e+06	2.00065e+07	1.04653e+06	0	0.002995	High	1.77713	High	1.47196	High	1.58735	1
	GQLVPLETVLDMLRDAMVAK	6	1	1	P00568	M12(Oxidation)	2215.18	703634	5.23374e+06	0	0	0.002891	High	1.66668	High	1.25871			1
	TKIIFVVGGPGSGKGTQCEK	2	1	1	P00568	C18(Carbamidomethyl)	2063.1	0	0	505880	0	0.004329	High	1.61773			High	2.79704	2
	GETSGRVDDNEETIK	1	1	1	P00568		1649.77	0	0	120994	0	0.00302					High	1.94634	1
Q6IAA8	Ragulator complex protein LAMTOR1 OS=Homo sapiens OX=9606 GN=LAMTOR1 PE=1 SV=2 - [LTOR1_HUMAN]	75.16	1	8	8	28	1.36966e+06	1.92056e+06	2.05438e+06	29.0154	75.16	8	12	25.6931	65.22	6	8	24.2151	65.22	6	8	161	17.7338	5.14795
	Sequence	# PSMs	# Proteins	# Protein Groups	Protein Group Accessions	Modifications	MH+ [Da]	A5: Area	B5: Area	C5: Area	q-Value	PEP	A2	XCorr A2	B2	XCorr B2	C2	XCorr C2	# Missed Cleavages
	TDEQALLSSILAK	6	1	1	Q6IAA8		1388.77	1.80524e+06	3.18416e+06	3.30912e+06	0	3.225e-08	High	5.46725	High	4.51257	High	4.62912	0
	IAAYAYSALSQIR	6	1	1	Q6IAA8		1426.77	1.01182e+06	1.16158e+06	1.48042e+06	0	2.618e-08	High	4.06379	High	4.38135	High	4.12467	0
	TASNIIDVSAADSQGMEQHEYMDR	3	1	1	Q6IAA8		2668.17	259700	1.01069e+06	1.16751e+06	0	4.478e-05	High	3.07747	High	3.72721	High	2.62836	0
	LAVLSSSLTHWK	4	1	1	Q6IAA8		1341.75	566305	1.17879e+06	1.25802e+06	0	6.565e-05	High	2.72319	High	2.06131	High	2.07548	0
	KLLLDPSSPPTK	4	1	1	Q6IAA8		1295.76	389279	443607	481604	0	0.0002728	High	2.33477	High	3.3233	High	2.92567	1
	KLPPLPSLTSQPHQVLASEPIPFSDLQQVSR	3	1	1	Q6IAA8		3409.86	1.29192e+06	1.39874e+06	1.37361e+06	0	0.001476	High	2.25123	High	2.04897	High	1.54826	1
	LLLDPSSPPTK	1	1	1	Q6IAA8		1167.66	195684	0	0	0.003	0.03413	High	2.50073					0
	ALNGAEPNYHSLPSAR	1	1	1	Q6IAA8		1696.84	172867	0	0	0.007	0.08725	High	1.80578					0
P68371	Tubulin beta-4B chain OS=Homo sapiens OX=9606 GN=TUBB4B PE=1 SV=1 - [TBB4B_HUMAN]	75.06	2	3	29	292	1.20917e+07	2.42922e+07	2.45064e+07	337.519	75.06	28	100	289.861	75.06	28	94	301.806	75.06	28	98	445	49.799	4.89404
	Sequence	# PSMs	# Proteins	# Protein Groups	Protein Group Accessions	Modifications	MH+ [Da]	A5: Area	B5: Area	C5: Area	q-Value	PEP	A2	XCorr A2	B2	XCorr B2	C2	XCorr C2	# Missed Cleavages
	SGPFGQIFRPDNFVFGQSGAGNNWAK	21	4	4	Q9BVA1;P68371;P07437;P04350		2798.34	1.05933e+07	1.42912e+07	1.48109e+07	0	2.084e-15	High	7.58611	High	5.01153	High	4.85653	0
	MREIVHLQAGQCGNQIGAK	8	4	4	Q9BVA1;P07437;P68371;P04350	C12(Carbamidomethyl)	2110.07	2.37176e+06	9.17256e+06	9.71329e+06	0	1.151e-10	High	6.17544	High	4.28173	High	4.93801	1
	FWEVISDEHGIDPTGTYHGDSDLQLER	5	2	2	P68371;P04350		3116.42	7.44797e+06	1.46644e+07	1.37251e+07	0	1.45e-09	High	5.89579	High	2.08926	High	2.51513	0
	GHYTEGAELVDSVLDVVRK	9	3	3	Q9BVA1;P68371;P07437		2087.08	4.32543e+06	5.65183e+06	6.18896e+06	0	4.069e-10	High	5.87441	High	4.73166	High	4.75559	1
	GHYTEGAELVDSVLDVVR	6	3	3	Q9BVA1;P68371;P07437		1958.99	1.61644e+06	3.58853e+06	4.14285e+06	0	2.109e-09	High	5.17333	High	3.95393	High	3.377	0
	MSMKEVDEQMLNVQNK	6	3	3	Q9BVA1;P68371;P07437		1923.9	1.79783e+06	5.29845e+06	5.03962e+06	0	1.244e-08	High	5.01705	High	4.12516	High	4.5277	1
	INVYYNEATGGKYVPR	6	1	1	P68371		1843.94	2.39595e+06	7.12527e+06	7.3929e+06	0	7.375e-08	High	5.00157	High	3.65011	High	4.31408	1
	EIVHLQAGQCGNQIGAK	6	4	4	P68371;P07437;P04350;Q9BVA1	C10(Carbamidomethyl)	1822.92	1.71808e+06	5.73166e+06	6158390	0	4.368e-09	High	4.85775	High	5.19976	High	5.25354	0
	ALTVPELTQQMFDAK	28	2	2	P68371;P04350		1691.87	1.2827e+07	2.47714e+07	2.50373e+07	0	1.302e-11	High	4.81131	High	4.25202	High	4.41604	0
	MSATFIGNSTAIQELFKR	8	2	2	Q9BVA1;P68371		2014.05	4.57727e+06	324581	1.18645e+07	0	7.019e-05	High	4.65952	High	2.70221	High	3.09063	1
	LTTPTYGDLNHLVSATMSGVTTCLR	14	4	4	P04350;P68371;P07437;Q9BVA1	C23(Carbamidomethyl)	2708.34	2.23751e+06	9.27311e+06	9.73205e+06	0	5.001e-07	High	4.42837	High	4.60373	High	4.20104	0
	KEAESCDCLQGFQLTHSLGGGTGSGMGTLLISK	3	4	3	P04350;P68371;P07437	C6(Carbamidomethyl); C8(Carbamidomethyl)	3439.63	1.34015e+06	3.20996e+06	0	0	6.929e-07	High	4.29635	High	1.89546			1
	EVDEQMLNVQNK	9	3	3	P68371;P07437;Q9BVA1		1446.69	2.01071e+06	5.88533e+06	6.23756e+06	0	1.926e-07	High	4.28237	High	4.8307	High	4.81295	0
	NSSYFVEWIPNNVK	14	4	4	P04350;P68371;P07437;Q9BVA1		1696.84	7.131e+06	1.76014e+07	1.87542e+07	0	2.671e-07	High	4.25883	High	4.49079	High	4.28865	0
	IMNTFSVVPSPK	12	3	3	P04350;P68371;P07437		1319.7	1.01262e+07	2.37543e+07	2.38931e+07	0	6.081e-07	High	4.24414	High	4.64625	High	4.46755	0
	MREIVHLQAGQCGNQIGAK	5	4	4	P07437;P04350;P68371;Q9BVA1	M1(Oxidation); C12(Carbamidomethyl)	2126.06	459443	331864	1.81041e+06	0	2.792e-06	High	4.06018	High	4.72702	High	3.0305	1
	LAVNMVPFPR	10	5	4	P04350;P68371;P07437;Q9BVA1		1143.64	7.82768e+06	1.52801e+07	1.54462e+07	0	1.902e-06	High	4.00007	High	4.02392	High	4.01098	0
	LHFFMPGFAPLTSR	15	5	4	P04350;P68371;P07437;Q9BVA1		1620.84	1.00354e+07	1.22471e+07	1.3259e+07	0	2.706e-07	High	3.97912	High	4.29786	High	3.70118	0
	ISEQFTAMFR	7	4	4	P68371;P07437;P04350;Q9BVA1		1229.6	2.58727e+06	4730457	4.51982e+06	0	1.742e-06	High	3.93011	High	4.07875	High	4.17069	0
	INVYYNEATGGK	12	1	1	P68371		1328.65	5.24372e+06	1.18866e+07	1.39105e+07	0	2.483e-06	High	3.79015	High	4.4009	High	3.9084	0
	LHFFMPGFAPLTSR	3	5	4	P04350;P68371;P07437;Q9BVA1	M5(Oxidation)	1636.83	527699	1.4488e+06	1.55992e+06	0	4.653e-06	High	3.78859	High	3.83328	High	3.15064	0
	AVLVDLEPGTMDSVR	9	3	2	P04350;P68371		1601.82	1.28547e+07	2.4351e+07	2.45887e+07	0	3.635e-09	High	3.74283	High	3.93249	High	3.85545	0
	KLAVNMVPFPR	5	5	4	P68371;P07437;P04350;Q9BVA1		1271.73	946917	815151	907395	0	2.361e-06	High	3.61524	High	3.95821	High	4.00744	1
	YLTVAAVFR	3	3	3	P04350;P68371;P07437		1039.6	2.6285e+06	4.45129e+06	4.61691e+06	0	2.496e-05	High	3.11029	High	3.4356	High	3.38904	0
	EAESCDCLQGFQLTHSLGGGTGSGMGTLLISK	12	4	3	P04350;P68371;P07437	C5(Carbamidomethyl); C7(Carbamidomethyl)	3311.54	2.63127e+06	6.3304e+06	6.22601e+06	0	2.376e-05	High	3.0503	High	4.34609	High	4.25393	0
	AVLVDLEPGTMDSVR	3	3	2	P68371;P04350	M11(Oxidation)	1617.82	715486	2.22414e+06	2.19573e+06	0	2.418e-06	High	3.03086	High	2.84748	High	3.66691	0
	FPGQLNADLR	15	5	4	P04350;P68371;P07437;Q9BVA1		1130.6	794914	2.98707e+06	3.49805e+06	0	0.000241	High	2.93425	High	3.27992	High	3.13511	0
	NMMAACDPR	6	5	4	P04350;P68371;P07437;Q9BVA1	C6(Carbamidomethyl)	1065.43	756349	695361	1.64701e+06	0	0.001022	High	2.83547	High	3.01498	High	2.93429	0
	ISEQFTAMFR	3	4	4	P68371;P07437;P04350;Q9BVA1	M8(Oxidation)	1245.6	192067	522730	649840	0	5.147e-06	High	2.6777	High	3.29084	High	3.80689	0
	FPGQLNADLRK	8	5	4	P68371;P07437;P04350;Q9BVA1		1258.69	1.1516e+06	2.83783e+06	0	0	0.005798	High	2.67016	High	2.42751	High	2.4463	1
	TAVCDIPPR	4	5	4	P68371;P07437;P04350;Q9BVA1	C4(Carbamidomethyl)	1028.52	0	0	0	0	0.001449	High	2.28413	High	2.83446	High	3.10384	0
	ALTVPELTQQMFDAK	4	2	2	P04350;P68371	M11(Oxidation)	1707.87	0	924213	987628	0	0.0003692			High	3.41619	High	2.75527	0
	EVDEQMLNVQNK	3	2	2	P68371;P07437	M6(Oxidation)	1462.69	0	190015	247500	0	0.002812			High	3.39207	High	3.71107	0
	IMNTFSVVPSPK	2	3	3	P04350;P68371;P07437	M2(Oxidation)	1335.7	0	540417	0	0	0.0004341			High	2.93335			0
	IREEYPDRIMNTFSVVPSPK	4	2	2	P68371;P07437		2378.22	1.10013e+06	3.43385e+06	3.60272e+06	0.001	0.01851	High	2.76047	High	2.12049	High	2.21002	2
	MSATFIGNSTAIQELFKR	2	1	1	P68371	M1(Oxidation)	2030.04	0	2.20759e+06	1.93869e+06	0.001	0.009664			High	2.24983	High	3.37868	1
	MSATFIGNSTAIQELFK	1	2	2	P68371;Q9BVA1		1857.95	0	0	541672	0.001	0.01159					High	2.13497	0
	EAESCDCLQGFQLTHSLGGGTGSGMGTLLISK	1	3	2	P68371;P07437	C5(Carbamidomethyl); C7(Carbamidomethyl); M25(Oxidation)	3327.54	0	0	340275	0.006	0.07053					High	2.15886	0
P07355	Annexin A2 OS=Homo sapiens OX=9606 GN=ANXA2 PE=1 SV=2 - [ANXA2_HUMAN]	74.34	1	33	33	299	9.93702e+06	2.91406e+07	2.91946e+07	329.769	74.04	31	98	348.378	74.34	30	102	338.218	74.04	28	99	339	38.5798	7.75244
	Sequence	# PSMs	# Proteins	# Protein Groups	Protein Group Accessions	Modifications	MH+ [Da]	A5: Area	B5: Area	C5: Area	q-Value	PEP	A2	XCorr A2	B2	XCorr B2	C2	XCorr C2	# Missed Cleavages
	TDLEKDIISDTSGDFRK	20	1	1	P07355		1939.96	8.65446e+06	2.60265e+07	2.67749e+07	0	5.925e-11	High	6.8942	High	4.97757	High	4.67352	2
	RAEDGSVIDYELIDQDAR	12	1	1	P07355		2064.98	3.40365e+06	1.42328e+07	1.54795e+07	0	1.683e-11	High	6.82662	High	4.83935	High	5.21247	1
	LSLEGDHSTPPSAYGSVK	16	1	1	P07355		1844.91	1.11628e+07	4.22666e+07	4.24578e+07	0	3.76e-10	High	5.74307	High	5.58405	High	5.54096	0
	GLGTDEDSLIEIICSR	19	1	1	P07355	C14(Carbamidomethyl)	1777.86	4.07354e+06	1.05357e+07	1.10641e+07	0	1.411e-08	High	5.25543	High	4.91815	High	5.03382	0
	AEDGSVIDYELIDQDAR	8	1	1	P07355		1908.88	1.05391e+06	4.63087e+06	5.10047e+06	0	3.428e-08	High	5.13827	High	4.89464	High	5.72381	0
	SNAQRQDIAFAYQR	8	1	1	P07355		1667.83	1.46409e+06	5.15453e+06	5.83303e+06	0	2.177e-07	High	4.91947	High	4.23729	High	4.78461	1
	SALSGHLETVILGLLK	24	1	1	P07355		1650.98	4.5067e+06	1.33698e+07	1.42448e+07	0	3.07e-08	High	4.80179	High	4.93874	High	4.5772	0
	GVDEVTIVNILTNR	23	1	1	P07355		1542.85	7.44898e+06	1.39517e+07	1.50292e+07	0	3.242e-08	High	4.78464	High	4.0879	High	3.64893	0
	RAEDGSVIDYELIDQDARDLYDAGVK	7	1	1	P07355		2926.41	961302	1.56695e+06	1.60959e+06	0	1.172e-05	High	4.69287	High	3.02203	High	2.76151	2
	SLYYYIQQDTKGDYQK	11	1	1	P07355		2012.96	3.29227e+06	1.52722e+07	1.38934e+07	0	6.479e-08	High	4.56894	High	5.56617	High	5.60906	1
	TPAQYDASELKASMK	9	1	1	P07355		1639.8	3.90828e+06	1.47148e+07	1.60352e+07	0	5.595e-08	High	4.54556	High	4.93228	High	5.55271	1
	TKGVDEVTIVNILTNR	7	1	1	P07355		1771.99	1.34268e+06	3.85152e+06	4.19576e+06	0	9.568e-09	High	4.48538	High	3.81252	High	3.58871	1
	TNQELQEINR	21	1	1	P07355		1244.62	4.30239e+06	6.88639e+06	1.25515e+07	0	8.072e-06	High	4.2728	High	4.23809	High	4.21543	0
	TDLEKDIISDTSGDFR	9	1	1	P07355		1811.87	1.2342e+06	4.03079e+06	4.03359e+06	0	5.213e-07	High	4.11157	High	4.0566	High	4.85181	1
	TPAQYDASELK	14	1	1	P07355		1222.6	3.98516e+06	1.23423e+07	1.68818e+07	0	9.452e-07	High	4.09693	High	4.52255	High	4.49994	0
	SLYYYIQQDTK	7	1	1	P07355		1421.7	1.7042e+06	4.83443e+06	5.18059e+06	0	2.453e-05	High	4.00931	High	4.3256	High	4.35154	0
	AYTNFDAERDALNIETAIK	13	1	1	P07355		2155.07	9.99381e+06	1.91286e+07	1.83512e+07	0	4.454e-07	High	4.00365	High	4.88336	High	4.24949	1
	SYSPYDMLESIR	3	1	1	P07355		1460.68	2.04952e+06	3.07351e+06	0	0	0.0001762	High	3.70744	High	3.7555			0
	GTDVPKWISIMTER	4	1	1	P07355		1632.85	772057	1.72848e+06	1.84061e+06	0	2.109e-06	High	3.69441	High	3.23677	High	3.61963	1
	SYSPYDMLESIRK	5	1	1	P07355		1588.77	7.26605e+06	3.90613e+06	4.31179e+06	0	1.249e-05	High	3.40029	High	3.57067	High	4.19417	1
	ALLYLCGGDD	6	1	1	P07355	C6(Carbamidomethyl)	1096.5	1.64569e+06	1.95669e+06	1.53072e+06	0	0.000742	High	3.25522	High	3.14696	High	3.24374	0
	QDIAFAYQR	12	1	1	P07355		1111.55	4.70318e+06	1.35583e+07	1.47716e+07	0	0.000125	High	3.19041	High	3.54088	High	3.50395	0
	DALNIETAIK	2	1	1	P07355		1087.6	1.12006e+06	0	0	0	0.0003242	High	3.105					0
	SALSGHLETVILGLLKTPAQYDASELK	3	1	1	P07355		2854.57	234317	0	967524	0	0.002269	High	3.03144			High	2.34912	1
	GRRAEDGSVIDYELIDQDAR	3	1	1	P07355		2278.11	319082	252775	285020	0	0.0003032	High	3.00532	High	2.77042	High	2.99591	2
	EVKGDLENAFLNLVQCIQNKPLYFADR	5	1	1	P07355	C16(Carbamidomethyl)	3194.64	0	6.43939e+06	7.33205e+06	0	3.349e-06	High	2.95522	High	2.39501	High	2.2281	1
	AEDGSVIDYELIDQDARDLYDAGVK	2	1	1	P07355		2770.31	423045	0	0	0	3.573e-05	High	2.81738					1
	DIISDTSGDFRK	3	1	1	P07355		1353.67	538775	802442	809648	0	0.0005423	High	2.78784	High	3.40788	High	3.7538	1
	GDLENAFLNLVQCIQNKPLYFADR	8	1	1	P07355	C13(Carbamidomethyl)	2838.42	477751	3.65548e+06	4.82715e+06	0	0.003515	High	2.68813	High	2.84556	High	2.04536	0
	YKSYSPYDMLESIRK	5	1	1	P07355		1879.92	816572	1.88268e+06	2.01734e+06	0	0.005158	High	2.63599	High	2.46834	High	2.25799	2
	AYTNFDAER	7	1	1	P07355		1086.49	644130	2.03749e+06	3.11344e+06	0	0.0002517	High	2.33256	High	3.09304	High	2.87111	0
	KGTDVPKWISIMTER	1	1	1	P07355		1760.95	0	359856	0	0.001	0.01691			High	2.84652			2
	TPAQYDASELKASMK	1	1	1	P07355	M14(Oxidation)	1655.79	0	983152	0	0.003	0.03475			High	2.94994			1
	AYTNFDAERDALNIETAIKTK	1	1	1	P07355		2384.21	0	444037	0	0.004	0.05204			High	2.51653			2
P06576	ATP synthase subunit beta, mitochondrial OS=Homo sapiens OX=9606 GN=ATP5B PE=1 SV=3 - [ATPB_HUMAN]	73.91	1	25	25	182	8.20379e+06	1.65147e+07	1.66822e+07	186.291	69.19	23	60	193.626	63.33	22	61	205.586	51.61	21	61	529	56.5246	5.40186
	Sequence	# PSMs	# Proteins	# Protein Groups	Protein Group Accessions	Modifications	MH+ [Da]	A5: Area	B5: Area	C5: Area	q-Value	PEP	A2	XCorr A2	B2	XCorr B2	C2	XCorr C2	# Missed Cleavages
	VLDSGAPIKIPVGPETLGR	12	1	1	P06576		1919.1	8.37975e+06	1.89362e+07	1.82158e+07	0	5.129e-08	High	4.86809	High	4.7038	High	4.35211	1
	TVLIMELINNVAK	20	1	1	P06576		1457.84	2.79307e+06	4.61845e+06	4.52346e+06	0	7.977e-08	High	4.84754	High	4.71612	High	4.47778	0
	IPSAVGYQPTLATDMGTMQER	10	1	1	P06576		2266.09	2.64126e+06	1.03529e+07	1.13184e+07	0	8.71e-08	High	4.84338	High	4.9989	High	4.9222	0
	FTQAGSEVSALLGR	8	1	1	P06576		1435.76	2.34739e+06	5.81476e+06	5.82115e+06	0	4.479e-07	High	4.76136	High	5.51567	High	5.72585	0
	IMDPNIVGSEHYDVAR	7	1	1	P06576		1815.88	7.33129e+06	1.86609e+07	1.99302e+07	0	1.578e-08	High	4.72443	High	4.90767	High	4.91022	0
	VALVYGQMNEPPGAR	19	1	1	P06576		1601.82	2.45801e+06	3.82059e+06	2.93121e+06	0	4.591e-08	High	4.63914	High	4.77839	High	5.27293	0
	AIAELGIYPAVDPLDSTSR	14	1	1	P06576		1988.04	1.68511e+06	5.21856e+06	5.63903e+06	0	1.582e-05	High	4.47594	High	4.29319	High	4.61149	0
	FLSQPFQVAEVFTGHMGK	12	1	1	P06576		2023.02	8.90034e+06	1.19471e+07	1.19005e+07	0	3.532e-06	High	4.38211	High	3.38511	High	3.64683	0
	EGNDLYHEMIESGVINLK	6	1	1	P06576		2061	1.15335e+06	2.31493e+06	2.29452e+06	0	2.211e-05	High	4.16356	High	2.68867	High	2.92214	0
	LVLEVAQHLGESTVR	5	1	1	P06576		1650.92	1.19409e+06	4.23617e+06	4.19842e+06	0	7.771e-09	High	4.11787	High	4.71589	High	5.14342	0
	VALTGLTVAEYFR	3	1	1	P06576		1439.79	1.34895e+06	1.70529e+06	1.5802e+06	0	1.607e-07	High	3.93083	High	4.64228	High	4.7655	0
	IMNVIGEPIDER	6	1	1	P06576		1385.71	1.47761e+06	4.01022e+06	3.88927e+06	0	1.942e-05	High	3.84365	High	4.53817	High	4.57296	0
	IPSAVGYQPTLATDMGTMQER	1	1	1	P06576	M15(Oxidation)	2282.08	126065	0	0	0	4.879e-05	High	3.82531					0
	TIAMDGTEGLVR	6	1	1	P06576		1262.64	3.24293e+06	5.79945e+06	5.87444e+06	0	5.918e-07	High	3.76489	High	4.33779	High	4.07411	0
	AHGGYSVFAGVGER	6	1	1	P06576		1406.68	486825	1.49892e+06	1.97819e+06	0	3.246e-07	High	3.70922	High	5.15127	High	4.15967	0
	IMDPNIVGSEHYDVAR	3	1	1	P06576	M2(Oxidation)	1831.87	400898	1.49142e+06	1.57913e+06	0	8.294e-06	High	3.44966	High	3.66729	High	3.02352	0
	TREGNDLYHEMIESGVINLK	6	1	1	P06576		2318.15	650753	1.46178e+06	1.70209e+06	0	4.488e-05	High	3.28132	High	3.72618	High	3.88176	1
	IMNVIGEPIDERGPIKTK	2	1	1	P06576		2010.11	222941	0	567889	0	7.075e-05	High	3.10987			High	1.78412	2
	VVDLLAPYAK	4	1	1	P06576		1088.64	3.12418e+06	7.2454e+06	8.08232e+06	0	0.001183	High	3.0796	High	2.70793	High	2.99562	0
	IGLFGGAGVGK	8	1	1	P06576		975.563	2.52368e+06	4.86635e+06	5.06524e+06	0	0.0001874	High	3.06229	High	3.81549	High	3.74604	0
	QFAPIHAEAPEFMEMSVEQEILVTGIK	4	1	1	P06576		3044.51	0	1.43471e+06	0	0	0.003457	High	2.66513	High	2.02088			0
	KGSITSVQAIYVPADDLTDPAPATTFAHLDATTVLSR	2	1	1	P06576		3842.99	0	1.39415e+06	0	0	0.0005403	High	2.58566	High	2.19426			1
	IMNVIGEPIDERGPIK	3	1	1	P06576		1780.96	2.4323e+06	6.70307e+06	6.92089e+06	0	0.005439	High	2.47904	High	2.12292	High	2.65684	1
	FLSQPFQVAEVFTGHMGK	2	1	1	P06576	M16(Oxidation)	2039.01	903881	1.97356e+06	0	0	0.001243	High	2.39531	High	2.37243			0
	SLQDIIAILGMDELSEEDKLTVSR	4	1	1	P06576		2675.38	445191	0	0	0	9.37e-05	High	2.10123					1
	DQEGQDVLLFIDNIFR	5	1	1	P06576		1921.96	0	230588	273036	0	0.004344			High	1.50178	High	1.62025	0
	GFQQILAGEYDHLPEQAFYMVGPIEEAVAK	2	1	1	P06576		3350.64	129123	0	0	0.001	0.02004	High	1.20347					0
	LVPLKETIK	2	1	1	P06576		1040.67	0	1.37726e+06	1.89636e+06	0.001	0.01796			High	1.85719	High	2.32377	1
P09455	Retinol-binding protein 1 OS=Homo sapiens OX=9606 GN=RBP1 PE=1 SV=2 - [RET1_HUMAN]	73.33	1	7	7	26	2.45755e+06	4.5275e+06	4.77855e+06	28.1409	73.33	7	13	21.4382	42.96	4	7	19.7769	60.74	5	6	135	15.8399	5.10986
	Sequence	# PSMs	# Proteins	# Protein Groups	Protein Group Accessions	Modifications	MH+ [Da]	A5: Area	B5: Area	C5: Area	q-Value	PEP	A2	XCorr A2	B2	XCorr B2	C2	XCorr C2	# Missed Cleavages
	IANLLKPDKEIVQDGDHMIIR	10	1	1	P09455		2418.32	2.78164e+06	7.55615e+06	7.67719e+06	0	1.707e-06	High	3.89743	High	3.94475	High	4.99094	1
	MLVNENFEEYLR	4	1	1	P09455		1556.74	3.81751e+06	5.1163e+06	4.96344e+06	0	3.954e-08	High	3.64009	High	4.42951	High	3.95772	0
	CMTTVSWDGDKLQCVQK	2	1	1	P09455	C1(Carbamidomethyl); C14(Carbamidomethyl)	2055.94	773496	0	1.69504e+06	0	0.00013	High	3.37207			High	2.06086	1
	IANLLKPDKEIVQDGDHMIIR	1	1	1	P09455	M18(Oxidation)	2434.31	314584	0	0	0	0.001734	High	2.46863					1
	ALDVNVALR	3	1	1	P09455		970.568	237089	308838	283948	0	0.0001147	High	2.28502	High	3.23419	High	2.96394	0
	GWTQWIEGDELHLEMR	2	1	1	P09455		1999.94	224011	910041	0	0	0.00577	High	1.75226	High	2.68714			0
	NYIMDFQVGKEFEEDLTGIDDRK	3	1	1	P09455		2762.3	763662	0	419970	0.001	0.01525	High	3.30656			High	2.55486	2
	KIANLLKPDKEIVQDGDHMIIR	1	1	1	P09455		2546.42	441771	0	0	0.003	0.04585	High	2.00885					2
P09211	Glutathione S-transferase P OS=Homo sapiens OX=9606 GN=GSTP1 PE=1 SV=2 - [GSTP1_HUMAN]	71.9	1	14	14	110	9.00308e+06	1.9323e+07	1.99607e+07	135.749	71.9	14	39	118.899	70.95	12	37	122.342	70.95	12	34	210	23.341	5.64307
	Sequence	# PSMs	# Proteins	# Protein Groups	Protein Group Accessions	Modifications	MH+ [Da]	A5: Area	B5: Area	C5: Area	q-Value	PEP	A2	XCorr A2	B2	XCorr B2	C2	XCorr C2	# Missed Cleavages
	FQDGDLTLYQSNTILR	13	1	1	P09211		1883.95	4.48393e+06	9.88386e+06	1.04793e+07	0	2.08e-11	High	6.2019	High	6.45657	High	6.34699	0
	TLGLYGKDQQEAALVDMVNDGVEDLR	12	1	1	P09211		2849.4	2.93701e+06	6.78897e+06	6.78252e+06	0	4.277e-11	High	6.19532	High	4.09818	High	4.59437	1
	AFLASPEYVNLPINGNGKQ	17	1	1	P09211		2032.05	5.03288e+06	1.21862e+07	1.21056e+07	0	8.04e-09	High	5.46422	High	5.48709	High	5.43748	1
	MLLADQGQSWKEEVVTVETWQEGSLK	11	1	1	P09211		2991.48	1.41417e+06	2.6769e+06	2.93645e+06	0	1.683e-05	High	4.66674	High	2.61566	High	3.85985	1
	LKAFLASPEYVNLPINGNGKQ	5	1	1	P09211		2273.23	1.69867e+06	6.92954e+06	7.18031e+06	0	6.429e-09	High	4.27123	High	5.06717	High	4.50195	2
	DQQEAALVDMVNDGVEDLR	7	1	1	P09211		2116.98	847719	709609	826725	0	2.695e-08	High	4.10479	High	1.56376	High	3.68915	0
	AFLASPEYVNLPINGNGK	6	1	1	P09211		1904	437275	880647	993322	0	2.343e-06	High	4.06769	High	4.23924	High	4.27062	0
	MLLADQGQSWK	5	1	1	P09211		1276.64	510616	992780	999264	0	1.191e-05	High	3.58393	High	3.79076	High	4.63878	0
	ALPGQLKPFETLLSQNQGGK	17	1	1	P09211		2126.16	1.74924e+07	3.58989e+07	3.72972e+07	0	5.889e-05	High	3.53044	High	4.06822	High	3.71029	0
	ASCLYGQLPK	7	1	1	P09211	C3(Carbamidomethyl)	1136.58	2.39423e+06	6.01544e+06	6.59619e+06	0	0.0004158	High	3.45315	High	3.61548	High	3.59685	0
	YISLIYTNYEAGKDDYVK	5	1	1	P09211		2155.06	2.04263e+06	4.81902e+06	5.13422e+06	0	0.0001042	High	3.3621	High	3.36433	High	2.98386	1
	MPPYTVVYFPVR	3	1	1	P09211		1468.77	187762	782010	684757	0	0.0004175	High	2.90064	High	2.83203	High	3.595	0
	TLGLYGKDQQEAALVDMVNDGVEDLRCK	1	1	1	P09211	C27(Carbamidomethyl)	3137.53	1.02051e+06	0	0	0	3.8e-06	High	1.84238					2
	DQQEAALVDMVNDGVEDLRCK	1	1	1	P09211	C20(Carbamidomethyl)	2405.11	246280	0	0	0.005	0.06617	High	1.83633					1
P22626	Heterogeneous nuclear ribonucleoproteins A2/B1 OS=Homo sapiens OX=9606 GN=HNRNPA2B1 PE=1 SV=2 - [ROA2_HUMAN]	71.67	1	20	22	164	5.41098e+06	1.49854e+07	1.58388e+07	131.67	60.62	17	53	151.132	58.92	18	54	154.856	56.37	18	57	353	37.4067	8.95361
	Sequence	# PSMs	# Proteins	# Protein Groups	Protein Group Accessions	Modifications	MH+ [Da]	A5: Area	B5: Area	C5: Area	q-Value	PEP	A2	XCorr A2	B2	XCorr B2	C2	XCorr C2	# Missed Cleavages
	NMGGPYGGGNYGPGGSGGSGGYGGR	9	1	1	P22626		2189.91	830253	2.63385e+06	3.07934e+06	0	7.154e-12	High	6.34491	High	6.23216	High	6.12381	0
	LFIGGLSFETTEESLR	7	1	1	P22626		1798.93	1.87775e+06	3.2397e+06	3.11698e+06	0	4.252e-09	High	5.37442	High	5.17567	High	5.44022	0
	GFGFVTFDDHDPVDKIVLQK	17	1	1	P22626		2277.16	8.61711e+06	2.41987e+07	2.56879e+07	0	4.024e-06	High	4.37958	High	4.07089	High	3.53677	1
	LFVGGIKEDTEEHHLR	7	2	2	P22626;P09651		1879.97	801285	2.41507e+06	5.63858e+06	0	3.843e-10	High	4.14477	High	1.93391	High	2.26912	1
	GFGFVTFDDHDPVDK	8	1	1	P22626		1695.77	1.65614e+06	4.95239e+06	5.00848e+06	0	1.191e-06	High	3.99062	High	4.29867	High	3.73864	0
	ALSRQEMQEVQSSR	5	1	1	P22626		1648.81	267942	1.26319e+06	1.26392e+06	0	3.583e-06	High	3.70268	High	3.94398	High	3.28267	1
	GGGGNFGPGPGSNFR	9	1	1	P22626		1377.63	3.12675e+06	8.01374e+06	9.52523e+06	0	9.969e-05	High	3.66608	High	3.9047	High	4.2051	0
	KLFVGGIKEDTEEHHLR	7	2	2	P22626;P09651		2008.06	905877	3.59857e+06	3.67421e+06	0	9.684e-07	High	3.63152	High	2.60845	High	2.98989	2
	LTDCVVMRDPASKR	4	1	1	P22626	C4(Carbamidomethyl)	1647.83	859137	1.74075e+06	1.70738e+06	0	3.646e-06	High	3.62887	High	3.00927	High	3.01007	2
	RGFGFVTFDDHDPVDKIVLQK	4	1	1	P22626		2433.26	773645	837072	1.63799e+06	0	0.0003272	High	3.62282	High	3.99913	High	2.31403	2
	GFGDGYNGYGGGPGGGNFGGSPGYGGGR	1	1	1	P22626		2495.05	112941	0	0	0	2.77e-05	High	3.52751					0
	GFGFVTFSSMAEVDAAMAARPHSIDGR	21	1	1	P22626		2827.33	4.48906e+06	1.27439e+07	1.23032e+07	0	1.423e-05	High	3.5171	High	2.61854	High	2.92664	0
	IDTIEIITDR	3	1	1	P22626		1188.65	806550	2.08475e+06	2.3893e+06	0	1.886e-05	High	3.34234	High	3.89467	High	4.0751	0
	GGNFGFGDSR	15	1	1	P22626		1013.44	402865	1.69768e+06	1.19038e+06	0	0.0001848	High	2.80801	High	3.50184	High	3.62721	0
	TLETVPLER	5	1	1	P22626		1057.59	970086	2.3827e+06	2.86694e+06	0	0.005783	High	2.34876	High	2.83097	High	2.54609	0
	QEMQEVQSSR	31	1	1	P22626		1221.55	203414	0	3.17813e+06	0	3.227e-05	High	2.05441	High	3.23854	High	3.35005	0
	RAVAREESGKPGAHVTVK	2	1	1	P22626		1892.05	0	250699	0	0	1.067e-06			High	3.51775			2
	AVAREESGKPGAHVTVK	1	1	1	P22626		1735.94	0	2.8026e+06	0	0	0.004391			High	3.05699			1
	YHTINGHNAEVRK	2	1	1	P22626		1538.78	0	0	4.44201e+06	0	0.0007419					High	3.14472	1
	DYFEEYGKIDTIEIITDR	1	1	1	P22626		2220.07	0	0	1.15811e+06	0	0.002178					High	2.50064	1
	GFGFVTFSSMAEVDAAMAARPHSIDGR	2	1	1	P22626	M10(Oxidation)	2843.33	539806	0	2.06592e+06	0.001	0.006723	High	2.15238			High	1.49888	0
	YHTINGHNAEVR	2	1	1	P22626		1410.69	0	348833	4.67265e+06	0.002	0.02586			High	1.98767	High	2.54626	0
	LFIGGLSFETTEESLRNYYEQWGK	1	1	1	P22626		2867.39	333920	0	0	0.009	0.1085	High	1.64109					1
P60709	Actin, cytoplasmic 1 OS=Homo sapiens OX=9606 GN=ACTB PE=1 SV=1 - [ACTB_HUMAN]	71.47	2	13	27	536	3.96805e+07	8.60904e+07	8.78426e+07	463.31	71.47	26	171	550.864	71.47	26	191	520.718	71.47	26	174	375	41.7097	5.47803
	Sequence	# PSMs	# Proteins	# Protein Groups	Protein Group Accessions	Modifications	MH+ [Da]	A5: Area	B5: Area	C5: Area	q-Value	PEP	A2	XCorr A2	B2	XCorr B2	C2	XCorr C2	# Missed Cleavages
	FRCPEALFQPSFLGMESCGIHETTFNSIMK	13	2	1	P60709	C3(Carbamidomethyl); C18(Carbamidomethyl)	3534.63	8.83614e+06	1.62868e+07	1.61022e+07	0	3.957e-09	High	7.06096	High	2.75012	High	2.89689	1
	TTGIVMDSGDGVTHTVPIYEGYALPHAILR	28	2	1	P60709		3183.62	4.63476e+07	8.15932e+07	8.26356e+07	0	5.358e-13	High	6.95167	High	4.3675	High	3.7456	0
	KDLYANTVLSGGTTMYPGIADR	4	2	1	P60709		2343.17	2.93612e+06	6.13125e+06	6.24159e+06	0	2.062e-09	High	6.26851	High	3.73511	High	3.80976	1
	LCYVALDFEQEMATAASSSSLEK	37	2	1	P60709	C2(Carbamidomethyl)	2550.18	1.38375e+06	1.99083e+07	1.80424e+07	0	2.853e-09	High	5.70904	High	5.54732	High	5.57322	0
	DLYANTVLSGGTTMYPGIADR	20	2	1	P60709		2215.07	6.55521e+06	1.55091e+07	1.45575e+07	0	7.948e-08	High	5.18473	High	4.83818	High	4.94303	0
	TTGIVMDSGDGVTHTVPIYEGYALPHAILR	7	2	1	P60709	M6(Oxidation)	3199.61	3.21953e+06	9.67836e+06	1.02519e+07	0	4.88e-09	High	5.1631	High	3.05863	High	2.87692	0
	MQKEITALAPSTMK	8	4	2	P60709;P68032		1548.81	2.03734e+06	1.78792e+07	1.83316e+07	0	1.515e-08	High	5.03441	High	4.58987	High	4.44077	1
	CPEALFQPSFLGMESCGIHETTFNSIMK	11	2	1	P60709	C1(Carbamidomethyl); C16(Carbamidomethyl)	3231.46	5.12118e+06	7.95787e+06	7.9837e+06	0	5.151e-09	High	5.01822	High	4.27542	High	4.05086	0
	CDVDIRKDLYANTVLSGGTTMYPGIADR	4	2	1	P60709	C1(Carbamidomethyl)	3101.51	2.00662e+06	529020	543572	0	1.024e-05	High	4.80222	High	1.92551	High	3.52443	2
	VAPEEHPVLLTEAPLNPK	24	2	1	P60709		1954.07	5.10467e+07	1.30268e+08	1.32524e+08	0	2.092e-08	High	4.78438	High	4.65099	High	4.62953	0
	SYELPDGQVITIGNER	31	4	2	P60709;P68032		1790.9	2.16473e+07	4.64095e+07	4.83686e+07	0	5.691e-08	High	4.69196	High	4.78444	High	4.99333	0
	DLYANTVLSGGTTMYPGIADR	11	2	1	P60709	M14(Oxidation)	2231.07	944437	3.30792e+06	3.0867e+06	0	3.928e-06	High	4.63214	High	4.30226	High	4.23221	0
	IWHHTFYNELR	10	4	2	P60709;P68032		1515.75	2.40499e+06	5.65851e+06	6.26597e+06	0	1.679e-06	High	4.31503	High	4.32366	High	4.21151	0
	GYSFTTTAER	21	2	1	P60709		1132.53	4.93455e+06	1.54635e+07	2.27185e+07	0	0.0001214	High	3.79046	High	3.79178	High	3.93838	0
	HQGVMVGMGQKDSYVGDEAQSKR	4	4	2	P60709;P68032		2507.18	444092	3.1589e+06	3.12252e+06	0	4.943e-08	High	3.62087	High	4.38098	High	4.40534	2
	HQGVMVGMGQKDSYVGDEAQSKR	6	4	2	P60709;P68032	M8(Oxidation)	2523.18	200790	1.35475e+06	1.52861e+06	0	2.738e-05	High	3.61709	High	3.96865	High	2.88184	2
	EKLCYVALDFEQEMATAASSSSLEK	7	2	1	P60709	C4(Carbamidomethyl)	2807.32	567034	2.01239e+06	2.07569e+06	0	9.191e-05	High	3.59464	High	3.17862	High	2.97057	1
	AGFAGDDAPR	30	4	2	P60709;P68032		976.45	3.29732e+06	2.39613e+06	5.01612e+06	0	0.0001033	High	3.55318	High	3.82133	High	3.80645	0
	QEYDESGPSIVHR	7	2	1	P60709		1516.7	2.26753e+06	1.17919e+07	1.26292e+07	0	4.175e-06	High	3.45672	High	3.86032	High	3.80991	0
	AVFPSIVGRPR	10	4	2	P60709;P68032		1198.71	1.97863e+07	1.63957e+07	1.80158e+07	0	0.001127	High	3.37507	High	3.62273	High	3.38089	0
	MQKEITALAPSTMK	8	4	2	P60709;P68032	M13(Oxidation)	1564.81	247209	1.06094e+06	1.05129e+06	0	2.422e-05	High	3.32493	High	3.58277	High	3.75971	1
	HQGVMVGMGQK	45	4	2	P60709;P68032		1171.57	2.23401e+06	239696	0	0	0.0002685	High	3.31864	High	3.97574	High	3.7668	0
	EITALAPSTMK	13	4	2	P60709;P68032		1161.62	1.41261e+07	4.31281e+07	4.73705e+07	0	0.0002414	High	3.16694	High	3.18766	High	3.06267	0
	LDLAGRDLTDYLMK	14	4	2	P60709;P68032		1623.84	5.37088e+06	1.15131e+07	1.20803e+07	0	3.428e-05	High	3.13961	High	3.52663	High	3.15015	1
	GYSFTTTAEREIVR	4	2	1	P60709		1629.82	1.32154e+06	807723	812369	0	0.0007629	High	2.97119	High	3.00629	High	3.04642	1
	CPEALFQPSFLGMESCGIHETTFNSIMK	2	2	1	P60709	C1(Carbamidomethyl); M13(Oxidation); C16(Carbamidomethyl)	3247.46	294700	0	793733	0	0.0002294	High	2.96892			High	1.64179	0
	EITALAPSTMK	13	4	2	P60709;P68032	M10(Oxidation)	1177.61	815765	3.12372e+06	3.41969e+06	0	0.0003991	High	2.89872	High	3.58227	High	3.49554	0
	LDLAGRDLTDYLMK	3	4	2	P60709;P68032	M13(Oxidation)	1639.84	218903	727213	779342	0	0.0003242	High	2.70726	High	1.96349	High	2.31134	1
	DSYVGDEAQSKR	55	4	2	P60709;P68032		1354.62	1.02134e+06	5.7109e+06	6.66267e+06	0	4.188e-06	High	2.61414	High	3.76691	High	4.09715	1
	DSYVGDEAQSK	31	4	2	P60709;P68032		1198.52	185860	261039	552389	0	4.563e-05	High	2.43608	High	3.76661	High	3.76205	0
	FRCPEALFQPSFLGMESCGIHETTFNSIMK	5	2	1	P60709	C3(Carbamidomethyl); M15(Oxidation); C18(Carbamidomethyl)	3550.63	566368	0	194734	0	0.001385	High	2.43062	High	1.8237	High	2.33436	1
	IKIIAPPERK	7	4	2	P60709;P68032		1164.75	1.38091e+06	2.26539e+06	3.97867e+06	0	9.36e-05	High	2.37929	High	3.34284	High	3.1803	2
	QEYDESGPSIVHRK	5	2	1	P60709		1644.8	612454	3.0662e+06	3.57949e+06	0	0.001786	High	1.68238	High	2.73755	High	2.7594	1
	KDLYANTVLSGGTTMYPGIADR	2	2	1	P60709	M15(Oxidation)	2359.16	0	749934	407585	0	0.001157			High	3.80904	High	3.78888	1
	HQGVMVGMGQK	30	4	2	P60709;P68032	M5(Oxidation)	1187.57	0	438057	1.0005e+06	0	3.569e-05			High	3.6619	High	2.99417	0
	LCYVALDFEQEMATAASSSSLEK	3	2	1	P60709	C2(Carbamidomethyl); M12(Oxidation)	2566.17	0	1.43771e+06	1.29097e+06	0	3.45e-06			High	2.77175	High	3.42863	0
	HQGVMVGMGQKDSYVGDEAQSK	2	4	2	P60709;P68032		2351.08	0	708342	833651	0	0.001626			High	2.2892	High	2.37311	1
	IKIIAPPER	1	4	2	P60709;P68032		1036.65	597286	0	0	0.004	0.05467	High	2.53615					1
P60660	Myosin light polypeptide 6 OS=Homo sapiens OX=9606 GN=MYL6 PE=1 SV=2 - [MYL6_HUMAN]	70.86	1	7	7	84	5.86588e+06	1.32114e+07	1.37602e+07	82.5368	52.98	6	28	95.6786	70.86	7	29	86.6961	70.86	7	27	151	16.9191	4.65283
	Sequence	# PSMs	# Proteins	# Protein Groups	Protein Group Accessions	Modifications	MH+ [Da]	A5: Area	B5: Area	C5: Area	q-Value	PEP	A2	XCorr A2	B2	XCorr B2	C2	XCorr C2	# Missed Cleavages
	NKDQGTYEDYVEGLR	9	1	1	P60660		1786.83	2.04702e+06	9.03278e+06	9.61178e+06	0	1.085e-07	High	4.84897	High	4.52354	High	4.68758	1
	VFDKEGNGTVMGAEIR	10	1	1	P60660		1722.85	2.19265e+06	9.03553e+06	9.09079e+06	0	7.048e-09	High	4.65824	High	4.76369	High	5.25363	1
	VLDFEHFLPMLQTVAK	28	1	1	P60660		1888	6.23667e+06	1.2087e+07	1.18201e+07	0	2.373e-06	High	4.25929	High	3.39502	High	3.6156	0
	ALGQNPTNAEVLK	9	1	1	P60660		1354.73	8.30779e+06	1.85117e+07	1.98488e+07	0	0.0001848	High	3.95284	High	4.31463	High	3.96214	0
	ILYSQCGDVMR	7	1	1	P60660	C6(Carbamidomethyl)	1341.63	3.05319e+06	8.06323e+06	8.658e+06	0	9.273e-07	High	3.66343	High	4.25691	High	4.17418	0
	VLDFEHFLPMLQTVAK	4	1	1	P60660	M10(Oxidation)	1904	459169	1.49988e+06	1.60354e+06	0	4.754e-05	High	2.72201	High	2.55663	High	2.89358	0
	HVLVTLGEK	13	1	1	P60660		995.589	2.15523e+06	2.49951e+06	3.83409e+06	0	0.0007812	High	2.70724	High	3.13208	High	3.16535	0
	VFDKEGNGTVMGAEIR	2	1	1	P60660	M11(Oxidation)	1738.85	0	928661	1.08856e+06	0	7.825e-06			High	3.6277	High	3.49194	1
	MTEEEVEMLVAGHEDSNGCINYEAFVR	2	1	1	P60660	C19(Carbamidomethyl)	3129.36	0	430647	416589	0	0.0005496			High	2.65291	High	3.68916	0
P04406	Glyceraldehyde-3-phosphate dehydrogenase OS=Homo sapiens OX=9606 GN=GAPDH PE=1 SV=3 - [G3P_HUMAN]	70.75	1	23	23	198	1.58581e+07	3.30248e+07	3.33472e+07	195.725	59.4	22	71	191.999	66.87	20	65	186.942	68.66	19	62	335	36.0304	8.45557
	Sequence	# PSMs	# Proteins	# Protein Groups	Protein Group Accessions	Modifications	MH+ [Da]	A5: Area	B5: Area	C5: Area	q-Value	PEP	A2	XCorr A2	B2	XCorr B2	C2	XCorr C2	# Missed Cleavages
	VIHDNFGIVEGLMTTVHAITATQK	40	1	1	P04406		2595.36	8.08248e+06	3.02432e+07	2.98502e+07	0	8.197e-13	High	6.27938	High	5.90117	High	5.33645	0
	LISWYDNEFGYSNR	15	1	1	P04406		1763.81	5.79958e+06	1.25728e+07	1.36889e+07	0	3.984e-08	High	5.03988	High	4.76305	High	4.98645	0
	WGDAGAEYVVESTGVFTTMEK	16	1	1	P04406		2277.04	1.43785e+06	6.49233e+06	6.07397e+06	0	8.42e-07	High	4.87739	High	4.66233	High	4.81565	0
	RVIISAPSADAPMFVMGVNHEK	3	1	1	P04406		2369.22	609631	875942	886324	0	3.853e-07	High	4.63726	High	4.26729	High	4.18872	1
	VVDLMAHMASKE	12	1	1	P04406		1330.65	9.12642e+06	1.81047e+07	1.93841e+07	0	1.9e-06	High	4.50008	High	4.75347	High	4.95292	1
	IISNASCTTNCLAPLAK	15	1	1	P04406	C7(Carbamidomethyl); C11(Carbamidomethyl)	1833.92	6.48239e+06	1.72456e+07	1.8288e+07	0	6.328e-09	High	4.48937	High	4.95969	High	4.99817	0
	GALQNIIPASTGAAK	12	1	1	P04406		1411.79	2.08654e+07	4.12429e+07	4.18414e+07	0	9.374e-08	High	4.20183	High	3.87566	High	3.76924	0
	LVINGNPITIFQERDPSK	7	1	1	P04406		2041.11	1.17575e+07	1.77917e+07	1.84786e+07	0	1.856e-05	High	4.14051	High	4.08836	High	3.38548	1
	IKWGDAGAEYVVESTGVFTTMEK	3	1	1	P04406		2518.22	1.12866e+06	3.48792e+06	3.40717e+06	0	2.546e-07	High	4.04936	High	3.27735	High	2.91495	1
	LVINGNPITIFQER	10	1	1	P04406		1613.9	1.76951e+06	4.22601e+06	4.36587e+06	0	1.464e-07	High	3.98834	High	4.07269	High	4.80822	0
	AENGKLVINGNPITIFQER	4	1	1	P04406		2113.14	251224	899992	836713	0	1.878e-05	High	3.98656	High	2.89113	High	2.60442	1
	VPTANVSVVDLTCR	12	1	1	P04406	C13(Carbamidomethyl)	1530.8	4.84804e+06	1.13974e+07	1.1621e+07	0	6.005e-05	High	3.94952	High	4.33428	High	4.53108	0
	LTGMAFRVPTANVSVVDLTCR	2	1	1	P04406	C20(Carbamidomethyl)	2307.19	0	0	0	0	6.127e-07	High	3.86926					1
	VVDLMAHMASK	4	1	1	P04406		1201.61	231182	255488	1.60603e+06	0	0.001274	High	3.2166	High	2.69032	High	3.42367	0
	AENGKLVINGNPITIFQERDPSK	6	1	1	P04406		2540.36	1.95148e+06	6.91163e+06	7.42312e+06	0	0.0004705	High	2.93366	High	2.85798	High	3.30714	2
	VIISAPSADAPMFVMGVNHEK	8	1	1	P04406		2213.12	5.50734e+06	8.05089e+06	7.78766e+06	0	4.389e-05	High	2.82983	High	2.63479	High	1.30045	0
	VPTANVSVVDLTCRLEKPAK	2	1	1	P04406	C13(Carbamidomethyl)	2197.2	649385	0	0	0	0.0003405	High	2.59556	High	2.84076			1
	LEKPAKYDDIKK	2	1	1	P04406		1447.82	756517	0	2474428	0	0.001434	High	2.47207			High	2.49163	2
	VIHDNFGIVEGLMTTVHAITATQK	4	1	1	P04406	M13(Oxidation)	2611.36	351110	0	606244	0	0.0002434	High	2.39543			High	2.31961	0
	VIISAPSADAPMFVMGVNHEKYDNSLK	5	1	1	P04406		2933.46	1.49514e+07	2.75882e+07	2.83501e+07	0	0.0007187	High	2.39201	High	2.28498	High	1.97758	1
	VIISAPSADAPMFVMGVNHEK	2	1	1	P04406	M12(Oxidation)	2229.11	488443	1.17038e+06	0	0	0.003463	High	2.12746	High	1.93151			0
	LVINGNPITIFQERDPSKIK	1	1	1	P04406		2282.29	1.83576e+06	0	0	0	0.0001688	High	2.1107					2
	VIISAPSADAPMFVMGVNHEKYDNSLK	2	1	1	P04406	M15(Oxidation)	2949.45	824543	2.7195e+06	0	0	0.0009365	High	2.06555	High	2.47235			1
	RVIISAPSADAPMFVMGVNHEKYDNSLK	2	1	1	P04406		3089.56	924461	2.86128e+06	0	0	0.0001678	High	1.68529	High	2.34289			2
	GILGYTEHQVVSSDFNSDTHSSTFDAGAGIALNDHFVK	3	1	1	P04406		4036.9	0	1.65517e+06	1.5056e+06	0	0.001651			High	3.19881	High	3.39563	0
	WGDAGAEYVVESTGVFTTMEK	2	1	1	P04406	M19(Oxidation)	2293.04	0	613038	513869	0	0.0001156			High	2.00429	High	2.87543	0
	VKVGVNGFGR	3	1	1	P04406		1032.6	614202	1.25275e+06	1.60539e+06	0.001	0.006506	High	3.01857	High	3.0339	High	3.09468	1
	VVDLMAHMASKE	1	1	1	P04406	M8(Oxidation)	1346.64	319106	0	0	0.003	0.04389	High	1.90286					1
P02545	Prelamin-A/C OS=Homo sapiens OX=9606 GN=LMNA PE=1 SV=1 - [LMNA_HUMAN]	69.88	1	44	45	275	1.23675e+07	3.8102e+07	3.8347e+07	288.385	60.24	36	94	336.011	58.89	38	94	316.876	59.34	33	87	664	74.0947	7.02002
	Sequence	# PSMs	# Proteins	# Protein Groups	Protein Group Accessions	Modifications	MH+ [Da]	A5: Area	B5: Area	C5: Area	q-Value	PEP	A2	XCorr A2	B2	XCorr B2	C2	XCorr C2	# Missed Cleavages
	MQQQLDEYQELLDIK	15	1	1	P02545		1893.93	6.14118e+06	1.28912e+07	1.35767e+07	0	3.794e-09	High	5.627	High	5.90797	High	5.51692	0
	IRIDSLSAQLSQLQK	12	1	1	P02545		1699.98	9.86312e+06	2.42072e+07	2.38472e+07	0	7.861e-07	High	5.56971	High	4.95927	High	5.68579	1
	AGQVVTIWAAGAGATHSPPTDLVWK	16	1	1	P02545		2533.32	5952614	1.75853e+07	1.8132e+07	0	6.34e-08	High	5.07762	High	4.58568	High	3.48869	0
	LQEKEDLQELNDR	8	1	1	P02545		1629.81	2.14912e+06	9.27348e+06	9.86243e+06	0	1.82e-08	High	4.94686	High	4.35987	High	5.06608	1
	NSNLVGAAHEELQQSR	15	1	1	P02545		1752.87	1.08854e+07	3.95902e+07	4.12606e+07	0	1.564e-09	High	4.933	High	5.53392	High	5.34967	0
	TALINSTGEEVAMR	14	1	1	P02545		1491.75	7.19392e+06	1.58881e+07	1.70487e+07	0	3.944e-07	High	4.65173	High	5.11289	High	5.15988	0
	VAVEEVDEEGKFVR	13	1	1	P02545		1605.82	1.17576e+07	4.30302e+07	4.07341e+07	0	1.009e-07	High	4.63543	High	4.76398	High	5.04937	1
	SGAQASSTPLSPTR	20	1	1	P02545		1359.69	4.33084e+06	4.68029e+06	1.0986e+07	0	3.008e-08	High	4.60271	High	4.92032	High	4.63247	0
	LADALQELR	10	1	1	P02545		1028.58	1.44594e+07	3.16856e+07	3.30463e+07	0	5.638e-05	High	4.00947	High	3.97207	High	4.04388	0
	AQNTWGCGNSLR	16	1	1	P02545	C7(Carbamidomethyl)	1363.62	1.31688e+06	4.71645e+06	5.71105e+06	0	2.155e-06	High	3.87058	High	4.26322	High	4.6047	0
	IDSLSAQLSQLQK	7	1	1	P02545		1430.79	2.03915e+06	5.51083e+06	6.1124e+06	0	2.966e-05	High	3.869	High	4.77595	High	4.40973	0
	LRDLEDSLAR	14	1	1	P02545		1187.64	5.17053e+06	9.10622e+06	1.02922e+07	0	4.539e-05	High	3.83998	High	3.75385	High	3.66233	1
	LQEKEDLQELNDRLAVYIDR	2	1	1	P02545		2460.28	321118	0	557314	0	0.001548	High	3.71819			High	2.2406	2
	LKDLEALLNSK	4	1	1	P02545		1243.73	1.90262e+06	3.19727e+06	3.22362e+06	0	1.118e-06	High	3.66861	High	2.79036	High	3.27924	1
	SVGGSGGGSFGDNLVTR	4	1	1	P02545		1566.75	765766	1.98633e+06	1.98294e+06	0	2.121e-09	High	3.58784	High	4.96212	High	5.13357	0
	TALINSTGEEVAMR	3	1	1	P02545	M13(Oxidation)	1507.75	154453	774844	809040	0	2.167e-05	High	3.57702	High	4.54231	High	4.02135	0
	LQTMKEELDFQK	6	1	1	P02545		1509.77	1.327e+06	4.08055e+06	4.22481e+06	0	7.642e-06	High	3.47289	High	4.41976	High	4.59377	1
	AAYEAELGDARK	7	1	1	P02545		1293.64	1.05262e+06	3.54442e+06	4.63693e+06	0	0.0003419	High	3.45433	High	3.4155	High	3.33873	1
	EGDLIAAQAR	1	1	1	P02545		1043.55	346369	0	0	0	5.325e-05	High	3.39436					0
	TALINSTGEEVAMRK	5	1	1	P02545		1619.85	1.60621e+06	417293	7.114e+06	0	1.771e-06	High	3.3906	High	3.73884	High	4.04722	1
	TLEGELHDLR	1	1	1	P02545		1182.61	516019	0	0	0	0.0003524	High	3.28428					0
	ASASGSGAQVGGPISSGSSASSVTVTR	3	1	1	P02545		2365.17	213236	1.07815e+06	1.10329e+06	0	0.0001358	High	3.16284	High	3.17387	High	3.32618	0
	NIYSEELRETK	3	1	1	P02545		1381.7	377071	368701	490261	0	0.0008883	High	3.14795	High	2.82798	High	3.41903	1
	SLETENAGLR	6	1	1	P02545		1089.55	1.13625e+06	1.6377e+06	3.04293e+06	0	7.492e-05	High	3.085	High	3.67003	High	3.55652	0
	SNEDQSMGNWQIKR	6	1	1	P02545		1692.78	1.29318e+06	6.38429e+06	7.25092e+06	0	0.003366	High	3.08165	High	3.31085	High	3.7266	1
	LQTMKEELDFQKNIYSEELR	3	1	1	P02545		2514.26	550606	1.50987e+06	0	0	0.0001008	High	3.00115	High	2.4821			2
	TLEGELHDLRGQVAK	3	1	1	P02545		1665.9	1.1636e+06	0	0	0	0.003801	High	2.82657					1
	AQHEDQVEQYKKELEK	3	1	1	P02545		2001.99	184619	251801	2.08777e+06	0	2.835e-05	High	2.79262	High	2.3892	High	3.59937	2
	NKSNEDQSMGNWQIKR	6	1	1	P02545		1934.92	824119	3.21271e+06	4.44272e+06	0	3.512e-05	High	2.74446	High	3.48754	High	4.37375	2
	LRITESEEVVSR	4	1	1	P02545		1417.77	158508	1.01413e+06	268033	0	2.294e-06	High	2.52122	High	3.82546	High	4.14158	1
	TALINSTGEEVAMRK	1	1	1	P02545	M13(Oxidation)	1635.84	186042	0	0	0	0.0006943	High	2.44857					1
	EAALSTALSEKR	5	1	1	P02545		1275.69	775310	975554	1.05277e+06	0	0.0002107	High	2.35433	High	3.45046	High	3.87585	1
	TVLCGTCGQPADKASASGSGAQVGGPISSGSSASSVTVTR	4	1	1	P02545	C4(Carbamidomethyl); C7(Carbamidomethyl)	3752.79	156458	1.94244e+06	1.85445e+06	0	4.824e-05	High	2.15105	High	4.26467	High	3.08503	1
	TVLCGTCGQPADK	9	1	1	P02545	C4(Carbamidomethyl); C7(Carbamidomethyl)	1406.64	64600.4	303441	519029	0	0.0009347	High	2.08932	High	3.27267	High	3.40373	0
	QNGDDPLLTYRFPPK	3	1	1	P02545		1760.9	398685	0	0	0	0.002507	High	2.01	High	3.16316			1
	LALDMEIHAYR	2	1	1	P02545		1331.68	732392	0	0	0	0.00438	High	1.85603					0
	AAYEAELGDAR	3	1	1	P02545		1165.55	0	2.54129e+06	3196334	0	9.479e-07			High	4.42177	High	4.42817	0
	SNEDQSMGNWQIK	3	1	1	P02545		1536.68	0	1.06157e+06	1.13046e+06	0	1.019e-06			High	3.92366	High	4.3409	0
	QNGDDPLLTYR	3	1	1	P02545		1291.63	0	2.17241e+06	2.81647e+06	0	7.114e-05			High	3.19296	High	3.25975	0
	LALDMEIHAYRK	2	1	1	P02545		1459.77	0	880095	883080	0	0.000917			High	2.39125	High	2.64731	1
	NTKKEGDLIAAQAR	2	1	1	P02545		1514.83	288915	0	0	0.001	0.007499	High	2.07768					2
	KLLEGEEER	1	3	3	P02545;P20700;Q03252		1102.57	0	109060	0	0.001	0.01233			High	2.91836			1
	LEAALGEAKKQLQDEMLR	1	1	1	P02545		2043.09	0	304183	0	0.001	0.007948			High	2.82824			2
	AQHEDQVEQYKK	2	1	1	P02545		1502.72	0	0	0	0.001	0.01099			High	2.7241			1
	KLLEGEEERLR	2	1	1	P02545		1371.76	178366	817702	0	0.002	0.02981	High	2.30503	High	2.55519			2
	SVTVVEDDEDEDGDDLLHHHHGSHCSSSGDPAEYNLR	1	1	1	P02545	C25(Carbamidomethyl)	4130.73	0	0	672737	0.008	0.09221					High	2.01762	0
	LSPSPTSQR	1	1	1	P02545		972.511	0	2.31531e+06	0	0.009	0.1044			High	1.77729			0
P41208	Centrin-2 OS=Homo sapiens OX=9606 GN=CETN2 PE=1 SV=1 - [CETN2_HUMAN]	69.19	1	9	9	67	1.94473e+06	4.95551e+06	5.25697e+06	54.5014	62.21	8	22	76.9639	69.19	8	24	52.5316	69.19	9	21	172	19.7259	4.99561
	Sequence	# PSMs	# Proteins	# Protein Groups	Protein Group Accessions	Modifications	MH+ [Da]	A5: Area	B5: Area	C5: Area	q-Value	PEP	A2	XCorr A2	B2	XCorr B2	C2	XCorr C2	# Missed Cleavages
	MISEIDKEGTGKMNFGDFLTVMTQK	3	1	1	P41208		2820.37	1.50459e+06	0	354082	0	3e-07	High	5.06106			High	2.10097	2
	EAFDLFDADGTGTIDVK	8	1	1	P41208		1813.85	679341	3.42659e+06	3.28112e+06	0	6.178e-08	High	4.50542	High	5.07122	High	4.8276	0
	MNFGDFLTVMTQK	13	1	1	P41208		1531.73	2.10777e+06	3.85383e+06	3.7732e+06	0	1.638e-07	High	4.49726	High	4.57125	High	4.75708	0
	LFDDDETGKISFK	7	1	1	P41208		1514.74	2.22183e+06	6.55739e+06	7.05422e+06	0	7.906e-08	High	3.97626	High	4.58062	High	5.01488	1
	ELGENLTDEELQEMIDEADRDGDGEVSEQEFLR	7	1	1	P41208		3810.68	709616	1.80626e+06	1.8359e+06	0	1.302e-05	High	3.50725	High	3.46343	High	2.6708	1
	MSPKPELTEEQKQEIR	6	1	1	P41208		1942.99	989304	4.45532e+06	4.58947e+06	0	3.306e-06	High	2.67859	High	3.59366	High	2.64341	1
	AFKLFDDDETGKISFK	3	1	1	P41208		1860.94	248083	321134	603480	0	0.00112	High	2.32921	High	2.59421	High	2.27152	2
	MSPKPELTEEQKQEIR	3	1	1	P41208	M1(Oxidation)	1958.99	146188	467515	540283	0	0.002735	High	2.07702	High	2.82974	High	2.24215	1
	MISEIDKEGTGK	8	1	1	P41208		1307.65	1.16302e+06	220232	268800	0	3.793e-06	High	2.06583	High	3.61407	High	3.35336	1
	MSEKDTKEEILK	9	1	1	P41208		1450.75	0	2.97264e+06	4.12721e+06	0	0.0003674			High	2.69898	High	3.04539	2
P08758	Annexin A5 OS=Homo sapiens OX=9606 GN=ANXA5 PE=1 SV=2 - [ANXA5_HUMAN]	69.06	1	19	19	96	3.21253e+06	7.80363e+06	7.64815e+06	89.7301	69.06	18	36	77.8839	68.75	17	29	86.1576	57.81	16	31	320	35.9144	5.04639
	Sequence	# PSMs	# Proteins	# Protein Groups	Protein Group Accessions	Modifications	MH+ [Da]	A5: Area	B5: Area	C5: Area	q-Value	PEP	A2	XCorr A2	B2	XCorr B2	C2	XCorr C2	# Missed Cleavages
	MLVVLLQANRDPDAGIDEAQVEQDAQALFQAGELK	4	1	1	P08758		3795.91	597324	715837	0	0	6.585e-06	High	5.76314	High	2.06134			1
	GLGTDEESILTLLTSR	19	1	1	P08758		1704.9	2.38301e+06	5.78387e+06	6.11859e+06	0	1.633e-09	High	5.16946	High	4.49874	High	5.13582	0
	QVYEEEYGSSLEDDVVGDTSGYYQR	5	1	1	P08758		2888.24	575897	1.33727e+06	1.33773e+06	0	4.129e-06	High	4.94462	High	3.70047	High	3.61397	0
	WGTDEEKFITIFGTR	5	1	1	P08758		1799.9	1.27588e+06	2.86941e+06	3.35019e+06	0	1.499e-06	High	4.59934	High	3.56563	High	3.63134	1
	GTVTDFPGFDERADAETLRK	6	1	1	P08758		2225.08	2.11779e+06	8.48222e+06	8.16453e+06	0	1.214e-05	High	3.87129	High	3.14448	High	3.38786	2
	VLTEIIASR	6	1	1	P08758		1001.6	4.60187e+06	9.14481e+06	8.66132e+06	0	5.27e-05	High	3.44014	High	3.24375	High	3.27027	0
	NFATSLYSMIK	6	1	1	P08758		1274.64	2.24969e+06	4.09822e+06	4.24891e+06	0	0.0002534	High	3.38924	High	3.40377	High	3.11409	0
	SEIDLFNIRK	6	1	1	P08758		1234.68	1.31507e+06	814800	2.20528e+06	0	0.002074	High	3.34951	High	3.25329	High	3.45689	1
	SEIDLFNIR	3	1	1	P08758		1106.58	648959	1.50129e+06	1.76986e+06	0	0.0004557	High	2.89648	High	3.51237	High	3.15689	0
	DLLDDLKSELTGKFEK	7	1	1	P08758		1850.98	1.90191e+06	2.91714e+06	3.29086e+06	0	0.002547	High	2.84625	High	2.81939	High	3.02637	2
	KNFATSLYSMIK	1	1	1	P08758		1402.74	0	0	0	0	0.0009982	High	2.7659					1
	SNAQRQEISAAFK	5	1	1	P08758		1449.75	250337	1.01251e+06	1.40014e+06	0	0.0007092	High	2.57975	High	2.9591	High	3.35172	1
	GTVTDFPGFDERADAETLR	3	1	1	P08758		2096.99	514765	1.4796e+06	1.49781e+06	0	0.002864	High	2.51433	High	3.09247	High	2.16857	1
	DLLDDLKSELTGK	2	1	1	P08758		1446.77	138228	0	0	0	0.002894	High	2.33688					1
	ALLLLCGEDD	3	1	1	P08758	C6(Carbamidomethyl)	1118.54	467558	979011	890042	0	0.005369	High	2.17099	High	2.67985	High	2.12806	0
	ETSGNLEQLLLAVVK	4	1	1	P08758		1613.91	168488	457833	489249	0	0.0001762	High	2.04917	High	1.67657	High	2.77791	0
	SIPAYLAETLYYAMK	4	1	1	P08758		1733.88	622966	1.23069e+06	2.01914e+06	0	8.434e-07	High	1.77528	High	1.44737	High	3.66763	0
	LIVALMKPSR	5	1	1	P08758		1127.7	2.65269e+06	4.61926e+06	4.8152e+06	0	0.001309	High	1.59334	High	2.89923	High	2.61363	0
	GTVTDFPGFDER	2	1	1	P08758		1340.61	0	4.2015e+06	4.31991e+06	0	1.234e-05			High	3.78656	High	4.07586	0
P58876	Histone H2B type 1-D OS=Homo sapiens OX=9606 GN=HIST1H2BD PE=1 SV=2 - [H2B1D_HUMAN]	69.05	6	3	11	898	1.24939e+08	2.32508e+08	2.42856e+08	899.526	69.05	10	400	603.707	58.73	9	255	578.967	69.05	10	243	126	13.9276	10.3159
	Sequence	# PSMs	# Proteins	# Protein Groups	Protein Group Accessions	Modifications	MH+ [Da]	A5: Area	B5: Area	C5: Area	q-Value	PEP	A2	XCorr A2	B2	XCorr B2	C2	XCorr C2	# Missed Cleavages
	AMGIMNSFVNDIFER	340	9	2	P23527;P58876		1743.82	1.09899e+08	2.67818e+08	2.81596e+08	0	1.528e-11	High	6.49801	High	5.8702	High	5.65831	0
	AMGIMNSFVNDIFER	143	9	2	P23527;P58876	M2(Oxidation)	1759.82	1.66764e+07	4.36591e+07	4.54822e+07	0	3.001e-09	High	5.58602	High	5.73937	High	6.08699	0
	AMGIMNSFVNDIFER	17	9	2	P23527;P58876	M2(Oxidation); M5(Oxidation)	1775.81	6.94509e+06	1.75548e+07	1.74621e+07	0	2.259e-08	High	5.44243	High	5.04557	High	4.97112	0
	VLKQVHPDTGISSK	70	9	2	P23527;P58876		1508.85	2.25244e+07	4.78226e+07	4.93003e+07	0	4.593e-07	High	4.58673	High	4.60813	High	5.15838	1
	HAVSEGTKAVTKYTSSK	4	9	2	P23527;P58876		1793.94	0	2.0201e+06	618014	0	3.339e-05	High	3.9778	High	3.30464	High	3.25363	2
	KESYSVYVYK	23	6	1	P58876		1265.64	4.92699e+06	1.27085e+07	1.25762e+07	0	2.57e-05	High	3.79419	High	4.09166	High	4.02861	1
	SRKESYSVYVYK	6	6	1	P58876		1508.78	1.10343e+06	5.51554e+06	7.04373e+06	0	2.961e-05	High	3.42759	High	4.33464	High	4.32128	2
	LLLPGELAK	273	9	2	P23527;P58876		953.604	2.42394e+08	3.66506e+08	3.81716e+08	0	0.003797	High	2.34282	High	2.53856	High	2.70767	0
	AMGIMNSFVNDIFERIAGEASR	5	9	2	P23527;P58876		2428.17	295200	2.20942e+06	2.61417e+06	0	0.004114	High	2.11706	High	2.20304	High	2.46285	1
	QVHPDTGISSK	3	9	2	P23527;P58876		1168.6	0	2.22244e+07	5.67566e+07	0	4.298e-05			High	3.96336	High	3.1026	0
	STITSREIQTAVR	2	9	2	P23527;P58876		1461.81	297288	0	309743	0.001	0.01793	High	2.76872			High	3.10223	1
	ESYSVYVYK	11	6	1	P58876		1137.55	2.25075e+07	6.32008e+07	6.52575e+07	0.001	0.006527	High	2.47738	High	2.60458	High	2.22027	0
	EIQTAVRLLLPGELAK	1	9	2	P23527;P58876		1751.04	202814	0	0	0.002	0.03172	High	2.3418					1
P23527	Histone H2B type 1-O OS=Homo sapiens OX=9606 GN=HIST1H2BO PE=1 SV=3 - [H2B1O_HUMAN]	69.05	3	3	11	896	1.24972e+08	2.27382e+08	2.40023e+08	902.365	69.05	10	401	595.847	58.73	9	252	576.904	69.05	10	243	126	13.8976	10.3159
	Sequence	# PSMs	# Proteins	# Protein Groups	Protein Group Accessions	Modifications	MH+ [Da]	A5: Area	B5: Area	C5: Area	q-Value	PEP	A2	XCorr A2	B2	XCorr B2	C2	XCorr C2	# Missed Cleavages
	AMGIMNSFVNDIFER	340	9	2	P23527;P58876		1743.82	1.09899e+08	2.67818e+08	2.81596e+08	0	1.528e-11	High	6.49801	High	5.8702	High	5.65831	0
	AMGIMNSFVNDIFER	143	9	2	P23527;P58876	M2(Oxidation)	1759.82	1.66764e+07	4.36591e+07	4.54822e+07	0	3.001e-09	High	5.58602	High	5.73937	High	6.08699	0
	AMGIMNSFVNDIFER	17	9	2	P23527;P58876	M2(Oxidation); M5(Oxidation)	1775.81	6.94509e+06	1.75548e+07	1.74621e+07	0	2.259e-08	High	5.44243	High	5.04557	High	4.97112	0
	VLKQVHPDTGISSK	70	9	2	P23527;P58876		1508.85	2.25244e+07	4.78226e+07	4.93003e+07	0	4.593e-07	High	4.58673	High	4.60813	High	5.15838	1
	HAVSEGTKAVTKYTSSK	4	9	2	P23527;P58876		1793.94	0	2.0201e+06	618014	0	3.339e-05	High	3.9778	High	3.30464	High	3.25363	2
	KESYSIYVYK	28	3	1	P23527		1279.66	6.35688e+06	1.39008e+07	1.54384e+07	0	0.0002656	High	3.68758	High	3.89522	High	3.85103	1
	SRKESYSIYVYK	3	3	1	P23527		1522.79	562871	3.28297e+06	4.19549e+06	0	0.002709	High	3.48692	High	2.62892	High	2.87413	2
	LLLPGELAK	273	9	2	P23527;P58876		953.604	2.42394e+08	3.66506e+08	3.81716e+08	0	0.003797	High	2.34282	High	2.53856	High	2.70767	0
	AMGIMNSFVNDIFERIAGEASR	5	9	2	P23527;P58876		2428.17	295200	2.20942e+06	2.61417e+06	0	0.004114	High	2.11706	High	2.20304	High	2.46285	1
	QVHPDTGISSK	3	9	2	P23527;P58876		1168.6	0	2.22244e+07	5.67566e+07	0	4.298e-05			High	3.96336	High	3.1026	0
	STITSREIQTAVR	2	9	2	P23527;P58876		1461.81	297288	0	309743	0.001	0.01793	High	2.76872			High	3.10223	1
	ESYSIYVYK	7	3	1	P23527		1151.56	2.26226e+07	4.54304e+07	5.23578e+07	0.001	0.02114	High	2.26408	High	2.16574	High	2.62943	0
	EIQTAVRLLLPGELAK	1	9	2	P23527;P58876		1751.04	202814	0	0	0.002	0.03172	High	2.3418					1
P23528	Cofilin-1 OS=Homo sapiens OX=9606 GN=CFL1 PE=1 SV=3 - [COF1_HUMAN]	68.67	1	6	10	58	4.22895e+06	1.09892e+07	1.13807e+07	74.4287	68.67	10	21	56.8297	58.43	8	18	56.3023	58.43	8	19	166	18.4907	8.08936
	Sequence	# PSMs	# Proteins	# Protein Groups	Protein Group Accessions	Modifications	MH+ [Da]	A5: Area	B5: Area	C5: Area	q-Value	PEP	A2	XCorr A2	B2	XCorr B2	C2	XCorr C2	# Missed Cleavages
	NIILEEGKEILVGDVGQTVDDPYATFVK	23	1	1	P23528		3062.59	4.33446e+06	1.36811e+07	1.32562e+07	0	1.634e-11	High	6.68769	High	5.04481	High	4.79387	1
	LTGIKHELQANCYEEVKDR	7	1	1	P23528	C12(Carbamidomethyl)	2303.15	378078	7.28051e+06	7.63752e+06	0	2.982e-08	High	4.89815	High	4.68074	High	3.3165	2
	LGGSAVISLEGKPL	3	1	1	P23528		1340.78	2.39025e+06	0	0	0	8.381e-08	High	4.18226					0
	YALYDATYETK	9	2	2	P23528;Q9Y281		1337.63	5.96213e+06	1.20059e+07	1.32484e+07	0	3.095e-06	High	4.11875	High	4.02919	High	4.08123	0
	HELQANCYEEVKDR	3	1	1	P23528	C7(Carbamidomethyl)	1790.82	124811	780208	724364	0	1.09e-08	High	4.0421	High	5.52842	High	4.87387	1
	EILVGDVGQTVDDPYATFVK	3	1	1	P23528		2166.1	190157	251088	266009	0	1.922e-05	High	3.90988	High	2.35258	High	3.21203	0
	AVLFCLSEDKK	3	1	1	P23528	C5(Carbamidomethyl)	1309.69	0	941716	1.20844e+06	0	0.0007842	High	2.86981	High	3.49343	High	3.55647	1
	KEDLVFIFWAPESAPLK	3	2	2	P23528;Q9Y281		1990.07	139524	663047	705659	0	0.0004626	High	2.63479	High	2.60676	High	1.205	1
	MIYASSKDAIK	3	3	3	P23528;Q9Y281;P60981		1226.64	0	155519	472268	0.002	0.02449	High	1.97618	High	2.8071	High	2.91881	1
	ESKKEDLVFIFWAPESAPLK	1	2	2	P23528;Q9Y281		2334.24	201422	0	0	0.005	0.062	High	2.05063					2
P04083	Annexin A1 OS=Homo sapiens OX=9606 GN=ANXA1 PE=1 SV=2 - [ANXA1_HUMAN]	68.5	1	27	27	258	1.64216e+07	4.50607e+07	4.77185e+07	289.811	68.21	26	91	274.945	64.74	23	80	284.506	68.5	26	87	346	38.69	7.02002
	Sequence	# PSMs	# Proteins	# Protein Groups	Protein Group Accessions	Modifications	MH+ [Da]	A5: Area	B5: Area	C5: Area	q-Value	PEP	A2	XCorr A2	B2	XCorr B2	C2	XCorr C2	# Missed Cleavages
	GLGTDEDTLIEILASR	29	1	1	P04083		1702.89	8.13975e+06	2.25491e+07	2.34038e+07	0	4.381e-10	High	6.06985	High	5.1253	High	5.06947	0
	GDRSEDFGVNEDLADSDAR	10	1	1	P04083		2067.89	6.79277e+06	1.75625e+07	1.89839e+07	0	2.695e-08	High	6.02992	High	4.59337	High	4.87328	1
	SEDFGVNEDLADSDAR	6	1	1	P04083		1739.74	1.69489e+06	4.14571e+06	4.66205e+06	0	2.483e-11	High	5.85333	High	5.73479	High	5.64134	0
	QAWFIENEEQEYVQTVK	14	1	1	P04083		2141.02	1.36869e+06	3.62227e+06	3.6069e+06	0	1.522e-10	High	5.44708	High	5.55402	High	6.14558	0
	GVDEATIIDILTK	8	1	1	P04083		1387.77	3.33887e+06	7.51764e+06	7.11836e+06	0	1.268e-07	High	5.13154	High	4.52613	High	4.27197	0
	DLAKDITSDTSGDFR	9	1	1	P04083		1640.78	4.0852e+06	9.26268e+06	9.78288e+06	0	1.956e-07	High	4.91077	High	4.74864	High	4.4352	1
	GTDVNVFNTILTTR	10	1	1	P04083		1550.82	5.94544e+06	1.59403e+07	1.70194e+07	0	1.749e-08	High	4.89302	High	4.55172	High	4.63382	0
	GGPGSAVSPYPTFNPSSDVAALHK	18	1	1	P04083		2356.16	1.89957e+07	5.22145e+07	5.69509e+07	0	7.813e-08	High	4.64439	High	5.27515	High	4.80861	0
	TPAQFDADELR	17	1	1	P04083		1262.6	1.6116e+07	4.00787e+07	4.12424e+07	0	1.188e-05	High	4.14938	High	4.73268	High	4.38948	0
	AAYLQETGKPLDETLKK	15	1	1	P04083		1905.03	1.09018e+07	4.28888e+07	4.49623e+07	0	2.562e-05	High	4.14556	High	4.21929	High	4.66705	1
	KGTDVNVFNTILTTR	8	1	1	P04083		1678.92	1.87847e+06	4.66218e+06	4.86806e+06	0	4.984e-07	High	4.10863	High	4.39951	High	4.99275	1
	GVDEATIIDILTKR	16	1	1	P04083		1543.87	1.41532e+07	2.95463e+07	3.08556e+07	0	3.128e-07	High	4.02982	High	4.37657	High	4.31722	1
	CATSKPAFFAEK	18	1	1	P04083	C1(Carbamidomethyl)	1356.67	2.03543e+06	7.08926e+06	8.45003e+06	0	0.00554	High	3.98481	High	3.98737	High	3.86655	0
	SEIDMNDIKAFYQK	2	1	1	P04083		1701.82	262371	0	415908	0	2.504e-05	High	3.86504			High	4.17765	1
	ALTGHLEEVVLALLK	14	1	1	P04083		1605.96	1.37406e+06	1.04781e+07	4.86494e+06	0	1.913e-08	High	3.85983	High	5.05299	High	4.4062	0
	SSKGGPGSAVSPYPTFNPSSDVAALHK	7	1	1	P04083		2658.32	1.57693e+06	7.89396e+06	8.08794e+06	0	2.7e-05	High	3.82131	High	2.81651	High	2.72739	1
	DITSDTSGDFR	10	1	1	P04083		1213.54	3.1044e+06	1.0995e+07	1.29348e+07	0	6.082e-06	High	3.77009	High	3.7427	High	4.04499	0
	NALLSLAKGDR	1	1	1	P04083		1157.66	307016	0	0	0	8.592e-05	High	3.56649					1
	AAYLQETGKPLDETLK	6	1	1	P04083		1776.94	761893	2.02389e+06	2.29864e+06	0	4.487e-05	High	3.36887	High	4.09698	High	2.72073	0
	TPAQFDADELRAAMK	9	1	1	P04083		1663.81	1.79262e+06	5.89289e+06	6.03775e+06	0	1.746e-06	High	3.21645	High	4.13005	High	3.7871	1
	MYGISLCQAILDETKGDYEK	8	1	1	P04083	C7(Carbamidomethyl)	2334.1	1.90169e+06	7.35231e+06	7.43794e+06	0	3.055e-05	High	2.9468	High	3.23915	High	3.15715	1
	SEIDMNDIK	10	1	1	P04083		1064.49	3.39996e+06	7.09024e+06	9.34665e+06	0	0.0003553	High	2.88441	High	3.17538	High	3.17341	0
	DLAKDITSDTSGDFRNALLSLAK	3	1	1	P04083		2451.28	350698	0	1.06473e+06	0	0.001219	High	2.64254			High	2.64961	2
	AAMKGLGTDEDTLIEILASR	2	1	1	P04083	M3(Oxidation)	2120.09	203128	0	317975	0	0.001478	High	2.49775			High	1.53431	1
	KALTGHLEEVVLALLK	3	1	1	P04083		1734.05	132012	223492	265667	0	0.0005789	High	2.01807	High	1.75853	High	2.22817	1
	RKGTDVNVFNTILTTR	2	1	1	P04083		1835.02	0	5.78697e+06	6.3128e+06	0	3.22e-06			High	3.64232	High	3.80053	2
	VLDLELKGDIEK	3	1	1	P04083		1371.77	1.14288e+06	481244	2.37372e+06	0.001	0.01029	High	2.30151	High	3.23897	High	2.58085	1
P14618	Pyruvate kinase PKM OS=Homo sapiens OX=9606 GN=PKM PE=1 SV=4 - [KPYM_HUMAN]	68.36	1	33	33	204	5.21077e+06	9.65913e+06	1.48449e+07	235.074	61.02	29	71	193.232	61.96	28	63	198.625	66.29	30	70	531	57.9	7.84033
	Sequence	# PSMs	# Proteins	# Protein Groups	Protein Group Accessions	Modifications	MH+ [Da]	A5: Area	B5: Area	C5: Area	q-Value	PEP	A2	XCorr A2	B2	XCorr B2	C2	XCorr C2	# Missed Cleavages
	AEGSDVANAVLDGADCIMLSGETAKGDYPLEAVR	8	1	1	P14618	C16(Carbamidomethyl)	3494.63	1.91822e+06	5.52957e+06	6.11178e+06	0	9.77e-13	High	6.66749	High	4.00803	High	3.65041	1
	QKGADFLVTEVENGGSLGSK	6	1	1	P14618		2036.03	1.08569e+06	4.15732e+06	4.24378e+06	0	1.231e-08	High	5.90579	High	4.54356	High	4.06859	1
	AGKPVICATQMLESMIK	11	1	1	P14618	C7(Carbamidomethyl)	1876.97	3.00515e+06	7.48617e+06	7.83905e+06	0	8.377e-09	High	5.41326	High	3.86032	High	4.04895	0
	GADFLVTEVENGGSLGSK	12	1	1	P14618		1779.88	2.34015e+06	6.82559e+06	6.97261e+06	0	8.671e-11	High	5.37377	High	6.16626	High	5.87328	0
	KGVNLPGAAVDLPAVSEKDIQDLK	11	1	1	P14618		2477.38	3.39097e+06	6.85294e+06	6.85211e+06	0	1.526e-08	High	5.07193	High	4.68017	High	4.75646	2
	LAPITSDPTEATAVGAVEASFK	16	1	1	P14618		2175.12	4.24377e+06	7.89107e+06	7.82685e+06	0	2.831e-11	High	4.99392	High	5.55543	High	4.73185	0
	LNFSHGTHEYHAETIK	7	1	1	P14618		1883.9	1.35214e+06	1.16801e+06	1.11636e+06	0	6.634e-08	High	4.83815	High	3.99696	High	3.97934	0
	NTGIICTIGPASR	8	1	1	P14618	C6(Carbamidomethyl)	1359.71	3.77503e+06	9.78378e+06	1.05878e+07	0	1.07e-05	High	4.70702	High	4.76997	High	4.78279	0
	RFDEILEASDGIMVAR	10	1	1	P14618		1821.92	1.44327e+06	4.03591e+06	3.99214e+06	0	8.496e-08	High	4.66536	High	4.22197	High	4.05514	1
	KGVNLPGAAVDLPAVSEK	5	1	1	P14618		1764.99	1.45653e+06	2.42149e+06	2.62006e+06	0	3.235e-08	High	4.65811	High	4.08272	High	3.50839	1
	GVNLPGAAVDLPAVSEK	6	1	1	P14618		1636.89	662861	1.63826e+06	1.5649e+06	0	5.388e-08	High	4.51748	High	3.95638	High	4.61506	0
	CDENILWLDYK	1	1	1	P14618	C1(Carbamidomethyl)	1468.68	467743	0	0	0	4.09e-05	High	4.28967					0
	IYVDDGLISLQVK	4	1	1	P14618		1462.82	697128	2.14928e+06	2.10786e+06	0	4.617e-08	High	4.17511	High	4.49012	High	4.52942	0
	LDIDSPPITAR	9	1	1	P14618		1197.65	4.11929e+06	1.12513e+07	1.10892e+07	0	5.996e-05	High	4.06762	High	3.89511	High	3.9137	0
	GIFPVLCKDPVQEAWAEDVDLR	6	1	1	P14618	C7(Carbamidomethyl)	2557.28	1.4226e+06	2.53818e+06	2.60603e+06	0	5.538e-07	High	4.03286	High	3.90759	High	3.09933	1
	AEGSDVANAVLDGADCIMLSGETAK	8	1	1	P14618	C16(Carbamidomethyl)	2494.15	722580	2.14131e+06	2.18509e+06	0	1.909e-06	High	3.82104	High	3.19467	High	2.7841	0
	ITLDNAYMEKCDENILWLDYK	2	1	1	P14618	C11(Carbamidomethyl)	2647.24	209928	0	679949	0	0.0001457	High	3.81513			High	2.45981	1
	CCSGAIIVLTK	2	1	1	P14618	C1(Carbamidomethyl); C2(Carbamidomethyl)	1221.63	733407	0	0	0	1.17e-05	High	3.51451					0
	GDLGIEIPAEK	4	1	1	P14618		1141.61	3.22003e+06	7.94237e+06	8.10609e+06	0	0.0001449	High	3.21858	High	3.13062	High	3.82408	0
	SVETLKEMIK	4	1	1	P14618		1177.65	1.45148e+06	2.31754e+06	2.62198e+06	0	0.001547	High	3.19814	High	3.55354	High	3.43732	1
	TATESFASDPILYRPVAVALDTKGPEIR	6	1	1	P14618		3017.6	7.26925e+06	1.23079e+06	2.28577e+07	0	2.564e-07	High	3.15389	High	2.08341	High	1.84842	1
	FGVEQDVDMVFASFIR	18	1	1	P14618		1859.9	173928	2.13653e+06	1.87518e+06	0	3.267e-08	High	3.03066	High	3.71528	High	3.39511	0
	GDLGIEIPAEKVFLAQK	4	1	1	P14618		1828.02	1.44406e+06	3860991	4.18405e+06	0	0.001865	High	2.74791	High	2.41895	High	1.62434	1
	TATESFASDPILYRPVAVALDTK	8	1	1	P14618		2465.29	1.32216e+06	4.03621e+06	4.06839e+06	0	5.526e-05	High	2.72983	High	3.41565	High	2.53988	0
	FGVEQDVDMVFASFIRK	4	1	1	P14618		1987.99	296803	1.13772e+06	1.18096e+06	0	0.002206	High	2.35434	High	1.51074	High	2.18166	1
	QKGADFLVTEVENGGSLGSKK	2	1	1	P14618		2164.13	170183	317107	0	0	0.002867	High	2.32769	High	2.89262			2
	GADFLVTEVENGGSLGSKK	2	1	1	P14618		1907.97	717209	0	2.9431e+06	0	0.004995	High	2.23141			High	3.12604	1
	GVNLPGAAVDLPAVSEKDIQDLK	7	1	1	P14618		2349.27	2.0542e+06	6.41471e+06	6.54702e+06	0	0.0001259	High	2.21139	High	2.37356	High	1.92801	1
	IISKIENHEGVR	2	1	1	P14618		1394.78	276648	0	0	0	0.0006916	High	2.15135			High	2.86794	1
	TGLIKGSGTAEVELKK	2	1	1	P14618		1630.95	0	0	0	0	0.001449			High	4.00233	High	3.13738	2
	ITLDNAYMEK	2	1	1	P14618		1197.58	0	3.48364e+06	4.00214e+06	0	0.0005694			High	3.22555	High	2.91509	0
	VNFAMNVGK	2	1	1	P14618		979.503	0	1.58302e+06	1.84089e+06	0	0.0007495			High	3.10734	High	3.32006	0
	APIIAVTRNPQTAR	2	1	1	P14618		1507.87	0	783980	872906	0	0.005781			High	2.16038	High	2.68968	1
	FGVEQDVDMVFASFIR	3	1	1	P14618	M9(Oxidation)	1875.89	0	368548	235893	0	0.001977			High	1.71845	High	1.20587	0
Q06830	Peroxiredoxin-1 OS=Homo sapiens OX=9606 GN=PRDX1 PE=1 SV=1 - [PRDX1_HUMAN]	68.34	1	14	15	101	8.16399e+06	2.18284e+07	2.33937e+07	97.3132	68.34	14	36	92.7677	68.34	14	32	89.9133	56.28	14	33	199	22.0963	8.1333
	Sequence	# PSMs	# Proteins	# Protein Groups	Protein Group Accessions	Modifications	MH+ [Da]	A5: Area	B5: Area	C5: Area	q-Value	PEP	A2	XCorr A2	B2	XCorr B2	C2	XCorr C2	# Missed Cleavages
	HGEVCPAGWKPGSDTIKPDVQK	6	1	1	Q06830	C5(Carbamidomethyl)	2406.19	4.44978e+06	1.65131e+07	1.85839e+07	0	5.992e-10	High	4.86201	High	4.28803	High	3.47736	0
	LVQAFQFTDKHGEVCPAGWKPGSDTIKPDVQK	7	1	1	Q06830	C15(Carbamidomethyl)	3583.8	4.22278e+06	1.35317e+07	1.52943e+07	0	2.176e-05	High	4.81059	High	3.62344	High	3.24633	1
	TIAQDYGVLKADEGISFR	9	1	1	Q06830		1983.02	3.26962e+06	8041781	7484973	0	1.642e-06	High	4.54261	High	3.50617	High	3.42148	1
	KQGGLGPMNIPLVSDPKR	11	1	1	Q06830		1907.06	3.06544e+06	8.88675e+06	9.23378e+06	0	7.867e-08	High	4.29052	High	3.71184	High	3.24325	2
	LVQAFQFTDK	9	1	1	Q06830		1196.63	3.85227e+06	9.13441e+06	9.9447e+06	0	1.414e-05	High	3.90568	High	4.176	High	3.96712	0
	LNCQVIGASVDSHFCHLAWVNTPK	3	1	1	Q06830	C3(Carbamidomethyl); C15(Carbamidomethyl)	2753.33	843664	2.53647e+06	0	0	8.227e-09	High	3.55957	High	2.90478			0
	QGGLGPMNIPLVSDPK	2	1	1	Q06830		1622.87	565679	0	564882	0	0.0008962	High	3.3343			High	3.48925	0
	ATAVMPDGQFKDISLSDYK	4	1	1	Q06830		2086.02	1.53799e+06	3.72589e+06	3.82479e+06	0	0.0009956	High	3.26472	High	3.15028	High	2.72577	1
	QITVNDLPVGR	10	2	2	Q06830;P32119		1211.68	1.43821e+07	3.54404e+07	3.63029e+07	0	1.416e-05	High	3.12329	High	3.37999	High	3.45083	0
	TIAQDYGVLK	6	1	1	Q06830		1107.61	2.18171e+06	6.02001e+06	6.69932e+06	0	5.431e-05	High	2.96723	High	3.33697	High	3.03573	0
	GLFIIDDKGILR	13	1	1	Q06830		1359.81	5.66006e+06	6.73757e+06	6.70187e+06	0	0.0001391	High	2.95471	High	3.62538	High	3.64216	1
	ATAVMPDGQFK	5	1	1	Q06830		1164.57	2.28199e+06	5.87289e+06	6.97215e+06	0	0.0008682	High	2.61641	High	3.03484	High	3.20301	0
	QGGLGPMNIPLVSDPKR	6	1	1	Q06830		1778.96	1.43839e+06	5.88311e+06	6.74511e+06	0	2.698e-05	High	2.25685	High	3.55896	High	3.56356	1
	KQGGLGPMNIPLVSDPKR	3	1	1	Q06830	M8(Oxidation)	1923.05	272168	375664	496428	0	0.004479	High	2.23845	High	2.10193	High	2.42632	2
	ATAVMPDGQFKDISLSDYKGK	5	1	1	Q06830		2271.13	893129	4.26447e+06	4.47219e+06	0	0.002871	High	2.0081	High	3.051	High	1.80658	2
	KQGGLGPMNIPLVSDPK	2	1	1	Q06830		1750.95	0	2.4981e+06	2.6252e+06	0	0.002677			High	2.59376	High	2.88809	1
P12277	Creatine kinase B-type OS=Homo sapiens OX=9606 GN=CKB PE=1 SV=1 - [KCRB_HUMAN]	67.98	1	20	20	227	1.46687e+07	2.88185e+07	2.97382e+07	245.838	67.98	20	78	220.858	63.25	17	72	206.302	65.88	17	77	381	42.6173	5.59229
	Sequence	# PSMs	# Proteins	# Protein Groups	Protein Group Accessions	Modifications	MH+ [Da]	A5: Area	B5: Area	C5: Area	q-Value	PEP	A2	XCorr A2	B2	XCorr B2	C2	XCorr C2	# Missed Cleavages
	GTGGVDTAAVGGVFDVSNADR	12	1	1	P12277		1964.94	1.43709e+06	4.77172e+06	4.7683e+06	0	1.991e-09	High	6.1168	High	5.97001	High	6.20198	0
	LAVEALSSLDGDLAGR	18	1	1	P12277		1586.84	7.58718e+06	1.66201e+07	1.58524e+07	0	1.709e-10	High	5.63643	High	5.16516	High	5.09005	0
	LEQGQAIDDLMPAQK	17	1	1	P12277		1656.83	8.96816e+06	1.96322e+07	2.07882e+07	0	4.58e-09	High	5.49041	High	4.99373	High	4.93537	0
	LGFSEVELVQMVVDGVK	34	1	1	P12277		1848.98	3.26002e+06	7.72327e+06	7.76128e+06	0	1.019e-09	High	5.43997	High	5.09872	High	5.36551	0
	SMTEAEQQQLIDDHFLFDKPVSPLLLASGMAR	15	1	1	P12277		3587.79	1.72438e+07	3.50943e+07	3.6882e+07	0	1.563e-09	High	5.26494	High	3.81675	High	4.30706	0
	FPAEDEFPDLSAHNNHMAK	12	1	1	P12277		2169.97	2.90477e+06	1.08206e+07	1.15519e+07	0	2.179e-06	High	4.86284	High	5.20544	High	4.40075	0
	SKDYEFMWNPHLGYILTCPSNLGTGLR	9	1	1	P12277	C18(Carbamidomethyl)	3169.53	3.10112e+06	8.39908e+06	9.0696e+06	0	1.732e-07	High	4.65134	High	2.1865	High	2.83054	1
	TFLVWVNEEDHLR	15	1	1	P12277		1657.83	2.60477e+06	6.05046e+06	5.76637e+06	0	7.361e-08	High	4.56894	High	4.20023	High	4.44611	0
	FCTGLTQIETLFK	15	1	1	P12277	C2(Carbamidomethyl)	1557.8	7.8601e+06	1.29477e+07	1.36177e+07	0	3.502e-08	High	4.37199	High	4.28142	High	4.41854	0
	LRFPAEDEFPDLSAHNNHMAK	21	1	1	P12277		2439.16	4.14213e+06	1.59728e+07	1.71528e+07	0	1.338e-05	High	4.31758	High	4.59254	High	4.87358	1
	RGTGGVDTAAVGGVFDVSNADR	4	1	1	P12277		2121.04	685830	2.48842e+06	2.48918e+06	0	4.379e-08	High	4.26398	High	5.12782	High	4.36455	1
	HGGYKPSDEHKTDLNPDNLQGGDDLDPNYVLSSR	7	1	1	P12277		3753.74	2.84669e+06	1.0918e+07	1.18521e+07	0	1.85e-06	High	3.95002	High	2.86918	High	3.79667	1
	VLTPELYAELR	10	1	1	P12277		1303.73	1.77941e+07	3.17289e+07	3.15444e+07	0	3.144e-05	High	3.19644	High	2.94998	High	2.67049	0
	LEQGQAIDDLMPAQK	6	1	1	P12277	M11(Oxidation)	1672.82	322507	0	882202	0	7.35e-07	High	3.17801	High	4.21357	High	4.00525	0
	SMTEAEQQQLIDDHFLFDKPVSPLLLASGMAR	6	1	1	P12277	M30(Oxidation)	3603.8	1.63533e+06	5.06551e+06	4.97763e+06	0	0.000194	High	3.14679	High	2.17788	High	1.96396	0
	DLFDPIIEDR	3	1	1	P12277		1232.62	1.33181e+06	3.25327e+06	3.73066e+06	0	1.647e-05	High	3.12682	High	3.18634	High	3.06176	0
	TDLNPDNLQGGDDLDPNYVLSSR	2	1	1	P12277		2518.18	148847	1.04463e+06	0	0	0.00296	High	2.84581	High	3.05553			0
	LGFSEVELVQMVVDGVK	2	1	1	P12277	M11(Oxidation)	1864.97	138731	0	306356	0	0.001757	High	2.81211			High	1.64368	0
	GIWHNDNKTFLVWVNEEDHLR	2	1	1	P12277		2622.28	270341	0	0	0	0.0002227	High	2.69552					1
	DYEFMWNPHLGYILTCPSNLGTGLR	4	1	1	P12277	C16(Carbamidomethyl)	2954.4	83161	581806	611913	0	0.0001871	High	2.51339	High	2.30853	High	1.89255	0
	GTGGVDTAAVGGVFDVSNADRLGFSEVELVQMVVDGVK	1	1	1	P12277		3794.89	0	0	0	0	0.0005463	High	1.35002					1
	LRFPAEDEFPDLSAHNNHMAK	2	1	1	P12277	M19(Oxidation)	2455.15	0	1.08914e+06	653708	0	0.003212			High	2.91636	High	3.06082	1
	GFCLPPHCSR	7	1	1	P12277	C3(Carbamidomethyl); C8(Carbamidomethyl)	1230.55	581972	1.09925e+06	2.02787e+06	0.001	0.01831	High	2.53145	High	2.49761	High	2.08302	0
	GGNMKEVFTR	3	1	1	P12277		1138.57	60740.5	0	0	0.002	0.0224	High	2.65856			High	2.42864	1
P21796	Voltage-dependent anion-selective channel protein 1 OS=Homo sapiens OX=9606 GN=VDAC1 PE=1 SV=2 - [VDAC1_HUMAN]	67.49	1	14	15	53	3.96322e+06	9.51204e+06	9.71974e+06	41.2459	37.81	9	16	64.8904	66.78	14	19	59.8523	66.78	14	18	283	30.7536	8.54346
	Sequence	# PSMs	# Proteins	# Protein Groups	Protein Group Accessions	Modifications	MH+ [Da]	A5: Area	B5: Area	C5: Area	q-Value	PEP	A2	XCorr A2	B2	XCorr B2	C2	XCorr C2	# Missed Cleavages
	VNNSSLIGLGYTQTLKPGIK	7	1	1	P21796		2103.18	8.60647e+06	1.77975e+07	1.78572e+07	0	1.235e-07	High	4.79853	High	3.35843	High	3.62981	0
	WTEYGLTFTEK	4	1	1	P21796		1374.66	1.1083e+06	2.53505e+06	2.42476e+06	0	4.713e-06	High	3.63299	High	3.98113	High	3.74068	0
	LTFDSSFSPNTGKK	6	1	1	P21796		1528.77	1.42707e+06	5.60955e+06	5.88083e+06	0	1.825e-05	High	3.57618	High	4.23533	High	4.20155	1
	VTQSNFAVGYK	4	1	1	P21796		1213.62	1.2032e+06	2.45662e+06	2.5082e+06	0	9.493e-06	High	3.5419	High	3.74995	High	3.69203	0
	LTLSALLDGK	7	2	2	Q9Y277;P21796		1030.62	1.26492e+06	2.01131e+06	2.02069e+06	0	4.823e-05	High	2.99225	High	3.53115	High	3.20375	0
	YQIDPDACFSAK	3	1	1	P21796	C8(Carbamidomethyl)	1414.63	1.85613e+06	5.12903e+06	5.42121e+06	0	6.16e-05	High	2.93876	High	3.08158	High	3.27711	0
	EHINLGCDMDFDIAGPSIR	3	1	1	P21796	C7(Carbamidomethyl)	2159.99	376254	1.03483e+06	883239	0	0.00349	High	2.90025	High	2.29105	High	2.40329	0
	SRVTQSNFAVGYK	1	1	1	P21796		1456.76	46765.7	0	0	0	0.004723	High	2.75738					1
	LTLSALLDGKNVNAGGHK	4	1	1	P21796		1808.01	681023	1.00982e+06	1.03931e+06	0	1.902e-06	High	2.38864	High	1.34057	High	2.02195	1
	TKSENGLEFTSSGSANTETTK	3	1	1	P21796		2189.02	0	846529	892433	0	2.367e-07			High	5.58352	High	4.86198	1
	SENGLEFTSSGSANTETTK	2	1	1	P21796		1959.88	0	293266	263458	0	7.308e-09			High	5.26605	High	5.14086	0
	TDEFQLHTNVNDGTEFGGSIYQK	2	1	1	P21796		2600.2	0	919080	774777	0	4.294e-06			High	4.48472	High	4.27588	0
	WNTDNTLGTEITVEDQLAR	3	1	1	P21796		2176.06	0	1.47411e+06	508412	0	2.747e-07			High	3.76052	High	4.22088	0
	GLKLTFDSSFSPNTGKK	2	1	1	P21796		1826.97	0	629039	697704	0	0.000558			High	3.49498	High	3.93595	2
	KLETAVNLAWTAGNSNTR	2	1	1	P21796		1946.02	0	1.42493e+06	1.66601e+06	0.001	0.01111			High	3.59641	High	3.40184	1
P06733	Alpha-enolase OS=Homo sapiens OX=9606 GN=ENO1 PE=1 SV=2 - [ENOA_HUMAN]	67.05	1	18	21	155	8.07871e+06	1.38539e+07	1.43653e+07	164.122	57.37	18	49	178.525	58.29	18	53	177.139	62.9	18	53	434	47.1393	7.38623
	Sequence	# PSMs	# Proteins	# Protein Groups	Protein Group Accessions	Modifications	MH+ [Da]	A5: Area	B5: Area	C5: Area	q-Value	PEP	A2	XCorr A2	B2	XCorr B2	C2	XCorr C2	# Missed Cleavages
	HIADLAGNSEVILPVPAFNVINGGSHAGNK	14	1	1	P06733		3011.57	6.44035e+06	1.2624e+07	1.29267e+07	0	1.241e-08	High	6.0027	High	4.43856	High	3.64959	0
	SFIKDYPVVSIEDPFDQDDWGAWQK	9	1	1	P06733		2985.4	1.1282e+06	3.30736e+06	3.57786e+06	0	6.195e-08	High	5.42958	High	5.42762	High	5.50119	1
	YGKDATNVGDEGGFAPNILENKEGLELLK	8	1	1	P06733		3091.56	5.7296e+06	1.26533e+07	1.29339e+07	0	1.973e-08	High	5.36693	High	3.3245	High	3.71728	2
	VNQIGSVTESLQACK	18	2	2	P13929;P06733	C14(Carbamidomethyl)	1633.83	2.22484e+06	4.49011e+06	5.19995e+06	0	2.604e-10	High	4.90685	High	5.35547	High	5.29531	0
	AAVPSGASTGIYEALELR	8	3	3	P06733;P13929;P09104		1804.95	1.58506e+06	3.99505e+06	3.96972e+06	0	9.411e-10	High	4.62627	High	4.75491	High	5.27673	0
	SGKYDLDFKSPDDPSR	10	1	1	P06733		1826.86	1.63826e+06	6.93091e+06	7.22278e+06	0	1.989e-05	High	4.4294	High	3.64139	High	3.59741	2
	LAMQEFMILPVGAANFR	17	1	1	P06733		1908	3.80719e+06	5.41281e+06	5.1951e+06	0	7.963e-06	High	4.26896	High	4.33452	High	3.57562	0
	LAQANGWGVMVSHR	7	1	1	P06733		1525.77	2.71262e+06	6.69102e+06	8.06118e+06	0	4.793e-07	High	4.14122	High	4.07048	High	4.35183	0
	DATNVGDEGGFAPNILENK	3	1	1	P06733		1960.94	263631	905247	982747	0	3.97e-07	High	4.11375	High	5.02792	High	5.04736	0
	IGAEVYHNLK	10	1	1	P06733		1143.62	3.10445e+06	6.31415e+06	7.27952e+06	0	1.82e-05	High	3.67011	High	4.03209	High	3.96237	0
	YISPDQLADLYK	11	1	1	P06733		1425.73	1.20662e+07	1.62843e+07	1.72354e+07	0	1.495e-06	High	3.48993	High	4.36609	High	4.61243	0
	YGKDATNVGDEGGFAPNILENK	3	1	1	P06733		2309.11	508675	1.60049e+06	1.68944e+06	0	1.334e-06	High	3.44769	High	4.55229	High	4.03032	1
	LMIEMDGTENK	6	1	1	P06733		1280.59	805396	2.07462e+06	2.19533e+06	0	1.361e-06	High	3.44058	High	4.42293	High	3.74278	0
	LAMQEFMILPVGAANFR	13	1	1	P06733	M3(Oxidation)	1923.99	386930	1.25e+06	1.37992e+06	0	2.08e-06	High	3.3669	High	3.51462	High	2.85696	0
	DATNVGDEGGFAPNILENKEGLELLK	5	1	1	P06733		2743.39	2.24917e+06	5.84969e+06	6.16694e+06	0	0.0001253	High	3.29699	High	3.34517	High	3.78338	1
	GNPTVEVDLFTSK	3	1	1	P06733		1406.72	1.209e+06	4.02037e+06	3.79589e+06	0	4.769e-06	High	3.26522	High	4.26881	High	3.9671	0
	FTASAGIQVVGDDLTVTNPKR	3	1	1	P06733		2189.16	205765	2.40607e+06	2.53786e+06	0	0.0034	High	2.10239	High	2.38254	High	3.08841	1
	FTASAGIQVVGDDLTVTNPK	1	1	1	P06733		2033.06	0	126305	0	0	1.309e-05			High	3.46784			0
	SGETEDTFIADLVVGLCTGQIK	3	3	3	P06733;P13929;P09104	C17(Carbamidomethyl)	2353.16	0	319946	204293	0	0.0006124			High	2.19567	High	1.90755	0
	EIFDSRGNPTVEVDLFTSK	1	1	1	P06733		2154.07	0	0	0	0.001	0.02172	High	2.62124					1
	AGYTDKVVIGMDVAASEFFR	1	1	1	P06733		2176.08	0	0	899187	0.004	0.04771					High	1.84575	1
	KLNVTEQEKIDK	1	1	1	P06733		1444.8	0	0	0	0.009	0.108	High	1.56456					2
P10599	Thioredoxin OS=Homo sapiens OX=9606 GN=TXN PE=1 SV=3 - [THIO_HUMAN]	66.67	1	9	9	39	3.55037e+06	7.47087e+06	7.78893e+06	38.9327	66.67	8	16	28.8329	42.86	4	10	32.0451	65.71	6	13	105	11.7297	4.91943
	Sequence	# PSMs	# Proteins	# Protein Groups	Protein Group Accessions	Modifications	MH+ [Da]	A5: Area	B5: Area	C5: Area	q-Value	PEP	A2	XCorr A2	B2	XCorr B2	C2	XCorr C2	# Missed Cleavages
	MIKPFFHSLSEK	9	1	1	P10599		1463.77	3.30782e+06	8.14468e+06	8.90813e+06	0	1.515e-07	High	4.17411	High	3.36891	High	3.82215	0
	TAFQEALDAAGDK	3	1	1	P10599		1336.64	207431	427486	430244	0	1.557e-06	High	3.39277	High	4.16731	High	3.60625	0
	EKLEATINELV	4	1	1	P10599		1258.69	1.078e+06	2.01213e+06	1.80759e+06	0	0.0001416	High	3.23817	High	3.71125	High	3.73443	1
	VGEFSGANKEKLEATINELV	1	1	1	P10599		2148.12	355990	0	0	0	0.00169	High	2.78699					2
	MIKPFFHSLSEK	7	1	1	P10599	M1(Oxidation)	1479.77	623503	2.56004e+06	2.75181e+06	0	0.005422	High	2.43326	High	2.58255	High	3.05813	0
	CMPTFQFFK	8	1	1	P10599	C1(Carbamidomethyl)	1205.55	6.2653e+06	1.22558e+07	1.26511e+07	0	0.005385	High	2.29311	High	2.74986	High	2.76512	0
	LEATINELV	1	1	1	P10599		1001.55	416824	0	0	0.001	0.009012	High	2.81823					0
	TAFQEALDAAGDKLVVVDFSATWCGPCK	2	1	1	P10599	C24(Carbamidomethyl); C27(Carbamidomethyl)	3056.45	0	0	211935	0.001	0.008681	High	1.54582			High	1.9181	1
	VGEFSGANK	1	1	1	P10599		908.447	0	0	495868	0.001	0.01271					High	2.7492	0
	CMPTFQFFK	2	1	1	P10599	C1(Carbamidomethyl); M2(Oxidation)	1221.54	0	943642	1.6356e+06	0.004	0.04884			High	1.85446	High	2.05968	0
	CMPTFQFFKK	1	1	1	P10599	C1(Carbamidomethyl)	1333.64	428515	0	0	0.008	0.1014	High	1.79849					1
P00558	Phosphoglycerate kinase 1 OS=Homo sapiens OX=9606 GN=PGK1 PE=1 SV=3 - [PGK1_HUMAN]	65.47	1	17	17	91	4.20395e+06	8.34806e+06	8.51195e+06	96.6395	65.47	17	33	91.0885	62.59	16	31	79.1026	62.59	15	27	417	44.5861	8.104
	Sequence	# PSMs	# Proteins	# Protein Groups	Protein Group Accessions	Modifications	MH+ [Da]	A5: Area	B5: Area	C5: Area	q-Value	PEP	A2	XCorr A2	B2	XCorr B2	C2	XCorr C2	# Missed Cleavages
	ACANPAAGSVILLENLR	15	1	1	P00558	C2(Carbamidomethyl)	1768.94	1.63061e+06	3.84534e+06	4.25038e+06	0	1.758e-10	High	5.3911	High	5.58019	High	5.98064	0
	LGDVYVNDAFGTAHR	5	1	1	P00558		1634.8	936902	1.18349e+07	1.26024e+07	0	4.167e-08	High	4.68682	High	4.32651	High	4.21127	0
	WNTEDKVSHVSTGGGASLELLEGK	3	1	1	P00558		2514.25	106418	452100	446996	0	2.663e-06	High	4.57599	High	3.21377	High	4.69429	1
	GCITIIGGGDTATCCAK	5	1	1	P00558	C2(Carbamidomethyl); C14(Carbamidomethyl); C15(Carbamidomethyl)	1754.79	289422	965409	1.04486e+06	0	2.944e-10	High	4.35947	High	5.09581	High	5.25612	0
	SVVLMSHLGRPDGVPMPDKYSLEPVAVELK	7	1	1	P00558		3263.73	2.41039e+06	3.46072e+06	2.67757e+06	0	7.926e-06	High	4.0764	High	2.17286	High	2.4776	1
	ALESPERPFLAILGGAK	10	1	1	P00558		1769	2.54902e+06	7.05789e+06	7.39647e+06	0	7.629e-07	High	4.03035	High	3.41329	High	3.8691	0
	SLLGKDVLFLKDCVGPEVEK	5	1	1	P00558	C13(Carbamidomethyl)	2246.22	495928	1.02232e+06	0	0	0.0002999	High	3.76785	High	2.79675	High	2.10244	2
	ITLPVDFVTADKFDENAK	4	1	1	P00558		2023.04	6.13243e+06	443900	436178	0	8.959e-06	High	3.67178	High	3.91526	High	3.35556	1
	VLNNMEIGTSLFDEEGAK	4	1	1	P00558		1966.95	507740	1.49813e+06	1.61485e+06	0	3.814e-08	High	3.65534	High	4.62662	High	5.2896	0
	VDFNVPMKNNQITNNQR	4	1	1	P00558		2032.01	1.28461e+06	2.65711e+06	2.82934e+06	0	2.246e-05	High	3.48363	High	3.08619	High	3.52492	1
	DVLFLKDCVGPEVEK	2	1	1	P00558	C8(Carbamidomethyl)	1747.89	352843	1.23467e+06	0	0	0.0009776	High	3.41956	High	2.74209			1
	TGQATVASGIPAGWMGLDCGPESSKK	7	1	1	P00558	C19(Carbamidomethyl)	2605.24	1.28642e+06	3.47446e+06	3.68999e+06	0	0.0001249	High	3.41736	High	2.81389	High	2.50537	1
	AHSSMVGVNLPQK	3	1	1	P00558		1367.71	445317	2.74634e+06	2.71704e+06	0	3.042e-05	High	3.2445	High	3.56895	High	3.39692	0
	SLLGKDVLFLK	4	1	1	P00558		1232.76	394926	437135	423997	0	0.004542	High	3.17567	High	3.3394	High	3.18041	1
	QIVWNGPVGVFEWEAFAR	5	1	1	P00558		2105.06	55822.1	388997	423349	0	0.0004092	High	2.50134	High	2.07989	High	1.80765	0
	VLPGVDALSNI	7	1	1	P00558		1097.62	3.93041e+06	6.15141e+06	5.537e+06	0	6.892e-05	High	2.46131	High	3.04681	High	3.20011	0
	VKAEPAKIEAFR	1	1	1	P00558		1358.78	366029	0	0	0.009	0.1037	High	1.86391					2
Q16555	Dihydropyrimidinase-related protein 2 OS=Homo sapiens OX=9606 GN=DPYSL2 PE=1 SV=1 - [DPYL2_HUMAN]	65.38	1	24	26	208	1.04215e+07	2.2771e+07	2.25877e+07	216.469	63.46	24	70	214.441	64.34	25	68	214.54	64.34	25	70	572	62.2546	6.37939
	Sequence	# PSMs	# Proteins	# Protein Groups	Protein Group Accessions	Modifications	MH+ [Da]	A5: Area	B5: Area	C5: Area	q-Value	PEP	A2	XCorr A2	B2	XCorr B2	C2	XCorr C2	# Missed Cleavages
	FQMPDQGMTSADDFFQGTK	14	1	1	Q16555		2150.92	2.56539e+06	4.80338e+06	4.7951e+06	0	2.90646e-12	High	5.60354	High	4.87879	High	6.18657	0
	MDENQFVAVTSTNAAK	9	2	2	Q16555;Q14195		1725.82	2.98551e+06	8.60123e+06	9.19849e+06	0	8.864e-07	High	5.47967	High	5.58974	High	5.671	0
	NLHQSGFSLSGAQIDDNIPR	4	1	1	Q16555		2169.07	3.93764e+06	1.02308e+07	1.0814e+07	0	7.646e-09	High	5.47881	High	4.29311	High	4.18456	0
	AITIANQTNCPLYITK	10	1	1	Q16555	C10(Carbamidomethyl)	1820.96	3.0671e+06	6.47231e+06	6.98913e+06	0	4.334e-07	High	5.41282	High	5.05624	High	5.46904	0
	GLYDGPVCEVSVTPK	10	1	1	Q16555	C8(Carbamidomethyl)	1620.79	4.98748e+06	1.41814e+07	1.46874e+07	0	2.367e-07	High	4.7466	High	4.68885	High	4.63725	0
	IAVGSDADLVIWDPDSVK	12	1	1	Q16555		1899.98	964625	2.66099e+06	2.65464e+06	0	1.918e-07	High	4.67089	High	4.92231	High	4.58075	0
	AVGKDNFTLIPEGTNGTEER	8	1	1	Q16555		2148.06	2.16371e+06	6.53897e+06	6.95398e+06	0	3.731e-05	High	4.33488	High	4.50694	High	3.78697	1
	THNSSLEYNIFEGMECR	8	1	1	Q16555	C16(Carbamidomethyl)	2086.9	1.27835e+06	3.74757e+06	3.64447e+06	0	1.263e-07	High	4.33455	High	3.04752	High	3.66067	0
	KKGTVVYGEPITASLGTDGSHYWSK	7	1	1	Q16555		2681.37	1.96604e+06	6.19096e+06	6.5135e+06	0	3.176e-06	High	4.05475	High	2.94631	High	4.28078	2
	DIGAIAQVHAENGDIIAEEQQR	4	1	1	Q16555		2377.18	1.17827e+06	3.22166e+07	3.27775e+07	0	1.205e-06	High	4.02178	High	2.69846	High	3.2651	0
	MSVIWDKAVVTGK	4	1	1	Q16555		1433.78	531725	1.16396e+06	1.39019e+06	0	1.429e-06	High	3.9225	High	3.35452	High	1.81137	1
	NLHQSGFSLSGAQIDDNIPRR	6	1	1	Q16555		2325.17	912183	3.31461e+06	3.63982e+06	0	1.45e-07	High	3.85185	High	2.64908	High	2.7864	1
	IVLEDGTLHVTEGSGR	7	1	1	Q16555		1682.87	4.24662e+06	11571096	1.17775e+07	0	1.334e-05	High	3.80255	High	4.40777	High	2.70819	0
	GSPLVVISQGK	10	1	1	Q16555		1084.64	2.20566e+06	4.93595e+06	5.50874e+06	0	0.0001319	High	3.76185	High	4.09375	High	3.50389	0
	FQMPDQGMTSADDFFQGTK	8	1	1	Q16555	M3(Oxidation)	2166.91	375342	725836	775527	0	3.144e-07	High	3.49678	High	3.91444	High	3.37795	0
	FQLTDCQIYEVLSVIR	14	1	1	Q16555	C6(Carbamidomethyl)	1984.02	226422	996841	931097	0	1.061e-06	High	3.42091	High	2.6756	High	2.76936	0
	KPFPDFVYKR	9	1	1	Q16555		1296.71	1.80783e+06	4.80999e+06	5.52211e+06	0	8.921e-06	High	3.28309	High	3.62359	High	3.1413	1
	IVNDDQSFYADIYMEDGLIK	6	2	2	Q16555;Q14195		2349.1	197643	1.34149e+06	1.11397e+06	0	2.703e-09	High	3.20259	High	4.06584	High	3.79855	0
	QIGENLIVPGGVK	9	1	1	Q16555		1323.76	6.81044e+06	1.35553e+07	1.30615e+07	0	9.533e-06	High	3.13407	High	3.31173	High	3.55936	0
	MDENQFVAVTSTNAAK	3	2	2	Q16555;Q14195	M1(Oxidation)	1741.81	48004.1	198687	206186	0	6.525e-06	High	3.11649	High	2.5946	High	4.07252	0
	AALAGGTTMIIDHVVPEPGTSLLAAFDQWR	6	1	1	Q16555		3137.6	924067	2.47427e+06	1.95861e+06	0	4.011e-05	High	2.88641	High	2.45595	High	2.14116	0
	ILDLGITGPEGHVLSRPEEVEAEAVNR	13	1	1	Q16555		2900.52	1.61383e+07	2.19151e+07	2.02981e+07	0	0.001614	High	2.81956	High	3.21324	High	3.23198	0
	MVIPGGIDVHTR	9	1	1	Q16555		1294.7	8.3159e+06	1.3415e+07	1.43601e+07	0	5.942e-06	High	2.55963	High	2.9074	High	3.33169	0
	DNFTLIPEGTNGTEER	5	1	1	Q16555		1792.84	794091	2.98015e+06	3.10731e+06	0	2.87e-05	High	2.49058	High	3.43672	High	2.63624	0
	AALAGGTTMIIDHVVPEPGTSLLAAFDQWREWADSK	3	1	1	Q16555		3853.91	321690	0	0	0	0.001155	High	2.31849					1
	GTVVYGEPITASLGTDGSHYWSK	5	1	1	Q16555		2425.17	1.40717e+06	4.13048e+06	4.61728e+06	0	0.005272	High	2.16953	High	2.04689	High	1.67307	0
	GIQEEMEALVK	2	1	1	Q16555		1246.64	0	1.09499e+06	1.02748e+06	0	1.848e-05			High	3.72905	High	3.75223	0
	KPFPDFVYK	2	1	1	Q16555		1140.61	0	929817	1.1737e+06	0	0.00417			High	2.71264	High	3.02271	0
	MVIPGGIDVHTR	1	1	1	Q16555	M1(Oxidation)	1310.69	795880	0	0	0.001	0.01366	High	2.50948					0
Q99714	3-hydroxyacyl-CoA dehydrogenase type-2 OS=Homo sapiens OX=9606 GN=HSD17B10 PE=1 SV=3 - [HCD2_HUMAN]	65.13	1	9	9	20	480106	1.05553e+06	1.0684e+06	23.3293	45.59	6	7	17.2161	42.53	5	6	18.3542	50.19	6	7	261	26.9061	7.78174
	Sequence	# PSMs	# Proteins	# Protein Groups	Protein Group Accessions	Modifications	MH+ [Da]	A5: Area	B5: Area	C5: Area	q-Value	PEP	A2	XCorr A2	B2	XCorr B2	C2	XCorr C2	# Missed Cleavages
	LVGQGASAVLLDLPNSGGEAQAK	6	1	1	Q99714		2195.17	320973	1.53816e+06	1.39666e+06	0	8.038e-08	High	4.31582	High	4.26725	High	4.90096	0
	GLVAVITGGASGLGLATAER	3	1	1	Q99714		1813.02	374385	321672	318649	0	9.345e-08	High	4.02207	High	3.82378	High	4.32001	0
	GGIVGMTLPIAR	1	1	1	Q99714		1184.69	654411	0	0	0	5.342e-05	High	3.85547					0
	LVAGEMGQNEPDQGGQR	3	1	1	Q99714		1785.82	78233.5	268376	311057	0	4.122e-06	High	3.03618	High	3.96583	High	3.61203	0
	KLGNNCVFAPADVTSEKDVQTALALAK	1	1	1	Q99714	C6(Carbamidomethyl)	2860.49	411522	0	0	0	0.0008269	High	2.4641					2
	VMTIAPGLFGTPLLTSLPEK	2	1	1	Q99714		2085.18	169473	0	224876	0	0.005026	High	2.13073			High	2.17817	0
	GVIINTASVAAFEGQVGQAAYSASK	2	1	1	Q99714		2439.25	0	1.20454e+06	1.20796e+06	0.001	0.01276			High	1.78191	High	1.78403	0
	LGDPAEYAHLVQAIIENPFLNGEVIR	1	1	1	Q99714		2878.51	0	0	600596	0.002	0.02972					High	0.640353	0
	LGNNCVFAPADVTSEKDVQTALALAK	1	1	1	Q99714	C5(Carbamidomethyl)	2732.4	0	423879	0	0.006	0.0766			High	2.42156			1
Q99497	Protein/nucleic acid deglycase DJ-1 OS=Homo sapiens OX=9606 GN=PARK7 PE=1 SV=2 - [PARK7_HUMAN]	65.08	1	9	9	33	1.2336e+06	3.9443e+06	3.82665e+06	25.1507	65.08	8	12	23.7096	65.08	8	11	23.1627	65.08	8	10	189	19.8785	6.78564
	Sequence	# PSMs	# Proteins	# Protein Groups	Protein Group Accessions	Modifications	MH+ [Da]	A5: Area	B5: Area	C5: Area	q-Value	PEP	A2	XCorr A2	B2	XCorr B2	C2	XCorr C2	# Missed Cleavages
	VTVAGLAGKDPVQCSR	6	1	1	Q99497	C14(Carbamidomethyl)	1657.87	1.48714e+06	5.69541e+06	5.82085e+06	0	2.799e-06	High	4.36439	High	3.88414	High	3.94008	1
	GAEEMETVIPVDVMR	3	1	1	Q99497		1675.81	1.30638e+06	3.38682e+06	3.72897e+06	0	5.263e-09	High	4.12179	High	4.16612	High	3.63611	0
	EGPYDVVVLPGGNLGAQNLSESAAVK	4	1	1	Q99497		2584.33	907281	2.21208e+06	1.93012e+06	0	0.001713	High	2.84044	High	2.46576	High	2.99447	0
	DVVICPDASLEDAKK	3	1	1	Q99497	C5(Carbamidomethyl)	1659.83	409270	360113	364012	0	5.767e-08	High	2.82273	High	3.52681	High	4.11968	1
	GPGTSFEFALAIVEALNGKEVAAQVK	8	1	1	Q99497		2646.42	791226	2.0805e+06	1.6471e+06	0	8.928e-05	High	2.70904	High	2.13974	High	1.66774	1
	GAEEMETVIPVDVMRR	2	1	1	Q99497		1831.91	767292	2.75066e+06	0	0	0.001105	High	2.14614	High	2.21278			1
	GPGTSFEFALAIVEALNGK	1	1	1	Q99497		1921.01	39786	0	0	0	0.0006123	High	1.89358					0
	KGLIAAICAGPTALLAHEIGFGSK	3	1	1	Q99497	C8(Carbamidomethyl)	2395.32	372712	748831	797283	0	0.0002785	High	1.86936	High	1.90313	High	2.09441	1
	GLIAAICAGPTALLAHEIGFGSK	2	1	1	Q99497	C7(Carbamidomethyl)	2267.23	0	1.23567e+06	1.25121e+06	0	0.003259			High	1.96695	High	1.99981	0
	GAEEMETVIPVDVMRR	1	1	1	Q99497	M14(Oxidation)	1847.9	0	0	687666	0	0.0007738					High	3.18411	1
P68104	Elongation factor 1-alpha 1 OS=Homo sapiens OX=9606 GN=EEF1A1 PE=1 SV=1 - [EF1A1_HUMAN]	64.94	2	19	19	150	1.10941e+07	2.72996e+07	3.09084e+07	112.281	61.69	17	51	130.284	46.32	14	46	138.228	43.94	13	53	462	50.1091	9.01221
	Sequence	# PSMs	# Proteins	# Protein Groups	Protein Group Accessions	Modifications	MH+ [Da]	A5: Area	B5: Area	C5: Area	q-Value	PEP	A2	XCorr A2	B2	XCorr B2	C2	XCorr C2	# Missed Cleavages
	SGDAAIVDMVPGKPMCVESFSDYPPLGR	9	2	1	P68104	C16(Carbamidomethyl)	2995.4	4.86223e+06	1.04058e+07	1.12061e+07	0	7.165e-09	High	5.23484	High	4.32012	High	4.35046	0
	VETGVLKPGMVVTFAPVNVTTEVK	6	2	1	P68104	M10(Oxidation)	2531.39	1.58819e+06	3.06341e+06	2.838e+06	0	5.615e-08	High	5.07708	High	3.97079	High	3.24284	0
	VETGVLKPGMVVTFAPVNVTTEVK	14	2	1	P68104		2515.39	1.38252e+07	3.58255e+07	3.6278e+07	0	9.648e-09	High	4.93607	High	3.31139	High	3.22862	0
	EHALLAYTLGVK	8	2	1	P68104		1314.75	1.47951e+06	2.70301e+06	2.78588e+06	0	1.644e-06	High	4.26883	High	4.00427	High	3.82475	0
	IGGIGTVPVGR	10	2	1	P68104		1025.61	1.32927e+07	3.56674e+07	3.8161e+07	0	1.139e-05	High	4.10583	High	3.84081	High	3.92666	0
	TIEKFEKEAAEMGK	8	2	1	P68104		1610.81	1.8091e+06	5.24021e+06	5.83435e+06	0	2.82e-06	High	3.89841	High	3.74134	High	3.15491	2
	YYVTIIDAPGHR	7	2	1	P68104		1404.73	2.73286e+06	5.62578e+06	6.22726e+06	0	1.743e-06	High	3.83376	High	4.20109	High	3.58735	0
	NMITGTSQADCAVLIVAAGVGEFEAGISK	10	2	1	P68104	C11(Carbamidomethyl)	2909.44	163581	2.55321e+06	1.75532e+06	0	3.6e-07	High	3.52364	High	2.65763	High	2.7522	0
	KIGYNPDTVAFVPISGWNGDNMLEPSANMPWFK	3	2	1	P68104		3695.78	994843	1.35276e+06	0	0	0.003324	High	3.41856	High	1.82589			1
	IGYNPDTVAFVPISGWNGDNMLEPSANMPWFK	2	2	1	P68104		3567.67	1.77574e+06	0	0	0	0.0002598	High	2.94059					0
	YYVTIIDAPGHRDFIK	7	2	1	P68104		1908.01	1.10995e+06	2.22209e+06	2.38094e+06	0	2.753e-05	High	2.7915	High	2.30257	High	2.40914	1
	DGNASGTTLLEALDCILPPTRPTDKPLRLPLQDVYK	7	2	1	P68104	C15(Carbamidomethyl)	3978.1	6.16458e+06	0	1.82862e+07	0	2.973e-05	High	2.72391			High	2.59953	1
	STTTGHLIYK	24	2	1	P68104		1120.6	437771	659068	1.18254e+06	0	0.002549	High	2.27156	High	3.22051	High	3.38584	0
	YEEIVKEVSTYIKK	5	2	1	P68104		1728.94	521620	1.67348e+06	1.6826e+06	0	4.255e-05	High	2.04005	High	3.66409	High	3.20609	2
	DGNASGTTLLEALDCILPPTRPTDKPLR	1	2	1	P68104	C15(Carbamidomethyl)	3021.57	929115	0	0	0	7.774e-05	High	2.03202					0
	QTVAVGVIK	14	2	1	P68104		914.568	6.03572e+06	8.06989e+06	1.06147e+07	0	0.002974	High	1.96642	High	2.75622	High	2.7221	0
	YEEIVKEVSTYIK	2	2	1	P68104		1600.85	0	699379	627926	0	2.231e-06			High	3.42383	High	3.92512	1
	THINIVVIGHVDSGK	1	2	1	P68104		1588.88	0	811765	0	0	0.001099			High	3.0653			0
	SGDAAIVDMVPGKPMCVESFSDYPPLGR	7	2	1	P68104	M9(Oxidation); C16(Carbamidomethyl)	3011.4	0	1.17188e+06	1.38163e+06	0	0.000202			High	2.78661	High	3.39272	0
	KDGNASGTTLLEALDCILPPTRPTDKPLRLPLQDVYK	3	2	1	P68104	C16(Carbamidomethyl)	4106.2	2.91854e+06	0	0	0.001	0.01682	High	2.45069					2
	GNVAGDSKNDPPMEAAGFTAQVIILNHPGQISAGYAPVLDCHTAHIACK	2	1	1	P68104	C41(Carbamidomethyl); C48(Carbamidomethyl)	5113.48	0	0	0	0.003	0.03603	High	2.76298					1
P02647	Apolipoprotein A-I OS=Homo sapiens OX=9606 GN=APOA1 PE=1 SV=1 - [APOA1_HUMAN]	64.79	1	22	22	163	8.29323e+06	1.83691e+07	1.86185e+07	105.677	60.67	20	41	186.222	64.04	20	63	179.397	57.3	17	59	267	30.7589	5.75732
	Sequence	# PSMs	# Proteins	# Protein Groups	Protein Group Accessions	Modifications	MH+ [Da]	A5: Area	B5: Area	C5: Area	q-Value	PEP	A2	XCorr A2	B2	XCorr B2	C2	XCorr C2	# Missed Cleavages
	DSGRDYVSQFEGSALGK	7	1	1	P02647		1815.85	740616	6.08084e+06	6.49587e+06	0	2.706e-09	High	4.93809	High	4.74821	High	5.89502	1
	VSFLSALEEYTK	18	1	1	P02647		1386.72	6.8895e+06	1.32167e+07	1.32848e+07	0	9.808e-08	High	4.91474	High	4.7693	High	4.67362	0
	DYVSQFEGSALGK	7	1	1	P02647		1400.67	2.25111e+06	4.0221e+06	4.21647e+06	0	3.423e-07	High	4.75097	High	4.57988	High	4.58151	0
	LLDNWDSVTSTFSK	14	1	1	P02647		1612.79	9.38112e+06	2.457e+07	2.46602e+07	0	2.107e-07	High	4.50874	High	4.7476	High	4.51674	0
	VKDLATVYVDVLK	4	1	1	P02647		1462.85	758194	1.22949e+06	1.1713e+06	0	0.001508	High	4.25285	High	3.54583	High	3.36933	1
	LREQLGPVTQEFWDNLEK	3	1	1	P02647		2202.12	384756	697174	782445	0	1.349e-05	High	3.558	High	3.44709	High	2.44263	1
	DLATVYVDVLK	3	1	1	P02647		1235.69	222568	706238	647060	0	3.68e-05	High	3.00087	High	2.84899	High	2.94022	0
	VEPLRAELQEGAR	4	1	1	P02647		1467.79	365594	2.40902e+06	359342	0	0.0002302	High	2.89585	High	3.37601	High	3.25228	1
	WQEEMELYR	5	1	1	P02647		1283.58	2.66491e+06	5.84159e+06	6.30017e+06	0	0.0001129	High	2.65653	High	3.50549	High	3.36191	0
	VKDLATVYVDVLKDSGR	3	1	1	P02647		1878.04	378369	730692	0	0	0.0002326	High	2.60984	High	3.18738			2
	ATEHLSTLSEK	44	1	1	P02647		1215.62	0	1.71413e+06	4.03293e+06	0	1.075e-05	High	2.6035	High	3.28107	High	3.59934	0
	VQPYLDDFQKK	4	1	1	P02647		1380.72	1.42117e+06	8.69172e+06	2.09912e+06	0	0.005273	High	2.56765	High	1.58157	High	3.28395	1
	THLAPYSDELRQR	5	1	1	P02647		1585.81	750780	3.30941e+06	3.72341e+06	0	0.000299	High	2.56727	High	2.97448	High	2.85334	1
	QGLLPVLESFK	9	1	1	P02647		1230.71	8.60908e+06	1.73205e+07	1.79105e+07	0	4.297e-06	High	2.19404	High	3.02704	High	2.90819	0
	LSPLGEEMR	2	1	1	P02647		1031.52	1.12296e+06	1.81593e+06	0	0	0.003569	High	2.16264	High	2.83032			0
	DLATVYVDVLKDSGR	3	1	1	P02647		1650.88	147852	76168.4	350476	0	0.0002707	High	2.13747	High	2.48688	High	1.9639	1
	THLAPYSDELR	4	1	1	P02647		1301.65	0	0	2.75839e+06	0	4.254e-05	High	2.06983	High	3.31723	High	3.70239	0
	WQEEMELYR	2	1	1	P02647	M5(Oxidation)	1299.57	0	1.24548e+06	1.16499e+06	0	0.000127			High	3.50197	High	3.30197	0
	LEALKENGGAR	16	1	1	P02647		1157.63	0	1.16409e+06	0	0	0.0001113			High	3.21269	High	3.21102	1
	DLATVYVDVLKDSGRDYVSQFEGSALGK	1	1	1	P02647		3032.52	401941	0	0	0.001	0.01301	High	1.77851					2
	AKPALEDLRQGLLPVLESFK	2	1	1	P02647		2224.27	0	666337	0	0.001	0.009988	High	1.55923	High	0.908924			1
	VQPYLDDFQK	2	1	1	P02647		1252.62	0	1.77898e+06	1.95324e+06	0.001	0.01564			High	2.4449	High	2.07806	0
	QKVEPLRAELQEGAR	1	1	1	P02647		1723.95	2.47108e+06	0	0	0.008	0.09389	High	2.1755					2
P30086	Phosphatidylethanolamine-binding protein 1 OS=Homo sapiens OX=9606 GN=PEBP1 PE=1 SV=3 - [PEBP1_HUMAN]	64.71	1	6	6	22	1.03161e+06	2.13748e+06	2.19045e+06	27.811	57.22	5	8	26.1922	44.92	4	7	25.8231	44.92	4	7	187	21.0437	7.53271
	Sequence	# PSMs	# Proteins	# Protein Groups	Protein Group Accessions	Modifications	MH+ [Da]	A5: Area	B5: Area	C5: Area	q-Value	PEP	A2	XCorr A2	B2	XCorr B2	C2	XCorr C2	# Missed Cleavages
	GNDISSGTVLSDYVGSGPPK	5	1	1	P30086		1949.95	385954	1.28649e+06	1.44174e+06	0	1.207e-12	High	5.16535	High	6.1328	High	4.90738	0
	WSGPLSLQEVDEQPQHPLHVTYAGAAVDELGK	7	1	1	P30086		3471.72	1.98864e+06	4.44815e+06	4.44595e+06	0	9.513e-08	High	4.76945	High	3.53494	High	3.06729	0
	APVAGTCYQAEWDDYVPK	5	1	1	P30086	C7(Carbamidomethyl)	2069.93	200110	677819	683662	0	5.788e-10	High	3.92629	High	4.58315	High	5.2154	0
	YVWLVYEQDRPLKCDEPILSNR	2	1	1	P30086	C14(Carbamidomethyl)	2793.41	720244	0	0	0	0.0001112	High	3.29016					1
	NRPTSISWDGLDSGK	1	1	1	P30086		1632.8	110789	0	0	0	0.004628	High	2.78836					0
	LYTLVLTDPDAPSR	2	1	1	P30086		1560.83	0	341991	395484	0	0.0003068			High	2.93345	High	3.81513	0
P07437	Tubulin beta chain OS=Homo sapiens OX=9606 GN=TUBB PE=1 SV=2 - [TBB5_HUMAN]	64.19	1	2	25	229	1.02516e+07	1.88786e+07	1.93645e+07	263.852	64.19	25	79	228.705	64.19	25	74	233.53	64.19	24	76	444	49.639	4.89404
	Sequence	# PSMs	# Proteins	# Protein Groups	Protein Group Accessions	Modifications	MH+ [Da]	A5: Area	B5: Area	C5: Area	q-Value	PEP	A2	XCorr A2	B2	XCorr B2	C2	XCorr C2	# Missed Cleavages
	SGPFGQIFRPDNFVFGQSGAGNNWAK	21	4	4	Q9BVA1;P68371;P07437;P04350		2798.34	1.05933e+07	1.42912e+07	1.48109e+07	0	2.084e-15	High	7.58611	High	5.01153	High	4.85653	0
	MREIVHIQAGQCGNQIGAK	8	4	4	Q9BVA1;P07437;P68371;P04350	C12(Carbamidomethyl)	2110.07	2.37176e+06	9.17256e+06	9.71329e+06	0	1.151e-10	High	6.17544	High	4.28173	High	4.93801	1
	GHYTEGAELVDSVLDVVRK	9	3	3	Q9BVA1;P68371;P07437		2087.08	4.32543e+06	5.65183e+06	6.18896e+06	0	4.069e-10	High	5.87441	High	4.73166	High	4.75559	1
	GHYTEGAELVDSVLDVVR	6	3	3	Q9BVA1;P68371;P07437		1958.99	1.61644e+06	3.58853e+06	4.14285e+06	0	2.109e-09	High	5.17333	High	3.95393	High	3.377	0
	MSMKEVDEQMLNVQNK	6	3	3	Q9BVA1;P68371;P07437		1923.9	1.79783e+06	5.29845e+06	5.03962e+06	0	1.244e-08	High	5.01705	High	4.12516	High	4.5277	1
	EIVHIQAGQCGNQIGAK	6	4	4	P68371;P07437;P04350;Q9BVA1	C10(Carbamidomethyl)	1822.92	1.71808e+06	5.73166e+06	6158390	0	4.368e-09	High	4.85775	High	5.19976	High	5.25354	0
	LTTPTYGDLNHLVSATMSGVTTCLR	14	4	4	P04350;P68371;P07437;Q9BVA1	C23(Carbamidomethyl)	2708.34	2.23751e+06	9.27311e+06	9.73205e+06	0	5.001e-07	High	4.42837	High	4.60373	High	4.20104	0
	KEAESCDCLQGFQLTHSLGGGTGSGMGTLLISK	3	4	3	P04350;P68371;P07437	C6(Carbamidomethyl); C8(Carbamidomethyl)	3439.63	1.34015e+06	3.20996e+06	0	0	6.929e-07	High	4.29635	High	1.89546			1
	EVDEQMLNVQNK	9	3	3	P68371;P07437;Q9BVA1		1446.69	2.01071e+06	5.88533e+06	6.23756e+06	0	1.926e-07	High	4.28237	High	4.8307	High	4.81295	0
	NSSYFVEWIPNNVK	14	4	4	P04350;P68371;P07437;Q9BVA1		1696.84	7.131e+06	1.76014e+07	1.87542e+07	0	2.671e-07	High	4.25883	High	4.49079	High	4.28865	0
	IMNTFSVVPSPK	12	3	3	P04350;P68371;P07437		1319.7	1.01262e+07	2.37543e+07	2.38931e+07	0	6.081e-07	High	4.24414	High	4.64625	High	4.46755	0
	MREIVHIQAGQCGNQIGAK	5	4	4	P07437;P04350;P68371;Q9BVA1	M1(Oxidation); C12(Carbamidomethyl)	2126.06	459443	331864	1.81041e+06	0	2.792e-06	High	4.06018	High	4.72702	High	3.0305	1
	LAVNMVPFPR	10	5	4	P04350;P68371;P07437;Q9BVA1		1143.64	7.82768e+06	1.52801e+07	1.54462e+07	0	1.902e-06	High	4.00007	High	4.02392	High	4.01098	0
	LHFFMPGFAPLTSR	15	5	4	P04350;P68371;P07437;Q9BVA1		1620.84	1.00354e+07	1.22471e+07	1.3259e+07	0	2.706e-07	High	3.97912	High	4.29786	High	3.70118	0
	ISEQFTAMFR	7	4	4	P68371;P07437;P04350;Q9BVA1		1229.6	2.58727e+06	4730457	4.51982e+06	0	1.742e-06	High	3.93011	High	4.07875	High	4.17069	0
	LHFFMPGFAPLTSR	3	5	4	P04350;P68371;P07437;Q9BVA1	M5(Oxidation)	1636.83	527699	1.4488e+06	1.55992e+06	0	4.653e-06	High	3.78859	High	3.83328	High	3.15064	0
	AILVDLEPGTMDSVR	6	2	2	Q9BVA1;P07437		1615.84	1.97892e+06	1.46922e+06	1.37573e+06	0	3.278e-06	High	3.74546	High	3.6101	High	3.65087	0
	KLAVNMVPFPR	5	5	4	P68371;P07437;P04350;Q9BVA1		1271.73	946917	815151	907395	0	2.361e-06	High	3.61524	High	3.95821	High	4.00744	1
	YLTVAAVFR	3	3	3	P04350;P68371;P07437		1039.6	2.6285e+06	4.45129e+06	4.61691e+06	0	2.496e-05	High	3.11029	High	3.4356	High	3.38904	0
	ISVYYNEATGGK	5	1	1	P07437		1301.64	350515	807812	1.09021e+06	0	1.676e-05	High	3.08636	High	3.33454	High	3.29052	0
	EAESCDCLQGFQLTHSLGGGTGSGMGTLLISK	12	4	3	P04350;P68371;P07437	C5(Carbamidomethyl); C7(Carbamidomethyl)	3311.54	2.63127e+06	6.3304e+06	6.22601e+06	0	2.376e-05	High	3.0503	High	4.34609	High	4.25393	0
	FPGQLNADLR	15	5	4	P04350;P68371;P07437;Q9BVA1		1130.6	794914	2.98707e+06	3.49805e+06	0	0.000241	High	2.93425	High	3.27992	High	3.13511	0
	NMMAACDPR	6	5	4	P04350;P68371;P07437;Q9BVA1	C6(Carbamidomethyl)	1065.43	756349	695361	1.64701e+06	0	0.001022	High	2.83547	High	3.01498	High	2.93429	0
	ISEQFTAMFR	3	4	4	P68371;P07437;P04350;Q9BVA1	M8(Oxidation)	1245.6	192067	522730	649840	0	5.147e-06	High	2.6777	High	3.29084	High	3.80689	0
	FPGQLNADLRK	8	5	4	P68371;P07437;P04350;Q9BVA1		1258.69	1.1516e+06	2.83783e+06	0	0	0.005798	High	2.67016	High	2.42751	High	2.4463	1
	TAVCDIPPR	4	5	4	P68371;P07437;P04350;Q9BVA1	C4(Carbamidomethyl)	1028.52	0	0	0	0	0.001449	High	2.28413	High	2.83446	High	3.10384	0
	ALTVPELTQQVFDAK	4	1	1	P07437		1659.9	799411	1.70283e+06	1.80525e+06	0	4.569e-05	High	2.25291	High	2.69717	High	2.48902	0
	EVDEQMLNVQNK	3	2	2	P68371;P07437	M6(Oxidation)	1462.69	0	190015	247500	0	0.002812			High	3.39207	High	3.71107	0
	IMNTFSVVPSPK	2	3	3	P04350;P68371;P07437	M2(Oxidation)	1335.7	0	540417	0	0	0.0004341			High	2.93335			0
	IREEYPDRIMNTFSVVPSPK	4	2	2	P68371;P07437		2378.22	1.10013e+06	3.43385e+06	3.60272e+06	0.001	0.01851	High	2.76047	High	2.12049	High	2.21002	2
	EAESCDCLQGFQLTHSLGGGTGSGMGTLLISK	1	3	2	P68371;P07437	C5(Carbamidomethyl); C7(Carbamidomethyl); M25(Oxidation)	3327.54	0	0	340275	0.006	0.07053					High	2.15886	0
P04350	Tubulin beta-4A chain OS=Homo sapiens OX=9606 GN=TUBB4A PE=1 SV=2 - [TBB4A_HUMAN]	63.96	2	3	23	230	1.20917e+07	2.42922e+07	2.45064e+07		0			243.661	63.96	23	80		0			444	49.5539	4.88135
	Sequence	# PSMs	# Proteins	# Protein Groups	Protein Group Accessions	Modifications	MH+ [Da]	A5: Area	B5: Area	C5: Area	q-Value	PEP	A2	XCorr A2	B2	XCorr B2	C2	XCorr C2	# Missed Cleavages
	SGPFGQIFRPDNFVFGQSGAGNNWAK	21	4	4	Q9BVA1;P68371;P07437;P04350		2798.34	1.05933e+07	1.42912e+07	1.48109e+07	0	2.084e-15	High	7.58611	High	5.01153	High	4.85653	0
	MREIVHLQAGQCGNQIGAK	8	4	4	Q9BVA1;P07437;P68371;P04350	C12(Carbamidomethyl)	2110.07	2.37176e+06	9.17256e+06	9.71329e+06	0	1.151e-10	High	6.17544	High	4.28173	High	4.93801	1
	FWEVISDEHGIDPTGTYHGDSDLQLER	5	2	2	P68371;P04350		3116.42	7.44797e+06	1.46644e+07	1.37251e+07	0	1.45e-09	High	5.89579	High	2.08926	High	2.51513	0
	EIVHLQAGQCGNQIGAK	6	4	4	P68371;P07437;P04350;Q9BVA1	C10(Carbamidomethyl)	1822.92	1.71808e+06	5.73166e+06	6158390	0	4.368e-09	High	4.85775	High	5.19976	High	5.25354	0
	ALTVPELTQQMFDAK	28	2	2	P68371;P04350		1691.87	1.2827e+07	2.47714e+07	2.50373e+07	0	1.302e-11	High	4.81131	High	4.25202	High	4.41604	0
	LTTPTYGDLNHLVSATMSGVTTCLR	14	4	4	P04350;P68371;P07437;Q9BVA1	C23(Carbamidomethyl)	2708.34	2.23751e+06	9.27311e+06	9.73205e+06	0	5.001e-07	High	4.42837	High	4.60373	High	4.20104	0
	KEAESCDCLQGFQLTHSLGGGTGSGMGTLLISK	3	4	3	P04350;P68371;P07437	C6(Carbamidomethyl); C8(Carbamidomethyl)	3439.63	1.34015e+06	3.20996e+06	0	0	6.929e-07	High	4.29635	High	1.89546			1
	NSSYFVEWIPNNVK	14	4	4	P04350;P68371;P07437;Q9BVA1		1696.84	7.131e+06	1.76014e+07	1.87542e+07	0	2.671e-07	High	4.25883	High	4.49079	High	4.28865	0
	IMNTFSVVPSPK	12	3	3	P04350;P68371;P07437		1319.7	1.01262e+07	2.37543e+07	2.38931e+07	0	6.081e-07	High	4.24414	High	4.64625	High	4.46755	0
	MREIVHLQAGQCGNQIGAK	5	4	4	P07437;P04350;P68371;Q9BVA1	M1(Oxidation); C12(Carbamidomethyl)	2126.06	459443	331864	1.81041e+06	0	2.792e-06	High	4.06018	High	4.72702	High	3.0305	1
	LAVNMVPFPR	10	5	4	P04350;P68371;P07437;Q9BVA1		1143.64	7.82768e+06	1.52801e+07	1.54462e+07	0	1.902e-06	High	4.00007	High	4.02392	High	4.01098	0
	LHFFMPGFAPLTSR	15	5	4	P04350;P68371;P07437;Q9BVA1		1620.84	1.00354e+07	1.22471e+07	1.3259e+07	0	2.706e-07	High	3.97912	High	4.29786	High	3.70118	0
	ISEQFTAMFR	7	4	4	P68371;P07437;P04350;Q9BVA1		1229.6	2.58727e+06	4730457	4.51982e+06	0	1.742e-06	High	3.93011	High	4.07875	High	4.17069	0
	LHFFMPGFAPLTSR	3	5	4	P04350;P68371;P07437;Q9BVA1	M5(Oxidation)	1636.83	527699	1.4488e+06	1.55992e+06	0	4.653e-06	High	3.78859	High	3.83328	High	3.15064	0
	AVLVDLEPGTMDSVR	9	3	2	P04350;P68371		1601.82	1.28547e+07	2.4351e+07	2.45887e+07	0	3.635e-09	High	3.74283	High	3.93249	High	3.85545	0
	KLAVNMVPFPR	5	5	4	P68371;P07437;P04350;Q9BVA1		1271.73	946917	815151	907395	0	2.361e-06	High	3.61524	High	3.95821	High	4.00744	1
	YLTVAAVFR	3	3	3	P04350;P68371;P07437		1039.6	2.6285e+06	4.45129e+06	4.61691e+06	0	2.496e-05	High	3.11029	High	3.4356	High	3.38904	0
	EAESCDCLQGFQLTHSLGGGTGSGMGTLLISK	12	4	3	P04350;P68371;P07437	C5(Carbamidomethyl); C7(Carbamidomethyl)	3311.54	2.63127e+06	6.3304e+06	6.22601e+06	0	2.376e-05	High	3.0503	High	4.34609	High	4.25393	0
	AVLVDLEPGTMDSVR	3	3	2	P68371;P04350	M11(Oxidation)	1617.82	715486	2.22414e+06	2.19573e+06	0	2.418e-06	High	3.03086	High	2.84748	High	3.66691	0
	FPGQLNADLR	15	5	4	P04350;P68371;P07437;Q9BVA1		1130.6	794914	2.98707e+06	3.49805e+06	0	0.000241	High	2.93425	High	3.27992	High	3.13511	0
	NMMAACDPR	6	5	4	P04350;P68371;P07437;Q9BVA1	C6(Carbamidomethyl)	1065.43	756349	695361	1.64701e+06	0	0.001022	High	2.83547	High	3.01498	High	2.93429	0
	ISEQFTAMFR	3	4	4	P68371;P07437;P04350;Q9BVA1	M8(Oxidation)	1245.6	192067	522730	649840	0	5.147e-06	High	2.6777	High	3.29084	High	3.80689	0
	FPGQLNADLRK	8	5	4	P68371;P07437;P04350;Q9BVA1		1258.69	1.1516e+06	2.83783e+06	0	0	0.005798	High	2.67016	High	2.42751	High	2.4463	1
	TAVCDIPPR	4	5	4	P68371;P07437;P04350;Q9BVA1	C4(Carbamidomethyl)	1028.52	0	0	0	0	0.001449	High	2.28413	High	2.83446	High	3.10384	0
	MAATFIGNSTAIQELFK	1	1	1	P04350	M1(Oxidation)	1857.95	0	2.46052e+06	0	0	3.464e-07			High	4.34586			0
	MAATFIGNSTAIQELFKR	2	1	1	P04350	M1(Oxidation)	2014.04	0	1.18998e+07	0	0	3.578e-05			High	3.41946			1
	ALTVPELTQQMFDAK	4	2	2	P04350;P68371	M11(Oxidation)	1707.87	0	924213	987628	0	0.0003692			High	3.41619	High	2.75527	0
	IMNTFSVVPSPK	2	3	3	P04350;P68371;P07437	M2(Oxidation)	1335.7	0	540417	0	0	0.0004341			High	2.93335			0
	IREEFPDRIMNTFSVVPSPK	1	1	1	P04350	M10(Oxidation)	2378.22	0	3.43385e+06	0	0.006	0.06996			High	2.30745			2
	EAESCDCLQGFQLTHSLGGGTGSGMGTLLISK	1	3	2	P68371;P07437	C5(Carbamidomethyl); C7(Carbamidomethyl); M25(Oxidation)	3327.54	0	0	340275	0.006	0.07053					High	2.15886	0
P62937	Peptidyl-prolyl cis-trans isomerase A OS=Homo sapiens OX=9606 GN=PPIA PE=1 SV=2 - [PPIA_HUMAN]	63.64	1	9	9	55	3.56262e+06	9.41298e+06	9.48644e+06	61.7358	55.15	8	18	65.4291	63.64	8	19	65.2953	63.64	8	18	165	18.0009	7.81104
	Sequence	# PSMs	# Proteins	# Protein Groups	Protein Group Accessions	Modifications	MH+ [Da]	A5: Area	B5: Area	C5: Area	q-Value	PEP	A2	XCorr A2	B2	XCorr B2	C2	XCorr C2	# Missed Cleavages
	HTGPGILSMANAGPNTNGSQFFICTAK	9	1	1	P62937	C24(Carbamidomethyl)	2791.33	2.5493e+06	5.53258e+06	5.61803e+06	0	1.483e-11	High	7.20587	High	5.47376	High	5.05941	0
	HTGPGILSMANAGPNTNGSQFFICTAK	3	1	1	P62937	M9(Oxidation); C24(Carbamidomethyl)	2807.34	223341	705676	737757	0	2.815e-06	High	5.01088	High	4.32116	High	4.72651	0
	SIYGEKFEDENFILK	6	1	1	P62937		1831.92	3.35349e+06	9.90085e+06	9.4214e+06	0	5.201e-08	High	4.94829	High	5.28215	High	5.66317	1
	VKEGMNIVEAMER	7	1	1	P62937		1505.75	2.10863e+06	6.91922e+06	7.02691e+06	0	6.431e-07	High	4.34081	High	4.73818	High	4.65276	1
	KITIADCGQLE	6	1	1	P62937	C7(Carbamidomethyl)	1247.63	1.53699e+06	4.87519e+06	5.33223e+06	0	2.765e-05	High	4.05173	High	4.05566	High	3.90269	1
	VSFELFADKVPK	9	1	1	P62937		1379.76	4.78506e+06	8.12557e+06	8.36513e+06	0	0.0001837	High	3.55883	High	3.36679	High	3.64785	1
	EGMNIVEAMER	1	1	1	P62937		1278.58	909567	0	0	0	0.0004927	High	3.08141					0
	FEDENFILK	3	1	1	P62937		1154.57	808300	2.5801e+06	2.40205e+06	0	0.001554	High	2.69565	High	2.96756	High	3.12485	0
	TEWLDGKHVVFGK	6	1	1	P62937		1515.8	450291	2.28359e+06	2.41988e+06	0	0.002739	High	2.16342	High	2.49056	High	2.60234	1
	IIPGFMCQGGDFTR	4	1	1	P62937	C7(Carbamidomethyl)	1598.75	0	1.02125e+07	1.06728e+07	0	1.137e-08			High	3.64043	High	3.61578	0
	VKEGMNIVEAMER	1	1	1	P62937	M5(Oxidation)	1521.74	0	64264.7	0	0.001	0.006839			High	3.04404			1
Q13938	Calcyphosin OS=Homo sapiens OX=9606 GN=CAPS PE=1 SV=1 - [CAYP1_HUMAN]	63.49	1	18	18	364	4.59415e+07	1.02536e+08	1.1068e+08	388.244	63.49	18	143	357.267	63.49	18	114	349.943	63.49	17	107	189	20.9543	4.89404
	Sequence	# PSMs	# Proteins	# Protein Groups	Protein Group Accessions	Modifications	MH+ [Da]	A5: Area	B5: Area	C5: Area	q-Value	PEP	A2	XCorr A2	B2	XCorr B2	C2	XCorr C2	# Missed Cleavages
	LGLVLDQAEAEGVCR	16	1	1	Q13938	C14(Carbamidomethyl)	1629.83	6.14548e+06	2.07603e+07	2.17155e+07	0	5.433e-08	High	5.26227	High	5.19858	High	5.01733	0
	WDRNGSGTLDLEEFLR	6	1	1	Q13938		1907.93	2.83024e+06	5.4743e+06	5.71354e+06	0	7.799e-08	High	4.90977	High	3.59415	High	3.65995	1
	LDRSGDGVVTVDDLR	13	1	1	Q13938		1616.83	6.66215e+06	2.01443e+07	2.17402e+07	0	2.2e-08	High	4.70797	High	3.35572	High	3.77304	1
	NGSGTLDLEEFLR	56	1	1	Q13938		1450.72	4.28968e+07	7.88544e+07	8.04953e+07	0	4.014e-08	High	4.69083	High	4.75384	High	4.7484	0
	SLDADEFRQGLAK	11	1	1	Q13938		1449.74	9.38641e+06	2.53082e+07	2.83874e+07	0	1.147e-05	High	4.31796	High	4.62125	High	4.90611	1
	SGEWTEDEVLR	11	1	1	Q13938		1320.61	1.04346e+07	2.83691e+07	2.95538e+07	0	9.479e-06	High	3.82228	High	4.37072	High	4.16044	0
	VRSGEWTEDEVLR	5	1	1	Q13938		1575.78	560149	1.76654e+06	1.83756e+06	0	0.0001412	High	3.82015	High	3.76266	High	3.88917	1
	SGDGVVTVDDLRGVYSGR	8	1	1	Q13938		1851.92	1.99014e+06	6.86762e+06	7.97746e+06	0	4.696e-05	High	3.75467	High	3.34684	High	3.80923	1
	GASGIQGLAR	38	1	1	Q13938		929.517	0	5.226e+06	0	0	7.343e-05	High	3.71618	High	3.8117	High	3.8482	0
	SGDGVVTVDDLR	21	1	1	Q13938		1232.61	4.74496e+07	1.42347e+08	1.51763e+08	0	3.411e-05	High	3.68299	High	3.57502	High	3.63713	0
	EAVIAAAFAK	34	1	1	Q13938		990.563	4.74781e+07	8.3915e+07	9.41196e+07	0	0.0001165	High	3.56948	High	3.07916	High	3.17239	0
	FLDNFDSSEK	11	1	1	Q13938		1201.54	6.75605e+06	1.51485e+07	1.673e+07	0	0.0001149	High	3.5148	High	3.56944	High	3.59935	0
	VRSGEWTEDEVLRR	4	1	1	Q13938		1731.88	1.8541e+06	4.68167e+06	5.08717e+06	0	3.028e-05	High	3.39593	High	4.77929	High	4.07018	2
	RFLDNFDSSEK	5	1	1	Q13938		1357.64	1.00512e+06	1.79243e+06	1.9281e+06	0	6.712e-05	High	3.22039	High	3.71616	High	4.40637	1
	SGEWTEDEVLRR	17	1	1	Q13938		1476.71	2.47893e+07	8.13473e+07	8.61563e+07	0	0.0004356	High	3.16663	High	3.33011	High	3.28863	1
	ALRPPMSQAR	81	1	1	Q13938		1126.62	2.49574e+07	2.10137e+07	2.91675e+07	0	0.0001079	High	3.14402	High	3.38439	High	3.60477	0
	LDRSGDGVVTVDDLRGVYSGR	3	1	1	Q13938		2236.14	504517	2.24207e+06	0	0	0.003734	High	3.09185	High	3.44642			2
	LGLVLDQAEAEGVCRK	3	1	1	Q13938	C14(Carbamidomethyl)	1757.92	1.87132e+06	7.28149e+06	7.4744e+06	0	0.0005615	High	2.27581	High	3.12948	High	2.44713	1
	ALRPPMSQAR	21	1	1	Q13938	M6(Oxidation)	1142.61	0	0	5.27998e+06	0	3.6e-05	High	2.1693	High	2.67717	High	2.83779	0
Q9BVA1	Tubulin beta-2B chain OS=Homo sapiens OX=9606 GN=TUBB2B PE=1 SV=1 - [TBB2B_HUMAN]	62.7	1	5	24	199	9.48547e+06	1.57242e+07	1.63371e+07	247.972	62.7	23	74		0				0			445	49.9209	4.89404
	Sequence	# PSMs	# Proteins	# Protein Groups	Protein Group Accessions	Modifications	MH+ [Da]	A5: Area	B5: Area	C5: Area	q-Value	PEP	A2	XCorr A2	B2	XCorr B2	C2	XCorr C2	# Missed Cleavages
	SGPFGQIFRPDNFVFGQSGAGNNWAK	21	4	4	Q9BVA1;P68371;P07437;P04350		2798.34	1.05933e+07	1.42912e+07	1.48109e+07	0	2.084e-15	High	7.58611	High	5.01153	High	4.85653	0
	MREIVHIQAGQCGNQIGAK	8	4	4	Q9BVA1;P07437;P68371;P04350	C12(Carbamidomethyl)	2110.07	2.37176e+06	9.17256e+06	9.71329e+06	0	1.151e-10	High	6.17544	High	4.28173	High	4.93801	1
	GHYTEGAELVDSVLDVVRK	9	3	3	Q9BVA1;P68371;P07437		2087.08	4.32543e+06	5.65183e+06	6.18896e+06	0	4.069e-10	High	5.87441	High	4.73166	High	4.75559	1
	GHYTEGAELVDSVLDVVR	6	3	3	Q9BVA1;P68371;P07437		1958.99	1.61644e+06	3.58853e+06	4.14285e+06	0	2.109e-09	High	5.17333	High	3.95393	High	3.377	0
	MSMKEVDEQMLNVQNK	6	3	3	Q9BVA1;P68371;P07437		1923.9	1.79783e+06	5.29845e+06	5.03962e+06	0	1.244e-08	High	5.01705	High	4.12516	High	4.5277	1
	EIVHIQAGQCGNQIGAK	6	4	4	P68371;P07437;P04350;Q9BVA1	C10(Carbamidomethyl)	1822.92	1.71808e+06	5.73166e+06	6158390	0	4.368e-09	High	4.85775	High	5.19976	High	5.25354	0
	MSATFIGNSTAIQELFKR	8	2	2	Q9BVA1;P68371		2014.05	4.57727e+06	324581	1.18645e+07	0	7.019e-05	High	4.65952	High	2.70221	High	3.09063	1
	LTTPTYGDLNHLVSATMSGVTTCLR	14	4	4	P04350;P68371;P07437;Q9BVA1	C23(Carbamidomethyl)	2708.34	2.23751e+06	9.27311e+06	9.73205e+06	0	5.001e-07	High	4.42837	High	4.60373	High	4.20104	0
	EVDEQMLNVQNK	9	3	3	P68371;P07437;Q9BVA1		1446.69	2.01071e+06	5.88533e+06	6.23756e+06	0	1.926e-07	High	4.28237	High	4.8307	High	4.81295	0
	NSSYFVEWIPNNVK	14	4	4	P04350;P68371;P07437;Q9BVA1		1696.84	7.131e+06	1.76014e+07	1.87542e+07	0	2.671e-07	High	4.25883	High	4.49079	High	4.28865	0
	MREIVHIQAGQCGNQIGAK	5	4	4	P07437;P04350;P68371;Q9BVA1	M1(Oxidation); C12(Carbamidomethyl)	2126.06	459443	331864	1.81041e+06	0	2.792e-06	High	4.06018	High	4.72702	High	3.0305	1
	LAVNMVPFPR	10	5	4	P04350;P68371;P07437;Q9BVA1		1143.64	7.82768e+06	1.52801e+07	1.54462e+07	0	1.902e-06	High	4.00007	High	4.02392	High	4.01098	0
	LHFFMPGFAPLTSR	15	5	4	P04350;P68371;P07437;Q9BVA1		1620.84	1.00354e+07	1.22471e+07	1.3259e+07	0	2.706e-07	High	3.97912	High	4.29786	High	3.70118	0
	ISEQFTAMFR	7	4	4	P68371;P07437;P04350;Q9BVA1		1229.6	2.58727e+06	4730457	4.51982e+06	0	1.742e-06	High	3.93011	High	4.07875	High	4.17069	0
	LHFFMPGFAPLTSR	3	5	4	P04350;P68371;P07437;Q9BVA1	M5(Oxidation)	1636.83	527699	1.4488e+06	1.55992e+06	0	4.653e-06	High	3.78859	High	3.83328	High	3.15064	0
	AILVDLEPGTMDSVR	6	2	2	Q9BVA1;P07437		1615.84	1.97892e+06	1.46922e+06	1.37573e+06	0	3.278e-06	High	3.74546	High	3.6101	High	3.65087	0
	KLAVNMVPFPR	5	5	4	P68371;P07437;P04350;Q9BVA1		1271.73	946917	815151	907395	0	2.361e-06	High	3.61524	High	3.95821	High	4.00744	1
	IMNTFSVMPSPK	1	1	1	Q9BVA1		1351.67	540455	0	0	0	4.539e-05	High	3.49177					0
	FPGQLNADLR	15	5	4	P04350;P68371;P07437;Q9BVA1		1130.6	794914	2.98707e+06	3.49805e+06	0	0.000241	High	2.93425	High	3.27992	High	3.13511	0
	NMMAACDPR	6	5	4	P04350;P68371;P07437;Q9BVA1	C6(Carbamidomethyl)	1065.43	756349	695361	1.64701e+06	0	0.001022	High	2.83547	High	3.01498	High	2.93429	0
	ISEQFTAMFR	3	4	4	P68371;P07437;P04350;Q9BVA1	M8(Oxidation)	1245.6	192067	522730	649840	0	5.147e-06	High	2.6777	High	3.29084	High	3.80689	0
	FPGQLNADLRK	8	5	4	P68371;P07437;P04350;Q9BVA1		1258.69	1.1516e+06	2.83783e+06	0	0	0.005798	High	2.67016	High	2.42751	High	2.4463	1
	FWEVISDEHGIDPTGSYHGDSDLQLER	2	1	1	Q9BVA1		3102.41	374403	0	0	0	0.002459	High	2.6473					0
	YLTVAAIFR	1	1	1	Q9BVA1		1053.61	59497.7	0	0	0	0.0006236	High	2.51848					0
	TAVCDIPPR	4	5	4	P68371;P07437;P04350;Q9BVA1	C4(Carbamidomethyl)	1028.52	0	0	0	0	0.001449	High	2.28413	High	2.83446	High	3.10384	0
	EVDEQMLNVQNK	3	2	2	P68371;P07437	M6(Oxidation)	1462.69	0	190015	247500	0	0.002812			High	3.39207	High	3.71107	0
	MSATFIGNSTAIQELFKR	2	1	1	P68371	M1(Oxidation)	2030.04	0	2.20759e+06	1.93869e+06	0.001	0.009664			High	2.24983	High	3.37868	1
	MSATFIGNSTAIQELFK	1	2	2	P68371;Q9BVA1		1857.95	0	0	541672	0.001	0.01159					High	2.13497	0
	INVYYNEATGNKYVPR	1	1	1	Q9BVA1		1900.96	200242	0	0	0.003	0.04401	High	2.18194					1
Q9UD71	Protein phosphatase 1 regulatory subunit 1B OS=Homo sapiens OX=9606 GN=PPP1R1B PE=1 SV=2 - [PPR1B_HUMAN]	62.25	1	7	7	16	595091	1.33033e+06	1.41942e+06	23.4478	44.12	4	5	14.5304	47.06	5	5	17.6611	54.41	5	6	204	22.9489	4.52588
	Sequence	# PSMs	# Proteins	# Protein Groups	Protein Group Accessions	Modifications	MH+ [Da]	A5: Area	B5: Area	C5: Area	q-Value	PEP	A2	XCorr A2	B2	XCorr B2	C2	XCorr C2	# Missed Cleavages
	IAESHLQSISNLNENQASEEEDELGELR	4	1	1	Q9UD71		3154.48	884680	1.36822e+06	1.45279e+06	0	8.765e-11	High	6.33453	High	4.20458	High	3.15728	0
	LSEHSSPEEEASPHQR	2	1	1	Q9UD71		1819.82	268739	0	0	0	1.655e-08	High	5.07178					0
	SKRPNPCAYTPPSLK	3	1	1	Q9UD71	C7(Carbamidomethyl)	1715.89	623763	2.03199e+06	2.17932e+06	0	0.0001209	High	4.39126	High	3.35925	High	3.42113	1
	ELGYPREEDEEEEEDDEEEEEEEDSQAEVLK	3	1	1	Q9UD71		3756.52	276829	590790	626138	0	4.505e-07	High	3.81973	High	3.99056	High	3.20564	1
	EEDEEEEEDDEEEEEEEDSQAEVLK	1	1	1	Q9UD71		3041.14	0	525501	0	0	2.789e-05			High	2.97602			0
	IQFSVPAPPSQLDPR	1	1	1	Q9UD71		1651.88	0	0	451112	0	0.001458					High	2.55905	0
	TTCGQGLEGPWERPPPLDESER	2	1	1	Q9UD71	C3(Carbamidomethyl)	2511.16	0	482714	507226	0.002	0.02668			High	1.99884	High	2.21132	0
P60174	Triosephosphate isomerase OS=Homo sapiens OX=9606 GN=TPI1 PE=1 SV=3 - [TPIS_HUMAN]	62.24	1	14	14	87	4.78802e+06	9.88147e+06	1.03144e+07	103.672	57.69	13	34	96.5756	62.24	14	27	95.3418	57.34	12	26	286	30.7717	5.92236
	Sequence	# PSMs	# Proteins	# Protein Groups	Protein Group Accessions	Modifications	MH+ [Da]	A5: Area	B5: Area	C5: Area	q-Value	PEP	A2	XCorr A2	B2	XCorr B2	C2	XCorr C2	# Missed Cleavages
	VTNGAFTGEISPGMIK	5	1	1	P60174		1621.83	1.05769e+06	3.04758e+06	3.42327e+06	0	3.391e-08	High	5.05436	High	5.22715	High	4.88177	0
	HVFGESDELIGQK	7	1	1	P60174		1458.72	1.1477e+06	3.62886e+06	3743423	0	2.979e-08	High	4.7373	High	4.62391	High	4.71717	0
	SNVSDAVAQSTR	17	1	1	P60174		1234.6	1.16478e+06	1.75741e+06	2.88267e+06	0	8.148e-08	High	4.42539	High	4.73338	High	4.57622	0
	RHVFGESDELIGQK	3	1	1	P60174		1614.82	338924	1.52849e+06	1.72734e+06	0	3.164e-06	High	4.10053	High	4.21636	High	3.86575	1
	VVLAYEPVWAIGTGK	10	1	1	P60174		1602.89	9.87701e+06	1.74729e+07	1.81587e+07	0	2.687e-07	High	4.09472	High	3.84507	High	3.56482	0
	VPADTEVVCAPPTAYIDFAR	10	1	1	P60174	C9(Carbamidomethyl)	2192.08	3.14814e+06	8.54261e+06	9.04115e+06	0	2.377e-06	High	4.00353	High	4.03872	High	4.25886	0
	KQSLGELIGTLNAAK	5	1	1	P60174		1542.89	1.33892e+06	2.9175e+06	852413	0	2.073e-09	High	3.7917	High	4.98852	High	4.96067	1
	QSLGELIGTLNAAK	6	1	1	P60174		1414.79	1.26362e+06	2.10673e+06	2.4088e+06	0	2.675e-07	High	3.67452	High	3.78726	High	4.13908	0
	VAHALAEGLGVIACIGEK	5	1	1	P60174	C14(Carbamidomethyl)	1807.98	1.01325e+06	2.0883e+06	2.08262e+06	0	1.298e-05	High	3.34995	High	2.64106	High	2.55549	0
	DCGATWVVLGHSER	4	1	1	P60174	C2(Carbamidomethyl)	1586.74	429811	224651	273666	0	0.001413	High	3.31902	High	3.11089	High	2.53227	0
	ELASQPDVDGFLVGGASLKPEFVDIINAK	6	1	1	P60174		3029.59	972849	2.87368e+06	2.76308e+06	0	2.382e-07	High	3.18486	High	0.99683	High	1.93066	0
	VIADNVKDWSK	4	1	1	P60174		1274.68	850653	885554	952111	0	2.488e-05	High	2.9051	High	3.91299	High	3.23554	1
	ELASQPDVDGFLVGGASLKPEFVDIINAKQ	4	1	1	P60174		3157.64	1.1265e+06	2.72838e+06	0	0	4.861e-05	High	2.61328	High	1.76525			1
	TATPQQAQEVHEK	1	1	1	P60174		1466.72	0	940103	0	0	0.0002459			High	2.80212			0
P62805	Histone H4 OS=Homo sapiens OX=9606 GN=HIST1H4A PE=1 SV=2 - [H4_HUMAN]	62.14	1	14	14	227	4.40133e+07	8.82348e+07	9.65618e+07	165.137	62.14	12	64	230.934	62.14	14	83	232.844	62.14	14	80	103	11.3604	11.356
	Sequence	# PSMs	# Proteins	# Protein Groups	Protein Group Accessions	Modifications	MH+ [Da]	A5: Area	B5: Area	C5: Area	q-Value	PEP	A2	XCorr A2	B2	XCorr B2	C2	XCorr C2	# Missed Cleavages
	KTVTAMDVVYALKR	17	1	1	P62805		1594.9	3.64789e+06	9.72714e+06	1.10219e+07	0	3.063e-08	High	5.6074	High	4.77921	High	3.95699	2
	VFLENVIRDAVTYTEHAK	25	1	1	P62805		2105.1	5.60802e+06	1.39485e+07	1.39762e+07	0	4.143e-09	High	5.26811	High	4.72493	High	3.5254	1
	KTVTAMDVVYALK	7	1	1	P62805		1438.8	691626	1.61849e+06	1.55903e+06	0	7.969e-07	High	4.7112	High	3.52978	High	4.82358	1
	ISGLIYEETR	22	1	1	P62805		1180.62	2.87903e+07	7.3508e+07	8.36129e+07	0	2.049e-06	High	4.00811	High	3.87798	High	4.05785	0
	TVTAMDVVYALK	14	1	1	P62805		1310.7	1.07201e+07	1.97929e+07	2.11125e+07	0	1.656e-07	High	4.0009	High	4.28084	High	4.08979	0
	TVTAMDVVYALKR	31	1	1	P62805		1466.81	4.96072e+07	9.54038e+07	9.84598e+07	0	2.411e-06	High	3.95422	High	4.11381	High	4.33711	1
	ISGLIYEETRGVLK	11	1	1	P62805		1577.89	5.52215e+06	2.24506e+07	2.38929e+07	0	9.059e-07	High	3.7823	High	4.03385	High	4.32863	1
	DNIQGITKPAIR	33	1	1	P62805		1325.76	5.36425e+07	9.57927e+07	1.07613e+08	0	0.0001329	High	3.60493	High	3.7117	High	3.7073	0
	TVTAMDVVYALK	4	1	1	P62805	M5(Oxidation)	1326.7	723300	915112	967915	0	2.639e-05	High	3.52041	High	3.91442	High	3.44137	0
	RKTVTAMDVVYALK	3	1	1	P62805		1594.9	414708	930376	993698	0	4.342e-05	High	3.43736	High	3.35685	High	2.78258	2
	RISGLIYEETR	7	1	1	P62805		1336.73	2.33937e+06	2.77332e+06	3.0398e+06	0	0.0008749	High	3.11314	High	3.49274	High	3.43045	1
	TVTAMDVVYALKR	8	1	1	P62805	M5(Oxidation)	1482.8	753411	3.63153e+06	4.38247e+06	0	0.002035	High	2.0328	High	3.73349	High	3.57666	1
	DAVTYTEHAK	33	1	1	P62805		1134.54	0	0	6.65777e+06	0	9.788e-05			High	3.7093	High	3.78359	0
	RISGLIYEETRGVLK	2	1	1	P62805		1733.99	0	1.12681e+06	1.2026e+06	0	0.002453			High	2.96903	High	2.84933	2
	DNIQGITKPAIRR	7	1	1	P62805		1481.86	6.01343e+06	2.57456e+07	2.7724e+07	0.001	0.01527	High	1.98711	High	1.85598	High	2.65435	1
	VLRDNIQGITKPAIR	3	1	1	P62805		1694.01	92883.7	419064	468693	0.002	0.02029	High	2.98394	High	2.09992	High	2.10304	1
Q13228	Selenium-binding protein 1 OS=Homo sapiens OX=9606 GN=SELENBP1 PE=1 SV=2 - [SBP1_HUMAN]	61.44	1	22	22	62	1.99237e+06	3.44917e+06	4.24388e+06	72.5105	54.66	17	25	58.0862	31.99	13	18	65.5957	36.86	15	19	472	52.3576	6.3667
	Sequence	# PSMs	# Proteins	# Protein Groups	Protein Group Accessions	Modifications	MH+ [Da]	A5: Area	B5: Area	C5: Area	q-Value	PEP	A2	XCorr A2	B2	XCorr B2	C2	XCorr C2	# Missed Cleavages
	NTGTEAPDYLATVDVDPK	7	1	1	Q13228		1905.91	796285	2.69359e+06	2.80248e+06	0	1.715e-07	High	5.48294	High	4.15445	High	4.79677	0
	FLHNPDAAQGFVGCALSSTIQR	5	1	1	Q13228	C14(Carbamidomethyl)	2389.17	1.75413e+06	3.50426e+06	3.64355e+06	0	2.142e-10	High	5.32205	High	2.94789	High	4.25333	0
	GGFVLLDGETFEVK	2	1	1	Q13228		1510.78	573513	0	0	0	2.247e-05	High	4.75968			High	4.2112	0
	GGPVQVLEDEELKSQPEPLVVK	6	1	1	Q13228		2390.29	2.34991e+06	0	4.59805e+06	0	7.768e-07	High	4.75509			High	3.94176	1
	HNVMISTEWAAPNVLR	2	1	1	Q13228		1837.94	570301	0	0	0	5.761e-10	High	4.34867					0
	IYVVDVGSEPR	5	1	1	Q13228		1233.65	1.87307e+06	4.14965e+06	4.49004e+06	0	1.355e-06	High	3.65976	High	3.94208	High	3.65731	0
	EEIVYLPCIYR	3	1	1	Q13228	C8(Carbamidomethyl)	1454.74	1.01914e+06	2.24788e+06	2.34252e+06	0	7.011e-06	High	3.1939	High	3.37	High	3.29939	0
	GGPVQVLEDEELK	3	1	1	Q13228		1412.73	434765	826843	946817	0	4.744e-06	High	3.18486	High	4.26936	High	4.1357	0
	TKLVLPSLISSR	5	1	1	Q13228		1313.82	869839	1.48343e+06	1.53231e+06	0	0.000356	High	2.94794	High	2.03897	High	2.91192	1
	VAGGPQMIQLSLDGKR	1	1	1	Q13228		1669.91	169644	0	0	0	0.001061	High	2.83654					1
	LTGQLFLGGSIVK	3	1	1	Q13228		1332.79	1.05376e+06	1.62472e+06	1.48183e+06	0	2.421e-07	High	2.75235	High	4.61043	High	4.25229	0
	LNPNFLVDFGKEPLGPALAHELR	1	1	1	Q13228		2547.37	435585	0	0	0	0.0002272	High	2.11828					1
	SPQYCQVIHR	2	1	1	Q13228	C5(Carbamidomethyl)	1287.63	340714	0	1.54582e+06	0	0.0008396	High	2.01931			High	2.81659	0
	DGLIPLEIR	2	1	1	Q13228		1025.6	317514	0	502798	0	0.005341	High	1.70253			High	2.1907	0
	CGNCGPGYSTPLEAMKGPR	2	1	1	Q13228	C1(Carbamidomethyl); C4(Carbamidomethyl)	2051.91	0	1.06708e+06	1.14825e+06	0	4.012e-07			High	4.09106	High	2.61923	1
	CGNCGPGYSTPLEAMK	2	1	1	Q13228	C1(Carbamidomethyl); C4(Carbamidomethyl)	1741.74	0	265878	289714	0	6.912e-05			High	3.72342	High	3.55035	0
	FYKNEGGTWSVEK	2	1	1	Q13228		1544.74	0	1.11783e+06	1.05485e+06	0	6.575e-05			High	3.23082	High	3.3548	1
	LVLPSLISSR	3	1	1	Q13228		1084.67	0	1.88133e+06	1.79086e+06	0	0.0001643			High	2.46959	High	2.67249	0
	HEIVQTLSLKDGLIPLEIR	3	1	1	Q13228		2174.26	247872	295008	0	0.001	0.009628	High	2.13757	High	2.70732			1
	LPMPNLKDELHHSGWNTCSSCFGDSTK	1	1	1	Q13228	C18(Carbamidomethyl); C21(Carbamidomethyl)	3118.39	229724	0	0	0.004	0.05454	High	2.27216					1
	DGFNPADVEAGLYGSHLYVWDWQR	1	1	1	Q13228		2795.28	0	0	0	0.007	0.08737	High	1.52694					0
	HEIVQTLSLK	1	1	1	Q13228		1167.67	0	366364	0	0.008	0.0893			High	1.97868			0
P30101	Protein disulfide-isomerase A3 OS=Homo sapiens OX=9606 GN=PDIA3 PE=1 SV=4 - [PDIA3_HUMAN]	60.59	1	24	24	136	3.96841e+06	9.85375e+06	1.07354e+07	121.766	56.44	21	41	133.785	51.09	21	46	138.557	48.71	21	49	505	56.7468	6.354
	Sequence	# PSMs	# Proteins	# Protein Groups	Protein Group Accessions	Modifications	MH+ [Da]	A5: Area	B5: Area	C5: Area	q-Value	PEP	A2	XCorr A2	B2	XCorr B2	C2	XCorr C2	# Missed Cleavages
	FISDKDASIVGFFDDSFSEAHSEFLK	15	1	1	P30101		2938.38	3.37672e+06	7.14795e+06	7.00432e+06	0	8.943e-09	High	5.48904	High	3.78187	High	3.02663	1
	MDATANDVPSPYEVR	8	1	1	P30101		1664.76	3.03904e+06	8.42293e+06	9.03244e+06	0	2.679e-10	High	5.12641	High	5.24659	High	5.04669	0
	KTFSHELSDFGLESTAGEIPVVAIR	6	1	1	P30101		2703.4	1.53978e+06	4.17733e+06	4.57879e+06	0	3.106e-05	High	4.52719	High	2.35316	High	2.6591	1
	LSKDPNIVIAK	10	1	1	P30101		1197.72	3.50885e+06	9.55544e+06	1.07996e+07	0	7.283e-09	High	4.44409	High	3.47005	High	3.58729	1
	ELSDFISYLQR	4	1	1	P30101		1370.7	4.41014e+06	308716	217016	0	2.576e-06	High	4.06573	High	2.39955	High	1.99061	0
	FLQDYFDGNLKR	9	1	1	P30101		1515.76	3.34381e+06	1.15829e+07	1.23742e+07	0	4.18e-05	High	3.86129	High	3.98277	High	3.62747	1
	FLDAGHKLNFAVASR	4	1	1	P30101		1645.89	853597	1.8269e+06	1.86021e+06	0	2.774e-06	High	3.71849	High	1.8473	High	2.2088	1
	TFSHELSDFGLESTAGEIPVVAIR	6	1	1	P30101		2575.31	1.22909e+06	3.09029e+06	2.99337e+06	0	2.662e-05	High	3.45668	High	2.20067	High	2.6963	0
	YGVSGYPTLK	7	1	1	P30101		1084.57	2.26302e+06	6.70542e+06	5780211	0	1.462e-05	High	3.32253	High	3.51625	High	3.4482	0
	FIQENIFGICPHMTEDNKDLIQGK	5	1	1	P30101	C10(Carbamidomethyl)	2847.38	2.86004e+06	5.43458e+06	5.64252e+06	0	1.494e-05	High	3.31033	High	3.35538	High	2.24787	1
	GFPTIYFSPANKK	5	1	1	P30101		1469.78	1.11753e+06	1.37276e+06	1.48222e+06	0	0.0009014	High	3.2995	High	3.40187	High	3.496	1
	FVMQEEFSR	7	1	1	P30101		1172.54	3.98623e+06	7.34583e+06	7.75874e+06	0	0.0001214	High	3.02692	High	3.23153	High	3.30199	0
	GFPTIYFSPANK	6	1	1	P30101		1341.69	2.66456e+06	6.04855e+06	5.943e+06	0	7.96e-06	High	3.0089	High	3.81731	High	3.84774	0
	LAPEYEAAATR	11	1	1	P30101		1191.6	1.77919e+06	6.14163e+06	7.9139e+06	0	1.771e-06	High	2.76755	High	4.04712	High	3.9676	0
	IFRDGEEAGAYDGPR	7	1	1	P30101		1652.77	462986	6.82613e+06	7.47556e+06	0	1.746e-07	High	2.54389	High	4.65823	High	4.02834	1
	SEPIPESNDGPVK	4	1	1	P30101		1368.67	385944	1.05359e+06	1.37087e+06	0	0.00387	High	2.4224	High	2.51026	High	2.19396	0
	QAGPASVPLRTEEEFKK	2	1	1	P30101		1887	3.12422e+06	0	0	0	0.004508	High	2.36737					2
	FAHTNVESLVNEYDDNGEGIILFRPSHLTNK	1	1	1	P30101		3529.74	485082	0	0	0	0.0009427	High	2.05002					0
	VDCTANTNTCNKYGVSGYPTLK	5	1	1	P30101	C3(Carbamidomethyl); C10(Carbamidomethyl)	2463.13	157387	539165	627791	0	0.0001868	High	1.88514	High	3.01991	High	3.47465	1
	EATNPPVIQEEKPK	5	1	1	P30101		1579.84	425713	749455	802814	0	0.0004229	High	1.54412	High	2.9271	High	3.00128	0
	MDATANDVPSPYEVR	2	1	1	P30101	M1(Oxidation)	1680.75	0	422059	430198	0	4.147e-06			High	3.99652	High	3.72976	0
	FEDKTVAYTEQK	1	1	1	P30101		1458.71	0	0	0	0	0.0008228			High	2.75973			1
	DGEEAGAYDGPR	1	1	1	P30101		1236.52	0	0	457218	0	8.1e-05					High	3.43111	0
	LKGIVPLAK	2	1	1	P30101		938.641	0	616673	1.25476e+06	0.001	0.008065			High	2.9741	High	2.74321	1
	RLAPEYEAAATR	3	1	1	P30101		1347.7	97952.3	239081	249927	0.002	0.02945	High	1.87018	High	2.90563	High	2.88407	1
P04075	Fructose-bisphosphate aldolase A OS=Homo sapiens OX=9606 GN=ALDOA PE=1 SV=2 - [ALDOA_HUMAN]	60.44	1	17	19	123	6.12534e+06	1.51864e+07	1.67105e+07	120.716	50.55	16	37	138.666	58.24	16	41	149.338	58.52	18	45	364	39.3953	8.08936
	Sequence	# PSMs	# Proteins	# Protein Groups	Protein Group Accessions	Modifications	MH+ [Da]	A5: Area	B5: Area	C5: Area	q-Value	PEP	A2	XCorr A2	B2	XCorr B2	C2	XCorr C2	# Missed Cleavages
	GVVPLAGTNGETTTQGLDGLSER	8	1	1	P04075		2272.14	2.00877e+06	6.23389e+06	6.29671e+06	0	1.107e-10	High	5.91802	High	5.49097	High	5.09944	0
	VDKGVVPLAGTNGETTTQGLDGLSER	4	1	1	P04075		2614.34	1.05723e+06	2.95787e+06	3.5864e+06	0	9.388e-10	High	5.43939	High	4.75011	High	4.55952	1
	CPLLKPWALTFSYGR	3	1	1	P04075	C1(Carbamidomethyl)	1808.95	1.13348e+06	1.18286e+06	1.33076e+06	0	2.362e-07	High	5.03114	High	3.31296	High	3.90775	0
	IGEHTPSALAIMENANVLAR	11	1	1	P04075		2107.1	5.5282e+06	1.33343e+07	1.35939e+07	0	4.054e-08	High	4.79615	High	4.10428	High	4.2054	0
	GILAADESTGSIAK	5	1	1	P04075		1332.7	3.26325e+06	9.14088e+06	9.7656e+06	0	4.437e-06	High	4.7821	High	5.01088	High	4.81503	0
	YASICQQNGIVPIVEPEILPDGDHDLK	3	2	2	P04075;P09972	C5(Carbamidomethyl)	3020.51	554068	1.12602e+06	1.1227e+06	0	3.876e-07	High	4.78051	High	3.29093	High	3.87055	0
	GILAADESTGSIAKR	9	1	1	P04075		1488.8	4.17238e+06	1.32621e+07	1.4219e+07	0	5.099e-07	High	4.32656	High	5.4584	High	5.15016	1
	YASICQQNGIVPIVEPEILPDGDHDLKR	8	2	2	P04075;P09972	C5(Carbamidomethyl)	3176.61	6.19336e+06	1.53254e+07	1.74417e+07	0	3.404e-05	High	3.772	High	3.99008	High	3.71555	1
	FSHEEIAMATVTALRR	4	1	1	P04075		1831.95	830673	2.82617e+06	2.89595e+06	0	1.119e-05	High	3.5186	High	3.261	High	3.10598	1
	ALANSLACQGK	27	1	1	P04075	C8(Carbamidomethyl)	1132.58	1.84577e+06	2.15499e+06	4.69741e+06	0	0.001968	High	3.4756	High	4.11402	High	4.02694	0
	IVAPGKGILAADESTGSIAK	3	1	1	P04075		1898.06	648662	1.41002e+06	1.40276e+06	0	4.769e-08	High	3.30652	High	3.07222	High	3.2687	1
	ALSDHHIYLEGTLLKPNMVTPGHACTQK	7	1	1	P04075	C25(Carbamidomethyl)	3131.58	1.17917e+06	3840242	4.10049e+06	0	0.004693	High	3.17379	High	2.36418	High	3.30642	0
	FSHEEIAMATVTALR	2	1	1	P04075		1675.85	306351	0	871173	0	0.002023	High	3.13075			High	2.55362	0
	IVAPGKGILAADESTGSIAKR	5	1	1	P04075		2054.16	664058	2.95632e+06	687396	0	8.481e-06	High	3.0607	High	2.73663	High	4.00209	2
	ADDGRPFPQVIK	13	1	1	P04075		1342.71	6.65447e+06	1.68994e+07	1.84707e+07	0	3.872e-05	High	3.0209	High	3.4997	High	3.34629	0
	GGVVGIKVDKGVVPLAGTNGETTTQGLDGLSER	1	1	1	P04075		3224.72	240634	0	0	0	0.001168	High	2.90827					2
	YTPSGQAGAAASESLFVSNHAY	6	1	1	P04075		2228.03	0	2.21947e+06	2.10865e+06	0	1.263e-09			High	4.77504	High	5.10437	0
	LQSIGTENTEENR	2	1	1	P04075		1490.71	0	30425.8	0	0	0.001292			High	3.0596	High	2.13989	0
	LQSIGTENTEENRR	2	1	1	P04075		1646.81	0	0	5.82447e+06	0.003	0.03281					High	1.87024	1
P62258	14-3-3 protein epsilon OS=Homo sapiens OX=9606 GN=YWHAE PE=1 SV=1 - [1433E_HUMAN]	60	1	15	16	70	1.90315e+06	7.81227e+06	5.69575e+06	67.8597	54.9	12	27	61.6209	48.24	12	22	63.6035	43.53	12	21	255	29.1554	4.7417
	Sequence	# PSMs	# Proteins	# Protein Groups	Protein Group Accessions	Modifications	MH+ [Da]	A5: Area	B5: Area	C5: Area	q-Value	PEP	A2	XCorr A2	B2	XCorr B2	C2	XCorr C2	# Missed Cleavages
	LAEQAERYDEMVESMKK	8	1	1	P62258		2056.97	2.25107e+06	1.26317e+07	6.19135e+06	0	4.884e-08	High	5.02405	High	4.55124	High	4.91222	2
	LAEQAERYDEMVESMK	4	1	1	P62258		1928.88	968787	304682	295696	0	9.789e-07	High	4.94837	High	3.59111	High	2.9636	1
	AASDIAMTELPPTHPIR	15	1	1	P62258		1819.94	878994	3.54568e+06	3.50505e+06	0	4.079e-05	High	3.71407	High	3.14122	High	4.03488	0
	YLAEFATGNDRK	6	1	1	P62258		1384.69	1.04394e+06	5086173	5597878	0	0.002409	High	3.55726	High	3.9783	High	3.87777	1
	DSTLIMQLLR	3	6	6	P31946;P62258;Q04917;P27348;P63104;P61981		1189.66	296224	1.20553e+06	1.35039e+06	0	4.773e-06	High	3.5249	High	3.8671	High	3.8267	0
	EAAENSLVAYK	9	1	1	P62258		1194.6	1.75891e+06	4.3774e+06	5.29803e+06	0	0.001475	High	3.25256	High	3.38674	High	3.76457	0
	AAFDDAIAELDTLSEESYK	5	1	1	P62258		2087.97	304651	751831	740847	0	0.0003717	High	3.23296	High	2.26259	High	3.00391	0
	AAFDDAIAELDTLSEESYKDSTLIMQLLR	1	1	1	P62258		3258.6	0	0	0	0	0.0004746	High	3.1907					1
	LICCDILDVLDKHLIPAANTGESK	2	1	1	P62258	C3(Carbamidomethyl); C4(Carbamidomethyl)	2695.38	722533	1.74982e+06	0	0	0.0001987	High	2.646	High	1.88153			1
	LICCDILDVLDK	1	1	1	P62258	C3(Carbamidomethyl); C4(Carbamidomethyl)	1476.74	178680	0	0	0	3.458e-05	High	2.60596					0
	YLAEFATGNDRKEAAENSLVAYK	4	1	1	P62258		2560.27	1.69947e+06	5.71894e+06	2.20022e+06	0	4.974e-06	High	1.91439	High	5.09002	High	4.31343	2
	VAGMDVELTVEER	2	1	1	P62258		1447.71	0	631508	0	0	0.0001952			High	4.13422	High	3.09003	0
	YLAEFATGNDR	3	1	1	P62258		1256.59	0	606745	575879	0	0.004357			High	3.14042	High	3.13405	0
	DNLTLWTSDMQGDGEEQNKEALQDVEDENQ	2	1	1	P62258		3451.47	888643	0	0	0.001	0.006611	High	2.0226					1
	HLIPAANTGESK	4	1	1	P62258		1237.65	0	445814	511980	0.002	0.02006			High	2.14673	High	2.45069	0
	YDEMVESMKK	1	1	1	P62258		1259.56	0	0	0	0.002	0.02559					High	2.25029	1
Q71U36	Tubulin alpha-1A chain OS=Homo sapiens OX=9606 GN=TUBA1A PE=1 SV=1 - [TBA1A_HUMAN]	59.65	1	3	22	198	8.61341e+06	2.30843e+07	2.21139e+07	169.371	59.42	21	53	243.876	58.54	21	72	247.866	58.54	21	73	451	50.1036	5.05908
	Sequence	# PSMs	# Proteins	# Protein Groups	Protein Group Accessions	Modifications	MH+ [Da]	A5: Area	B5: Area	C5: Area	q-Value	PEP	A2	XCorr A2	B2	XCorr B2	C2	XCorr C2	# Missed Cleavages
	AVCMLSNTTAIAEAWAR	10	2	2	Q71U36;P68363	C3(Carbamidomethyl)	1864.91	2.01602e+06	5.64581e+06	5.27588e+06	0	2.4e-09	High	5.79596	High	6.19369	High	5.88368	0
	RTIQFVDWCPTGFK	3	1	1	Q71U36	C9(Carbamidomethyl)	1754.87	582544	1.21511e+06	945104	0	1.155e-06	High	5.47164	High	3.35152	High	3.2384	1
	TIGGGDDSFNTFFSETGAGK	16	2	2	Q71U36;P68363		2007.9	3.83003e+06	1.12194e+07	1.20706e+07	0	3.196e-09	High	5.42495	High	6.0789	High	5.84174	0
	VGINYQPPTVVPGGDLAK	19	2	2	Q71U36;P68363		1824.99	8.68952e+06	2.08235e+07	2.14008e+07	0	3.999e-08	High	4.80293	High	4.77781	High	4.19998	0
	AYHEQLSVAEITNACFEPANQMVK	7	2	2	Q71U36;P68363	C15(Carbamidomethyl)	2750.3	2.17068e+06	6.40142e+06	6.12954e+06	0	2.6e-07	High	4.53892	High	4.37147	High	5.66417	0
	AVFVDLEPTVIDEVR	17	2	2	Q71U36;P68363		1701.91	7.6286e+06	1.67026e+07	1.77631e+07	0	3.57e-09	High	4.36703	High	4.49462	High	4.59138	0
	IHFPLATYAPVISAEK	29	2	2	Q71U36;P68363		1756.97	6.51876e+06	2.21241e+07	1.69341e+07	0	1.604e-07	High	4.07744	High	4.58435	High	4.49126	0
	LIGQIVSSITASLR	9	1	1	Q71U36		1457.87	1.00535e+06	668312	2.35053e+06	0	5.002e-07	High	3.95869	High	2.63128	High	4.08546	0
	DVNAAIATIK	8	2	2	Q71U36;P68363		1015.58	4.61882e+06	1.03683e+07	1.09433e+07	0	1.926e-05	High	3.7777	High	3.49363	High	3.66828	0
	QLFHPEQLITGKEDAANNYAR	11	2	2	Q71U36;P68363		2415.21	9.52211e+06	2.63054e+07	2.71777e+07	0	2.54e-06	High	3.69381	High	4.50188	High	4.14674	1
	TIQFVDWCPTGFK	13	1	1	Q71U36	C8(Carbamidomethyl)	1598.77	5.84019e+06	1.02459e+07	1.10784e+07	0	4.53e-07	High	3.55726	High	4.01721	High	3.84708	0
	LDHKFDLMYAK	9	2	2	Q71U36;P68363		1380.7	2.17087e+06	5.99106e+06	6.63001e+06	0	9.488e-07	High	3.51118	High	3.69922	High	3.9034	1
	YMACCLLYR	3	2	2	Q71U36;P68363	C4(Carbamidomethyl); C5(Carbamidomethyl)	1249.55	2.84193e+06	0	6.01465e+06	0	4.978e-05	High	3.33337	High	3.25177	High	3.34889	0
	NLDIERPTYTNLNR	9	2	2	Q71U36;P68363		1718.89	4.57309e+06	1.53024e+07	1.66569e+07	0	0.003381	High	3.27596	High	3.63632	High	3.57626	0
	EIIDLVLDR	5	2	2	Q71U36;P68363		1085.62	890933	1.86197e+06	1.86522e+06	0	0.0001275	High	2.66436	High	3.09019	High	2.89083	0
	AFVHWYVGEGMEEGEFSEAR	3	2	2	Q71U36;P68363		2330.02	0	1.3987e+06	1.33777e+06	0	5.032e-07	High	2.26292	High	3.96685	High	3.83212	0
	AVFVDLEPTVIDEVRTGTYR	1	2	2	Q71U36;P68363		2280.19	642140	0	0	0	8.465e-05	High	2.24534					1
	YMACCLLYRGDVVPK	3	2	2	Q71U36;P68363	C4(Carbamidomethyl); C5(Carbamidomethyl)	1844.89	853573	2.54256e+06	2.80147e+06	0	0.0006574	High	2.05845	High	2.28298	High	1.98938	1
	FDGALNVDLTEFQTNLVPYPR	6	2	2	Q71U36;P68363		2409.21	793484	2.82526e+06	2.6775e+06	0	1.38e-09	High	1.84667	High	4.04095	High	2.0554	0
	TIGGGDDSFNTFFSETGAGKHVPR	3	2	2	Q71U36;P68363		2497.18	882920	4.23727e+06	4.05073e+06	0	0.004469	High	1.79145	High	1.77944	High	2.8566	1
	QLFHPEQLITGK	7	2	2	Q71U36;P68363		1410.78	1.28997e+06	2.58332e+06	2.8364e+06	0	0.001776	High	1.36898	High	2.66157	High	2.53226	0
	AVCMLSNTTAIAEAWAR	4	2	2	Q71U36;P68363	C3(Carbamidomethyl); M4(Oxidation)	1880.9	0	800362	776057	0	2.651e-06			High	4.06995	High	4.23092	0
	LDHKFDLMYAKR	2	2	2	Q71U36;P68363		1536.8	0	1.48871e+06	1.7889e+06	0	3.232e-06			High	3.67306	High	2.982	2
	AYHEQLSVAEITNACFEPANQMVK	1	2	2	Q71U36;P68363	C15(Carbamidomethyl); M22(Oxidation)	2766.29	0	0	484040	0	0.0008579					High	3.20588	0
P68363	Tubulin alpha-1B chain OS=Homo sapiens OX=9606 GN=TUBA1B PE=1 SV=1 - [TBA1B_HUMAN]	59.65	1	3	22	183	8.61341e+06	2.30843e+07	2.21139e+07	154.947	59.2	20	47	224.639	58.31	20	67	231.005	58.54	21	69	451	50.1196	5.05908
	Sequence	# PSMs	# Proteins	# Protein Groups	Protein Group Accessions	Modifications	MH+ [Da]	A5: Area	B5: Area	C5: Area	q-Value	PEP	A2	XCorr A2	B2	XCorr B2	C2	XCorr C2	# Missed Cleavages
	AVCMLSNTTAIAEAWAR	10	2	2	Q71U36;P68363	C3(Carbamidomethyl)	1864.91	2.01602e+06	5.64581e+06	5.27588e+06	0	2.4e-09	High	5.79596	High	6.19369	High	5.88368	0
	TIGGGDDSFNTFFSETGAGK	16	2	2	Q71U36;P68363		2007.9	3.83003e+06	1.12194e+07	1.20706e+07	0	3.196e-09	High	5.42495	High	6.0789	High	5.84174	0
	VGINYQPPTVVPGGDLAK	19	2	2	Q71U36;P68363		1824.99	8.68952e+06	2.08235e+07	2.14008e+07	0	3.999e-08	High	4.80293	High	4.77781	High	4.19998	0
	AYHEQLSVAEITNACFEPANQMVK	7	2	2	Q71U36;P68363	C15(Carbamidomethyl)	2750.3	2.17068e+06	6.40142e+06	6.12954e+06	0	2.6e-07	High	4.53892	High	4.37147	High	5.66417	0
	AVFVDLEPTVIDEVR	17	2	2	Q71U36;P68363		1701.91	7.6286e+06	1.67026e+07	1.77631e+07	0	3.57e-09	High	4.36703	High	4.49462	High	4.59138	0
	SIQFVDWCPTGFK	3	1	1	P68363	C8(Carbamidomethyl)	1584.76	1.62445e+06	0	3.31485e+06	0	1.695e-06	High	4.1233	High	4.27114	High	4.03827	0
	IHFPLATYAPVISAEK	29	2	2	Q71U36;P68363		1756.97	6.51876e+06	2.21241e+07	1.69341e+07	0	1.604e-07	High	4.07744	High	4.58435	High	4.49126	0
	DVNAAIATIK	8	2	2	Q71U36;P68363		1015.58	4.61882e+06	1.03683e+07	1.09433e+07	0	1.926e-05	High	3.7777	High	3.49363	High	3.66828	0
	QLFHPEQLITGKEDAANNYAR	11	2	2	Q71U36;P68363		2415.21	9.52211e+06	2.63054e+07	2.71777e+07	0	2.54e-06	High	3.69381	High	4.50188	High	4.14674	1
	LDHKFDLMYAK	9	2	2	Q71U36;P68363		1380.7	2.17087e+06	5.99106e+06	6.63001e+06	0	9.488e-07	High	3.51118	High	3.69922	High	3.9034	1
	YMACCLLYR	3	2	2	Q71U36;P68363	C4(Carbamidomethyl); C5(Carbamidomethyl)	1249.55	2.84193e+06	0	6.01465e+06	0	4.978e-05	High	3.33337	High	3.25177	High	3.34889	0
	NLDIERPTYTNLNR	9	2	2	Q71U36;P68363		1718.89	4.57309e+06	1.53024e+07	1.66569e+07	0	0.003381	High	3.27596	High	3.63632	High	3.57626	0
	LISQIVSSITASLR	6	1	1	P68363		1487.88	304954	491206	467111	0	0.0001133	High	2.94213	High	2.11805	High	3.8616	0
	EIIDLVLDR	5	2	2	Q71U36;P68363		1085.62	890933	1.86197e+06	1.86522e+06	0	0.0001275	High	2.66436	High	3.09019	High	2.89083	0
	AFVHWYVGEGMEEGEFSEAR	3	2	2	Q71U36;P68363		2330.02	0	1.3987e+06	1.33777e+06	0	5.032e-07	High	2.26292	High	3.96685	High	3.83212	0
	AVFVDLEPTVIDEVRTGTYR	1	2	2	Q71U36;P68363		2280.19	642140	0	0	0	8.465e-05	High	2.24534					1
	YMACCLLYRGDVVPK	3	2	2	Q71U36;P68363	C4(Carbamidomethyl); C5(Carbamidomethyl)	1844.89	853573	2.54256e+06	2.80147e+06	0	0.0006574	High	2.05845	High	2.28298	High	1.98938	1
	FDGALNVDLTEFQTNLVPYPR	6	2	2	Q71U36;P68363		2409.21	793484	2.82526e+06	2.6775e+06	0	1.38e-09	High	1.84667	High	4.04095	High	2.0554	0
	TIGGGDDSFNTFFSETGAGKHVPR	3	2	2	Q71U36;P68363		2497.18	882920	4.23727e+06	4.05073e+06	0	0.004469	High	1.79145	High	1.77944	High	2.8566	1
	QLFHPEQLITGK	7	2	2	Q71U36;P68363		1410.78	1.28997e+06	2.58332e+06	2.8364e+06	0	0.001776	High	1.36898	High	2.66157	High	2.53226	0
	AVCMLSNTTAIAEAWAR	4	2	2	Q71U36;P68363	C3(Carbamidomethyl); M4(Oxidation)	1880.9	0	800362	776057	0	2.651e-06			High	4.06995	High	4.23092	0
	LDHKFDLMYAKR	2	2	2	Q71U36;P68363		1536.8	0	1.48871e+06	1.7889e+06	0	3.232e-06			High	3.67306	High	2.982	2
	AYHEQLSVAEITNACFEPANQMVK	1	2	2	Q71U36;P68363	C15(Carbamidomethyl); M22(Oxidation)	2766.29	0	0	484040	0	0.0008579					High	3.20588	0
	RSIQFVDWCPTGFK	1	1	1	P68363	C9(Carbamidomethyl)	1740.85	0	0	224180	0.001	0.01493					High	2.48393	1
P27797	Calreticulin OS=Homo sapiens OX=9606 GN=CALR PE=1 SV=1 - [CALR_HUMAN]	59.47	1	15	15	95	2.63154e+06	1.37416e+07	1.40131e+07	82.9573	57.55	14	32	74.7185	47.48	10	31	70.2498	56.59	13	32	417	48.1118	4.43701
	Sequence	# PSMs	# Proteins	# Protein Groups	Protein Group Accessions	Modifications	MH+ [Da]	A5: Area	B5: Area	C5: Area	q-Value	PEP	A2	XCorr A2	B2	XCorr B2	C2	XCorr C2	# Missed Cleavages
	FYGDEEKDKGLQTSQDAR	8	1	1	P27797		2086.97	2.23323e+06	1.64058e+07	1.71353e+07	0	1.471e-08	High	4.96226	High	4.37188	High	2.91769	2
	FYALSASFEPFSNK	3	1	1	P27797		1607.78	544987	1.3439e+06	1.99095e+06	0	6.411e-10	High	4.7405	High	4.68953	High	4.12556	0
	KPEDWDEEMDGEWEPPVIQNPEYK	5	1	1	P27797		2960.3	807658	1.14555e+06	1.33985e+06	0	4.916e-07	High	4.46059	High	3.31242	High	3.69676	0
	AKIDDPTDSKPEDWDKPEHIPDPDAK	8	1	1	P27797		2959.4	2.88714e+06	1.10615e+07	1.21348e+07	0	3.115e-08	High	4.41071	High	2.74056	High	2.85837	1
	IDNSQVESGSLEDDWDFLPPKK	21	1	1	P27797		2519.2	2.53122e+06	1.22285e+07	1.25918e+07	0	2.723e-07	High	4.10775	High	4.08302	High	4.09102	1
	IKDPDASKPEDWDER	7	1	1	P27797		1800.84	2.40319e+06	1.25905e+07	1.23121e+07	0	1.499e-05	High	3.76197	High	4.07577	High	3.18274	1
	EQFLDGDGWTSR	9	1	1	P27797		1410.63	2.47627e+06	6.9089e+06	7.17783e+06	0	3.789e-05	High	3.69246	High	3.6097	High	4.00411	0
	LFPNSLDQTDMHGDSEYNIMFGPDICGPGTK	12	1	1	P27797	C26(Carbamidomethyl)	3456.51	1.16789e+06	2.01059e+06	692905	0	0.001083	High	3.69006	High	2.41666	High	2.7595	0
	CKDDEFTHLYTLIVRPDNTYEVK	4	1	1	P27797	C1(Carbamidomethyl)	2856.39	2.34272e+06	4.56615e+06	4.80019e+06	0	0.001616	High	2.76974	High	2.3989	High	2.87031	1
	IDDPTDSKPEDWDKPEHIPDPDAK	2	1	1	P27797		2760.26	536771	0	2.3446e+06	0	0.002676	High	2.19579			High	2.1729	0
	HEQNIDCGGGYVK	9	1	1	P27797	C7(Carbamidomethyl)	1476.66	71430.2	280944	361973	0	6.573e-05	High	2.06147	High	3.15228	High	3.20446	0
	SGTIFDNFLITNDEAYAEEFGNETWGVTK	3	1	1	P27797		3268.5	2.00412e+06	0	0	0	0.0009465	High	1.56542			High	1.29565	0
	SDFGKFVLSSGK	2	1	1	P27797		1271.67	0	0	0	0.001	0.02249	High	2.51954					1
	LFPNSLDQTDMHGDSEYNIMFGPDICGPGTKK	1	1	1	P27797	C26(Carbamidomethyl)	3584.62	419716	0	0	0.001	0.009675	High	0.817416					1
	KVHVIFNYK	1	1	1	P27797		1147.66	0	0	930161	0.002	0.02606					High	1.97719	1
P30041	Peroxiredoxin-6 OS=Homo sapiens OX=9606 GN=PRDX6 PE=1 SV=3 - [PRDX6_HUMAN]	59.38	1	12	12	32	1.23665e+06	2.79451e+06	2.73497e+06	26.4332	54.46	10	10	22.4533	59.38	9	12	20.8369	59.38	8	10	224	25.0192	6.37939
	Sequence	# PSMs	# Proteins	# Protein Groups	Protein Group Accessions	Modifications	MH+ [Da]	A5: Area	B5: Area	C5: Area	q-Value	PEP	A2	XCorr A2	B2	XCorr B2	C2	XCorr C2	# Missed Cleavages
	DINAYNCEEPTEKLPFPIIDDR	3	1	1	P30041	C7(Carbamidomethyl)	2649.25	501242	1.08112e+06	1.12661e+06	0	8.731e-07	High	3.95577	High	2.73679	High	3.21938	1
	VATPVDWKDGDSVMVLPTIPEEEAK	5	1	1	P30041		2726.36	1.35738e+06	2.66606e+06	2.57056e+06	0	0.0008319	High	3.80888	High	2.70977	High	2.90547	1
	NRELAILLGMLDPAEKDEK	3	1	1	P30041		2155.15	210539	555142	640723	0	0.002468	High	3.32262	High	2.41523	High	2.64439	2
	ELAILLGMLDPAEKDEK	1	1	1	P30041		1885	145470	0	0	0	0.0009709	High	2.91823					1
	DFTPVCTTELGR	3	1	1	P30041	C6(Carbamidomethyl)	1395.66	1.47983e+06	3.81568e+06	3.79221e+06	0	2.832e-05	High	2.72584	High	3.42772	High	3.5889	0
	FHDFLGDSWGILFSHPR	3	1	1	P30041		2030.99	224692	443893	660487	0	0.0007116	High	2.62341	High	1.83908	High	2.83081	0
	LIALSIDSVEDHLAWSK	6	1	1	P30041		1897.01	872752	1.90179e+06	1.84214e+06	0	7.761e-05	High	2.4179	High	2.11804	High	1.74521	0
	DINAYNCEEPTEKLPFPIIDDRNR	1	1	1	P30041	C7(Carbamidomethyl)	2919.4	486186	0	0	0	0.0003308	High	2.38602					2
	VVFVFGPDKK	3	1	1	P30041		1135.65	406920	722795	757133	0	0.003451	High	2.18106	High	1.95722	High	1.96194	1
	LSILYPATTGR	2	1	1	P30041		1191.67	0	1.39918e+06	1.52253e+06	0	0.0001914			High	3.31073	High	2.93666	0
	DINAYNCEEPTEK	1	1	1	P30041	C7(Carbamidomethyl)	1582.67	0	208372	0	0	3.362e-05			High	3.09844			0
	DGDSVMVLPTIPEEEAK	1	1	1	P30041		1829.88	136620	0	0	0.001	0.01079	High	2.47952					0
P30044	Peroxiredoxin-5, mitochondrial OS=Homo sapiens OX=9606 GN=PRDX5 PE=1 SV=4 - [PRDX5_HUMAN]	59.35	1	15	15	147	1.58111e+07	3.82143e+07	3.9144e+07	150.387	57.48	13	57	136.16	58.41	13	47	124.134	57.94	13	43	214	22.0725	8.70459
	Sequence	# PSMs	# Proteins	# Protein Groups	Protein Group Accessions	Modifications	MH+ [Da]	A5: Area	B5: Area	C5: Area	q-Value	PEP	A2	XCorr A2	B2	XCorr B2	C2	XCorr C2	# Missed Cleavages
	KGVLFGVPGAFTPGCSK	14	1	1	P30044	C15(Carbamidomethyl)	1721.91	6.47498e+06	1.58296e+07	1.62678e+07	0	1.057e-07	High	4.86329	High	4.82344	High	4.12372	1
	VGDAIPAVEVFEGEPGNKVNLAELFK	14	1	1	P30044		2742.44	1.80367e+07	4.63712e+07	4.49982e+07	0	6.621e-05	High	4.49186	High	2.69976	High	2.02845	1
	FSMVVQDGIVK	6	1	1	P30044	M3(Oxidation)	1238.65	1.36422e+06	2.88904e+06	3.02855e+06	0	6.665e-06	High	4.31094	High	4.24001	High	4.31414	0
	THLPGFVEQAEALKAK	15	1	1	P30044		1738.95	5.89003e+06	1.53827e+07	1.66235e+07	0	1.796e-05	High	4.2339	High	4.44365	High	4.20707	1
	THLPGFVEQAEALK	18	1	1	P30044		1539.82	1.13826e+07	2.32861e+07	2.39632e+07	0	9.381e-08	High	4.20288	High	4.10357	High	4.32461	0
	FSMVVQDGIVK	5	1	1	P30044		1222.65	1.4268e+07	3.01957e+07	3.17157e+07	0	1.775e-06	High	3.98877	High	3.73856	High	3.86966	0
	ALNVEPDGTGLTCSLAPNIISQL	13	1	1	P30044	C13(Carbamidomethyl)	2383.22	1.4194e+07	2.85248e+07	2.70113e+07	0	0.0001828	High	3.97935	High	2.55043	High	2.54241	0
	VGDAIPAVEVFEGEPGNK	7	1	1	P30044		1827.92	633894	1.40577e+06	1.33796e+06	0	5.421e-08	High	3.94921	High	4.2791	High	3.80505	0
	RFSMVVQDGIVK	2	1	1	P30044		1378.75	1.20271e+06	0	0	0	4.128e-06	High	3.81881					1
	GVLFGVPGAFTPGCSK	22	1	1	P30044	C14(Carbamidomethyl)	1593.81	1.51284e+07	3.80759e+07	4.0718e+07	0	4.144e-05	High	3.76491	High	3.63044	High	3.45845	0
	LLADPTGAFGKETDLLLDDSLVSIFGNR	9	1	1	P30044		2977.55	437265	3.10567e+06	3.26229e+06	0	7.388e-06	High	3.69695	High	2.36163	High	2.57058	1
	LLADPTGAFGK	6	1	1	P30044		1089.59	1.02265e+07	2.16092e+07	2.20797e+07	0	1.436e-05	High	2.93745	High	3.15446	High	3.1876	0
	ETDLLLDDSLVSIFGNR	7	1	1	P30044		1906.98	375871	1.37912e+06	1.24871e+06	0	6.618e-07	High	2.76296	High	3.03135	High	3.55445	0
	LLADPTGAFGKETDLLLDDSLVSIFGNRR	6	1	1	P30044		3133.65	6.62794e+06	0	5.29551e+06	0	0.0001288	High	2.26424			High	2.23394	2
	GKKGVLFGVPGAFTPGCSK	2	1	1	P30044	C17(Carbamidomethyl)	1907.02	0	1.01649e+06	1.0605e+06	0	0.0002187			High	3.50086	High	2.6932	2
	VRLLADPTGAFGK	1	1	1	P30044		1344.76	0	492692	0	0.003	0.03813			High	2.31205			1
P10809	60 kDa heat shock protein, mitochondrial OS=Homo sapiens OX=9606 GN=HSPD1 PE=1 SV=2 - [CH60_HUMAN]	59.34	1	24	24	123	2.6138e+06	6.02586e+06	5.85534e+06	126.127	55.15	21	48	103.906	39.62	15	35	105.155	41.88	16	40	573	61.0164	5.87158
	Sequence	# PSMs	# Proteins	# Protein Groups	Protein Group Accessions	Modifications	MH+ [Da]	A5: Area	B5: Area	C5: Area	q-Value	PEP	A2	XCorr A2	B2	XCorr B2	C2	XCorr C2	# Missed Cleavages
	ALMLQGVDLLADAVAVTMGPK	21	1	1	P10809		2113.14	2.89984e+06	6.10924e+06	5.46089e+06	0	1e-08	High	5.20515	High	3.8991	High	4.32754	0
	LVQDVANNTNEEAGDGTTTATVLAR	8	1	1	P10809		2560.25	2.6969e+06	5.84129e+06	5.44245e+06	0	8.936e-09	High	5.16096	High	5.08408	High	4.6694	0
	TLNDELEIIEGMK	4	1	1	P10809		1504.75	763362	1.03058e+06	980347	0	4.671e-07	High	4.67223	High	3.92692	High	4.33383	0
	TVIIEQSWGSPK	7	1	1	P10809		1344.72	2.24466e+06	6.12705e+06	6.66269e+06	0	3.174e-07	High	4.58663	High	4.87571	High	5.12601	0
	VGEVIVTKDDAMLLK	3	1	1	P10809		1630.91	1.02008e+06	905523	913374	0	1.773e-06	High	4.43389	High	4.53808	High	3.80922	1
	ALMLQGVDLLADAVAVTMGPK	11	1	1	P10809	M18(Oxidation)	2129.14	494762	892951	975145	0	1.149e-07	High	4.42097	High	3.0053	High	3.10395	0
	TLKIPAMTIAK	11	1	1	P10809		1186.72	1.79198e+06	2.41755e+06	2.71637e+06	0	3.193e-06	High	3.99096	High	3.33193	High	3.31797	1
	AAVEEGIVLGGGCALLR	7	1	1	P10809	C13(Carbamidomethyl)	1684.91	943588	1.74086e+06	860789	0	1.899e-08	High	3.9054	High	5.037	High	4.74553	0
	IMQSSSEVGYDAMAGDFVNMVEK	7	1	1	P10809		2508.11	1.34126e+06	2.41464e+06	2.48922e+06	0	4.37e-05	High	3.47028	High	2.83555	High	3.33955	0
	VGLQVVAVK	2	1	1	P10809		912.588	818754	0	0	0	5.194e-05	High	3.42768					0
	CEFQDAYVLLSEKK	3	1	1	P10809	C1(Carbamidomethyl)	1729.85	381183	1.30854e+06	1.47774e+06	0	4.979e-06	High	3.19721	High	4.58299	High	3.86111	1
	CEFQDAYVLLSEK	1	1	1	P10809	C1(Carbamidomethyl)	1601.75	128939	0	0	0	6.181e-06	High	3.10655					0
	TLNDELEIIEGMKFDR	4	1	1	P10809		1922.95	1.9425e+06	2.27624e+06	2.23185e+06	0	2.783e-05	High	3.02965	High	1.80758	High	2.82214	1
	KISSIQSIVPALEIANAHR	1	1	1	P10809		2047.17	504711	0	0	0	0.002708	High	2.98685					1
	CIPALDSLTPANEDQK	1	1	1	P10809	C1(Carbamidomethyl)	1771.85	310847	0	0	0	1.929e-05	High	2.92369					0
	NAGVEGSLIVEK	4	1	1	P10809		1215.66	701904	3.14385e+06	3.55627e+06	0	1.139e-06	High	2.88026	High	4.04878	High	3.48452	0
	LSDGVAVLK	6	1	1	P10809		901.536	1.30825e+06	0	2.67005e+06	0	9.438e-05	High	2.85091			High	2.99755	0
	GVMLAVDAVIAELKK	3	1	1	P10809		1556.91	447382	0	0	0	8.22e-07	High	2.61759					1
	IQEIIEQLDVTTSEYEKEKLNER	2	1	1	P10809		2807.43	599202	0	1.84559e+06	0	0.0003734	High	2.49601			High	1.39804	2
	ISSIQSIVPALEIANAHR	3	1	1	P10809		1919.09	2.08495e+06	3.66946e+06	4.13993e+06	0	3.082e-05	High	1.95304	High	3.24577	High	2.53323	0
	TALLDAAGVASLLTTAEVVVTEIPK	1	1	1	P10809		2482.4	38375.7	0	0	0	0.00238	High	1.21009					0
	GYISPYFINTSK	3	1	1	P10809		1389.71	0	5.39789e+06	5.282e+06	0	2.317e-07			High	4.08531	High	3.47767	0
	VGGTSDVEVNEK	3	1	1	P10809		1233.6	0	312811	540123	0	0.0001695			High	2.68394	High	3.41364	0
	QSKPVTTPEEIAQVATISANGDKEIGNIISDAMKK	2	1	1	P10809		3683.92	1.99376e+06	0	0	0.001	0.008486	High	2.73076					2
	IQEIIEQLDVTTSEYEKEK	1	1	1	P10809		2295.17	0	912538	0	0.002	0.02786			High	2.8797			1
	VGEVIVTKDDAMLLK	1	1	1	P10809	M12(Oxidation)	1646.91	0	0	136682	0.002	0.02622					High	2.32143	1
	IMQSSSEVGYDAMAGDFVNMVEK	2	1	1	P10809	M2(Oxidation)	2524.11	0	231508	0	0.003	0.03907			High	1.66989	High	2.01507	0
	ALMLQGVDLLADAVAVTMGPK	1	1	1	P10809	M3(Oxidation); M18(Oxidation)	2145.13	0	115879	0	0.005	0.05685			High	1.18506			0
O00161	Synaptosomal-associated protein 23 OS=Homo sapiens OX=9606 GN=SNAP23 PE=1 SV=1 - [SNP23_HUMAN]	59.24	1	7	7	13	851885	971178	1.00896e+06	7.26241	30.33	3	3	14.3073	31.75	4	4	20.8662	47.39	6	6	211	23.3395	5.0083
	Sequence	# PSMs	# Proteins	# Protein Groups	Protein Group Accessions	Modifications	MH+ [Da]	A5: Area	B5: Area	C5: Area	q-Value	PEP	A2	XCorr A2	B2	XCorr B2	C2	XCorr C2	# Missed Cleavages
	ILGLAIESQDAGIK	3	1	1	O00161		1427.81	851885	1.64179e+06	1.70071e+06	0	1.885e-06	High	4.72924	High	4.36586	High	4.05984	0
	QPGPVTNGQLQQPTTGAASGGYIKR	3	1	1	O00161		2526.31	0	677094	725893	0	1.903e-06	High	1.99106	High	2.14097	High	3.43639	1
	TTWGDGGENSPCNVVSK	2	1	1	O00161	C12(Carbamidomethyl)	1807.8	0	594651	600287	0	9.341e-09			High	4.67971	High	4.98075	0
	CCGLCVCPCNR	2	1	1	O00161	C1(Carbamidomethyl); C2(Carbamidomethyl); C5(Carbamidomethyl); C7(Carbamidomethyl); C9(Carbamidomethyl)	1455.55	0	206404	233184	0	0.002039			High	3.12081	High	3.24128	0
	DMALNIGNEIDAQNPQIKR	1	1	1	O00161		2140.08	0	0	120515	0	0.001518					High	3.07081	1
	ITNDAREDEMEENLTQVGSILGNLK	1	1	1	O00161		2789.36	0	0	0	0.001	0.01167	High	2.53317					1
	TITMLDEQKEQLNR	1	1	1	O00161		1718.88	0	0	476969	0.001	0.01658					High	2.07712	1
P63241	Eukaryotic translation initiation factor 5A-1 OS=Homo sapiens OX=9606 GN=EIF5A PE=1 SV=2 - [IF5A1_HUMAN]	58.44	3	7	7	21	682253	1.51494e+06	1.17599e+06	11.0661	35.06	4	5	19.411	50	5	10	9.07601	57.14	5	6	154	16.8214	5.23682
	Sequence	# PSMs	# Proteins	# Protein Groups	Protein Group Accessions	Modifications	MH+ [Da]	A5: Area	B5: Area	C5: Area	q-Value	PEP	A2	XCorr A2	B2	XCorr B2	C2	XCorr C2	# Missed Cleavages
	KYEDICPSTHNMDVPNIK	2	3	1	P63241	C6(Carbamidomethyl)	2161	586631	1.37281e+06	0	0	2.179e-07	High	4.81777	High	3.72927			1
	VHLVGIDIFTGK	6	3	1	P63241		1298.75	1.13353e+06	1.59405e+06	1.58537e+06	0	4.264e-05	High	3.41251	High	3.23108	High	3.55403	0
	YEDICPSTHNMDVPNIKR	1	3	1	P63241	C5(Carbamidomethyl)	2189.02	326599	0	0	0	0.00439	High	1.28393					1
	NDFQLIGIQDGYLSLLQDSGEVR	7	1	1	P63241		2580.3	0	1.57795e+06	1.25658e+06	0	1.426e-05	High	1.08208	High	3.03769	High	1.72625	0
	YEDICPSTHNMDVPNIK	2	3	1	P63241	C5(Carbamidomethyl)	2032.91	0	717696	686006	0	0.003663			High	2.20457	High	1.81425	0
	YDCGEEILITVLSAMTEEAAVAIK	2	2	1	P63241	C3(Carbamidomethyl)	2626.31	0	18350.2	26563.7	0.001	0.008195			High	1.32205	High	1.66537	0
	EDLRLPEGDLGK	1	1	1	P63241		1341.7	0	0	671964	0.001	0.01247					High	2.49152	1
Q16777	Histone H2A type 2-C OS=Homo sapiens OX=9606 GN=HIST2H2AC PE=1 SV=4 - [H2A2C_HUMAN]	58.14	7	3	6	116	2.13822e+07	4.78379e+07	5.01078e+07	108.909	58.14	6	47	92.7226	35.66	5	32	99.5372	58.14	6	37	129	13.9798	10.9019
	Sequence	# PSMs	# Proteins	# Protein Groups	Protein Group Accessions	Modifications	MH+ [Da]	A5: Area	B5: Area	C5: Area	q-Value	PEP	A2	XCorr A2	B2	XCorr B2	C2	XCorr C2	# Missed Cleavages
	VTIAQGGVLPNIQAVLLPK	63	10	2	P04908;Q16777		1931.17	2.70382e+07	6.24308e+07	6.61597e+07	0	1.193e-08	High	5.5393	High	4.65471	High	5.60286	0
	NDEELNKLLGK	12	7	1	Q16777		1272.68	1.5033e+06	3.88688e+06	4.12352e+06	0	4.897e-05	High	3.50644	High	4.1453	High	4.1958	1
	AGLQFPVGR	22	14	4	Q96QV6;P04908;Q16777;P0C0S5		944.533	3.29997e+07	6.55357e+07	6.78496e+07	0	0.0001125	High	3.37155	High	3.33099	High	3.21943	0
	VGAGAPVYMAAVLEYLTAEILELAGNAAR	1	2	1	Q16777		2933.54	23835	0	0	0	0.0003571	High	3.32776					0
	HLQLAIRNDEELNKLLGK	13	7	1	Q16777		2104.19	4.10871e+06	1.55472e+07	1.6314e+07	0	6.442e-07	High	3.15289	High	2.15117	High	2.25323	2
	VGAGAPVYMAAVLEYLTAEILELAGNAAR	2	2	1	Q16777	M9(Oxidation)	2949.53	80311.8	0	91257.2	0	0.0008167	High	2.66362			High	2.13819	0
	HLQLAIRNDEELNK	3	12	3	Q96QV6;P04908;Q16777		1692.9	96924.8	3.29069e+06	3.52261e+06	0	5.132e-05	High	2.26251	High	3.72488	High	3.53306	1
P08294	Extracellular superoxide dismutase [Cu-Zn] OS=Homo sapiens OX=9606 GN=SOD3 PE=1 SV=2 - [SODE_HUMAN]	57.08	1	7	7	20	774849	1.59692e+06	1.91038e+06	24.6597	35.83	5	8	20.8812	39.17	5	7	15.9886	13.33	2	5	240	25.8347	6.60986
	Sequence	# PSMs	# Proteins	# Protein Groups	Protein Group Accessions	Modifications	MH+ [Da]	A5: Area	B5: Area	C5: Area	q-Value	PEP	A2	XCorr A2	B2	XCorr B2	C2	XCorr C2	# Missed Cleavages
	AIHVHQFGDLSQGCESTGPHYNPLAVPHPQHPGDFGNFAVR	3	1	1	P08294	C14(Carbamidomethyl)	4491.15	341568	0	0	0	3.662e-05	High	5.27249					0
	LACCVVGVCGPGLWER	7	1	1	P08294	C3(Carbamidomethyl); C4(Carbamidomethyl); C9(Carbamidomethyl)	1832.86	352679	1.25606e+06	1.42586e+06	0	5.976e-10	High	4.62558	High	5.29022	High	4.80011	0
	VTEIWQEVMQR	2	1	1	P08294		1418.71	783575	1.39123e+06	0	0	8.642e-06	High	3.87496	High	4.23216			0
	AGLAASLAGPHSIVGR	5	1	1	P08294		1476.84	1.18829e+06	2.14347e+06	2.39491e+06	0	0.002278	High	2.6834	High	2.88081	High	3.69067	0
	DDDGALHAACQVQPSATLDAAQPR	1	1	1	P08294	C10(Carbamidomethyl)	2507.16	0	422766	0	0	2.54e-06			High	3.70615			0
	AVVVHAGEDDLGRGGNQASVENGNAGR	1	1	1	P08294		2649.28	0	824232	0	0.002	0.03108			High	1.98987			1
	YRAGLAASLAGPHSIVGR	1	1	1	P08294		1796	103506	0	0	0.003	0.04516	High	2.19837					1
P58546	Myotrophin OS=Homo sapiens OX=9606 GN=MTPN PE=1 SV=2 - [MTPN_HUMAN]	56.78	1	5	5	13	548752	2.1673e+06	3.21425e+06	12.8247	33.05	3	4	20.4308	56.78	5	6	13.3348	30.51	2	3	118	12.8866	5.51611
	Sequence	# PSMs	# Proteins	# Protein Groups	Protein Group Accessions	Modifications	MH+ [Da]	A5: Area	B5: Area	C5: Area	q-Value	PEP	A2	XCorr A2	B2	XCorr B2	C2	XCorr C2	# Missed Cleavages
	GPDGLTAFEATDNQAIK	6	1	1	P58546		1747.85	1.02006e+06	3.19796e+06	3.58178e+06	0	1.523e-08	High	4.45639	High	5.42026	High	5.47995	0
	NGDLDEVKDYVAKGEDVNR	3	1	1	P58546		2136.02	498180	2.85487e+06	2.84673e+06	0	0.003505	High	2.53743	High	2.7814	High	3.26801	2
	TVKGPDGLTAFEATDNQAIK	2	1	1	P58546		2076.06	128016	449082	0	0.002	0.02677	High	2.7106	High	2.84845			1
	NGDLDEVKDYVAK	1	1	1	P58546		1465.72	0	163982	0	0.002	0.01953			High	2.98673			1
	GADINAPDKHHITPLLSAVYEGHVSCVK	1	1	1	P58546	C26(Carbamidomethyl)	3028.51	0	384044	0	0.008	0.09603			High	3.10257			1
P37802	Transgelin-2 OS=Homo sapiens OX=9606 GN=TAGLN2 PE=1 SV=3 - [TAGL2_HUMAN]	56.28	1	10	10	48	1.56014e+06	2.28089e+06	2.38581e+06	46.3867	56.28	9	17	32.6891	51.76	7	14	40.4437	51.76	8	17	199	22.3772	8.25049
	Sequence	# PSMs	# Proteins	# Protein Groups	Protein Group Accessions	Modifications	MH+ [Da]	A5: Area	B5: Area	C5: Area	q-Value	PEP	A2	XCorr A2	B2	XCorr B2	C2	XCorr C2	# Missed Cleavages
	QMEQISQFLQAAER	7	1	1	P37802		1678.83	1.08605e+06	2.32363e+06	2.31954e+06	0	2.344e-08	High	4.75692	High	3.46087	High	4.55906	0
	YGINTTDIFQTVDLWEGK	12	1	1	P37802		2100.04	589694	1.78442e+06	1.74598e+06	0	6.704e-08	High	4.61414	High	3.66214	High	3.05371	0
	TLMNLGGLAVAR	1	1	1	P37802		1215.69	2.6593e+06	0	0	0	5.477e-07	High	4.05872					0
	DDGLFSGDPNWFPK	6	1	1	P37802		1594.72	935072	2.20638e+06	2.4372e+06	0	1.078e-05	High	3.75245	High	4.22444	High	4.10074	0
	NVIGLQMGTNR	1	1	1	P37802		1202.63	325260	0	0	0	4.195e-05	High	3.31526					0
	DDGLFSGDPNWFPKK	8	1	1	P37802		1722.82	723976	2.31264e+06	2.4007e+06	0	0.0003838	High	3.24272	High	3.277	High	3.72213	1
	TLMNLGGLAVAR	3	1	1	P37802	M3(Oxidation)	1231.69	464064	533753	568712	0	0.0002726	High	2.69086	High	3.18458	High	3.19812	0
	DGTVLCELINALYPEGQAPVKK	5	1	1	P37802	C6(Carbamidomethyl)	2415.26	0	1.58382e+06	956641	0	0.0008961	High	1.73232	High	1.52678	High	1.6421	1
	NFSDNQLQEGKNVIGLQMGTNR	3	1	1	P37802		2463.21	63892.3	0	0	0.001	0.009412	High	2.2934	High	2.13727	High	2.01812	1
	DGTVLCELINALYPEGQAPVK	1	1	1	P37802	C6(Carbamidomethyl)	2287.17	0	0	161182	0.003	0.03633					High	1.19751	0
	IQASTMAFK	1	1	1	P37802		996.519	433186	0	0	0.008	0.09391	High	1.84601					0
P26038	Moesin OS=Homo sapiens OX=9606 GN=MSN PE=1 SV=3 - [MOES_HUMAN]	55.46	1	24	30	178	8.44751e+06	1.65586e+07	1.80576e+07	135.945	45.58	24	49	185.845	50.43	24	64	191.701	44.02	24	65	577	67.7778	6.40479
	Sequence	# PSMs	# Proteins	# Protein Groups	Protein Group Accessions	Modifications	MH+ [Da]	A5: Area	B5: Area	C5: Area	q-Value	PEP	A2	XCorr A2	B2	XCorr B2	C2	XCorr C2	# Missed Cleavages
	IAQDLEMYGVNYFSIK	7	1	1	P26038		1890.93	309124	878786	894078	0	4.863e-08	High	4.96618	High	4.46833	High	4.40133	0
	TQEQLALEMAELTAR	5	1	1	P26038		1703.86	377075	926824	906433	0	2.951e-09	High	4.9383	High	3.21579	High	5.12517	0
	ERQEAEEAKEALLQASR	7	1	1	P26038		1958	1.35562e+06	3.30411e+06	3.32046e+06	0	4.464e-06	High	4.10983	High	4.0562	High	4.4099	2
	APDFVFYAPR	11	3	3	P15311;P26038;P35241		1182.6	7.42699e+06	1.64908e+07	1.72101e+07	0	2.247e-06	High	4.09676	High	4.26935	High	4.1559	0
	SGYLAGDKLLPQR	7	1	1	P26038		1417.79	906581	1.95836e+06	2.20406e+06	0	6.323e-05	High	3.99335	High	2.91412	High	2.78276	1
	ALTSELANARDESK	4	1	1	P26038		1504.76	601581	675873	715051	0	2.274e-06	High	3.88113	High	4.95407	High	4.82155	1
	EGILNDDIYCPPETAVLLASYAVQSK	9	1	1	P26038	C10(Carbamidomethyl)	2866.42	1.19093e+06	3.33452e+06	3.0637e+06	0	8.719e-05	High	3.59592	High	2.39302	High	2.40635	0
	AKFYPEDVSEELIQDITQR	9	1	1	P26038		2281.13	952019	2.58485e+06	2.76155e+06	0	0.0001394	High	3.52156	High	2.77641	High	3.54129	1
	ILALCMGNHELYMR	4	2	2	P26038;P35241	C5(Carbamidomethyl)	1720.84	706834	1.47913e+06	0	0	4.996e-06	High	3.36767	High	3.05419			0
	KAPDFVFYAPR	8	3	3	P15311;P26038;P35241		1310.69	1.93651e+06	2.77443e+06	2.92783e+06	0	0.002846	High	3.36089	High	3.57946	High	3.31171	1
	AQMVQEDLEK	7	1	1	P26038		1190.58	479243	787389	1.31855e+06	0	0.0003636	High	3.22061	High	3.47469	High	3.60769	0
	QEAEEAKEALLQASR	4	1	1	P26038		1672.85	381827	188125	212344	0	2.439e-05	High	3.1914	High	3.28027	High	2.95509	1
	RKPDTIEVQQMK	23	3	3	P15311;P26038;P35241		1472.79	2.19144e+06	5.20234e+06	7.45867e+06	0	7.17e-06	High	3.18619	High	3.82245	High	3.49179	1
	KTANDMIHAENMR	3	1	1	P26038		1530.72	257906	1.28472e+06	1.47754e+06	0	0.001102	High	3.16547	High	2.33118	High	3.1367	1
	IGFPWSEIR	18	3	3	P15311;P26038;P35241		1104.59	1.57241e+07	2.79828e+07	2.95042e+07	0	1.359e-05	High	3.02517	High	3.64955	High	3.85079	0
	GMLREDAVLEYLK	6	1	1	P26038		1536.81	1.48089e+06	2.83247e+06	3.07493e+06	0	2.309e-06	High	2.98733	High	3.32345	High	2.75553	1
	AQMVQEDLEKTR	3	1	1	P26038		1447.72	182737	0	2.1122e+06	0	0.004539	High	2.97322			High	3.04812	1
	FYPEDVSEELIQDITQR	9	1	1	P26038		2082	0	1.77943e+06	1.78918e+06	0	1.349e-07	High	2.59572	High	3.62478	High	3.21389	0
	EVWFFGLQYQDTK	3	1	1	P26038		1660.8	94744.7	371250	364497	0	6.367e-06	High	2.47347	High	3.08041	High	3.31953	0
	TANDMIHAENMR	4	1	1	P26038		1402.62	534307	134416	124064	0	0.0002971	High	2.1652	High	2.54522	High	3.34809	0
	TAMSTPHVAEPAENEQDEQDENGAEASADLR	1	1	1	P26038		3312.42	0	0	0	0	0.005997	High	1.89906					0
	VTTMDAELEFAIQPNTTGK	7	3	3	P15311;P26038;P35241		2066.02	0	2.16976e+06	1.97262e+06	0	4.347e-06			High	4.55386	High	4.20706	0
	QRIDEFESM	3	1	1	P26038		1154.52	0	2.42424e+06	2.50231e+06	0	0.002424			High	2.85346	High	2.66889	1
	ESEAVEWQQK	3	1	1	P26038		1233.57	0	283408	423271	0	6.29e-05			High	2.85219	High	3.34253	0
	RKPDTIEVQQMK	5	3	3	P15311;P26038;P35241	M11(Oxidation)	1488.79	0	0	0	0	0.0008155			High	2.75395	High	2.35641	1
	KTQEQLALEMAELTAR	2	1	1	P26038		1831.97	0	1.31429e+06	1.20851e+06	0	0.0002388			High	2.68989	High	3.10627	1
	VTTMDAELEFAIQPNTTGK	1	3	3	P15311;P26038;P35241	M4(Oxidation)	2082.01	0	0	245133	0	0.007896					High	2.22135	0
	ALTSELANAR	1	1	1	P26038		1045.57	477498	0	0	0.001	0.009963	High	2.46502					0
	VLEQHKLNKDQWEER	1	1	1	P26038		1952	89377.1	0	0	0.003	0.04867	High	1.74974					2
	ALTSELANARDESKK	1	1	1	P26038		1632.86	360946	0	0	0.003	0.04663	High	1.16726					2
	KAQQELEEQTRR	1	1	1	P26038		1515.79	0	0	3.34936e+06	0.003	0.03501					High	3.06865	2
	TAMSTPHVAEPAENEQDEQDENGAEASADLRADAMAK	1	1	1	P26038		3899.7	0	741170	0	0.008	0.09017			High	1.98803			1
P63104	14-3-3 protein zeta/delta OS=Homo sapiens OX=9606 GN=YWHAZ PE=1 SV=1 - [1433Z_HUMAN]	54.29	1	9	10	44	2.26615e+06	6.13457e+06	6.74441e+06	43.6325	44.9	9	15	49.2522	54.29	10	17	39.901	41.63	8	12	245	27.7277	4.79248
	Sequence	# PSMs	# Proteins	# Protein Groups	Protein Group Accessions	Modifications	MH+ [Da]	A5: Area	B5: Area	C5: Area	q-Value	PEP	A2	XCorr A2	B2	XCorr B2	C2	XCorr C2	# Missed Cleavages
	LAEQAERYDDMAACMK	4	1	1	P63104	C14(Carbamidomethyl)	1901.83	360428	2.17402e+06	2.31861e+06	0	3.635e-08	High	5.33097	High	3.6837	High	4.27346	1
	SVTEQGAELSNEER	8	1	1	P63104		1548.72	917981	2.94775e+06	3.27872e+06	0	1.36e-08	High	5.11931	High	4.65203	High	4.79738	0
	GIVDQSQQAYQEAFEISK	6	1	1	P63104		2040.99	355464	697321	655458	0	1.297e-10	High	5.06872	High	5.47559	High	4.7753	0
	DSTLIMQLLR	3	6	6	P31946;P62258;Q04917;P27348;P63104;P61981		1189.66	296224	1.20553e+06	1.35039e+06	0	4.773e-06	High	3.5249	High	3.8671	High	3.8267	0
	GIVDQSQQAYQEAFEISKK	4	1	1	P63104		2169.09	2.61941e+06	6.60421e+06	7.45529e+06	0	0.00103	High	3.06888	High	2.04242	High	2.83995	1
	TAFDEAIAELDTLSEESYK	3	1	1	P63104		2131.99	0	540070	444781	0	0.0002202	High	2.59653	High	1.53386	High	1.79945	0
	FLIPNASQAESK	4	1	1	P63104		1304.69	3.10174e+06	8.85175e+06	9.49923e+06	0	0.0005351	High	2.36366	High	2.61718	High	2.78293	0
	SVTEQGAELSNEERNLLSVAYK	3	1	1	P63104		2437.23	1.07729e+06	2.5071e+06	0	0	0.002645	High	2.16172	High	2.67529			1
	YLAEVAAGDDKK	8	1	1	P63104		1279.65	0	213403	514942	0	7.639e-05	High	1.96928	High	3.35358	High	3.36657	1
	DNLTLWTSDTQGDEAEAGEGGEN	1	1	1	P63104		2409	0	281772	0	0	0.004476			High	1.13322			0
Q15019	Septin-2 OS=Homo sapiens OX=9606 GN=SEPT2 PE=1 SV=1 - [SEPT2_HUMAN]	54.29	1	13	13	45	1.06019e+06	2.3358e+06	2.70599e+06	55.0879	47.92	12	18	47.085	54.02	11	13	43.6861	54.02	11	14	361	41.4613	6.59521
	Sequence	# PSMs	# Proteins	# Protein Groups	Protein Group Accessions	Modifications	MH+ [Da]	A5: Area	B5: Area	C5: Area	q-Value	PEP	A2	XCorr A2	B2	XCorr B2	C2	XCorr C2	# Missed Cleavages
	LTVVDTPGYGDAINCR	4	1	1	Q15019	C15(Carbamidomethyl)	1750.85	294957	799868	759636	0	3.356e-09	High	4.92959	High	4.67075	High	4.23382	0
	GRLYPWGVVEVENPEHNDFLK	4	1	1	Q15019		2498.26	588905	416619	593777	0	5.817e-08	High	4.58151	High	3.00799	High	3.39656	1
	TIISYIDEQFER	4	1	1	Q15019		1513.75	798229	799547	985047	0	6.576e-07	High	4.13444	High	3.82268	High	4.11318	0
	ASIPFSVVGSNQLIEAK	6	1	1	Q15019		1759.96	1.52189e+06	3.55427e+06	3.7814e+06	0	2.203e-07	High	4.10736	High	4.25028	High	4.07048	0
	KVENEDMNKDQILLEK	4	1	1	Q15019		1946	238950	695298	763965	0	7.364e-07	High	4.0751	High	4.94679	High	4.78784	2
	ILDEIEEHNIK	5	1	1	Q15019		1352.71	458828	2.12212e+06	2.25576e+06	0	7.276e-05	High	3.9219	High	3.95018	High	4.13085	0
	TMLITHMQDLQEVTQDLHYENFR	4	1	1	Q15019		2862.35	277536	496505	2.0808e+06	0	3.255e-07	High	3.76479	High	2.9241	High	2.90538	0
	AIHNKVNIVPVIAK	3	1	1	Q15019		1515.94	356688	895879	897860	0	0.0001185	High	3.4739	High	2.83434	High	2.27162	1
	STLINSLFLTDLYPER	4	1	1	Q15019		1882	387592	894400	911644	0	4.762e-05	High	2.44189	High	3.31258	High	3.40471	0
	QQPTQFINPETPGYVGFANLPNQVHR	3	1	1	Q15019		2952.48	426119	1.331e+06	1.52794e+06	0	0.0004934	High	1.19637	High	3.47795	High	3.20427	0
	MQAQMQMQMQGGDGDGGALGHHV	2	1	1	Q15019		2384	0	750556	790517	0	9.03e-06			High	3.74427	High	3.70294	0
	VNIVPVIAK	1	1	1	Q15019		952.621	860454	0	0	0.004	0.05745	High	2.49248					0
	QQPTQFINPETPGYVGFANLPNQVHRK	1	1	1	Q15019		3080.57	461100	0	0	0.005	0.06996	High	1.54153					1
Q03252	Lamin-B2 OS=Homo sapiens OX=9606 GN=LMNB2 PE=1 SV=4 - [LMNB2_HUMAN]	54.19	1	32	34	132	2.2375e+06	5.71794e+06	6.6537e+06	107.088	43.55	26	37	139.317	51.29	29	45	151.808	43.71	25	50	620	69.9057	5.59229
	Sequence	# PSMs	# Proteins	# Protein Groups	Protein Group Accessions	Modifications	MH+ [Da]	A5: Area	B5: Area	C5: Area	q-Value	PEP	A2	XCorr A2	B2	XCorr B2	C2	XCorr C2	# Missed Cleavages
	MRLESLSYQLSGLQK	7	1	1	Q03252		1752.93	1.32215e+06	4.09073e+06	4.10005e+06	0	8.808e-09	High	5.53494	High	5.32192	High	4.3731	1
	DVMQQQLAEYQELLDVK	7	1	1	Q03252		2050.02	503261	1.09666e+06	1.09404e+06	0	1.252e-10	High	5.39287	High	3.58357	High	2.94904	0
	LESLSYQLSGLQK	4	1	1	Q03252		1465.79	924868	2.54649e+06	2.54175e+06	0	3.957e-09	High	4.5897	High	4.98971	High	4.77114	0
	IRELEEAMAGER	3	1	1	Q03252		1403.69	285417	283446	369202	0	3.212e-05	High	4.14221	High	4.30472	High	3.94558	1
	AGQMVTVWAAGAGVAHSPPSTLVWK	8	1	1	Q03252		2521.31	1.27753e+06	3.76867e+06	3.78746e+06	0	6.187e-06	High	3.94645	High	2.98585	High	3.04525	0
	ALYESELADAR	1	1	1	Q03252		1237.61	603630	0	0	0	7.798e-07	High	3.79197					0
	TVLVNADGEEVAMR	3	1	1	Q03252		1503.75	1.46921e+06	2.10931e+06	1.76728e+06	0	1.864e-08	High	3.59846	High	4.72826	High	4.81351	0
	MAQALEELR	6	1	1	Q03252		1060.55	1.63234e+06	4.65617e+06	5.193e+06	0	1.26e-05	High	3.57614	High	3.96224	High	3.79615	0
	GLESDVAELR	5	1	1	Q03252		1088.56	2.66616e+06	7.57921e+06	8.08204e+06	0	2.235e-05	High	3.50315	High	3.65949	High	3.49889	0
	AGGPATPLSPTR	10	1	1	Q03252		1124.61	1.47063e+06	3.22987e+06	5.0737e+06	0	0.0005518	High	3.49962	High	3.4002	High	3.29712	0
	GQSSWGTGESFR	3	1	1	Q03252		1298.58	584944	1.47566e+06	1.79222e+06	0	6.431e-05	High	3.41136	High	3.46111	High	3.76837	0
	VKDLESLFHR	8	1	1	Q03252		1243.68	1.60233e+06	2.69213e+06	2.84283e+06	0	0.000236	High	3.37747	High	2.85918	High	3.099	1
	SEVELAAALSDKR	3	1	1	Q03252		1388.74	284774	834788	869437	0	2.003e-06	High	3.08587	High	4.37362	High	4.42499	1
	QVLEGEEIAYKFTPK	6	1	1	Q03252		1751.92	1.12724e+06	3.76185e+06	4.15563e+06	0	6.643e-05	High	3.0286	High	2.84363	High	2.08956	1
	LQEKEELRELNDR	4	2	2	P20700;Q03252		1671.87	774710	2.76125e+06	2.96691e+06	0	0.0009229	High	2.90327	High	3.02452	High	3.8962	2
	EQEMTEMRDVMQQQLAEYQELLDVK	6	1	1	Q03252		3084.44	567604	2.21128e+06	2.31842e+06	0	3.894e-06	High	2.86793	High	2.76238	High	4.16204	1
	QVLEGEEIAYK	1	1	1	Q03252		1278.66	606327	0	0	0	0.0006133	High	2.83626					0
	MAQALEELRSQHDEQVR	4	1	1	Q03252		2040	205041	919217	3.67818e+06	0	2.176e-05	High	2.69988	High	3.85566	High	3.74986	1
	LYKLELEQTYQAK	4	1	1	Q03252		1626.88	742258	4.6839e+06	5.12969e+06	0	7.659e-05	High	2.49102	High	3.60263	High	3.24476	1
	AAATMATPLPGR	3	1	1	Q03252		1156.61	0	274164	268158	0	0.001992	High	2.15182	High	3.10771	High	3.09387	0
	ALELENDRLLLK	2	1	1	Q03252		1426.83	2.13815e+06	4.89072e+06	0	0	0.001622	High	1.1938	High	1.7702			1
	CQSLQEELDFRK	2	1	1	Q03252	C1(Carbamidomethyl)	1552.75	0	2.13375e+06	2.14814e+06	0	0.0001174			High	4.23276	High	3.71314	1
	ATSSSSGSLSATGR	10	1	1	Q03252		1268.61	0	0	331628	0	1.766e-05			High	2.57039	High	4.09574	0
	TVLVNADGEEVAMR	1	1	1	Q03252	M13(Oxidation)	1519.74	0	0	280475	0	4.98e-05					High	3.76143	0
	MRLESLSYQLSGLQK	1	1	1	Q03252	M1(Oxidation)	1768.93	0	0	444665	0	0.007225					High	2.70097	1
	LRAELDEVNK	4	1	1	Q03252		1186.65	554997	706552	1.11948e+06	0.001	0.02284	High	2.88232	High	2.98981	High	3.07721	1
	ALYESELADARR	4	1	1	Q03252		1393.71	1.9082e+06	1.30449e+06	6.68604e+06	0.001	0.01732	High	1.33129	High	2.80808	High	2.93952	1
	IRELEEAMAGERDK	2	1	1	Q03252		1646.82	0	743843	692589	0.001	0.007935			High	3.44294	High	3.48511	2
	LELEQTYQAK	2	1	1	Q03252		1222.63	0	1.05142e+06	1.1278e+06	0.001	0.01589			High	3.11434	High	2.98601	0
	KLLEGEEER	1	3	3	P02545;P20700;Q03252		1102.57	0	109060	0	0.001	0.01233			High	2.91836			1
	RLVEVDSSRQQEYDFK	1	1	1	Q03252		1998.99	0	640706	0	0.001	0.01213			High	2.30886			2
	ELEEAMAGER	1	1	1	Q03252		1134.51	0	278812	0	0.002	0.02548			High	2.33303			0
	LRAELDEVNKSAK	2	1	1	Q03252		1472.81	152393	0	722069	0.004	0.04397	High	2.40918			High	2.59009	2
	AASAAREELKEAR	1	1	1	Q03252		1401.75	0	0	0	0.004	0.0438			High	2.67902			2
	EGELTVAQGR	1	1	1	Q03252		1059.54	222631	0	0	0.006	0.07583	High	1.93898					0
	MLDAKEQEMTEMRDVMQQQLAEYQELLDVK	1	1	1	Q03252		3642.71	204165	0	0	0.009	0.11	High	1.27071					2
P61604	10 kDa heat shock protein, mitochondrial OS=Homo sapiens OX=9606 GN=HSPE1 PE=1 SV=2 - [CH10_HUMAN]	53.92	1	6	6	41	5.07775e+06	9.058e+06	9.39922e+06	36.7526	51.96	5	12	40.8756	47.06	5	13	48.5825	47.06	5	16	102	10.9249	8.92432
	Sequence	# PSMs	# Proteins	# Protein Groups	Protein Group Accessions	Modifications	MH+ [Da]	A5: Area	B5: Area	C5: Area	q-Value	PEP	A2	XCorr A2	B2	XCorr B2	C2	XCorr C2	# Missed Cleavages
	VLQATVVAVGSGSK	11	1	1	P61604		1315.76	4.45562e+06	9.98375e+06	1.11185e+07	0	9.502e-11	High	5.38095	High	5.71361	High	4.99041	0
	VVLDDKDYFLFR	13	1	1	P61604		1529.8	5.57572e+06	6.55102e+06	6.30141e+06	0	1.6e-06	High	3.39669	High	4.09145	High	3.83675	1
	GKGGEIQPVSVK	8	1	1	P61604		1198.68	0	369161	637779	0	0.000907			High	3.36527	High	3.31466	1
	GGEIQPVSVK	3	1	1	P61604		1013.56	207996	0	0	0.001	0.006817	High	2.49485	High	2.71158	High	2.65052	0
	VLLPEYGGTK	4	1	1	P61604		1076.6	5.20192e+06	1.06392e+07	1.07777e+07	0.001	0.009274	High	1.91958	High	1.73571	High	1.82617	0
	VVLDDKDYFLFRDGDILGK	2	1	1	P61604		2228.16	725476	0	0	0.002	0.02944	High	2.44931					2
P0C0S5	Histone H2A.Z OS=Homo sapiens OX=9606 GN=H2AFZ PE=1 SV=2 - [H2AZ_HUMAN]	53.91	2	4	5	29	1.13635e+07	3.30458e+07	2.31976e+07	36.2358	48.44	4	14		0			26.7153	31.25	3	9	128	13.5446	10.5796
	Sequence	# PSMs	# Proteins	# Protein Groups	Protein Group Accessions	Modifications	MH+ [Da]	A5: Area	B5: Area	C5: Area	q-Value	PEP	A2	XCorr A2	B2	XCorr B2	C2	XCorr C2	# Missed Cleavages
	VGATAAVYSAAILEYLTAEVLELAGNASK	2	2	1	P0C0S5		2895.54	130630	0	0	0	9.598e-07	High	4.44388					0
	AGLQFPVGR	22	14	4	Q96QV6;P04908;Q16777;P0C0S5		944.533	3.29997e+07	6.55357e+07	6.78496e+07	0	0.0001125	High	3.37155	High	3.33099	High	3.21943	0
	ATIAGGGVIPHIHK	3	2	1	P0C0S5		1370.79	880698	0	613007	0	2.285e-05	High	3.04293			High	3.61859	0
	GDEELDSLIK	1	2	1	P0C0S5		1118.56	210095	0	0	0.003	0.03758	High	2.60789					0
	HLQLAIRGDEELDSLIK	1	2	1	P0C0S5		1950.07	0	0	1.13031e+06	0.005	0.05622					High	2.00362	1
P51858	Hepatoma-derived growth factor OS=Homo sapiens OX=9606 GN=HDGF PE=1 SV=1 - [HDGF_HUMAN]	53.75	1	7	8	40	1.87419e+06	3.90492e+06	5.99252e+06	37.6032	40.42	7	11	46.2577	49.58	7	15	42.2971	49.58	7	14	240	26.7719	4.729
	Sequence	# PSMs	# Proteins	# Protein Groups	Protein Group Accessions	Modifications	MH+ [Da]	A5: Area	B5: Area	C5: Area	q-Value	PEP	A2	XCorr A2	B2	XCorr B2	C2	XCorr C2	# Missed Cleavages
	KGFSEGLWEIENNPTVK	8	1	1	P51858		1947.99	1.63576e+06	4.41352e+06	4.48708e+06	0	1.572e-10	High	6.53327	High	4.41887	High	4.06384	1
	STANKYQVFFFGTHETAFLGPK	6	1	1	P51858		2490.25	2.0826e+06	4.01185e+06	3.96469e+06	0	2.072e-10	High	5.32384	High	3.23412	High	3.66497	1
	GFSEGLWEIENNPTVK	7	1	1	P51858		1819.89	1.35895e+06	3.28611e+06	3.34935e+06	0	1.136e-07	High	4.372	High	4.76951	High	4.11307	0
	IDEMPEAAVK	6	1	1	P51858		1102.55	1.90421e+06	3.2894e+06	4.13041e+06	0	0.000367	High	3.02978	High	3.08149	High	3.1511	0
	EAENPEGEEKEAATLEVERPLPMEVEK	4	1	1	P51858		3053.47	598721	791074	9.36008e+06	0	0.0001061	High	2.94223	High	3.29971	High	3.15753	1
	MKGYPHWPAR	1	3	3	P51858;Q7Z4V5;O75475		1242.62	651845	0	0	0	0.001572	High	2.91917					1
	DLFPYEESKEK	5	1	1	P51858		1384.67	825910	1.55907e+06	1.76308e+06	0	0.002069	High	2.48708	High	2.95878	High	3.17721	1
	GPPQEEEEEEDEEEEATKEDAEAPGIRDHESL	3	1	1	P51858		3623.53	0	1.79491e+06	1.96652e+06	0	0.007866			High	2.59498	High	3.53582	2
P23284	Peptidyl-prolyl cis-trans isomerase B OS=Homo sapiens OX=9606 GN=PPIB PE=1 SV=2 - [PPIB_HUMAN]	53.7	1	10	10	33	1.99128e+06	3.97009e+06	3.97229e+06	48.3079	46.3	9	15	28.0316	40.74	7	9	30.3737	39.81	6	9	216	23.7275	9.40771
	Sequence	# PSMs	# Proteins	# Protein Groups	Protein Group Accessions	Modifications	MH+ [Da]	A5: Area	B5: Area	C5: Area	q-Value	PEP	A2	XCorr A2	B2	XCorr B2	C2	XCorr C2	# Missed Cleavages
	DTNGSQFFITTVK	4	1	1	P23284		1457.73	1.6617e+06	5.38684e+06	5.44314e+06	0	5.784e-08	High	4.70127	High	5.1037	High	5.26999	0
	TVDNFVALATGEK	7	1	1	P23284		1364.71	2.30468e+06	4.49822e+06	4.3353e+06	0	2.095e-07	High	4.39473	High	4.72257	High	4.42185	0
	VIKDFMIQGGDFTR	3	1	1	P23284		1626.83	891524	379135	0	0	2.476e-06	High	4.30572	High	3.22781			1
	HYGPGWVSMANAGK	2	1	1	P23284		1474.69	378931	0	0	0	1.57e-06	High	3.85035					0
	IEVEKPFAIAKE	5	1	1	P23284		1373.77	356742	2.0252e+06	2.13842e+06	0	0.001592	High	3.60448	High	3.2503	High	3.53452	1
	SIYGERFPDENFK	3	1	1	P23284		1601.76	240262	340445	421195	0	0.0008295	High	3.15546	High	3.34556	High	2.48371	1
	VLEGMEVVR	2	1	1	P23284		1031.55	2.00746e+06	0	0	0	6.817e-05	High	3.12708					0
	VIKDFMIQGGDFTRGDGTGGK	4	1	1	P23284		2199.09	960182	1.14739e+06	1.29426e+06	0	4.226e-05	High	2.56139	High	3.91097	High	4.56575	2
	TVDNFVALATGEKGFGYK	1	1	1	P23284		1916.98	87767.4	0	0	0.001	0.007359	High	1.83491					1
	IGDEDVGRVIFGLFGK	1	1	1	P23284		1721.92	0	212681	0	0.003	0.03342			High	1.42027			1
	HYGPGWVSMANAGK	1	1	1	P23284	M9(Oxidation)	1490.69	0	0	109176	0.003	0.03623					High	2.3858	0
P02787	Serotransferrin OS=Homo sapiens OX=9606 GN=TF PE=1 SV=3 - [TRFE_HUMAN]	52.72	1	27	27	101	1.87322e+06	3.24985e+06	3.40017e+06	105.355	39.4	20	34	96.6088	42.55	20	33	97.2369	39.26	19	34	698	77.0136	7.12256
	Sequence	# PSMs	# Proteins	# Protein Groups	Protein Group Accessions	Modifications	MH+ [Da]	A5: Area	B5: Area	C5: Area	q-Value	PEP	A2	XCorr A2	B2	XCorr B2	C2	XCorr C2	# Missed Cleavages
	LCMGSGLNLCEPNNKEGYYGYTGAFR	3	1	1	P02787	C2(Carbamidomethyl); C10(Carbamidomethyl)	2971.32	684412	1.1023e+06	1.15974e+06	0	3.103e-07	High	4.56601	High	3.61031	High	3.14686	1
	TAGWNIPMGLLYNK	6	1	1	P02787		1577.82	2.39454e+06	3.27371e+06	3.74864e+06	0	8.268e-08	High	4.4966	High	4.123	High	3.79478	0
	NLNEKDYELLCLDGTRKPVEEYANCHLAR	2	1	1	P02787	C11(Carbamidomethyl); C25(Carbamidomethyl)	3520.7	781909	0	0	0	1.774e-05	High	4.33913					2
	SAGWNIPIGLLYCDLPEPR	20	1	1	P02787	C13(Carbamidomethyl)	2171.09	1.91674e+06	3.34033e+06	3.24781e+06	0	4.312e-07	High	4.3276	High	3.20458	High	3.42801	0
	CLKDGAGDVAFVK	7	1	1	P02787	C1(Carbamidomethyl)	1379.7	1.12367e+06	3.13551e+06	3.20406e+06	0	1.309e-05	High	4.16719	High	4.69158	High	4.22362	1
	CSTSSLLEACTFR	4	1	1	P02787	C1(Carbamidomethyl); C10(Carbamidomethyl)	1531.69	616847	2.06227e+06	2.19861e+06	0	8.282e-09	High	4.07169	High	4.95767	High	5.00003	0
	CLVEKGDVAFVK	6	1	1	P02787	C1(Carbamidomethyl)	1364.73	938060	1.81502e+06	605766	0	3.701e-05	High	4.02158	High	4.11443	High	4.09077	1
	DSGFQMNQLR	1	1	1	P02787		1195.56	534784	0	0	0	0.0002676	High	3.72217					0
	FDEFFSEGCAPGSK	3	1	1	P02787	C9(Carbamidomethyl)	1577.66	223265	904414	907525	0	4.261e-07	High	3.68634	High	4.57887	High	4.45022	0
	IECVSAETTEDCIAK	3	1	1	P02787	C3(Carbamidomethyl); C12(Carbamidomethyl)	1725.77	192957	837242	839226	0	5.258e-08	High	3.65743	High	4.03321	High	4.9952	0
	MYLGYEYVTAIR	6	1	1	P02787		1478.73	1.30839e+06	2.4252e+06	2.66536e+06	0	7e-08	High	3.55617	High	4.52196	High	4.10278	0
	KPVEEYANCHLAR	3	1	1	P02787	C9(Carbamidomethyl)	1586.78	133139	988885	957826	0	3.256e-06	High	3.10217	High	3.2337	High	3.68169	0
	SKEFQLFSSPHGK	3	1	1	P02787		1491.77	114664	815088	949016	0	0.0001746	High	3.0777	High	3.41182	High	3.50809	1
	DLLFRDDTVCLAK	2	1	1	P02787	C10(Carbamidomethyl)	1565.8	515533	0	0	0	0.002618	High	3.05816					1
	FDEFFSEGCAPGSKK	5	1	1	P02787	C9(Carbamidomethyl)	1705.76	681837	2.67862e+06	2.93689e+06	0	7.858e-05	High	3.04291	High	3.17525	High	2.88856	1
	SETKDLLFRDDTVCLAK	3	1	1	P02787	C14(Carbamidomethyl)	2011.02	224350	1.31666e+06	0	0	3.841e-05	High	2.61229	High	2.27237			2
	HQTVPQNTGGKNPDPWAK	2	1	1	P02787		1974.98	303208	1.34287e+06	0	0	0.0002868	High	2.38796	High	3.09373			1
	LKCDEWSVNSVGK	2	1	1	P02787	C3(Carbamidomethyl)	1521.74	0	167256	144930	0	0.0001297			High	3.89717	High	4.12053	1
	NLNEKDYELLCLDGTR	2	1	1	P02787	C11(Carbamidomethyl)	1952.94	0	1.27563e+06	1.39227e+06	0	0.000569			High	3.71675	High	2.01127	1
	SVIPSDGPSVACVK	4	1	1	P02787	C12(Carbamidomethyl)	1415.72	0	1.97857e+06	2.1744e+06	0	0.003653			High	2.63004	High	2.6428	0
	IMNGEADAMSLDGGFVYIAGK	5	1	1	P02787		2159.02	0	924472	802247	0	2.122e-05			High	2.60332	High	4.10337	0
	WCAVSEHEATK	3	1	1	P02787	C2(Carbamidomethyl)	1317.59	0	72845	107649	0	0.003378			High	2.24322	High	2.38606	0
	SASDLTWDNLK	1	1	1	P02787		1249.61	894713	0	0	0.001	0.0104	High	2.77584					0
	SMGGKEDLIWELLNQAQEHFGK	1	1	1	P02787		2530.24	0	0	0	0.001	0.02145	High	1.11517					1
	KPVDEYKDCHLAQVPSHTVVAR	2	1	1	P02787	C9(Carbamidomethyl)	2549.3	0	820127	732560	0.002	0.02416			High	2.4375	High	2.13979	1
	DSAHGFLKVPPR	1	1	1	P02787		1323.72	0	0	500939	0.002	0.02579					High	2.35837	1
	EGTCPEAPTDECKPVK	1	1	1	P02787	C4(Carbamidomethyl); C12(Carbamidomethyl)	1817.81	369533	0	0	0.004	0.05942	High	1.46265					0
P09936	Ubiquitin carboxyl-terminal hydrolase isozyme L1 OS=Homo sapiens OX=9606 GN=UCHL1 PE=1 SV=2 - [UCHL1_HUMAN]	52.47	1	10	10	33	2.31396e+06	5.9967e+06	6.68178e+06	30.0098	46.19	6	9	34.2957	50.67	8	11	30.1994	52.47	9	13	223	24.8085	5.47803
	Sequence	# PSMs	# Proteins	# Protein Groups	Protein Group Accessions	Modifications	MH+ [Da]	A5: Area	B5: Area	C5: Area	q-Value	PEP	A2	XCorr A2	B2	XCorr B2	C2	XCorr C2	# Missed Cleavages
	CFEKNEAIQAAHDAVAQEGQCR	3	1	1	P09936	C1(Carbamidomethyl); C21(Carbamidomethyl)	2532.14	419293	0	603903	0	4.037e-07	High	5.04043			High	4.25465	1
	NEAIQAAHDAVAQEGQCR	3	1	1	P09936	C17(Carbamidomethyl)	1967.9	503220	1.92698e+06	1.9789e+06	0	2.419e-06	High	4.78098	High	3.26815	High	2.84447	0
	MQLKPMEINPEMLNK	4	1	1	P09936		1815.92	2.80081e+06	5.60423e+06	282516	0	4.832e-07	High	4.60856	High	4.06491	High	2.89768	0
	QIEELKGQEVSPK	6	1	1	P09936		1484.8	1.28746e+06	4.38129e+06	4.52146e+06	0	7.696e-05	High	3.04074	High	3.18959	High	4.05967	1
	QTIGNSCGTIGLIHAVANNQDKLGFEDGSVLK	3	1	1	P09936	C7(Carbamidomethyl)	3356.7	318145	0	7.67191e+06	0	0.00674	High	2.82157			High	2.34711	1
	MPFPVNHGASSEDTLLKDAAK	7	1	1	P09936		2228.1	2.85362e+06	8.00457e+06	7.85197e+06	0	0.0001583	High	2.08701	High	4.16263	High	3.49162	1
	LGFEDGSVLK	2	1	1	P09936		1064.57	0	684511	752652	0	0.0006109			High	3.48737	High	3.21687	0
	QTIGNSCGTIGLIHAVANNQDK	2	1	1	P09936	C7(Carbamidomethyl)	2311.15	0	448062	495308	0	0.00112			High	2.95079	High	2.18916	0
	MPFPVNHGASSEDTLLK	1	1	1	P09936		1842.9	0	1.32058e+06	0	0	0.002384			High	2.63201			0
	QFLSETEKMSPEDR	2	1	1	P09936		1696.79	0	840315	860233	0	0.002789			High	2.11463	High	2.40869	1
Q9H0U4	Ras-related protein Rab-1B OS=Homo sapiens OX=9606 GN=RAB1B PE=1 SV=1 - [RAB1B_HUMAN]	52.24	1	2	7	25	1.19466e+06	2.5952e+06	2.63479e+06	22.5746	34.83	5	7	25.3858	52.24	7	9	25.662	44.78	6	9	201	22.1572	5.73193
	Sequence	# PSMs	# Proteins	# Protein Groups	Protein Group Accessions	Modifications	MH+ [Da]	A5: Area	B5: Area	C5: Area	q-Value	PEP	A2	XCorr A2	B2	XCorr B2	C2	XCorr C2	# Missed Cleavages
	NATNVEQAFMTMAAEIK	5	1	1	Q9H0U4		1868.89	673342	1.38532e+06	1.41541e+06	0	9.625e-08	High	4.05881	High	3.31663	High	2.53135	0
	EFADSLGIPFLETSAK	6	2	2	Q9H0U4;P62820		1724.88	981692	2.21359e+06	2.23812e+06	0	1.478e-05	High	4.03506	High	3.3247	High	3.25908	0
	LLLIGDSGVGK	4	3	3	Q9H0U4;P61026;P62820		1071.64	1.92893e+06	3.80656e+06	3.87867e+06	0	3.447e-06	High	3.21067	High	2.82183	High	2.95866	0
	LQIWDTAGQER	3	6	6	P61106;P62820;Q9H0U4;P20338;P20340;P61026		1316.66	515671	1.10619e+06	1.21477e+06	0	0.003131	High	2.86327	High	3.53393	High	2.98013	0
	MGPGAASGGERPNLK	2	1	1	Q9H0U4		1441.72	154333	102023	0	0	0.0008658	High	2.71348	High	2.3294			0
	QWLQEIDRYASENVNK	2	2	2	Q9H0U4;P62820		1992.98	0	1.76545e+06	1.78756e+06	0	0.003604			High	2.48059	High	3.0678	1
	NATNVEQAFMTMAAEIK	1	1	1	Q9H0U4	M10(Oxidation)	1884.89	0	0	1.10611e+06	0	5.125e-06					High	3.54787	0
	FADDTYTESYISTIGVDFK	2	2	2	P62820;Q9H0U4		2172	0	279722	212395	0.001	0.01351			High	1.7905	High	1.72093	0
P84243	Histone H3.3 OS=Homo sapiens OX=9606 GN=H3F3A PE=1 SV=2 - [H33_HUMAN]	52.21	1	8	8	75	2.20852e+07	3.18411e+07	4.32344e+07	55.6997	50	7	31	58.7321	42.65	6	23	57.9821	40.44	4	21	136	15.3185	11.2681
	Sequence	# PSMs	# Proteins	# Protein Groups	Protein Group Accessions	Modifications	MH+ [Da]	A5: Area	B5: Area	C5: Area	q-Value	PEP	A2	XCorr A2	B2	XCorr B2	C2	XCorr C2	# Missed Cleavages
	FQSAAIGALQEASEAYLVGLFEDTNLCAIHAK	19	1	1	P84243	C27(Carbamidomethyl)	3437.71	5.70427e+06	1.70078e+07	2.13154e+07	0	2.182e-06	High	4.32381	High	3.7138	High	3.80402	0
	EIAQDFKTDLR	16	1	1	P84243		1335.69	3.08575e+07	5.61111e+07	5.96089e+07	0	0.0003103	High	3.21162	High	3.48758	High	3.58827	1
	YRPGTVALR	32	1	1	P84243		1032.6	2.96939e+07	2.24044e+07	4.8779e+07	0	0.0005436	High	3.02049	High	3.35678	High	3.31018	0
	VTIMPKDIQLAR	1	1	1	P84243		1384.8	144736	0	0	0	0.004146	High	2.48456					1
	LVREIAQDFK	2	1	1	P84243		1218.68	81992.3	298144	0	0	0.005744	High	1.95471	High	2.47911			1
	LVREIAQDFKTDLR	2	1	1	P84243		1703.95	93385.2	587813	0	0	0.004186	High	1.65468	High	2.61035			2
	FQSAAIGALQEASEAYLVGLFEDTNLCAIHAKR	1	1	1	P84243	C27(Carbamidomethyl)	3593.81	177300	0	0	0	0.001343	High	1.32805					1
	YRPGTVALREIR	2	1	1	P84243		1430.82	0	1.34185e+06	1.43729e+06	0.005	0.06052			High	2.31053	High	2.34294	1
P08708	40S ribosomal protein S17 OS=Homo sapiens OX=9606 GN=RPS17 PE=1 SV=2 - [RS17_HUMAN]	51.85	1	4	4	32	1.43321e+06	3.37415e+06	3.56398e+06	34.3043	51.85	4	12	17.593	23.7	2	10	24.2584	51.85	4	10	135	15.5404	9.84717
	Sequence	# PSMs	# Proteins	# Protein Groups	Protein Group Accessions	Modifications	MH+ [Da]	A5: Area	B5: Area	C5: Area	q-Value	PEP	A2	XCorr A2	B2	XCorr B2	C2	XCorr C2	# Missed Cleavages
	LLDFGSLSNLQVTQPTVGMNFK	12	1	1	P08708		2409.25	1.6315e+06	4.32493e+06	4.09508e+06	0	5.358e-06	High	4.30621	High	3.38366	High	3.14707	0
	LLDFGSLSNLQVTQPTVGMNFK	7	1	1	P08708	M19(Oxidation)	2425.24	926166	1.90983e+06	1.82048e+06	0	1.664e-07	High	3.9358	High	2.59422	High	3.17914	0
	VCEEIAIIPSKK	2	1	1	P08708	C2(Carbamidomethyl)	1386.77	365499	0	389088	0	1.753e-05	High	3.63909			High	3.63358	1
	IAGYVTHLMK	7	1	1	P08708		1132.62	1.48368e+06	2.42337e+06	2.64087e+06	0	0.0002788	High	3.54381	High	2.30382	High	2.23666	0
	DNYVPEVSALDQEIIEVDPDTKEMLK	4	1	1	P08708		2990.46	1.18443e+06	0	3.95598e+06	0	0.001263	High	2.83096			High	2.05391	1
P05386	60S acidic ribosomal protein P1 OS=Homo sapiens OX=9606 GN=RPLP1 PE=1 SV=1 - [RLA1_HUMAN]	51.75	1	2	2	23	4.57001e+06	7.51786e+06	7.94148e+06	29.9386	51.75	2	9	19.589	51.75	2	7	16.4051	51.75	2	7	114	11.5067	4.32275
	Sequence	# PSMs	# Proteins	# Protein Groups	Protein Group Accessions	Modifications	MH+ [Da]	A5: Area	B5: Area	C5: Area	q-Value	PEP	A2	XCorr A2	B2	XCorr B2	C2	XCorr C2	# Missed Cleavages
	ALANVNIGSLICNVGAGGPAPAAGAAPAGGPAPSTAAAPAEEK	7	1	1	P05386	C12(Carbamidomethyl)	3808.94	2.54194e+06	2.82686e+06	2.87197e+06	0	2.308e-10	High	5.90492	High	3.97962	High	2.55508	0
	AAGVNVEPFWPGLFAK	16	1	1	P05386		1702.9	6.59808e+06	1.22089e+07	1.3011e+07	0	2.756e-06	High	4.41312	High	4.20003	High	3.79288	0
P63167	Dynein light chain 1, cytoplasmic OS=Homo sapiens OX=9606 GN=DYNLL1 PE=1 SV=1 - [DYL1_HUMAN]	51.69	1	3	3	15	728488	1.03373e+06	2.03639e+06	19.64	51.69	3	5	13.1941	51.69	3	5	13.2924	51.69	3	5	89	10.3591	7.40088
	Sequence	# PSMs	# Proteins	# Protein Groups	Protein Group Accessions	Modifications	MH+ [Da]	A5: Area	B5: Area	C5: Area	q-Value	PEP	A2	XCorr A2	B2	XCorr B2	C2	XCorr C2	# Missed Cleavages
	NADMSEEMQQDSVECATQALEK	5	1	1	P63167	C15(Carbamidomethyl)	2514.05	1.33317e+06	1.34436e+06	1.2305e+06	0	1.427e-12	High	6.64294	High	4.7048	High	4.35576	0
	YNIEKDIAAHIKK	5	1	1	P63167		1542.87	321119	1.22059e+06	1.353e+06	0	0.003037	High	2.86918	High	2.81641	High	3.00298	2
	YNPTWHCIVGR	5	1	1	P63167	C7(Carbamidomethyl)	1402.67	531172	536235	3.52567e+06	0	0.0001968	High	2.28185	High	3.41001	High	3.15516	0
P35268	60S ribosomal protein L22 OS=Homo sapiens OX=9606 GN=RPL22 PE=1 SV=2 - [RL22_HUMAN]	51.56	1	4	4	11	1.24021e+06	1.79934e+06	1.88121e+06		0			17.8642	51.56	4	5	15.9385	51.56	4	6	128	14.7778	9.18799
	Sequence	# PSMs	# Proteins	# Protein Groups	Protein Group Accessions	Modifications	MH+ [Da]	A5: Area	B5: Area	C5: Area	q-Value	PEP	A2	XCorr A2	B2	XCorr B2	C2	XCorr C2	# Missed Cleavages
	AGNLGGGVVTIER	4	1	1	P35268		1242.68	0	3.53246e+06	3.7734e+06	0	6.611e-08			High	4.80445	High	4.39138	0
	YFQINQDEEEEEDED	2	1	1	P35268		1931.73	0	430835	384107	0	5.784e-08			High	3.78103	High	3.4963	0
	FTLDCTHPVEDGIMDAANFEQFLQER	3	1	1	P35268	C5(Carbamidomethyl)	3083.39	0	293668	315865	0	0.0003673			High	2.66632	High	2.38233	0
	ITVTSEVPFSKR	2	1	1	P35268		1363.76	0	1.43472e+06	1.48614e+06	0	0.003629			High	2.53721	High	2.23973	1
P62888	60S ribosomal protein L30 OS=Homo sapiens OX=9606 GN=RPL30 PE=1 SV=2 - [RL30_HUMAN]	51.3	1	5	5	15	535786	1.09826e+06	1.10489e+06	18.2924	34.78	4	5	23.5635	51.3	5	6	16.3432	34.78	3	4	115	12.7757	9.62744
	Sequence	# PSMs	# Proteins	# Protein Groups	Protein Group Accessions	Modifications	MH+ [Da]	A5: Area	B5: Area	C5: Area	q-Value	PEP	A2	XCorr A2	B2	XCorr B2	C2	XCorr C2	# Missed Cleavages
	VCTLAIIDPGDSDIIR	4	1	1	P62888	C2(Carbamidomethyl)	1757.92	719693	1.4681e+06	1.60883e+06	0	4.531e-07	High	4.66818	High	4.54252	High	4.33593	0
	KSEIEYYAMLAK	5	1	1	P62888		1445.74	0	309885	372239	0	6.621e-06	High	4.13782	High	4.46855	High	4.39329	1
	LVILANNCPALR	3	1	1	P62888	C8(Carbamidomethyl)	1353.77	806153	1.51679e+06	1.3336e+06	0	8.275e-07	High	3.567	High	4.16712	High	4.05477	0
	SEIEYYAMLAK	2	1	1	P62888		1317.64	81511.5	290089	0	0	1.338e-05	High	2.38609	High	3.91145			0
	TGVHHYSGNNIELGTACGK	1	1	1	P62888	C17(Carbamidomethyl)	2014.95	0	210905	0	0	0.005851			High	2.82965			0
Q14195	Dihydropyrimidinase-related protein 3 OS=Homo sapiens OX=9606 GN=DPYSL3 PE=1 SV=1 - [DPYL3_HUMAN]	51.05	1	16	18	82	2.51037e+06	6.78962e+06	7.29891e+06	95.0461	50	17	30	91.7223	41.93	16	26	94.7731	46.84	16	26	570	61.9241	6.49365
	Sequence	# PSMs	# Proteins	# Protein Groups	Protein Group Accessions	Modifications	MH+ [Da]	A5: Area	B5: Area	C5: Area	q-Value	PEP	A2	XCorr A2	B2	XCorr B2	C2	XCorr C2	# Missed Cleavages
	NLHQSGFSLSGTQVDEGVR	5	1	1	Q14195		2030.99	1.46364e+06	3.39366e+06	3.6779e+06	0	2.918e-09	High	5.66803	High	4.48628	High	5.06054	0
	MDENQFVAVTSTNAAK	9	2	2	Q16555;Q14195		1725.82	2.98551e+06	8.60123e+06	9.19849e+06	0	8.864e-07	High	5.47967	High	5.58974	High	5.671	0
	ISVGSDSDLVIWDPDAVK	6	1	1	Q14195		1915.97	627782	1.11563e+06	1.13794e+06	0	4.182e-06	High	4.78051	High	3.05662	High	4.22735	0
	GMYDGPVFDLTTTPK	9	1	1	Q14195		1641.78	2.46195e+06	6.95328e+06	7.6039e+06	0	3.496e-08	High	4.64259	High	5.1565	High	4.58673	0
	AITIASQTNCPLYVTK	5	1	1	Q14195	C10(Carbamidomethyl)	1779.94	980306	2.53336e+06	2.58008e+06	0	1.434e-07	High	4.5577	High	4.70859	High	5.03229	0
	IMLEDGNLHVTQGAGR	4	1	1	Q14195		1710.86	1.48185e+06	4.81435e+06	5.09432e+06	0	1.805e-09	High	4.33335	High	2.72284	High	2.50628	0
	SAADLISQAR	6	1	1	Q14195		1031.55	1.2656e+06	2.89037e+06	3.51299e+06	0	6.552e-06	High	4.27642	High	3.96644	High	4.0119	0
	GAPLVVICQGK	4	1	1	Q14195	C8(Carbamidomethyl)	1141.64	696308	1.78281e+06	2.01906e+06	0	1.516e-05	High	3.83759	High	4.14713	High	4.35002	0
	GMTTVDDFFQGTK	3	1	1	Q14195		1446.66	1.00539e+06	2948110	3.14822e+06	0	1.235e-05	High	3.61337	High	4.36965	High	4.18047	0
	IVNDDQSFYADIYMEDGLIK	6	2	2	Q16555;Q14195		2349.1	197643	1.34149e+06	1.11397e+06	0	2.703e-09	High	3.20259	High	4.06584	High	3.79855	0
	AALAGGTTMIIDHVVPEPESSLTEAYEK	4	1	1	Q14195		2929.45	521039	234009	1.14318e+06	0	0.004494	High	3.14569	High	1.47561	High	2.91564	0
	MDENQFVAVTSTNAAK	3	2	2	Q16555;Q14195	M1(Oxidation)	1741.81	48004.1	198687	206186	0	6.525e-06	High	3.11649	High	2.5946	High	4.07252	0
	KKGNVVFGEPITASLGIDGTHYWSK	2	1	1	Q14195		2704.41	836153	0	1.14871e+06	0	6.151e-05	High	3.00412			High	2.94936	2
	DNFTAIPEGTNGVEER	3	1	1	Q14195		1748.81	316492	816113	823175	0	0.0001204	High	2.80359	High	3.64037	High	3.71015	0
	AIGKDNFTAIPEGTNGVEER	3	1	1	Q14195		2118.04	1.10456e+06	2.24083e+06	2.32376e+06	0	0.0001437	High	2.55954	High	3.92187	High	2.99213	1
	QIGDNLIVPGGVK	4	1	1	Q14195		1309.75	1.86511e+06	4738325	4.8517e+06	0	3.581e-05	High	2.08403	High	3.21533	High	3.43298	0
	MLEMGITGPEGHVLSRPEELEAEAVFR	2	1	1	Q14195		2997.48	795683	0	1.98499e+06	0	0.002037	High	1.61076			High	1.84143	0
	MVIPGGIDVHTHFQMPYK	3	1	1	Q14195		2070.04	2.08365e+06	2.06447e+06	0	0	0.004153	High	1.52398	High	1.65626			0
	AVATGKMDENQFVAVTSTNAAK	1	1	1	Q14195		2253.12	0	254073	0	0	0.0002369			High	3.53012			1
P07737	Profilin-1 OS=Homo sapiens OX=9606 GN=PFN1 PE=1 SV=2 - [PROF1_HUMAN]	50.71	1	6	6	25	2.102e+06	4.78808e+06	4.67286e+06	25.4045	50.71	6	9	27.7341	50.71	6	9	26.9583	50.71	6	7	140	15.0446	8.26514
	Sequence	# PSMs	# Proteins	# Protein Groups	Protein Group Accessions	Modifications	MH+ [Da]	A5: Area	B5: Area	C5: Area	q-Value	PEP	A2	XCorr A2	B2	XCorr B2	C2	XCorr C2	# Missed Cleavages
	SSFYVNGLTLGGQK	5	1	1	P07737		1470.76	1.52296e+06	4.71034e+06	4.46278e+06	0	1.089e-07	High	4.38164	High	4.58983	High	4.77266	0
	TFVNITPAEVGVLVGKDR	5	1	1	P07737		1915.07	3.73652e+06	7.65278e+06	7.62954e+06	0	0.0001474	High	3.6115	High	2.05409	High	2.1843	1
	STGGAPTFNVTVTK	4	1	1	P07737		1379.72	1.04653e+06	2.00111e+06	1.92627e+06	0	6.721e-06	High	3.31818	High	3.67718	High	4.40272	0
	DSLLQDGEFSMDLR	3	1	1	P07737		1625.75	333570	928136	869523	0	3.392e-08	High	3.18243	High	4.18632	High	4.54765	0
	TFVNITPAEVGVLVGK	5	1	1	P07737		1643.94	868930	1.23132e+06	1.22777e+06	0	1.299e-06	High	2.91807	High	3.03233	High	3.81299	0
	TDKTLVLLMGK	3	1	1	P07737		1218.72	332316	602464	605626	0	0.0005474	High	2.77262	High	2.50025	High	2.51354	1
P09493	Tropomyosin alpha-1 chain OS=Homo sapiens OX=9606 GN=TPM1 PE=1 SV=2 - [TPM1_HUMAN]	50.35	1	6	16	107	5.1242e+06	1.58511e+07	1.71761e+07	93.6845	29.58	12	32	107.831	43.31	13	37	111.181	44.01	14	38	284	32.6887	4.7417
	Sequence	# PSMs	# Proteins	# Protein Groups	Protein Group Accessions	Modifications	MH+ [Da]	A5: Area	B5: Area	C5: Area	q-Value	PEP	A2	XCorr A2	B2	XCorr B2	C2	XCorr C2	# Missed Cleavages
	LATALQKLEEAEKAADESER	10	4	4	P09493;P06753;P67936;P07951		2202.13	3.76033e+06	1.14071e+07	1.28068e+07	0	6.447e-10	High	5.54715	High	4.12609	High	4.38962	2
	IQLVEEELDRAQER	11	4	4	P09493;P07951;P06753;P67936		1727.9	9.21471e+06	2.97841e+07	3.19915e+07	0	0.0001925	High	4.17443	High	4.34421	High	4.10605	1
	AQKDEEKMEIQEIQLK	7	1	1	P09493		1960.01	1.21087e+06	4.91832e+06	5.12299e+06	0	1.468e-06	High	4.15623	High	3.83697	High	4.84176	2
	RIQLVEEELDRAQER	4	4	4	P09493;P07951;P06753;P67936		1884	2.39755e+06	6.36225e+06	6.72987e+06	0	0.0005253	High	3.9475	High	3.99909	High	3.97436	2
	LATALQKLEEAEK	10	4	4	P09493;P07951;P06753;P67936		1443.81	1.02362e+06	3.37051e+06	3.74723e+06	0	0.001365	High	3.92021	High	4.41534	High	3.63657	1
	KLVIIESDLER	5	1	1	P09493		1314.76	232469	3.76336e+06	3.85431e+06	0	2.449e-05	High	3.61746	High	3.39992	High	3.87108	1
	LEEAEKAADESER	37	4	4	P09493;P07951;P06753;P67936		1476.69	976989	5138938	5.72514e+06	0	3.492e-08	High	3.55318	High	5.20364	High	5.02066	1
	IQLVEEELDR	5	4	4	P09493;P07951;P06753;P67936		1243.66	1.32724e+06	3.9944e+06	4.2921e+06	0	9.629e-06	High	3.04261	High	3.70456	High	3.64228	0
	LEEAEKAADESERGMK	3	4	4	P09493;P06753;P67936;P07951		1792.84	209563	863607	919716	0	0.004293	High	2.92532	High	3.23593	High	3.65787	2
	HIAEDADRKYEEVAR	5	1	1	P09493		1801.88	795779	942729	5.71919e+06	0	3.691e-05	High	2.86941	High	2.02404	High	2.60779	2
	KLVIIESDLERAEER	2	1	1	P09493		1799.99	642154	0	0	0	0.002192	High	2.8569					2
	RIQLVEEELDR	2	3	3	P09493;P06753;P67936		1399.76	322788	0	311781	0	0.0004321	High	2.18152			High	3.70252	1
	ATDAEADVASLNR	2	2	2	P09493;P07951		1332.64	0	177026	201336	0	0.001222			High	3.32	High	3.57248	0
	AISEELDHALNDMTSI	2	2	2	P09493;P06753		1758.82	0	1.31557e+06	1.34601e+06	0	0.0002548			High	2.59399	High	3.07396	0
	SKQLEDELVSLQKK	1	1	1	P09493		1644.92	0	343965	0	0.005	0.06229			High	2.43222			2
	CAELEEELKTVTNNLK	1	1	1	P09493	C1(Carbamidomethyl)	1890.95	0	0	0	0.007	0.08608					High	2.16637	1
P02794	Ferritin heavy chain OS=Homo sapiens OX=9606 GN=FTH1 PE=1 SV=2 - [FRIH_HUMAN]	50.27	1	5	5	10	234731	1.54732e+06	1.31607e+06	8.47563	37.16	4	4	6.1286	26.23	3	4	0	13.11	2	2	183	21.2123	5.5542
	Sequence	# PSMs	# Proteins	# Protein Groups	Protein Group Accessions	Modifications	MH+ [Da]	A5: Area	B5: Area	C5: Area	q-Value	PEP	A2	XCorr A2	B2	XCorr B2	C2	XCorr C2	# Missed Cleavages
	MGAPESGLAEYLFDK	1	1	1	P02794		1627.77	138592	0	0	0	0.0001854	High	3.7438					0
	NVNQSLLELHK	3	1	1	P02794		1294.71	270206	1.85036e+06	2.13634e+06	0	0.005265	High	2.47886	High	1.48812	High	1.98291	0
	IFLQDIKKPDCDDWESGLNAMECALHLEK	1	1	1	P02794	C11(Carbamidomethyl); C23(Carbamidomethyl)	3475.63	295396	0	0	0	0.0005299	High	2.37715					1
	AIKELGDHVTNLR	4	1	1	P02794		1465.81	0	606125	495793	0	0.005361	High	2.25297	High	3.62848	High	2.17946	1
	LATDKNDPHLCDFIETHYLNEQVK	1	1	1	P02794	C11(Carbamidomethyl)	2900.39	0	2.18549e+06	0	0.001	0.006425			High	1.97095			1
O75367	Core histone macro-H2A.1 OS=Homo sapiens OX=9606 GN=H2AFY PE=1 SV=4 - [H2AY_HUMAN]	50	1	14	16	129	1.20658e+07	25298245	2.57896e+07	152.214	50	16	46	133.542	50	14	38	144.175	50	14	45	372	39.5925	9.78857
	Sequence	# PSMs	# Proteins	# Protein Groups	Protein Group Accessions	Modifications	MH+ [Da]	A5: Area	B5: Area	C5: Area	q-Value	PEP	A2	XCorr A2	B2	XCorr B2	C2	XCorr C2	# Missed Cleavages
	HILLAVANDEELNQLLK	12	2	2	Q9P0M6;O75367		1933.08	3.00341e+06	6.78856e+06	7.01284e+06	0	1.79e-11	High	6.0866	High	4.75819	High	3.34915	0
	NGPLEVAGAAVSAGHGLPAK	18	1	1	O75367		1815.97	1.23098e+07	3.07857e+07	31402816	0	4.424e-11	High	5.89154	High	5.62509	High	5.63678	0
	FVIHCNSPVWGADKCEELLEK	9	1	1	O75367	C5(Carbamidomethyl); C15(Carbamidomethyl)	2531.21	9.39106e+06	1.91359e+07	1.94851e+07	0	4.299e-08	High	5.17438	High	5.57541	High	6.00559	1
	GVTIASGGVLPNIHPELLAK	14	1	1	O75367		1986.14	1.44967e+07	2.59732e+07	2.64808e+07	0	1.968e-08	High	4.76224	High	3.59766	High	3.74989	0
	AASADSTTEGTPADGFTVLSTK	14	1	1	O75367		2127.01	3.56636e+06	1.12338e+07	1.15311e+07	0	4.451e-10	High	4.56556	High	5.29417	High	6.31378	0
	KKNGPLEVAGAAVSAGHGLPAK	6	1	1	O75367		2072.16	1.79598e+06	7.86038e+06	8.65237e+06	0	0.0001617	High	4.18833	High	4.33807	High	4.17679	2
	GKLEAIITPPPAK	7	1	1	O75367		1334.81	750052	1.47096e+06	0	0	2.758e-05	High	4.12653	High	4.08081	High	4.61822	1
	GKLEAIITPPPAKK	9	1	1	O75367		1462.9	2.67708e+06	6.84731e+06	7.5872e+06	0	0.0005604	High	3.34018	High	3.35196	High	3.35102	2
	KNGPLEVAGAAVSAGHGLPAK	1	1	1	O75367		1944.07	401114	0	0	0	5.652e-05	High	3.29902					1
	SIAFPSIGSGR	13	1	1	O75367		1091.58	4.01492e+06	1.04791e+07	1.15337e+07	0	5.12e-06	High	3.10085	High	3.07521	High	3.39466	0
	GGKEFVEAVLELR	1	1	1	O75367		1446.8	105874	0	0	0	8.216e-05	High	3.03507					1
	NCLALADDKKLK	5	1	1	O75367	C2(Carbamidomethyl)	1388.76	367049	228553	2.97577e+06	0	0.0009505	High	2.98069	High	3.295	High	3.29264	2
	KGGKEFVEAVLELR	3	1	1	O75367		1574.89	225291	406519	463355	0	0.002245	High	2.66938	High	3.04233	High	2.63646	2
	AGVIFPVGR	7	2	2	Q9P0M6;O75367		915.543	6.88804e+06	1.18322e+07	1.24541e+07	0	0.0008176	High	2.62656	High	2.48928	High	2.23388	0
	AISSYFVSTMSSSIK	4	1	1	O75367		1607.8	290227	856410	831622	0	1.798e-07	High	2.6174	High	4.69877	High	4.80332	0
	QTAAQLILK	6	1	1	O75367		985.607	909887	1.69607e+06	2.21869e+06	0.001	0.01179	High	1.74164	High	2.49104	High	2.5363	0
P32119	Peroxiredoxin-2 OS=Homo sapiens OX=9606 GN=PRDX2 PE=1 SV=5 - [PRDX2_HUMAN]	50	1	9	10	48	6.98719e+06	1.44965e+07	1.47812e+07	45.2438	50	8	17	41.4851	30.3	9	16	43.3916	30.3	7	15	198	21.8782	5.97314
	Sequence	# PSMs	# Proteins	# Protein Groups	Protein Group Accessions	Modifications	MH+ [Da]	A5: Area	B5: Area	C5: Area	q-Value	PEP	A2	XCorr A2	B2	XCorr B2	C2	XCorr C2	# Missed Cleavages
	KEGGLGPLNIPLLADVTR	7	1	1	P32119		1863.07	1.59321e+06	3.57398e+06	3.56173e+06	0	8.542e-07	High	4.84749	High	3.74423	High	3.43297	1
	RLSEDYGVLKTDEGIAYR	5	1	1	P32119		2085.06	472458	1.36105e+06	1.40769e+06	0	3.777e-06	High	4.44753	High	3.77508	High	3.93106	2
	LSEDYGVLKTDEGIAYR	5	1	1	P32119		1928.97	1.37666e+06	4.47517e+06	4.47901e+06	0	1.33e-06	High	3.72115	High	3.77683	High	4.10492	1
	ATAVVDGAFKEVK	7	1	1	P32119		1334.73	2.47337e+06	1.60278e+06	1.88577e+06	0	7.75e-06	High	3.56531	High	4.42089	High	3.82429	1
	EGGLGPLNIPLLADVTR	7	1	1	P32119		1734.97	529536	1.64971e+06	1.82666e+06	0	4.486e-06	High	3.48237	High	2.87743	High	3.3478	0
	QITVNDLPVGR	10	2	2	Q06830;P32119		1211.68	1.43821e+07	3.54404e+07	3.63029e+07	0	1.416e-05	High	3.12329	High	3.37999	High	3.45083	0
	KEGGLGPLNIPLLADVTRR	2	1	1	P32119		2019.17	1.14769e+06	2.36351e+06	0	0	0.003643	High	2.75227	High	1.87546			2
	LVQAFQYTDEHGEVCPAGWKPGSDTIKPNVDDSKEYFSK	2	1	1	P32119	C15(Carbamidomethyl)	4443.1	4.10606e+06	0	0	0	0.0009114	High	1.90592					1
	LSEDYGVLK	2	1	1	P32119		1023.54	0	0	0	0	0.0005894			High	3.19885	High	2.84342	0
	RLSEDYGVLK	1	1	1	P32119		1179.64	0	524822	0	0.003	0.03227			High	2.97701			1
Q07955	Serine/arginine-rich splicing factor 1 OS=Homo sapiens OX=9606 GN=SRSF1 PE=1 SV=2 - [SRSF1_HUMAN]	50	1	13	13	114	2.56251e+06	6.73813e+06	6.39023e+06	75.4299	45.97	10	31	111.502	50	12	40	115.766	50	13	43	248	27.7278	10.3599
	Sequence	# PSMs	# Proteins	# Protein Groups	Protein Group Accessions	Modifications	MH+ [Da]	A5: Area	B5: Area	C5: Area	q-Value	PEP	A2	XCorr A2	B2	XCorr B2	C2	XCorr C2	# Missed Cleavages
	TKDIEDVFYK	11	1	1	Q07955		1257.64	2.53877e+06	5.27647e+06	5.41757e+06	0	2.019e-05	High	4.00071	High	4.12185	High	3.76699	1
	IYVGNLPPDIR	31	1	1	Q07955		1256.7	408223	0	2.49768e+06	0	2.039e-05	High	3.83905	High	3.77957	High	4.0717	0
	EAGDVCYADVYRDGTGVVEFVR	3	1	1	Q07955	C6(Carbamidomethyl)	2477.15	1.08125e+06	1.98003e+06	1.98824e+06	0	1.386e-06	High	3.50629	High	3.33391	High	2.69676	1
	GGPPFAFVEFEDPRDAEDAVYGR	10	1	1	Q07955		2541.17	3.23641e+06	7.78302e+06	7.78755e+06	0	4.703e-05	High	2.98057	High	3.8526	High	3.2552	1
	VVVSGLPPSGSWQDLKDHMR	14	1	1	Q07955		2208.12	1.13063e+06	7.15489e+06	5.96558e+06	0	0.002876	High	2.71594	High	2.97021	High	2.61847	1
	EAGDVCYADVYR	4	1	1	Q07955	C6(Carbamidomethyl)	1417.6	703149	1.78839e+06	1.81156e+06	0	6.11e-05	High	2.47807	High	3.94044	High	3.24434	0
	YGAIRDIDLK	5	1	1	Q07955		1163.64	1.91234e+06	4.23691e+06	4.75236e+06	0	0.003797	High	2.47023	High	2.55515	High	2.67773	1
	DGTGVVEFVR	6	1	1	Q07955		1078.55	1.43869e+06	4.14976e+06	4.20752e+06	0	0.0001141	High	2.36635	High	3.08486	High	2.80188	0
	DGYDYDGYR	6	1	1	Q07955		1123.44	313485	1.33624e+06	2.00801e+06	0	0.0002625	High	2.16764	High	3.21385	High	3.24434	0
	SHEGETAYIR	11	1	1	Q07955		1162.55	0	329684	557106	0	0.0004166			High	3.03478	High	3.20834	0
	VVVSGLPPSGSWQDLK	8	1	1	Q07955		1668.9	0	467614	0	0	0.003089			High	2.52537	High	3.09778	0
	KEDMTYAVR	4	1	1	Q07955		1112.54	184448	0	292286	0.001	0.01064	High	2.0535	High	2.63745	High	2.86458	1
	GGPPFAFVEFEDPR	1	1	1	Q07955		1564.75	0	0	960885	0.008	0.09494					High	2.11619	0
P13693	Translationally-controlled tumor protein OS=Homo sapiens OX=9606 GN=TPT1 PE=1 SV=1 - [TCTP_HUMAN]	50	1	4	4	19	1.22836e+06	3.34847e+06	2.28484e+06	19.2506	50	4	6	19.7761	15.7	2	6	23.7753	22.67	3	7	172	19.5826	4.93213
	Sequence	# PSMs	# Proteins	# Protein Groups	Protein Group Accessions	Modifications	MH+ [Da]	A5: Area	B5: Area	C5: Area	q-Value	PEP	A2	XCorr A2	B2	XCorr B2	C2	XCorr C2	# Missed Cleavages
	DLISHDEMFSDIYK	10	1	1	P13693		1712.79	1.96784e+06	3.4699e+06	3.10701e+06	0	1.377e-09	High	4.50883	High	5.32487	High	5.72792	0
	VKPFMTGAAEQIK	6	1	1	P13693		1419.77	1.58864e+06	3.22704e+06	3.36608e+06	0	4.334e-07	High	4.28986	High	4.26838	High	4.79047	0
	EDGVTPYMIFFK	2	1	1	P13693		1446.7	128606	0	381420	0	0.007445	High	1.66483			High	2.17271	0
	TEGNIDDSLIGGNASAEGPEGEGTESTVITGVDIVMNHHLQETSFTK	1	1	1	P13693		4857.28	0	0	0	0.001	0.01145	High	2.74648					0
Q9BW30	Tubulin polymerization-promoting protein family member 3 OS=Homo sapiens OX=9606 GN=TPPP3 PE=1 SV=1 - [TPPP3_HUMAN]	50	1	9	9	109	1.16793e+07	2.96855e+07	3.29573e+07	105.165	50	9	31	134.549	50	9	39	129.565	50	9	39	176	18.9736	9.12939
	Sequence	# PSMs	# Proteins	# Protein Groups	Protein Group Accessions	Modifications	MH+ [Da]	A5: Area	B5: Area	C5: Area	q-Value	PEP	A2	XCorr A2	B2	XCorr B2	C2	XCorr C2	# Missed Cleavages
	SKEEAFDAICQLVAGKEPANVGVTK	18	1	1	Q9BW30	C10(Carbamidomethyl)	2661.36	1.58132e+07	3.71733e+07	4.03269e+07	0	1.351e-12	High	6.80905	High	5.37535	High	4.63827	2
	GIAGRQDILDDSGYVSAYK	9	1	1	Q9BW30		2028.01	4.48547e+06	1.19518e+07	1.32133e+07	0	1.983e-10	High	6.47945	High	5.16048	High	5.6437	1
	SKEEAFDAICQLVAGK	3	1	1	Q9BW30	C10(Carbamidomethyl)	1765.88	280338	803768	911309	0	2.581e-07	High	4.38948	High	3.16768	High	2.79021	1
	QDILDDSGYVSAYK	11	1	1	Q9BW30		1573.73	3.89006e+06	1.08308e+07	1.1075e+07	0	1.789e-06	High	4.15688	High	5.14138	High	4.3152	0
	SVTGTDVDIVFSK	17	1	1	Q9BW30		1367.71	1.462e+07	2.9838e+07	3.21721e+07	0	7.21e-07	High	3.95864	High	4.3679	High	4.49747	0
	VINYEEFKK	29	1	1	Q9BW30		1169.62	4.60492e+06	2.20452e+07	2.63729e+07	0	0.000624	High	3.19536	High	3.4235	High	3.35915	1
	TGGAVDRLTDTSR	11	1	1	Q9BW30		1348.69	1.35184e+06	3.5983e+06	5.10928e+06	0	0.002806	High	2.77425	High	3.27136	High	3.41433	1
	ALEELATKR	7	1	1	Q9BW30		1030.59	2.60374e+06	3.32914e+06	7.0204e+06	0	0.0003685	High	2.66102	High	3.54776	High	3.27749	1
	KALEELATKR	4	1	1	Q9BW30		1158.69	89089.3	723395	153635	0	0.0001223	High	2.11192	High	4.00095	High	4.02166	2
Q15836	Vesicle-associated membrane protein 3 OS=Homo sapiens OX=9606 GN=VAMP3 PE=1 SV=3 - [VAMP3_HUMAN]	50	1	5	5	26	1.90937e+06	5.93204e+06	6.05223e+06	38.243	50	5	8	42.0883	41	4	10	37.2653	40	3	8	100	11.302	8.79248
	Sequence	# PSMs	# Proteins	# Protein Groups	Protein Group Accessions	Modifications	MH+ [Da]	A5: Area	B5: Area	C5: Area	q-Value	PEP	A2	XCorr A2	B2	XCorr B2	C2	XCorr C2	# Missed Cleavages
	LSELDDRADALQAGASQFETSAAK	7	1	1	Q15836		2494.21	3.22357e+06	1.05133e+07	1.00903e+07	0	2.058e-10	High	6.4742	High	4.91286	High	5.12957	1
	LQQTQNQVDEVVDIMR	10	1	1	Q15836		1915.96	1.60147e+06	4.72048e+06	5.32169e+06	0	3.369e-10	High	5.8924	High	5.20624	High	5.97609	0
	ADALQAGASQFETSAAK	6	1	1	Q15836		1665.81	903056	2.56231e+06	2.74468e+06	0	1.925e-09	High	4.79757	High	4.98726	High	5.31184	0
	RLQQTQNQVDEVVDIMR	2	1	1	Q15836		2072.05	305667	961138	0	0	0.000554	High	3.74614	High	2.8329			1
	VNVDKVLER	1	1	1	Q15836		1071.61	457400	0	0	0.001	0.008375	High	2.44106					1
O00299	Chloride intracellular channel protein 1 OS=Homo sapiens OX=9606 GN=CLIC1 PE=1 SV=4 - [CLIC1_HUMAN]	49.79	1	9	9	36	1.6054e+06	2.84143e+06	3.06015e+06	32.8867	40.25	7	11	36.6202	40.66	7	12	41.7955	40.66	8	13	241	26.9057	5.17334
	Sequence	# PSMs	# Proteins	# Protein Groups	Protein Group Accessions	Modifications	MH+ [Da]	A5: Area	B5: Area	C5: Area	q-Value	PEP	A2	XCorr A2	B2	XCorr B2	C2	XCorr C2	# Missed Cleavages
	LAALNPESNTAGLDIFAK	6	1	1	O00299		1844.98	3.29351e+06	5.5167e+06	5.97339e+06	0	8.512e-09	High	5.50392	High	5.13425	High	4.08143	0
	VLDNYLTSPLPEEVDETSAEDEGVSQRK	3	1	1	O00299		3120.49	657307	643750	616033	0	9.999e-07	High	4.10938	High	2.37312	High	3.45974	1
	VLDNYLTSPLPEEVDETSAEDEGVSQR	4	1	1	O00299		2992.39	595150	1.54023e+06	1.46784e+06	0	9.498e-08	High	3.75956	High	3.12709	High	3.31545	0
	EEFASTCPDDEEIELAYEQVAK	1	1	1	O00299	C7(Carbamidomethyl)	2573.13	364342	0	0	0	0.0001121	High	3.61046					0
	KFLDGNELTLADCNLLPK	5	1	1	O00299	C13(Carbamidomethyl)	2061.07	865384	1.46735e+06	1.53321e+06	0	0.001094	High	3.2778	High	3.16994	High	2.5674	1
	FLDGNELTLADCNLLPK	4	1	1	O00299	C12(Carbamidomethyl)	1932.98	231142	0	1.04666e+06	0	4.274e-06	High	2.73086			High	3.54711	0
	NSNPALNDNLEK	9	1	1	O00299		1328.65	362077	1.05058e+06	1.67386e+06	0	1.47e-05	High	2.64284	High	4.08628	High	4.287	0
	GVTFNVTTVDTK	2	1	1	O00299		1281.68	0	666239	674645	0	1.618e-06			High	3.85465	High	3.76753	0
	YRGFTIPEAFR	2	1	1	O00299		1356.71	0	598435	733974	0	0.002684			High	2.19391	High	1.75712	1
P61978	Heterogeneous nuclear ribonucleoprotein K OS=Homo sapiens OX=9606 GN=HNRNPK PE=1 SV=1 - [HNRPK_HUMAN]	49.68	1	18	18	78	2.31641e+06	5.33303e+06	5.51056e+06	78.079	43.63	14	28	72.7309	29.37	11	25	73.975	31.53	13	25	463	50.9444	5.5415
	Sequence	# PSMs	# Proteins	# Protein Groups	Protein Group Accessions	Modifications	MH+ [Da]	A5: Area	B5: Area	C5: Area	q-Value	PEP	A2	XCorr A2	B2	XCorr B2	C2	XCorr C2	# Missed Cleavages
	IITITGTQDQIQNAQYLLQNSVK	11	1	1	P61978		2589.39	2.67471e+06	6.10421e+06	6.04644e+06	0	1.964e-09	High	5.62246	High	4.56914	High	4.33778	0
	GSYGDLGGPIITTQVTIPK	6	1	1	P61978		1917.04	1.69446e+06	3.58851e+06	3.97022e+06	0	1.256e-09	High	4.93501	High	5.76468	High	5.49965	0
	IILDLISESPIK	6	1	1	P61978		1340.81	2.34619e+06	2.99291e+06	2.84386e+06	0	2.022e-07	High	4.2921	High	4.42675	High	3.78858	0
	LLIHQSLAGGIIGVK	9	1	1	P61978		1518.94	1.67501e+06	3.71353e+06	3.66391e+06	0	7.823e-08	High	3.90651	High	3.87372	High	3.41866	0
	IILDLISESPIKGR	9	1	1	P61978		1553.93	1.77107e+06	6.18136e+06	6.51502e+06	0	6.137e-06	High	3.84697	High	4.18068	High	3.69884	1
	TDYNASVSVPDSSGPER	5	1	1	P61978		1780.8	924235	2.57534e+06	2.54597e+06	0	2.085e-08	High	3.54265	High	3.8715	High	4.41737	0
	IDEPLEGSEDRIITITGTQDQIQNAQYLLQNSVK	4	1	1	P61978		3829.96	64257.8	919263	1.00527e+06	0	6.859e-05	High	3.16396	High	1.78376	High	2.75756	1
	IIPTLEEGLQLPSPTATSQLPLESDAVECLNYQHYK	1	1	1	P61978	C29(Carbamidomethyl)	4055.03	1.23702e+06	0	0	0	0.002236	High	2.88708					0
	DLAGSIIGK	8	1	1	P61978		873.504	1.92834e+06	3.20352e+06	3.65788e+06	0	0.000811	High	2.73101	High	2.79723	High	2.486	0
	LFQECCPHSTDR	1	1	1	P61978	C5(Carbamidomethyl); C6(Carbamidomethyl)	1549.66	67981.1	0	0	0	0.00261	High	2.39076					0
	RPAEDMEEEQAFKR	2	1	1	P61978		1735.8	0	1.19982e+06	1.20785e+06	0	3.103e-05			High	4.70791	High	4.77744	1
	ALRTDYNASVSVPDSSGPER	3	1	1	P61978		2121.03	0	2.00271e+06	1.89414e+06	0	0.0001207			High	3.44251	High	2.57912	1
	SRNTDEMVELR	4	1	1	P61978		1349.65	0	926422	1.24875e+06	0	0.0008858			High	2.55954	High	2.87986	1
	IDEPLEGSEDR	1	1	1	P61978		1259.58	0	0	275565	0	8.628e-05					High	3.64713	0
	HESGASIKIDEPLEGSEDRIITITGTQDQIQNAQYLLQNSVK	1	1	1	P61978		4639.34	279501	0	0	0.001	0.01567	High	3.10366					2
	VVLIGGKPDR	5	1	1	P61978		1053.64	705959	0	467903	0.001	0.01074	High	2.48274			High	2.8373	0
	ILSISADIETIGEILKK	1	1	1	P61978		1843.08	0	0	0	0.004	0.05773	High	0.951605					1
	NLPLPPPPPPR	1	1	1	P61978		1194.7	0	0	0	0.008	0.09992	High	1.38174					0
Q9Y281	Cofilin-2 OS=Homo sapiens OX=9606 GN=CFL2 PE=1 SV=1 - [COF2_HUMAN]	48.8	1	2	6	25	2.32176e+06	4.74468e+06	5.09001e+06	27.8187	48.8	6	9	22.628	46.99	5	8	24.1515	46.99	5	8	166	18.7249	7.88428
	Sequence	# PSMs	# Proteins	# Protein Groups	Protein Group Accessions	Modifications	MH+ [Da]	A5: Area	B5: Area	C5: Area	q-Value	PEP	A2	XCorr A2	B2	XCorr B2	C2	XCorr C2	# Missed Cleavages
	QILVGDIGDTVEDPYTSFVK	6	1	1	Q9Y281		2196.11	646693	1.11183e+06	922054	0	1.166e-05	High	4.68097	High	3.01125	High	3.86149	0
	YALYDATYETK	9	2	2	P23528;Q9Y281		1337.63	5.96213e+06	1.20059e+07	1.32484e+07	0	3.095e-06	High	4.11875	High	4.02919	High	4.08123	0
	FTGIKHEWQVNGLDDIKDR	3	1	1	Q9Y281		2271.16	356451	1.11628e+06	1.09958e+06	0	0.001693	High	2.87235	High	2.24208	High	2.70301	2
	KEDLVFIFWAPESAPLK	3	2	2	P23528;Q9Y281		1990.07	139524	663047	705659	0	0.0004626	High	2.63479	High	2.60676	High	1.205	1
	MIYASSKDAIK	3	3	3	P23528;Q9Y281;P60981		1226.64	0	155519	472268	0.002	0.02449	High	1.97618	High	2.8071	High	2.91881	1
	ESKKEDLVFIFWAPESAPLK	1	2	2	P23528;Q9Y281		2334.24	201422	0	0	0.005	0.062	High	2.05063					2
P52272	Heterogeneous nuclear ribonucleoprotein M OS=Homo sapiens OX=9606 GN=HNRNPM PE=1 SV=3 - [HNRPM_HUMAN]	48.77	1	24	24	91	2.69235e+06	5.49662e+06	7.00467e+06	74.313	39.18	18	29	100.664	37.81	18	30	102.898	34.79	17	32	730	77.4643	8.70459
	Sequence	# PSMs	# Proteins	# Protein Groups	Protein Group Accessions	Modifications	MH+ [Da]	A5: Area	B5: Area	C5: Area	q-Value	PEP	A2	XCorr A2	B2	XCorr B2	C2	XCorr C2	# Missed Cleavages
	GIGMGNIGPAGMGMEGIGFGINK	5	1	1	P52272		2178.05	905105	1.08403e+06	1.24868e+06	0	3.344e-08	High	4.62346	High	2.51414	High	2.35255	0
	MGGMEGPFGGGMENMGR	6	1	1	P52272		1714.69	912903	2.44684e+06	2.57757e+06	0	1.058e-07	High	3.91261	High	5.01926	High	5.2618	0
	GNFGGSFAGSFGGAGGHAPGVAR	7	1	1	P52272		2034.95	1.7483e+06	4.47499e+06	4.68495e+06	0	7.265e-08	High	3.83388	High	3.25414	High	4.13452	0
	MGAGMGFGLER	5	1	1	P52272		1125.52	1.54408e+06	3.60527e+06	3.81287e+06	0	4.938e-06	High	3.81029	High	3.97736	High	3.2311	0
	AFITNIPFDVK	6	1	1	P52272		1264.7	2.49957e+06	5.34094e+06	5.74261e+06	0	8.617e-06	High	3.75233	High	3.8946	High	3.75693	0
	INEILSNALK	6	1	1	P52272		1114.65	2.74285e+06	6.67393e+06	6.89157e+06	0	3.045e-05	High	3.50825	High	3.58904	High	3.51569	0
	VGEVTYVELLMDAEGK	2	1	1	P52272		1752.87	174749	478696	0	0	7.061e-05	High	3.45083	High	3.37954			0
	QGGGGGGGSVPGIER	11	1	1	P52272		1284.63	688493	971572	1.77429e+06	0	1.611e-06	High	3.2034	High	4.2439	High	4.22408	0
	MGPAMGPALGAGIER	4	1	1	P52272	M1(Oxidation)	1443.71	306151	214678	302799	0	6.14e-05	High	3.04048	High	4.2754	High	3.04037	0
	MVPAGMGAGLER	1	1	1	P52272		1188.59	1.96705e+06	0	0	0	0.0001404	High	3.00751					0
	MGPLGLDHMASSIER	4	1	1	P52272		1613.78	2.83463e+06	643944	8379840	0	8.38e-08	High	2.54158	High	4.37692	High	4.47498	0
	GDFFPPERPQQLPHGLGGIGMGLGPGGQPIDANHLNK	6	1	1	P52272		3818.93	973625	594839	719657	0	0.002009	High	2.41344	High	2.0692	High	2.40958	0
	LGSTVFVANLDYK	3	1	1	P52272		1426.76	1.01182e+06	1.17785e+06	1.48042e+06	0	2.491e-07	High	1.94289	High	4.56123	High	4.24459	0
	MGLAMGGGGGASFDR	6	1	1	P52272		1383.62	0	1.46952e+06	1.59224e+06	0	7.577e-08			High	4.29465	High	4.42483	0
	DKFNECGHVLYADIK	2	1	1	P52272	C6(Carbamidomethyl)	1808.86	0	890967	1.00235e+06	0	0.0003374			High	3.42256	High	2.80137	1
	GIGMGNIGPAGMGMEGIGFGINK	2	1	1	P52272	M12(Oxidation)	2194.05	0	606141	624679	0	0.0002762			High	3.27268	High	3.97737	0
	LKEVFSMAGVVVR	2	1	1	P52272		1434.82	0	459363	541028	0	0.0001498			High	2.75962	High	2.68227	1
	FESPEVAER	3	1	1	P52272		1063.51	0	797522	1.02651e+06	0	0.000113			High	2.54427	High	3.05606	0
	INEILSNALKR	3	1	1	P52272		1270.75	237172	0	503056	0.001	0.01336	High	3.09667			High	1.61421	1
	GIGTVTFEQSIEAVQAISMFNGQLLFDRPMHVK	1	1	1	P52272		3663.86	0	0	0	0.001	0.01654	High	1.85191					0
	MGAGLGHGMDR	2	1	1	P52272		1101.49	433114	0	472497	0.002	0.03071	High	1.83919			High	2.09315	0
	WQSLKDLVK	1	1	1	P52272		1116.64	0	515302	0	0.004	0.05072			High	2.3986			1
	GGNRFEPYANPTKR	1	1	1	P52272		1606.81	312418	0	0	0.006	0.07503	High	3.0002					2
	FGSGMNMGR	1	1	1	P52272		956.408	295843	0	0	0.008	0.0994	High	1.75793					0
	NLPFDFTWK	1	1	1	P52272		1167.58	0	2.87302e+06	0	0.008	0.09481			High	1.84852			0
P06748	Nucleophosmin OS=Homo sapiens OX=9606 GN=NPM1 PE=1 SV=2 - [NPM_HUMAN]	48.3	1	9	9	56	2.33963e+06	5.40769e+06	5.78245e+06	47.2004	43.88	8	16	46.065	41.16	6	19	46.8804	33.33	7	21	294	32.5548	4.77979
	Sequence	# PSMs	# Proteins	# Protein Groups	Protein Group Accessions	Modifications	MH+ [Da]	A5: Area	B5: Area	C5: Area	q-Value	PEP	A2	XCorr A2	B2	XCorr B2	C2	XCorr C2	# Missed Cleavages
	TVSLGAGAKDELHIVEAEAMNYEGSPIK	8	1	1	P06748		2929.46	2.08917e+06	5.02861e+06	5.35881e+06	0	4.941e-09	High	4.97172	High	3.04942	High	4.09408	1
	MSVQPTVSLGGFEITPPVVLR	18	1	1	P06748		2227.22	3.76894e+06	8.05566e+06	8.04875e+06	0	1.679e-08	High	4.46479	High	3.9921	High	2.76238	0
	MTDQEAIQDLWQWR	6	1	1	P06748		1819.85	543268	716281	918743	0	8.819e-08	High	4.31585	High	3.96397	High	4.10946	0
	ADKDYHFKVDNDENEHQLSLR	3	1	1	P06748		2573.21	941192	1827436	1.92924e+06	0	3.561e-07	High	4.24959	High	4.02192	High	3.13013	2
	MSVQPTVSLGGFEITPPVVLR	6	1	1	P06748	M1(Oxidation)	2243.21	463347	1.14449e+06	1.06131e+06	0	3.46e-05	High	3.38737	High	2.61913	High	2.76636	0
	TVSLGAGAKDELHIVEAEAMNYEGSPIKVTLATLK	1	1	1	P06748		3655.92	681612	0	0	0	0.001005	High	2.87136					2
	LAADEDDDDDDEEDDDEDDDDDDFDDEEAEEKAPVKK	2	1	1	P06748		4246.55	664519	652156	0	0	7.894e-05	High	2.69354	High	3.73264			2
	VDNDENEHQLSLR	9	1	1	P06748		1568.73	716969	3.13881e+06	3.93979e+06	0	0.0009536	High	2.15862	High	2.84235	High	2.59297	0
	MTDQEAIQDLWQWRK	2	1	1	P06748		1947.94	1.16078e+06	0	2.08812e+06	0	0.0005432	High	2.11792			High	3.0069	1
	MQASIEKGGSLPK	1	1	1	P06748		1345.72	0	0	895629	0.003	0.03243					High	2.4591	1
P02649	Apolipoprotein E OS=Homo sapiens OX=9606 GN=APOE PE=1 SV=1 - [APOE_HUMAN]	48.26	1	12	12	49	747826	2.05237e+06	2.10325e+06	46.3003	44.16	10	14	59.4987	41.96	10	17	63.4625	48.26	12	18	317	36.1318	5.73193
	Sequence	# PSMs	# Proteins	# Protein Groups	Protein Group Accessions	Modifications	MH+ [Da]	A5: Area	B5: Area	C5: Area	q-Value	PEP	A2	XCorr A2	B2	XCorr B2	C2	XCorr C2	# Missed Cleavages
	WVQTLSEQVQEELLSSQVTQELR	4	1	1	P02649		2730.4	500628	2.01176e+06	2.10907e+06	0	1.029e-09	High	5.13119	High	2.40853	High	3.37532	0
	GEVQAMLGQSTEELR	3	1	1	P02649		1647.8	256693	559158	612639	0	5.203e-09	High	5.06976	High	4.53004	High	4.97666	0
	AATVGSLAGQPLQER	6	1	1	P02649		1497.81	1.29226e+06	2.57795e+06	2.54661e+06	0	6.746e-07	High	4.21373	High	4.8864	High	5.2436	0
	AYKSELEEQLTPVAEETR	4	1	1	P02649		2093.04	237927	895664	837803	0	1.496e-05	High	3.98687	High	3.98467	High	4.48802	1
	LGADMEDVCGR	3	1	1	P02649	C9(Carbamidomethyl)	1222.52	377763	983981	1.1353e+06	0	4.791e-05	High	3.6704	High	3.97738	High	4.07447	0
	SWFEPLVEDMQR	3	1	1	P02649		1536.72	306968	507470	495404	0	9.911e-06	High	3.65965	High	3.15061	High	3.13636	0
	VQAAVGTSAAPVPSDNH	3	1	1	P02649		1620.8	334301	837925	866105	0	1.128e-08	High	3.53501	High	5.4345	High	4.4439	0
	LGPLVEQGR	6	1	1	P02649		968.554	450591	832632	1.65408e+06	0	0.002293	High	3.31604	High	3.22993	High	3.46964	0
	AKLEEQAQQIR	12	1	1	P02649		1313.72	338526	1.02631e+06	1.30743e+06	0	7.602e-06	High	2.36004	High	3.63741	High	3.21119	1
	LKSWFEPLVEDMQR	2	1	1	P02649		1777.9	0	1.56741e+06	1.57136e+06	0	3.785e-05			High	2.94845	High	3.29652	1
	ALMDETMKELK	1	1	1	P02649		1308.66	0	0	275014	0	0.003279					High	2.70867	1
	LQAEAFQAR	2	1	1	P02649		1033.54	0	0	1.04052e+06	0.003	0.04053	High	1.78915			High	2.79404	0
Q9P0M6	Core histone macro-H2A.2 OS=Homo sapiens OX=9606 GN=H2AFY2 PE=1 SV=3 - [H2AW_HUMAN]	48.12	1	12	14	66	3.76962e+06	7.77646e+06	8.14865e+06	69.1812	45.16	12	24	68.4882	43.28	12	21	66.5847	42.47	11	21	372	40.0334	9.68604
	Sequence	# PSMs	# Proteins	# Protein Groups	Protein Group Accessions	Modifications	MH+ [Da]	A5: Area	B5: Area	C5: Area	q-Value	PEP	A2	XCorr A2	B2	XCorr B2	C2	XCorr C2	# Missed Cleavages
	HILLAVANDEELNQLLK	12	2	2	Q9P0M6;O75367		1933.08	3.00341e+06	6.78856e+06	7.01284e+06	0	1.79e-11	High	6.0866	High	4.75819	High	3.34915	0
	DSDKEGTSNSTSEDGPGDGFTILSSK	4	1	1	Q9P0M6		2631.16	243067	733965	741764	0	4.565e-05	High	4.54216	High	4.75655	High	4.62421	1
	GVTIASGGVLPR	4	1	1	Q9P0M6		1126.66	1.3182e+06	2.43904e+06	2.42749e+06	0	3.356e-07	High	4.50666	High	4.18849	High	3.82586	0
	VEGIVHPTTAEIDLKEDIGK	5	1	1	Q9P0M6		2164.15	1.1915e+06	817888	2.99196e+06	0	2.38e-07	High	4.47392	High	4.4643	High	4.35519	1
	LSLTQSDISHIGSMR	5	1	1	Q9P0M6		1644.84	1.41742e+06	4.70861e+06	4.97897e+06	0	7.792e-07	High	4.3751	High	4.01496	High	3.26432	0
	SQGPLEVAEAAVSQSSGLAAK	9	1	1	Q9P0M6		2000.03	0	3.01843e+06	2.91999e+06	0	3.349e-05	High	4.00719	High	3.77657	High	4.05888	0
	KSQGPLEVAEAAVSQSSGLAAK	4	1	1	Q9P0M6		2128.12	148354	0	0	0	0.002875	High	3.19721	High	2.43556	High	3.05306	1
	AGGKEFLETVKELR	4	1	1	Q9P0M6		1576.87	291657	904665	0	0	0.001437	High	2.84568	High	3.53581			2
	GKSETILSPPPEKR	2	1	1	Q9P0M6		1538.85	260053	0	0	0	0.002822	High	2.79633					2
	AGVIFPVGR	7	2	2	Q9P0M6;O75367		915.543	6.88804e+06	1.18322e+07	1.24541e+07	0	0.0008176	High	2.62656	High	2.48928	High	2.23388	0
	AISAHFDDSSASSLK	5	1	1	Q9P0M6		1535.74	104874	2.27903e+06	2.18988e+06	0	4.546e-06	High	2.01247	High	3.61548	High	3.83425	0
	AGGKEFLETVK	2	1	1	Q9P0M6		1178.64	0	499897	692130	0	0.00229			High	3.89206	High	3.39838	1
	VEGIVHPTTAEIDLKEDIGKALEK	1	1	1	Q9P0M6		2605.41	350175	0	0	0.003	0.03694	High	1.54172					2
	SVAFPPFPSGR	2	1	1	Q9P0M6		1161.6	0	0	0	0.005	0.06108			High	2.51154	High	2.03045	0
Q9Y265	RuvB-like 1 OS=Homo sapiens OX=9606 GN=RUVBL1 PE=1 SV=1 - [RUVB1_HUMAN]	47.81	1	16	16	59	1.34094e+06	2.84903e+06	3.0318e+06	46.0636	42.76	12	18	64.529	36.4	13	22	53.813	31.36	11	19	456	50.1963	6.41748
	Sequence	# PSMs	# Proteins	# Protein Groups	Protein Group Accessions	Modifications	MH+ [Da]	A5: Area	B5: Area	C5: Area	q-Value	PEP	A2	XCorr A2	B2	XCorr B2	C2	XCorr C2	# Missed Cleavages
	ALESSIAPIVIFASNR	10	1	1	Q9Y265		1687.94	677653	1.05806e+06	1.1502e+06	0	3.363e-08	High	4.65735	High	3.54387	High	3.14145	0
	VPFCPMVGSEVYSTEIK	3	1	1	Q9Y265	C4(Carbamidomethyl)	1942.93	212739	430307	471461	0	5.138e-06	High	3.80387	High	3.08877	High	3.8851	0
	TALALAIAQELGSK	1	1	1	Q9Y265		1385.8	125124	0	0	0	2.668e-05	High	3.36439					0
	AQTEGINISEEALNHLGEIGTK	3	1	1	Q9Y265		2324.18	1.15168e+06	1.6119e+06	0	0	5.634e-05	High	3.20392	High	1.29795			0
	QLKLDPSIFESLQK	1	1	1	Q9Y265		1645.92	354197	0	0	0	8.348e-05	High	3.13423					1
	GTEDITSPHGIPLDLLDR	5	1	1	Q9Y265		1949	1.00981e+06	2.78574e+06	3.03669e+06	0	0.0001517	High	3.06947	High	2.76691	High	3.37719	0
	EIIQDVTLHDLDVANARPQGGQDILSMMGQLMKPK	1	1	1	Q9Y265		3861.97	0	0	0	0	6.421e-05	High	3.05286					0
	GLGLDESGLAK	3	1	1	Q9Y265		1059.57	922588	2.69017e+06	2.46133e+06	0	2.224e-05	High	2.89311	High	3.54116	High	3.40962	0
	YSVQLLTPANLLAK	4	1	1	Q9Y265		1530.89	1.86134e+06	3.0712e+06	3.46879e+06	0	1.395e-05	High	2.85091	High	3.561	High	3.5579	0
	TISHVIIGLK	6	1	1	Q9Y265		1080.68	497887	985179	1.35883e+06	0	0.0002254	High	2.59744	High	3.03608	High	2.89622	0
	EACGVIVELIK	3	1	1	Q9Y265	C3(Carbamidomethyl)	1230.68	404850	775016	780316	0	0.001357	High	2.52257	High	2.19016	High	2.36076	0
	QAASGLVGQENAR	12	1	1	Q9Y265		1300.66	160645	513246	832095	0	5.175e-07	High	2.19072	High	3.89015	High	2.93505	0
	VPFCPMVGSEVYSTEIKK	1	1	1	Q9Y265	C4(Carbamidomethyl)	2071.03	0	0	0	0	0.003364			High	3.45957			1
	LDPSIFESLQK	2	1	1	Q9Y265		1276.68	0	1.95567e+06	1.98954e+06	0	1.556e-05			High	3.43626	High	3.06616	0
	AVLLAGPPGTGK	2	1	1	Q9Y265		1080.64	0	2.14092e+06	2.5899e+06	0	0.006108			High	3.03903	High	2.85044	0
	TMLYTPQEMK	2	1	1	Q9Y265		1241.59	0	1.24352e+06	1.42055e+06	0	0.0009257			High	2.81932	High	2.96857	0
O94760	N(G),N(G)-dimethylarginine dimethylaminohydrolase 1 OS=Homo sapiens OX=9606 GN=DDAH1 PE=1 SV=3 - [DDAH1_HUMAN]	47.72	1	8	8	30	1.15175e+06	2.23556e+06	2.11575e+06	20.8933	35.09	5	8	26.0404	34.74	6	10	35.4942	47.72	8	12	285	31.1019	5.80811
	Sequence	# PSMs	# Proteins	# Protein Groups	Protein Group Accessions	Modifications	MH+ [Da]	A5: Area	B5: Area	C5: Area	q-Value	PEP	A2	XCorr A2	B2	XCorr B2	C2	XCorr C2	# Missed Cleavages
	SFCSMAGPNLIAIGSSESAQK	8	1	1	O94760	C3(Carbamidomethyl)	2155.02	861867	2.48021e+06	2.62021e+06	0	9.665e-08	High	4.79086	High	4.28834	High	3.91844	0
	GAEILADTFKDYAVSTVPVADGLHLK	6	1	1	O94760		2730.44	1.57369e+06	3.06109e+06	2.0576e+06	0	4.475e-06	High	4.70132	High	2.63363	High	2.6716	1
	LQLNIVEMKDENATLDGGDVLFTGR	2	1	1	O94760		2748.39	362263	0	0	0	4.949e-06	High	2.75208			High	3.65032	1
	ALPESLGQHALR	5	1	1	O94760		1291.71	1.01969e+06	1.16538e+06	1.58216e+06	0	0.0001407	High	2.28301	High	3.53159	High	3.69755	0
	LKDHMLIPVSMSELEK	4	1	1	O94760		1869.98	255388	428550	767362	0	0.0001937	High	2.06188	High	2.01169	High	2.61714	1
	VDGLLTCCSVLINK	2	1	1	O94760	C7(Carbamidomethyl); C8(Carbamidomethyl)	1591.82	0	436798	485099	0	1.709e-06			High	4.00425	High	3.87215	0
	TPEEYPESAK	2	1	1	O94760		1150.53	0	0	322099	0	0.003568			High	2.63603	High	3.0207	0
	QHQLYVGVLGSK	1	1	1	O94760		1328.73	0	0	1.66944e+06	0	0.0035					High	3.25355	0
P04899	Guanine nucleotide-binding protein G(i) subunit alpha-2 OS=Homo sapiens OX=9606 GN=GNAI2 PE=1 SV=3 - [GNAI2_HUMAN]	47.61	1	10	12	33	2.13696e+06	4.05586e+06	4.69114e+06	39.6162	40.28	10	13	28.6457	29.86	7	9	27.1905	38.03	8	11	355	40.4251	5.5415
	Sequence	# PSMs	# Proteins	# Protein Groups	Protein Group Accessions	Modifications	MH+ [Da]	A5: Area	B5: Area	C5: Area	q-Value	PEP	A2	XCorr A2	B2	XCorr B2	C2	XCorr C2	# Missed Cleavages
	ITHSPLTICFPEYTGANKYDEAASYIQSK	2	1	1	P04899	C9(Carbamidomethyl)	3304.59	891768	0	2.23654e+06	0	5.571e-07	High	4.75083			High	2.2814	1
	IAQSDYIPTQQDVLR	3	1	1	P04899		1746.91	586311	1.97943e+06	2.2086e+06	0	4.658e-06	High	4.42543	High	4.3169	High	4.08487	0
	AVVYSNTIQSIMAIVK	5	1	1	P04899		1736.97	729069	1.12381e+06	1.19333e+06	0	1.455e-05	High	4.26547	High	4.02911	High	3.67515	0
	SREYQLNDSAAYYLNDLER	3	1	1	P04899		2320.09	193218	155658	236824	0	0.003352	High	3.37477	High	2.74189	High	2.29771	1
	LLLLGAGESGK	9	5	4	P04899;P09471;P63092;Q14344		1057.63	4.79005e+06	9.06434e+06	9.62828e+06	0	2.357e-05	High	3.25836	High	3.35446	High	3.43275	0
	AMGNLQIDFADPSRADDAR	3	1	1	P04899		2062.97	451866	1.08262e+06	1.30805e+06	0	0.002532	High	3.02931	High	3.04708	High	3.00703	1
	TTGIVETHFTFK	1	2	2	P04899;P09471		1380.72	296656	0	0	0	0.002058	High	2.36422					0
	AMGNLQIDFADPSR	1	1	1	P04899		1534.73	149473	0	0	0	0.004959	High	1.89456					0
	IIHEDGYSEEECR	2	1	1	P04899	C12(Carbamidomethyl)	1636.7	0	44732	73293.8	0	0.0002474			High	2.75257	High	2.17844	0
	LFDSICNNK	1	1	1	P04899	C6(Carbamidomethyl)	1110.53	202754	0	0	0.001	0.01679	High	2.1641					0
	LWADHGVQACFGR	1	1	1	P04899	C10(Carbamidomethyl)	1516.72	96487.2	0	0	0.002	0.0304	High	2.13436					0
	EIYTHFTCATDTK	2	1	1	P04899	C8(Carbamidomethyl)	1586.71	0	146030	157284	0.006	0.07073			High	2.23451	High	2.38983	0
Q15717	ELAV-like protein 1 OS=Homo sapiens OX=9606 GN=ELAVL1 PE=1 SV=2 - [ELAV1_HUMAN]	47.55	1	11	11	41	1.27793e+06	2.94505e+06	2.52354e+06	43.1022	47.24	10	17	30.6647	40.18	8	12	35.6387	37.73	8	12	326	36.0692	9.17334
	Sequence	# PSMs	# Proteins	# Protein Groups	Protein Group Accessions	Modifications	MH+ [Da]	A5: Area	B5: Area	C5: Area	q-Value	PEP	A2	XCorr A2	B2	XCorr B2	C2	XCorr C2	# Missed Cleavages
	VSYARPSSEVIKDANLYISGLPR	7	1	1	Q15717		2535.35	492880	2.38253e+06	641059	0	2.976e-07	High	4.83447	High	3.63189	High	3.90292	1
	DKVAGHSLGYGFVNYVTAK	5	1	1	Q15717		2026.04	315060	299103	641881	0	6.218e-08	High	4.8087	High	3.88202	High	3.2548	1
	VLVDQTTGLSR	4	1	1	Q15717		1188.66	1.26081e+06	3.50091e+06	3.75651e+06	0	6.731e-06	High	4.10992	High	3.68939	High	4.15222	0
	SLFSSIGEVESAK	6	1	1	Q15717		1353.69	1.16997e+06	2.95171e+06	2.87717e+06	0	1.474e-07	High	3.69326	High	4.28913	High	4.57664	0
	SEAEEAITSFNGHKPPGSSEPITVK	4	1	1	Q15717		2612.3	1.40302e+06	852841	925442	0	0.000607	High	3.40876	High	3.16145	High	3.39592	0
	VAGHSLGYGFVNYVTAK	1	1	1	Q15717		1782.92	387280	0	0	0	1.103e-05	High	3.38254					0
	TNLIVNYLPQNMTQDELR	5	1	1	Q15717		2162.09	444584	766069	876670	0	1.957e-08	High	2.95526	High	2.40435	High	3.89596	0
	TMTQKDVEDMFSR	5	1	1	Q15717		1587.72	242831	1.05874e+06	936917	0	0.001947	High	2.86686	High	2.81682	High	2.85716	1
	AINTLNGLR	2	1	1	Q15717		971.563	302043	680587	0	0	0.003892	High	1.91439	High	3.03864			0
	FAANPNQNKNVALLSQLYHSPAR	1	1	1	Q15717		2553.33	338832	0	0	0	8.836e-05	High	1.8303					1
	RSEAEEAITSFNGHKPPGSSEPITVK	1	1	1	Q15717		2768.39	0	0	0	0.001	0.01087					High	2.95153	1
P68032	Actin, alpha cardiac muscle 1 OS=Homo sapiens OX=9606 GN=ACTC1 PE=1 SV=1 - [ACTC_HUMAN]	47.48	2	5	19	346	1.85199e+07	3.8418e+07	4.03615e+07	231.083	42.71	16	87	398.179	45.89	17	135	376.662	37.93	15	124	377	41.9919	5.38916
	Sequence	# PSMs	# Proteins	# Protein Groups	Protein Group Accessions	Modifications	MH+ [Da]	A5: Area	B5: Area	C5: Area	q-Value	PEP	A2	XCorr A2	B2	XCorr B2	C2	XCorr C2	# Missed Cleavages
	MQKEITALAPSTMK	8	4	2	P60709;P68032		1548.81	2.03734e+06	1.78792e+07	1.83316e+07	0	1.515e-08	High	5.03441	High	4.58987	High	4.44077	1
	YPIEHGIITNWDDMEK	15	2	1	P68032		1960.91	9.4967e+06	2.57165e+07	2.53453e+07	0	1.27e-06	High	4.70795	High	4.60524	High	5.12036	0
	SYELPDGQVITIGNER	31	4	2	P60709;P68032		1790.9	2.16473e+07	4.64095e+07	4.83686e+07	0	5.691e-08	High	4.69196	High	4.78444	High	4.99333	0
	IWHHTFYNELR	10	4	2	P60709;P68032		1515.75	2.40499e+06	5.65851e+06	6.26597e+06	0	1.679e-06	High	4.31503	High	4.32366	High	4.21151	0
	HQGVMVGMGQKDSYVGDEAQSKR	4	4	2	P60709;P68032		2507.18	444092	3.1589e+06	3.12252e+06	0	4.943e-08	High	3.62087	High	4.38098	High	4.40534	2
	HQGVMVGMGQKDSYVGDEAQSKR	6	4	2	P60709;P68032	M8(Oxidation)	2523.18	200790	1.35475e+06	1.52861e+06	0	2.738e-05	High	3.61709	High	3.96865	High	2.88184	2
	AGFAGDDAPR	30	4	2	P60709;P68032		976.45	3.29732e+06	2.39613e+06	5.01612e+06	0	0.0001033	High	3.55318	High	3.82133	High	3.80645	0
	YPIEHGIITNWDDMEK	3	2	1	P68032	M14(Oxidation)	1976.91	417232	1.5479e+06	1.55853e+06	0	0.0003056	High	3.48102	High	2.13731	High	2.76355	0
	AVFPSIVGRPR	10	4	2	P60709;P68032		1198.71	1.97863e+07	1.63957e+07	1.80158e+07	0	0.001127	High	3.37507	High	3.62273	High	3.38089	0
	MQKEITALAPSTMK	8	4	2	P60709;P68032	M13(Oxidation)	1564.81	247209	1.06094e+06	1.05129e+06	0	2.422e-05	High	3.32493	High	3.58277	High	3.75971	1
	HQGVMVGMGQK	45	4	2	P60709;P68032		1171.57	2.23401e+06	239696	0	0	0.0002685	High	3.31864	High	3.97574	High	3.7668	0
	EITALAPSTMK	13	4	2	P60709;P68032		1161.62	1.41261e+07	4.31281e+07	4.73705e+07	0	0.0002414	High	3.16694	High	3.18766	High	3.06267	0
	LDLAGRDLTDYLMK	14	4	2	P60709;P68032		1623.84	5.37088e+06	1.15131e+07	1.20803e+07	0	3.428e-05	High	3.13961	High	3.52663	High	3.15015	1
	EITALAPSTMK	13	4	2	P60709;P68032	M10(Oxidation)	1177.61	815765	3.12372e+06	3.41969e+06	0	0.0003991	High	2.89872	High	3.58227	High	3.49554	0
	LDLAGRDLTDYLMK	3	4	2	P60709;P68032	M13(Oxidation)	1639.84	218903	727213	779342	0	0.0003242	High	2.70726	High	1.96349	High	2.31134	1
	DSYVGDEAQSKR	55	4	2	P60709;P68032		1354.62	1.02134e+06	5.7109e+06	6.66267e+06	0	4.188e-06	High	2.61414	High	3.76691	High	4.09715	1
	DSYVGDEAQSK	31	4	2	P60709;P68032		1198.52	185860	261039	552389	0	4.563e-05	High	2.43608	High	3.76661	High	3.76205	0
	IKIIAPPERK	7	4	2	P60709;P68032		1164.75	1.38091e+06	2.26539e+06	3.97867e+06	0	9.36e-05	High	2.37929	High	3.34284	High	3.1803	2
	TTGIVLDSGDGVTHNVPIYEGYALPHAIMR	2	2	1	P68032		3196.61	487979	595026	0	0	0.004967	High	1.7824	High	2.37527			0
	HQGVMVGMGQK	30	4	2	P60709;P68032	M5(Oxidation)	1187.57	0	438057	1.0005e+06	0	3.569e-05			High	3.6619	High	2.99417	0
	VAPEEHPTLLTEAPLNPK	2	2	1	P68032		1956.05	0	2.38107e+06	2.52631e+06	0	0.001286			High	2.64524	High	2.87053	0
	HQGVMVGMGQKDSYVGDEAQSK	2	4	2	P60709;P68032		2351.08	0	708342	833651	0	0.001626			High	2.2892	High	2.37311	1
	YPIEHGIITNWDDMEKIWHHTFYNELR	2	2	1	P68032		3457.64	0	4.4783e+06	0	0.001	0.007678			High	2.34949			1
	IKIIAPPER	1	4	2	P60709;P68032		1036.65	597286	0	0	0.004	0.05467	High	2.53615					1
	GILTLKYPIEHGIITNWDDMEK	1	2	1	P68032		2586.34	237170	0	0	0.006	0.07392	High	1.83821					1
P27824	Calnexin OS=Homo sapiens OX=9606 GN=CANX PE=1 SV=2 - [CALX_HUMAN]	47.3	1	23	23	124	4.77935e+06	1.28945e+07	1.43512e+07	120.173	38.51	19	44	108.075	35.81	17	39	115.841	33.78	18	41	592	67.5259	4.60205
	Sequence	# PSMs	# Proteins	# Protein Groups	Protein Group Accessions	Modifications	MH+ [Da]	A5: Area	B5: Area	C5: Area	q-Value	PEP	A2	XCorr A2	B2	XCorr B2	C2	XCorr C2	# Missed Cleavages
	KIPNPDFFEDLEPFR	18	1	1	P27824		1863.93	4.40624e+06	9.90931e+06	1.10816e+07	0	2.619e-08	High	5.1046	High	4.3386	High	4.60016	1
	APVPTGEVYFADSFDR	9	1	1	P27824		1770.84	2.90959e+06	4.25342e+06	4.22345e+06	0	4.23e-07	High	4.59281	High	4.98644	High	4.42058	0
	VTYKAPVPTGEVYFADSFDR	5	1	1	P27824		2262.11	1.62019e+06	1.72741e+06	1.38271e+06	0	1.705e-07	High	4.47445	High	3.60147	High	3.7445	1
	TPELNLDQFHDKTPYTIMFGPDKCGEDYK	3	1	1	P27824	C24(Carbamidomethyl)	3459.59	1.54085e+06	0	3.36065e+06	0	4.181e-06	High	4.31479			High	1.67127	2
	TPELNLDQFHDKTPYTIMFGPDK	7	1	1	P27824		2707.32	2.17991e+06	5.06366e+06	4.95586e+06	0	3.737e-07	High	4.27746	High	3.37009	High	3.52436	1
	IVDDWANDGWGLKK	6	1	1	P27824		1616.81	3.36092e+06	1.30825e+07	1.50805e+07	0	5.122e-06	High	4.20083	High	3.26874	High	3.44157	1
	IVDDWANDGWGLK	6	1	1	P27824		1488.71	1.3274e+06	2.33127e+06	2.50588e+06	0	7.301e-07	High	4.10897	High	4.74154	High	5.44277	0
	LNKPFLFDTKPLIVQYEVNFQNGIECGGAYVK	8	1	1	P27824	C26(Carbamidomethyl)	3701.91	665425	4.33505e+06	0	0	6.062e-07	High	3.77565	High	2.27196			0
	AEEDEILNR	9	1	1	P27824		1088.52	0	2.5912e+06	2.65688e+06	0	5.176e-05	High	3.57871	High	3.65673	High	3.61662	0
	IPNPDFFEDLEPFR	5	1	1	P27824		1735.84	402875	716632	605321	0	0.0001083	High	3.51379	High	3.50334	High	2.21111	0
	GTLSGWILSK	7	1	1	P27824		1061.6	3.70612e+06	7.22702e+06	7.57036e+06	0	0.0003348	High	3.44749	High	3.52723	High	3.34878	0
	TPELNLDQFHDK	6	1	1	P27824		1456.71	809016	2.652e+06	2.8924e+06	0	2.465e-07	High	3.18181	High	3.89928	High	5.04395	0
	LPGDKGLVLMSR	5	1	1	P27824		1285.74	2.83453e+06	5.99014e+06	6.31597e+06	0	0.0002488	High	3.0881	High	3.52519	High	4.06234	1
	CESAPGCGVWQRPVIDNPNYK	7	1	1	P27824	C1(Carbamidomethyl); C7(Carbamidomethyl)	2447.13	3.00114e+06	6.21941e+06	6.19714e+06	0	3.652e-06	High	2.78979	High	4.27679	High	3.49009	0
	WKPPMIDNPSYQGIWKPR	6	1	1	P27824		2213.13	6.22568e+06	1.56918e+07	1.68915e+07	0	1.086e-05	High	2.7661	High	1.8729	High	2.33786	0
	WKPPMIDNPSYQGIWKPR	4	1	1	P27824	M5(Oxidation)	2229.12	1.30583e+06	2.91817e+06	5.47011e+06	0	0.001256	High	1.56176	High	2.17508	High	2.41025	0
	RIVDDWANDGWGLKK	2	1	1	P27824		1772.91	0	734049	775911	0	1.35e-05			High	3.34452	High	4.07024	2
	IPDPEAVKPDDWDEDAPAK	2	1	1	P27824		2107.98	0	538720	463298	0	0.001869			High	2.78064	High	3.10367	0
	YDGKWEVEEMKESK	1	1	1	P27824		1757.8	0	0	363408	0	0.008146					High	2.68325	2
	APVPTGEVYFADSFDRGTLSGWILSK	3	1	1	P27824		2813.42	934195	0	0	0.001	0.02199	High	2.0439					1
	CESAPGCGVWQRPVIDNPNYKGK	1	1	1	P27824	C1(Carbamidomethyl); C7(Carbamidomethyl)	2632.24	118449	0	0	0.001	0.008114	High	1.68424					1
	CGEDYKLHFIFR	1	1	1	P27824	C1(Carbamidomethyl)	1584.77	128518	0	0	0.004	0.05972	High	1.98298					1
	THLYTLILNPDNSFEILVDQSVVNSGNLLNDMTPPVNPSR	1	1	1	P27824		4437.24	74371.3	0	0	0.004	0.05228	High	0.714645					0
	EIEDPEDRKPEDWDERPK	2	1	1	P27824		2283.05	0	6.12131e+06	5.90745e+06	0.006	0.07144			High	1.70142	High	1.88234	1
O75947	ATP synthase subunit d, mitochondrial OS=Homo sapiens OX=9606 GN=ATP5H PE=1 SV=3 - [ATP5H_HUMAN]	47.2	1	5	5	33	1.4445e+06	2.64712e+06	2.74685e+06	22.866	40.99	4	10	23.604	39.75	4	9	33.4491	47.2	5	14	161	18.4795	5.30029
	Sequence	# PSMs	# Proteins	# Protein Groups	Protein Group Accessions	Modifications	MH+ [Da]	A5: Area	B5: Area	C5: Area	q-Value	PEP	A2	XCorr A2	B2	XCorr B2	C2	XCorr C2	# Missed Cleavages
[truncated: 6,400 more rows]

## Sheet: EP2
Accession	Description	ΣCoverage	Σ# Proteins	Σ# Unique Peptides	Σ# Peptides	Σ# PSMs	A5: Area	B5: Area	C5: Area	Score A2	Coverage A2	# Peptides A2	# PSM A2	Score B2	Coverage B2	# Peptides B2	# PSM B2	Score C2	Coverage C2	# Peptides C2	# PSM C2	# AAs	MW [kDa]	calc. pI
P69905	Hemoglobin subunit alpha OS=Homo sapiens OX=9606 GN=HBA1 PE=1 SV=2 - [HBA_HUMAN]	91.55	1	18	18	181	4.79574e+09	4.69778e+09	4.79685e+09	106.724	91.55	15	64	111.397	57.04	12	56	120.271	61.97	14	61	142	15.2479	8.67529
	Sequence	# PSMs	# Proteins	# Protein Groups	Protein Group Accessions	Modifications	MH+ [Da]	A5: Area	B5: Area	C5: Area	q-Value	PEP	A2	XCorr A2	B2	XCorr B2	C2	XCorr C2	# Missed Cleavages
	AAWGKVGAHAGEYGAEALER	21	1	1	P69905		2043.01	2273656239	2.20105e+09	2.43982e+09	0	0.0001571	High	6.2547	High	5.74911	High	5.88941	1
	VGAHAGEYGAEALER	25	1	1	P69905		1529.74	5.96091e+09	6.0764e+09	5.86119e+09	0	0.00103	High	4.60292	High	4.91848	High	4.56871	0
	VGAHAGEYGAEALERMFLSFPTTK	15	1	1	P69905	M16(Oxidation)	2598.27	4.12197e+08	3.76791e+08	4.92072e+08	0	0.001474	High	4.16275	High	4.06041	High	3.82717	1
	TYFPHFDLSHGSAQVK	15	1	1	P69905		1833.9	2016843408	1.91694e+09	1.93931e+09	0	7.344e-07	High	3.66777	High	3.51747	High	4.08797	0
	AAWGKVGAHAGEYGAEALERMFLSFPTTK	12	1	1	P69905		3095.55	1.22899e+08	1.48805e+08	1.47243e+08	0	0.00974	High	3.2365	High	3.48423	High	2.71606	2
	VGAHAGEYGAEALERMFLSFPTTK	17	1	1	P69905		2582.28	9.16108e+08	9.73827e+08	8.69516e+08	0	1.012e-07	High	3.11546	High	4.0358	High	4.57281	1
	VADALTNAVAHVDDMPNALSALSDLHAHKLR	3	1	1	P69905	M15(Oxidation)	3281.68	6.88999e+07	0	72640260	0	0.0008228	High	2.69245			High	3.10355	1
	MFLSFPTTK	14	1	1	P69905	M1(Oxidation)	1087.55	6.94741e+08	6.80117e+08	6.81206e+08	0	0.01266	High	2.59954	High	2.6177	High	2.42895	0
	MFLSFPTTK	11	1	1	P69905		1071.56	6152651937	5815902069	6089545243	0	0.01136	High	2.58206	High	2.54486	High	2.66341	0
	VADALTNAVAHVDDMPNALSALSDLHAHKLR	8	1	1	P69905		3265.69	2.67802e+08	2.65101e+08	2.65668e+08	0	0.02394	High	2.51201	High	2.12059	High	2.93569	1
	VGAHAGEYGAEALERMFLSFPTTKTYFPHFDLSHGSAQVK	4	1	1	P69905		4397.16	2.05948e+08	66729132	154616862	0	0.01149	High	2.31219	High	2.87305	High	2.83358	2
	VADALTNAVAHVDDMPNALSALSDLHAHK	5	1	1	P69905		2996.5	6.71238e+08	6.92574e+08	6.88894e+08	0	0.0003316	High	2.02529	High	2.72073	High	3.28895	0
	VADALTNAVAHVDDMPNALSALSDLHAHK	4	1	1	P69905	M15(Oxidation)	3012.49	6.45181e+07	2.11567e+08	2.59555e+08	0	1.163e-06	High	1.66716	High	1.62951	High	3.84215	0
	MFLSFPTTKTYFPHFDLSHGSAQVK	9	1	1	P69905		2886.44	8.43655e+08	9.19102e+08	1.05635e+09	0	0.004788	High	1.52309	High	3.98639	High	1.92343	1
	TYFPHFDLSHGSAQVKGHGKK	6	1	1	P69905		2341.19	172587468	7.6279e+08	167305399	0.001	0.004539	High	2.28069	High	2.3385	High	1.93395	2
	VADALTNAVAHVDDMPNALSALSDLHAHKLRVDPVNFK	1	1	1	P69905		4065.11	1.52731e+08	0	0	0.001	0.04974	High	2.01063					2
	KVADALTNAVAHVDDMPNALSALSDLHAHK	2	1	1	P69905		3124.59	1.96066e+08	0	1.89278e+08	0.001	0.003886	High	1.72837			High	1.85019	1
	KVADALTNAVAHVDDMPNALSALSDLHAHKLR	1	1	1	P69905		3393.78	0	5.84045e+07	0	0.001	0.03673			High	2.62762			2
	KVADALTNAVAHVDDMPNALSALSDLHAHK	1	1	1	P69905	M16(Oxidation)	3140.59	0	0	2.14071e+07	0.001	0.009589					High	2.13467	1
	LRVDPVNFK	1	1	1	P69905		1087.63	0	0	4.50719e+07	0.001	0.008698					High	1.99835	1
	LLSHCLLVTLAAHLPAEFTPAVHASLDKFLASVSTVLTSKYR	1	1	1	P69905	C5(Carbamidomethyl)	4577.5	3.51502e+06	0	0	0.002	0.07149	High	2.39689					2
	MFLSFPTTKTYFPHFDLSHGSAQVKGHGK	2	1	1	P69905		3265.64	0	0	2.2306e+08	0.002	0.01502					High	1.97998	2
	AAWGKVGAHAGEYGAEALERMFLSFPTTK	2	1	1	P69905	M21(Oxidation)	3111.54	77931994	7.45507e+07	0	0.003	0.07946	High	1.20739	High	2.29459			2
	TYFPHFDLSHGSAQVKGHGK	1	1	1	P69905		2213.09	1.29276e+07	0	0	0.008	0.137	High	1.93104					1
P68871	Hemoglobin subunit beta OS=Homo sapiens OX=9606 GN=HBB PE=1 SV=2 - [HBB_HUMAN]	91.16	1	12	18	231	2.30384e+09	2.11073e+09	2.23748e+09	189.896	76.19	15	81	181.085	82.31	17	77	172.404	91.16	15	73	147	15.9883	7.28369
	Sequence	# PSMs	# Proteins	# Protein Groups	Protein Group Accessions	Modifications	MH+ [Da]	A5: Area	B5: Area	C5: Area	q-Value	PEP	A2	XCorr A2	B2	XCorr B2	C2	XCorr C2	# Missed Cleavages
	FFESFGDLSTPDAVMGNPKVK	19	1	1	P68871		2286.12	1318578019	1241256544	1461701295	0	0.0002765	High	5.44215	High	4.9856	High	3.99613	1
	SAVTALWGKVNVDEVGGEALGR	17	1	1	P68871		2228.17	1.2249e+09	1.09815e+09	1.26672e+09	0	7.676e-09	High	4.94475	High	4.71325	High	5.40381	1
	FFESFGDLSTPDAVMGNPK	13	1	1	P68871	M15(Oxidation)	2074.95	2.01373e+08	168123504	2.33925e+08	0	1.044e-11	High	4.91083	High	4.6819	High	6.01308	0
	FFESFGDLSTPDAVMGNPK	22	1	1	P68871		2058.95	7.32261e+08	654056708	651339075	0	2.155e-07	High	4.63725	High	4.03354	High	5.39557	0
	VNVDEVGGEALGR	16	1	1	P68871		1314.67	1.5956e+09	1.42607e+09	1.44725e+09	0	0.0053	High	4.37582	High	4.59428	High	4.54459	0
	VVAGVANALAHKYH	21	2	2	P68871;P02042		1449.8	1.73796e+09	1652787641	1.55669e+09	0	0.00609	High	3.95977	High	3.76933	High	3.42703	1
	VVAGVANALAHK	3	2	2	P68871;P02042		1149.68	3.47243e+07	2.99304e+07	3.15314e+07	0	0.01457	High	3.57289	High	2.6744	High	2.51316	0
	VNVDEVGGEALGRLLVVYPWTQR	5	1	1	P68871		2570.38	8.70449e+07	1.33063e+08	1.31683e+08	0	0.004833	High	3.45432	High	2.72798	High	2.36489	1
	LLGNVLVCVLAHHFGKEFTPPVQAAYQK	13	1	1	P68871	C8(Carbamidomethyl)	3136.68	5.76335e+08	6.16854e+08	6.43693e+08	0	0.02679	High	3.19699	High	1.57932	High	2.68072	1
	LLVVYPWTQR	33	3	3	P68871;P02042;P69892		1274.73	3.57797e+09	3.25334e+09	3694045102	0	3.836e-05	High	3.06213	High	2.88852	High	3.23719	0
	LLVVYPWTQRFFESFGDLSTPDAVMGNPKVK	14	1	1	P68871		3541.84	4.41213e+08	5.1909e+08	6.3934e+08	0	0.003207	High	3.05352	High	2.9885	High	2.86935	2
	SAVTALWGK	10	1	1	P68871		932.522	991322505	1.00567e+09	1.0154e+09	0	1.759e-06	High	3.03457	High	3.13049	High	3.1418	0
	KVLGAFSDGLAHLDNLK	6	2	2	P68871;P02042		1797.99	8.32895e+07	6.94108e+07	7.09985e+07	0	0.003549	High	3.00919	High	2.37453	High	2.03884	1
	FFESFGDLSTPDAVMGNPKVK	13	1	1	P68871	M15(Oxidation)	2302.09	2.76151e+08	2.9585e+08	3.00043e+08	0	0.009483	High	2.97455	High	3.37066	High	2.96911	1
	EFTPPVQAAYQK	3	1	1	P68871		1378.7	6.14985e+07	5.94969e+07	0	0	0.0145	High	1.97419	High	2.69471			0
	VLGAFSDGLAHLDNLK	7	2	2	P68871;P02042		1669.89	3.74726e+08	3.62273e+08	3.93546e+08	0	0.003755	High	1.91015	High	4.22551	High	3.49379	0
	LLVVYPWTQRFFESFGDLSTPDAVMGNPKVK	5	1	1	P68871	M25(Oxidation)	3557.82	1.39971e+08	2.41036e+08	2.63741e+08	0	0.02986	High	1.11247	High	1.33301	High	1.61681	2
	LLVVYPWTQRFFESFGDLSTPDAVMGNPK	5	1	1	P68871		3314.66	1.70988e+08	3.89364e+07	54306279	0.001	0.04925	High	2.72762	High	2.34751	High	2.00406	1
	LLVVYPWTQRFFESFGDLSTPDAVMGNPK	3	1	1	P68871	M25(Oxidation)	3330.66	3.0267e+07	0	1.39234e+08	0.001	0.00345	High	1.8401			High	2.16477	1
	GTFATLSELHCDKLHVDPENFR	1	1	1	P68871	C11(Carbamidomethyl)	2586.25	0	0	3.01822e+07	0.001	0.009838					High	1.64478	1
	LHVDPENFRLLGNVLVCVLAHHFGKEFTPPVQAAYQK	1	1	1	P68871	C17(Carbamidomethyl)	4244.22	0	0	0	0.006	0.1168			High	2.43297			2
	LHVDPENFR	1	2	2	P68871;P02042		1126.56	0	1.0765e+07	0	0.007	0.1298			High	1.8579			0
P14136	Glial fibrillary acidic protein OS=Homo sapiens OX=9606 GN=GFAP PE=1 SV=1 - [GFAP_HUMAN]	87.27	1	49	49	277	1.72471e+09	1.59686e+09	1.68235e+09	188.82	68.98	35	89	194.71	69.91	40	88	207.365	82.87	44	100	432	49.8496	5.51611
	Sequence	# PSMs	# Proteins	# Protein Groups	Protein Group Accessions	Modifications	MH+ [Da]	A5: Area	B5: Area	C5: Area	q-Value	PEP	A2	XCorr A2	B2	XCorr B2	C2	XCorr C2	# Missed Cleavages
	TQYEAMASSNMHEAEEWYR	12	1	1	P14136		2332.96	2.14203e+08	2.11685e+08	2.06723e+08	0	5.869e-06	High	6.04446	High	5.57045	High	5.37926	0
	LLEGEENRITIPVQTFSNLQIR	6	1	1	P14136		2570.4	99431556	7.75931e+07	82937141	0	0.0006888	High	4.85855	High	3.93251	High	3.1338	1
	FLEQQNKALAAELNQLR	10	1	1	P14136		1986.08	2.1364e+08	2.01176e+08	2.22879e+08	0	0.002544	High	4.69619	High	3.33969	High	3.6875	1
	SYVSSGEMMVGGLAPGR	7	1	1	P14136		1697.8	77620611	6.96867e+07	6.65991e+07	0	0.0005017	High	4.38884	High	3.76633	High	4.34129	0
	RSYVSSGEMMVGGLAPGRR	8	1	1	P14136		2010	287427783	241152864	250407033	0	0.006908	High	4.37661	High	3.4511	High	3.58434	2
	HLQEYQDLLNVK	7	1	1	P14136		1499.79	1.64978e+08	158661383	1.70536e+08	0	0.00159	High	4.2206	High	4.28636	High	4.05471	0
	LEEEGQSLKDEMAR	9	1	1	P14136		1634.77	3.03294e+08	3.06964e+08	3.03241e+08	0	0.002184	High	4.06269	High	3.6463	High	3.74757	1
	QLQSLTCDLESLR	3	1	1	P14136	C7(Carbamidomethyl)	1562.79	37847316	3.72799e+07	3.79257e+07	0	0.00167	High	3.97263	High	3.19026	High	3.39789	0
	FADLTDAAAR	10	1	1	P14136		1050.52	8.24898e+08	787896814	814389861	0	0.0001995	High	3.91057	High	3.6899	High	3.53945	0
	SKFADLTDAAAR	15	1	1	P14136		1265.65	4.48812e+08	4.3831e+08	4.66289e+08	0	1.751e-09	High	3.83329	High	3.80704	High	4.30742	1
	ALAAELNQLR	7	1	1	P14136		1098.63	2.34162e+08	2.17201e+08	225759950	0	0.00274	High	3.60914	High	4.0272	High	3.79102	0
	EAASYQEALARLEEEGQSLKDEMAR	8	1	1	P14136		2824.35	418631103	6.8692e+08	5.01109e+07	0	0.002511	High	3.53749	High	4.19449	High	3.42598	2
	LEVERDNLAQDLATVR	8	1	1	P14136		1841.98	1.37889e+08	1.31305e+08	1.4385e+08	0	0.00356	High	3.49983	High	3.84251	High	3.29986	1
	EAASYQEALAR	9	1	1	P14136		1208.59	2.85911e+08	2.83541e+08	2.85293e+08	0	0.01151	High	3.43205	High	3.75316	High	3.32892	0
	ITIPVQTFSNLQIR	6	1	1	P14136		1629.94	20285101	1.36892e+07	1.67116e+07	0	4.18e-07	High	3.25356	High	3.49	High	3.71855	0
	QLQSLTCDLESLRGTNESLER	13	1	1	P14136	C7(Carbamidomethyl)	2449.21	1.84917e+09	1.64201e+09	1.83631e+09	0	5.006e-05	High	3.10811	High	2.36433	High	2.22739	1
	SKFADLTDAAARNAELLR	13	1	1	P14136		1962.05	4.47106e+08	4.1413e+08	392389388	0	0.009696	High	3.09746	High	3.90271	High	2.88683	2
	TQYEAMASSNMHEAEEWYR	9	1	1	P14136	M11(Oxidation)	2348.96	1.52313e+07	1.6613e+07	1.37473e+07	0	0.03182	High	3.0851	High	3.01701	High	2.87375	0
	LRLDQLTANSAR	6	1	1	P14136		1357.76	6.99361e+07	6.8952e+07	6.78445e+07	0	0.02212	High	3.03554	High	2.99717	High	2.93179	1
	LEAENNLAAYR	2	1	1	P14136		1263.64	4.57713e+06	3.84819e+06	0	0	0.02559	High	2.90927	High	3.32602			0
	SYVSSGEMMVGGLAPGRR	12	1	1	P14136		1853.91	1.94853e+09	1.79943e+09	1.80355e+09	0	0.001255	High	2.80634	High	2.79344	High	3.62638	1
	KLLEGEENRITIPVQTFSNLQIR	3	1	1	P14136		2698.5	4.58636e+06	9.99551e+07	119551092	0	0.02658	High	2.70964	High	0.984639	High	1.92959	2
	IHEEEVRELQEQLAR	4	1	1	P14136		1878.97	5.76609e+07	5.7043e+07	3.37473e+07	0	0.03145	High	2.66646	High	1.6074	High	2.17422	1
	ETSLDTKSVSEGHLKR	12	1	1	P14136		1786.93	3.87543e+08	3.62274e+08	3.87533e+08	0	0.008537	High	2.37203	High	2.64232	High	2.50052	2
	KIESLEEEIRFLR	3	1	1	P14136		1661.93	8637367	0	3.32844e+07	0	6.621e-05	High	2.32829			High	2.93647	2
	RQLQSLTCDLESLRGTNESLER	3	1	1	P14136	C8(Carbamidomethyl)	2605.3	4.11295e+07	3.98048e+07	4.64686e+07	0	0.01013	High	2.20392	High	2.37824	High	1.46481	2
	NIVVKTVEMR	3	1	1	P14136		1188.68	6.48374e+07	6.02062e+07	6.10936e+07	0	0.01173	High	2.19033	High	2.97027	High	3.09918	1
	QLQSLTCDLESLRGTNESLERQMR	3	1	1	P14136	C7(Carbamidomethyl)	2864.4	1.49958e+08	1.5081e+08	1.58176e+08	0	0.002209	High	2.05177	High	1.068	High	1.51191	2
	TQYEAMASSNMHEAEEWYRSK	10	1	1	P14136		2548.09	2.17632e+08	2.14909e+08	2.15926e+08	0	1.209e-07	High	1.82798	High	2.88783	High	3.90669	1
	FADLTDAAARNAELLR	7	1	1	P14136		1746.92	1.37643e+09	1.34914e+09	1.40718e+09	0	0.0004528	High	1.73959	High	1.90451	High	2.28279	1
	FADLTDAAARNAELLRQAK	2	1	1	P14136		2074.11	0	22531415	2.55584e+07	0	0.001169			High	2.57014	High	1.71309	2
	RSYVSSGEMMVGGLAPGR	2	1	1	P14136		1853.9	0	4.68839e+07	4.35839e+07	0	0.0004844			High	2.29406	High	3.12736	1
	VRFLEQQNKALAAELNQLR	3	1	1	P14136		2241.26	0	3.90163e+07	3.79591e+07	0	0.0001699			High	2.23535	High	2.02589	2
	LADVYQAELRELR	2	1	1	P14136		1575.86	0	2.69182e+07	2.61385e+07	0	0.002471			High	1.84072	High	1.26248	1
	HVREAASYQEALAR	1	1	1	P14136		1600.82	0	0	6.1769e+07	0	5.622e-07					High	3.57812	1
	SYVSSGEMMVGGLAPGR	2	1	1	P14136	M9(Oxidation)	1713.8	5.00046e+06	4.10702e+06	0	0.001	0.05311	High	3.08834	High	2.63154			0
	AEMMELNDR	3	1	1	P14136		1108.48	1.45223e+07	1.47634e+07	1.6164e+07	0.001	0.02834	High	2.49301	High	2.68738	High	2.73223	0
	ETSLDTKSVSEGHLK	5	1	1	P14136		1630.83	9.88744e+07	1.85769e+06	54494592	0.001	0.04705	High	2.40068	High	2.60776	High	1.58027	1
	SYVSSGEMMVGGLAPGRR	5	1	1	P14136	M8(Oxidation)	1869.9	1.63961e+08	1.50363e+08	1.29036e+08	0.001	0.03959	High	2.397	High	1.61385	High	1.53867	1
	LDQLTANSARLEVERDNLAQDLATVR	1	1	1	P14136		2911.53	17395268	0	0	0.001	0.05335	High	2.19392					2
	AKEPTKLADVYQAELR	2	1	1	P14136		1831.99	2.21717e+07	0	2.58607e+07	0.001	0.05457	High	1.65265			High	2.99366	2
	ASERAEMMELNDR	3	1	1	P14136		1551.69	0	44619516	2.01547e+06	0.001	0.04645			High	3.87214	High	3.32515	1
	MPPPLPTRVDFSLAGALNAGFKETR	4	1	1	P14136		2685.43	0	0	315099256	0.001	0.04677			High	3.33106	High	2.01063	2
	KIHEEEVRELQEQLAR	1	1	1	P14136		2007.07	0	4.18292e+07	0	0.001	0.03523			High	2.16398			2
	FLEQQNKALAAELNQLRAK	1	1	1	P14136		2185.22	0	0	3.31204e+06	0.001	0.009975					High	3.47022	2
	TVEMRDGEVIKESK	1	1	1	P14136		1620.83	0	0	2.69037e+07	0.001	0.008449					High	1.93419	2
	LALDIEIATYRK	1	1	1	P14136		1405.81	0	0	9.81102e+06	0.001	0.008126					High	1.58414	1
	LLEGEENRITIPVQTFSNLQIRETSLDTK	3	1	1	P14136		3344.78	9.37762e+07	8.64326e+07	9.44229e+07	0.002	0.05145	High	1.09748	High	1.84931	High	1.52041	2
	TQYEAMASSNMHEAEEWYRSK	1	1	1	P14136	M11(Oxidation)	2564.09	0	0	7.2045e+06	0.002	0.02012					High	1.52432	1
	QQVHVELDVAKPDLTAALKEIR	2	1	1	P14136		2473.38	2.61843e+07	0	2.04533e+07	0.004	0.1133	High	1.50693			High	1.51677	1
	TQYEAMASSNMHEAEEWYRSKFADLTDAAAR	1	1	1	P14136		3579.59	0	5.88336e+07	0	0.004	0.09371			High	1.97503			2
	TQYEAMASSNMHEAEEWYR	1	1	1	P14136	M6(Oxidation); M11(Oxidation)	2364.95	0	8.33889e+06	0	0.004	0.09082			High	1.79651			0
	ASERAEMMELNDRFASYIEK	1	1	1	P14136		2390.12	0	3.7593e+07	0	0.004	0.07054			High	1.77767			2
	LGPGTRLSLAR	1	1	1	P14136		1140.69	0	0	1.54796e+08	0.009	0.06751					High	1.48827	1
P02768	Serum albumin OS=Homo sapiens OX=9606 GN=ALB PE=1 SV=2 - [ALBU_HUMAN]	86.54	1	77	77	657	1.32726e+09	1.30647e+09	1.33463e+09	480.077	85.88	68	222	473.977	86.04	68	208	508.347	85.39	67	227	609	69.3215	6.27783
	Sequence	# PSMs	# Proteins	# Protein Groups	Protein Group Accessions	Modifications	MH+ [Da]	A5: Area	B5: Area	C5: Area	q-Value	PEP	A2	XCorr A2	B2	XCorr B2	C2	XCorr C2	# Missed Cleavages
	VFDEFKPLVEEPQNLIK	10	1	1	P02768		2045.1	3.77321e+08	3.68455e+08	423441022	0	0.02204	High	4.85795	High	4.22808	High	3.83307	0
	SHCIAEVENDEMPADLPSLAADFVESK	11	1	1	P02768	C3(Carbamidomethyl)	2974.35	1.76099e+08	2.40684e+08	2.50653e+08	0	5.978e-10	High	4.83683	High	5.23596	High	5.62167	0
	RHPDYSVVLLLR	11	1	1	P02768		1467.85	3.89113e+08	3.70573e+08	3.66998e+08	0	0.0001157	High	4.66921	High	4.44722	High	4.39455	1
	AAFTECCQAADKAACLLPK	18	1	1	P02768	C6(Carbamidomethyl); C7(Carbamidomethyl); C15(Carbamidomethyl)	2125	748924092	703040047	7.39446e+08	0	0.004547	High	4.60305	High	4.76923	High	3.73228	1
	YKAAFTECCQAADK	11	1	1	P02768	C8(Carbamidomethyl); C9(Carbamidomethyl)	1662.73	1.92476e+08	2.04884e+08	2.24601e+08	0	5.706e-10	High	4.45985	High	4.57224	High	4.7509	1
	LCTVATLRETYGEMADCCAK	3	1	1	P02768	C2(Carbamidomethyl); C17(Carbamidomethyl); C18(Carbamidomethyl)	2349.03	7.93499e+06	7.40101e+06	7.25354e+06	0	0.004739	High	4.41922	High	3.07306	High	3.03286	1
	AEFAEVSKLVTDLTK	9	1	1	P02768		1650.9	1.68604e+08	1.54803e+08	1.70821e+08	0	0.002137	High	4.36618	High	4.31166	High	3.64351	1
	SHCIAEVENDEMPADLPSLAADFVESK	4	1	1	P02768	C3(Carbamidomethyl); M12(Oxidation)	2990.35	6.4896e+06	1.30755e+07	1.21001e+07	0	3.745e-07	High	4.277	High	3.65823	High	4.71597	0
	TCVADESAENCDK	42	1	1	P02768	C2(Carbamidomethyl); C11(Carbamidomethyl)	1498.58	343980	7.8693e+07	8.61767e+07	0	0.001032	High	4.22867	High	4.63126	High	4.51894	0
	VHTECCHGDLLECADDRADLAKYICENQDSISSK	8	1	1	P02768	C5(Carbamidomethyl); C6(Carbamidomethyl); C13(Carbamidomethyl); C25(Carbamidomethyl)	4009.75	4.37332e+08	4.23215e+08	395328950	0	9.23e-09	High	4.01315	High	3.74046	High	4.80801	2
	YICENQDSISSKLK	4	1	1	P02768	C3(Carbamidomethyl)	1684.83	2.56191e+06	5.95118e+07	2.7084e+06	0	0.009038	High	3.99645	High	4.15133	High	3.17728	1
	MPCAEDYLSVVLNQLCVLHEK	4	1	1	P02768	C3(Carbamidomethyl); C16(Carbamidomethyl)	2518.22	4.86926e+06	5.30498e+06	0	0	0.00522	High	3.91619	High	3.7516	High	2.95678	0
	AVMDDFAAFVEKCCK	2	1	1	P02768	C13(Carbamidomethyl); C14(Carbamidomethyl)	1790.79	2.06474e+06	0	0	0	0.008932	High	3.80095					1
	LKCASLQKFGER	15	1	1	P02768	C3(Carbamidomethyl)	1436.77	526937246	5.2933e+08	5.43218e+08	0	5.671e-05	High	3.65703	High	3.1495	High	3.69319	2
	LVNEVTEFAK	6	1	1	P02768		1149.62	2.98555e+08	3.05286e+08	2.97767e+08	0	0.007209	High	3.63937	High	3.12737	High	3.18422	0
	HPYFYAPELLFFAK	3	1	1	P02768		1742.9	2.174e+07	2.01408e+07	20510062	0	0.009038	High	3.61662	High	3.36054	High	3.22764	0
	YICENQDSISSK	18	1	1	P02768	C3(Carbamidomethyl)	1443.65	6.89991e+08	6.82358e+08	7.12274e+08	0	4.35e-07	High	3.58965	High	3.67016	High	3.79401	0
	TYETTLEKCCAAADPHECYAK	12	1	1	P02768	C9(Carbamidomethyl); C10(Carbamidomethyl); C18(Carbamidomethyl)	2518.08	3.11712e+08	2.88906e+08	294039313	0	2.125e-09	High	3.58938	High	3.83831	High	4.12758	1
	CCAAADPHECYAK	7	1	1	P02768	C1(Carbamidomethyl); C2(Carbamidomethyl); C10(Carbamidomethyl)	1552.6	1.82471e+07	249059232	2.80753e+08	0	0.004865	High	3.57793	High	1.99839	High	3.25115	0
	LKECCEKPLLEK	32	1	1	P02768	C4(Carbamidomethyl); C5(Carbamidomethyl)	1546.8	1412712890	1.3948e+09	1375005916	0	0.000928	High	3.5648	High	4.41544	High	3.55904	1
	AVMDDFAAFVEK	9	1	1	P02768		1342.64	2.71133e+08	2.53036e+08	2.88849e+08	0	0.001147	High	3.48039	High	4.04633	High	3.58375	0
	ATKEQLKAVMDDFAAFVEK	6	1	1	P02768		2141.1	9.57347e+07	1.10265e+08	9.19704e+07	0	0.004009	High	3.3918	High	1.89736	High	2.9885	2
	LVAASQAALGL	11	1	1	P02768		1013.6	7.43904e+08	6.85641e+08	6.70092e+08	0	9.12e-07	High	3.3522	High	3.04111	High	3.71765	0
	KVPQVSTPTLVEVSR	11	1	1	P02768		1639.94	1.19781e+09	1.17052e+09	1.21153e+09	0	0.004634	High	3.35196	High	3.41716	High	3.21058	1
	YTKKVPQVSTPTLVEVSR	15	1	1	P02768		2032.15	1371253053	1.35408e+09	1.41736e+09	0	0.002532	High	3.34661	High	3.40644	High	3.07386	2
	AAFTECCQAADK	13	1	1	P02768	C6(Carbamidomethyl); C7(Carbamidomethyl)	1371.57	172776920	176513248	243123579	0	0.00121	High	3.33148	High	3.43916	High	3.54021	0
	CASLQKFGER	27	1	1	P02768	C1(Carbamidomethyl)	1195.59	2.74607e+08	218992103	274786882	0	0.0001973	High	3.29929	High	2.94287	High	2.87943	1
	ETYGEMADCCAK	11	1	1	P02768	C9(Carbamidomethyl); C10(Carbamidomethyl)	1434.54	65035561	6.20574e+07	6.02436e+07	0	6.085e-06	High	3.26019	High	3.25996	High	3.371	0
	LVRPEVDVMCTAFHDNEETFLKK	11	1	1	P02768	C10(Carbamidomethyl)	2778.36	5.16313e+08	5.4012e+08	5.60962e+08	0	0.004238	High	3.23719	High	3.9529	High	3.46989	1
	VFDEFKPLVEEPQNLIKQNCELFEQLGEYKFQNALLVR	4	1	1	P02768	C20(Carbamidomethyl)	4625.39	5.34868e+08	0	0	0	0.02825	High	3.2323					2
	LAKTYETTLEK	19	1	1	P02768		1296.71	2.97641e+08	2.96709e+08	3.03285e+08	0	0.0002566	High	3.21277	High	3.37178	High	3.78022	1
	RMPCAEDYLSVVLNQLCVLHEK	4	1	1	P02768	C4(Carbamidomethyl); C17(Carbamidomethyl)	2674.33	0	5.98206e+07	7.08516e+07	0	4.41e-07	High	3.19466	High	2.51684	High	3.17041	1
	LAKTYETTLEKCCAAADPHECYAK	15	1	1	P02768	C12(Carbamidomethyl); C13(Carbamidomethyl); C21(Carbamidomethyl)	2830.29	3.40366e+08	3.36996e+08	3.46329e+08	0	0.0005734	High	3.18558	High	5.41004	High	3.82374	2
	KQTALVELVK	11	1	1	P02768		1128.7	4.61804e+07	3.85746e+07	3.64533e+07	0	0.003936	High	3.16224	High	3.90839	High	3.8827	1
	FKDLGEENFK	14	1	1	P02768		1226.61	6.92057e+08	676481504	6.75783e+08	0	1.286e-05	High	3.09013	High	2.78238	High	3.48219	1
	CCTESLVNR	12	1	1	P02768	C1(Carbamidomethyl); C2(Carbamidomethyl)	1138.5	110539604	1.15173e+08	0	0	0.008992	High	3.07553	High	2.79973	High	2.76534	0
	VPQVSTPTLVEVSR	6	1	1	P02768		1511.85	5.55916e+07	4.65898e+07	4.54141e+07	0	0.02046	High	3.06582	High	3.44586	High	3.44082	0
	AVMDDFAAFVEK	1	1	1	P02768	M3(Oxidation)	1358.63	6.69607e+06	0	0	0	0.01309	High	2.97586					0
	RMPCAEDYLSVVLNQLCVLHEKTPVSDR	6	1	1	P02768	C4(Carbamidomethyl); C17(Carbamidomethyl)	3329.65	3.13011e+07	7.31495e+07	2.71912e+07	0	0.03118	High	2.95817	High	2.45842	High	2.02472	2
	VHTECCHGDLLECADDRADLAK	12	1	1	P02768	C5(Carbamidomethyl); C6(Carbamidomethyl); C13(Carbamidomethyl)	2585.13	3.72291e+08	3.52763e+08	3.61757e+08	0	0.0004024	High	2.94847	High	2.95787	High	3.04667	1
	RHPYFYAPELLFFAK	7	1	1	P02768		1899	3.92558e+07	4.9453e+07	5.78642e+07	0	0.001014	High	2.91894	High	3.28286	High	2.20039	1
	MPCAEDYLSVVLNQLCVLHEKTPVSDRVTK	11	1	1	P02768	C3(Carbamidomethyl); C16(Carbamidomethyl)	3501.77	2.55409e+08	3.2802e+08	3.17004e+08	0	0.01201	High	2.83983	High	3.21667	High	3.19184	2
	RHPYFYAPELLFFAKR	11	1	1	P02768		2055.1	3.49426e+08	3.51804e+08	4.12391e+08	0	0.001435	High	2.83481	High	3.34024	High	3.11945	2
	LVRPEVDVMCTAFHDNEETFLKKYLYEIAR	10	1	1	P02768	C10(Carbamidomethyl)	3686.85	204063324	2.07337e+08	2.3993e+08	0	0.0007182	High	2.67523	High	2.47971	High	3.01482	2
	HPDYSVVLLLR	1	1	1	P02768		1311.74	6.02976e+06	0	0	0	0.004518	High	2.64352					0
	SLHTLFGDKLCTVATLRETYGEMADCCAK	4	1	1	P02768	C11(Carbamidomethyl); C26(Carbamidomethyl); C27(Carbamidomethyl)	3347.56	29339416	7.44001e+07	8.75548e+07	0	0.009363	High	2.57357	High	3.10764	High	2.41305	2
	YKAAFTECCQAADKAACLLPK	5	1	1	P02768	C8(Carbamidomethyl); C9(Carbamidomethyl); C17(Carbamidomethyl)	2416.15	3.77437e+08	3.58898e+07	3.68156e+08	0	1.338e-07	High	2.52703	High	2.35457	High	2.74756	2
	CCTESLVNRRPCFSALEVDETYVPK	4	1	1	P02768	C1(Carbamidomethyl); C2(Carbamidomethyl); C12(Carbamidomethyl)	3030.42	8.78074e+07	86796277	9.30752e+07	0	7.03e-05	High	2.44611	High	2.478	High	2.51948	1
	ADDKETCFAEEGKK	23	1	1	P02768	C7(Carbamidomethyl)	1627.73	3.8187e+07	2.7293e+07	3.47746e+07	0	0.0259	High	2.44268	High	3.19158	High	3.83887	2
	LDELRDEGKASSAK	27	1	1	P02768		1518.78	237488240	210928464	120676064	0	0.001908	High	2.39104	High	2.75753	High	2.52441	2
	LSQRFPKAEFAEVSK	8	1	1	P02768		1736.94	3.56338e+08	3.44572e+08	3.57124e+08	0	0.002741	High	2.38001	High	3.46869	High	3.05579	2
	TCVADESAENCDKSLHTLFGDKLCTVATLR	6	1	1	P02768	C2(Carbamidomethyl); C11(Carbamidomethyl); C24(Carbamidomethyl)	3411.61	1.59147e+08	1.41668e+08	1.61359e+08	0	0.004966	High	2.37558	High	3.31237	High	3.27307	2
	EQLKAVMDDFAAFVEK	4	1	1	P02768		1840.92	4.40242e+07	45908436	4.15869e+07	0	0.000318	High	2.30709	High	2.74711	High	2.85894	1
	QEPERNECFLQHKDDNPNLPR	7	1	1	P02768	C8(Carbamidomethyl)	2636.23	227066520	1.89227e+08	1.99261e+08	0	0.0162	High	2.19464	High	2.82921	High	2.6202	2
	QNCELFEQLGEYKFQNALLVR	6	1	1	P02768	C3(Carbamidomethyl)	2599.3	8.69168e+07	8.4091e+07	8.15551e+07	0	0.0009007	High	2.17583	High	3.05324	High	2.04531	1
	YICENQDSISSKLKECCEKPLLEK	4	1	1	P02768	C3(Carbamidomethyl); C16(Carbamidomethyl); C17(Carbamidomethyl)	2971.43	7.92343e+06	4628279	418193436	0	0.01328	High	2.17125	High	3.53471	High	1.49777	2
	FGERAFKAWAVAR	5	1	1	P02768		1508.81	3.87168e+07	4.26402e+07	4.39562e+07	0	1.312e-05	High	2.13945	High	1.85141	High	2.79055	2
	SHCIAEVENDEMPADLPSLAADFVESKDVCKNYAEAK	8	1	1	P02768	C3(Carbamidomethyl); C30(Carbamidomethyl)	4152.88	405350272	72067505	518489939	0	5.699e-05	High	2.12818	High	2.38744	High	3.67315	2
	SLHTLFGDKLCTVATLR	5	1	1	P02768	C11(Carbamidomethyl)	1932.04	1.69205e+08	153306329	1.46636e+08	0	0.01882	High	2.03788	High	3.00158	High	2.52932	1
	ALVLIAFAQYLQQCPFEDHVK	3	1	1	P02768	C14(Carbamidomethyl)	2490.29	1.11326e+07	8.03501e+06	5.39044e+06	0	0.02202	High	2.01004	High	2.11507	High	2.64888	0
	SHCIAEVENDEMPADLPSLAADFVESKDVCK	5	1	1	P02768	C3(Carbamidomethyl); C30(Carbamidomethyl)	3476.57	1.83038e+08	229956917	2.10241e+08	0	0.0138	High	1.89139	High	1.25179	High	1.85186	1
	AACLLPKLDELRDEGK	4	1	1	P02768	C3(Carbamidomethyl)	1827.97	2.19534e+08	2.04448e+08	2.07157e+08	0	0.01509	High	1.82746	High	2.26859	High	2.02947	2
	LVNEVTEFAKTCVADESAENCDK	1	1	1	P02768	C12(Carbamidomethyl); C21(Carbamidomethyl)	2629.19	0	0	0	0	0.001603			High	4.43324			1
	NECFLQHKDDNPNLPR	1	1	1	P02768	C3(Carbamidomethyl)	1996.93	0	0	3.97284e+06	0	0.0003607					High	3.36646	1
	HPYFYAPELLFFAKR	1	1	1	P02768		1899	0	0	89126460	0	0.001264					High	2.2244	1
	ADLAKYICENQDSISSK	1	1	1	P02768	C8(Carbamidomethyl)	1941.93	0	0	8.07061e+06	0	0.000762					High	1.99499	1
	LVTDLTKVHTECCHGDLLECADDRADLAK	3	1	1	P02768	C12(Carbamidomethyl); C13(Carbamidomethyl); C20(Carbamidomethyl)	3355.58	1.83444e+07	1.54471e+07	1.52386e+07	0.001	0.05399	High	2.40735	High	2.30447	High	1.9298	2
	QIKKQTALVELVK	9	1	1	P02768		1497.94	2.51886e+08	2.44936e+08	2.31673e+08	0.001	0.005659	High	2.28642	High	3.01261	High	2.90115	2
	TCVADESAENCDKSLHTLFGDK	5	1	1	P02768	C2(Carbamidomethyl); C11(Carbamidomethyl)	2497.1	6.19126e+06	77666677	5.1684e+06	0.001	0.04835	High	1.97046	High	1.74579	High	1.84854	1
	KVPQVSTPTLVEVSRNLGK	3	1	1	P02768		2052.19	1.21292e+08	102607710	1.00877e+08	0.001	0.008443	High	1.4251	High	1.30291	High	1.74346	2
	QTALVELVKHKPK	1	1	1	P02768		1490.91	0	3.65874e+07	0	0.001	0.05074			High	1.70269			1
	ECCEKPLLEK	4	1	1	P02768	C2(Carbamidomethyl); C3(Carbamidomethyl)	1305.62	7.94073e+07	4.20007e+07	0	0.002	0.01256	High	1.67637	High	1.54441	High	1.78381	0
	QTALVELVK	2	1	1	P02768		1000.61	0	2.23605e+08	0	0.002	0.05923			High	2.0209			0
	MPCAEDYLSVVLNQLCVLHEKTPVSDR	1	1	1	P02768	C3(Carbamidomethyl); C16(Carbamidomethyl)	3173.56	0	0	1.94514e+06	0.003	0.02346					High	2.04935	1
	RYKAAFTECCQAADK	3	1	1	P02768	C9(Carbamidomethyl); C10(Carbamidomethyl)	1818.83	1.82105e+07	1.76838e+07	1.78399e+07	0.004	0.07229	High	2.6433	High	2.92603	High	2.95762	2
	SHCIAEVENDEMPADLPSLAADFVESKDVCK	1	1	1	P02768	C3(Carbamidomethyl); M12(Oxidation); C30(Carbamidomethyl)	3492.59	1.20273e+07	0	0	0.004	0.1067	High	2.30928					1
	CCAAADPHECYAKVFDEFKPLVEEPQNLIK	1	1	1	P02768	C1(Carbamidomethyl); C2(Carbamidomethyl); C10(Carbamidomethyl)	3578.69	0	7.33962e+07	0	0.004	0.06945			High	1.82011			1
	ALVLIAFAQYLQQCPFEDHVKLVNEVTEFAK	2	1	1	P02768	C14(Carbamidomethyl)	3620.89	5.25987e+07	0	0	0.006	0.131	High	1.70716					1
	FPKAEFAEVSKLVTDLTK	1	1	1	P02768		2023.12	0	2.74007e+06	0	0.007	0.1381			High	1.59108			2
	KLVAASQAALGL	1	1	1	P02768		1141.7	4.69777e+07	0	0	0.008	0.1386	High	2.65074					1
P00568	Adenylate kinase isoenzyme 1 OS=Homo sapiens OX=9606 GN=AK1 PE=1 SV=3 - [KAD1_HUMAN]	82.47	1	28	28	167	5.00792e+08	4.78743e+08	5.02373e+08	136.796	79.38	25	56	137.962	80.41	25	56	117.521	77.84	23	55	194	21.6213	8.63135
	Sequence	# PSMs	# Proteins	# Protein Groups	Protein Group Accessions	Modifications	MH+ [Da]	A5: Area	B5: Area	C5: Area	q-Value	PEP	A2	XCorr A2	B2	XCorr B2	C2	XCorr C2	# Missed Cleavages
	IGQPTLLLYVDAGPETMTQR	11	1	1	P00568		2203.15	107540025	1.20016e+08	106003852	0	4.75e-10	High	4.9479	High	4.72235	High	5.28957	0
	RIGQPTLLLYVDAGPETMTQR	6	1	1	P00568		2359.26	8.69858e+07	7.83304e+07	8.70411e+07	0	0.002027	High	4.19393	High	3.7106	High	3.95145	1
	KVNAEGSVDSVFSQVCTHLDALK	12	1	1	P00568	C16(Carbamidomethyl)	2504.25	4.42312e+08	3.74406e+08	4.43825e+08	0	0.0001213	High	3.95744	High	4.31756	High	4.08121	1
	EVQQGEEFERRIGQPTLLLYVDAGPETMTQR	8	1	1	P00568		3590.8	6.42363e+07	6.04733e+07	6.62523e+07	0	0.00039	High	3.75749	High	2.14943	High	2.50259	2
	YGYTHLSTGDLLR	10	1	1	P00568		1495.76	519163096	445930406	493844090	0	0.0213	High	3.5614	High	3.96873	High	3.51056	0
	VNAEGSVDSVFSQVCTHLDALK	6	1	1	P00568	C15(Carbamidomethyl)	2376.16	1.18272e+08	1.40437e+08	134249113	0	0.002395	High	3.31964	High	3.65722	High	3.52383	0
	VNTSKGFLIDGYPREVQQGEEFER	3	1	1	P00568		2798.38	1.12755e+08	1.12846e+08	1.15504e+08	0	1.5e-05	High	3.30784	High	2.25747	High	3.40717	2
	GIVRKVNAEGSVDSVFSQVCTHLDALK	5	1	1	P00568	C20(Carbamidomethyl)	2929.53	9.1069e+07	9.93233e+07	1.16665e+08	0	3.744e-07	High	3.29507	High	2.92522	High	3.60064	2
	EVQQGEEFER	21	1	1	P00568		1250.56	1.17083e+08	101130421	1.14214e+08	0	0.01242	High	3.29186	High	3.02352	High	2.77641	0
	IIFVVGGPGSGKGTQCEK	10	1	1	P00568	C16(Carbamidomethyl)	1833.96	5.409e+08	5.5857e+08	569450390	0	1.267e-08	High	3.29132	High	3.50842	High	4.06166	1
	ATEPVIAFYEK	2	1	1	P00568		1267.66	6.73782e+07	6.35339e+07	0	0	0.008084	High	2.96186	High	1.97734			0
	YGYTHLSTGDLLRSEVSSGSAR	7	1	1	P00568		2356.16	417225687	4.31728e+08	406816374	0	0.0006177	High	2.85502	High	3.07515	High	2.36508	1
	GFLIDGYPREVQQGEEFER	4	1	1	P00568		2269.09	38022068	3.93404e+07	4.28049e+07	0	7.159e-09	High	2.79257	High	3.10592	High	3.9539	1
	LETYYKATEPVIAFYEK	4	1	1	P00568		2065.06	53662787	5.07161e+07	54425661	0	0.02596	High	2.78067	High	2.23971	High	2.20151	1
	GQLVPLETVLDMLR	3	1	1	P00568		1583.88	1.62142e+06	1.83216e+06	2.74041e+06	0	0.01451	High	2.66924	High	3.01168	High	3.4665	0
	IVQKYGYTHLSTGDLLR	6	1	1	P00568		1964.07	2.93051e+08	2.86312e+08	2.8956e+08	0	2.406e-05	High	2.60713	High	3.19036	High	2.21444	1
	IIFVVGGPGSGKGTQCEKIVQK	5	1	1	P00568	C16(Carbamidomethyl)	2302.26	3.90808e+08	2.61338e+07	4.099e+08	0	0.01864	High	2.58915	High	1.65348	High	2.22941	2
	TKIIFVVGGPGSGKGTQCEK	9	1	1	P00568	C18(Carbamidomethyl)	2063.1	112823812	1.41503e+08	125032268	0	9.092e-06	High	2.58834	High	2.76757	High	3.51801	2
	LETYYKATEPVIAFYEKR	7	1	1	P00568		2221.16	4.33196e+07	1.95955e+08	1.96493e+08	0	0.0004545	High	2.53353	High	2.92712	High	3.05125	2
	IVQKYGYTHLSTGDLLRSEVSSGSAR	6	1	1	P00568		2824.47	9.22475e+07	9.20408e+07	9.3379e+07	0	0.007344	High	2.32782	High	3.12085	High	2.3738	2
	ATEPVIAFYEKR	2	1	1	P00568		1423.76	1.78933e+07	0	1.57273e+07	0	0.03	High	2.2807			High	2.12875	1
	IGQPTLLLYVDAGPETMTQRLLK	1	1	1	P00568		2557.41	1.22495e+07	0	0	0	0.01495	High	1.58696					1
	VNTSKGFLIDGYPR	8	1	1	P00568		1566.83	2.02248e+08	197515279	1.90869e+08	0.001	0.003286	High	3.41786	High	2.98703	High	3.83368	1
	EVQQGEEFERR	4	1	1	P00568		1406.67	2.37048e+08	2.14219e+08	2.04301e+08	0.001	0.03858	High	1.79485	High	1.5151	High	1.72578	1
	EVQQGEEFERRIGQPTLLLYVDAGPETMTQR	1	1	1	P00568	M28(Oxidation)	3606.8	0	3.35654e+06	0	0.001	0.04912			High	2.72362			2
	RLETYYKATEPVIAFYEK	3	1	1	P00568		2221.16	2.11884e+07	0	2.50421e+07	0.003	0.02456	High	2.11343			High	2.76684	2
	DAMVAKVNTSKGFLIDGYPR	1	1	1	P00568		2182.14	0	4.88231e+06	0	0.004	0.07813			High	3.57335			2
	GFLIDGYPREVQQGEEFERR	1	1	1	P00568		2425.19	0	17393665	0	0.006	0.1213			High	2.28796			2
	TKIIFVVGGPGSGK	1	1	1	P00568		1359.8	0	1.18008e+07	0	0.008	0.1523			High	2.82922			1
P80297	Metallothionein-1X OS=Homo sapiens OX=9606 GN=MT1X PE=1 SV=1 - [MT1X_HUMAN]	81.97	1	2	3	56	7.17195e+07	7.769e+07	1.18716e+08	51.0271	81.97	3	17	57.879	81.97	3	19	62.0197	49.18	2	20	61	6.06325	7.95752
	Sequence	# PSMs	# Proteins	# Protein Groups	Protein Group Accessions	Modifications	MH+ [Da]	A5: Area	B5: Area	C5: Area	q-Value	PEP	A2	XCorr A2	B2	XCorr B2	C2	XCorr C2	# Missed Cleavages
	CAQGCICKGTSDKCSCCA	19	1	1	P80297	C1(Carbamidomethyl); C5(Carbamidomethyl); C7(Carbamidomethyl); C14(Carbamidomethyl); C16(Carbamidomethyl); C17(Carbamidomethyl)	2122.79	1.20096e+08	1.22041e+08	128002589	0	0.00442	High	4.24684	High	3.5664	High	3.92744	2
	SCCSCCPVGCAK	35	2	2	P80297;P02795	C2(Carbamidomethyl); C3(Carbamidomethyl); C5(Carbamidomethyl); C6(Carbamidomethyl); C10(Carbamidomethyl)	1445.51	9.37199e+07	1.09492e+08	1.0943e+08	0	0.01952	High	3.75134	High	3.70259	High	3.5112	0
	MDPNCSCSPVGSCACAGSCK	2	1	1	P80297	C5(Carbamidomethyl); C7(Carbamidomethyl); C13(Carbamidomethyl); C15(Carbamidomethyl); C19(Carbamidomethyl)	2204.8	1.34245e+06	1.53766e+06	0	0	0.01704	High	2.71439	High	3.7104			0
P02795	Metallothionein-2 OS=Homo sapiens OX=9606 GN=MT2A PE=1 SV=1 - [MT2_HUMAN]	81.97	1	2	3	55	6.76536e+07	7.44788e+07	7.74988e+07	63.9819	81.97	3	18	58.0317	81.97	3	18	58.9231	81.97	3	19	61	6.0372	7.82568
	Sequence	# PSMs	# Proteins	# Protein Groups	Protein Group Accessions	Modifications	MH+ [Da]	A5: Area	B5: Area	C5: Area	q-Value	PEP	A2	XCorr A2	B2	XCorr B2	C2	XCorr C2	# Missed Cleavages
	MDPNCSCAAGDSCTCAGSCK	4	1	1	P02795	C5(Carbamidomethyl); C7(Carbamidomethyl); C13(Carbamidomethyl); C15(Carbamidomethyl); C19(Carbamidomethyl)	2208.76	1.34011e+06	1.96507e+06	913687	0	0.002452	High	4.99213	High	3.20982	High	3.86387	0
	CAQGCICKGASDKCSCCA	16	1	1	P02795	C1(Carbamidomethyl); C5(Carbamidomethyl); C7(Carbamidomethyl); C14(Carbamidomethyl); C16(Carbamidomethyl); C17(Carbamidomethyl)	2092.78	1.07901e+08	1.1198e+08	1.22153e+08	0	0.002014	High	4.3793	High	4.11458	High	3.32038	2
	SCCSCCPVGCAK	35	2	2	P80297;P02795	C2(Carbamidomethyl); C3(Carbamidomethyl); C5(Carbamidomethyl); C6(Carbamidomethyl); C10(Carbamidomethyl)	1445.51	9.37199e+07	1.09492e+08	1.0943e+08	0	0.01952	High	3.75134	High	3.70259	High	3.5112	0
P62937	Peptidyl-prolyl cis-trans isomerase A OS=Homo sapiens OX=9606 GN=PPIA PE=1 SV=2 - [PPIA_HUMAN]	80.61	1	12	12	45	2.46418e+08	2.38243e+08	2.26291e+08	32.8281	69.7	10	13	41.3565	58.79	9	16	37.8104	69.7	11	16	165	18.0009	7.81104
	Sequence	# PSMs	# Proteins	# Protein Groups	Protein Group Accessions	Modifications	MH+ [Da]	A5: Area	B5: Area	C5: Area	q-Value	PEP	A2	XCorr A2	B2	XCorr B2	C2	XCorr C2	# Missed Cleavages
	HTGPGILSMANAGPNTNGSQFFICTAK	3	1	1	P62937	C24(Carbamidomethyl)	2791.34	3.02004e+07	2.95532e+07	3.24511e+07	0	0.01606	High	4.04624	High	4.79141	High	4.74157	0
	SIYGEKFEDENFILK	5	1	1	P62937		1831.92	1.80715e+08	1.72117e+08	9.48497e+06	0	8.547e-10	High	4.00168	High	3.49584	High	5.06636	1
	VKEGMNIVEAMER	6	1	1	P62937		1505.75	158610888	151495440	164050056	0	8.047e-06	High	3.69226	High	3.79984	High	3.88379	1
	KITIADCGQLE	7	1	1	P62937	C7(Carbamidomethyl)	1247.63	3.99928e+08	3.91116e+08	3.93154e+08	0	0.002252	High	3.55241	High	3.46413	High	3.38753	1
	ITIADCGQLE	3	1	1	P62937	C6(Carbamidomethyl)	1119.54	24018995	2.14524e+07	21896451	0	0.03236	High	3.54576	High	3.18703	High	3.09968	0
	EGMNIVEAMER	3	1	1	P62937		1278.58	6.72027e+07	6.10761e+07	6.34318e+07	0	0.01933	High	2.82782	High	3.15068	High	2.78811	0
	VSFELFADKVPKTAENFR	5	1	1	P62937		2098.1	1.86594e+07	1.16142e+08	1.21669e+08	0	9.842e-07	High	2.63127	High	2.54035	High	2.97614	2
	TEWLDGKHVVFGK	5	1	1	P62937		1515.8	3.96589e+07	3.87325e+07	3.81184e+07	0	3.679e-05	High	1.9909	High	2.48439	High	1.91781	1
	HTGPGILSMANAGPNTNGSQFFICTAK	1	1	1	P62937	M9(Oxidation); C24(Carbamidomethyl)	2807.33	0	4.76554e+06	0	0	0.01115			High	4.54107			0
	VSFELFADKVPK	3	1	1	P62937		1379.76	7.68308e+07	8.09385e+07	8.1352e+07	0.001	0.04205	High	2.00266	High	1.89999	High	1.51156	1
	IIPGFMCQGGDFTR	2	1	1	P62937	C7(Carbamidomethyl)	1598.75	0	0	1.54039e+07	0.001	0.01004					High	2.72183	0
	VKEGMNIVEAMERFGSR	1	1	1	P62937		1952.97	0	0	9.78304e+06	0.002	0.02104					High	2.73684	2
	ALSTGEKGFGYKGSCFHR	1	1	1	P62937	C15(Carbamidomethyl)	2001.96	4.4107e+06	0	0	0.008	0.1441	High	1.43643					2
P12277	Creatine kinase B-type OS=Homo sapiens OX=9606 GN=CKB PE=1 SV=1 - [KCRB_HUMAN]	70.6	1	29	29	216	1.33644e+09	9.51024e+08	1.16644e+09	147.734	58.79	22	68	137.482	68.5	26	72	147.966	70.08	27	76	381	42.6173	5.59229
	Sequence	# PSMs	# Proteins	# Protein Groups	Protein Group Accessions	Modifications	MH+ [Da]	A5: Area	B5: Area	C5: Area	q-Value	PEP	A2	XCorr A2	B2	XCorr B2	C2	XCorr C2	# Missed Cleavages
	GTGGVDTAAVGGVFDVSNADR	7	1	1	P12277		1964.94	9.49472e+07	7.90241e+07	9.0122e+07	0	4.658e-12	High	5.44183	High	5.31574	High	5.6995	0
	LRFPAEDEFPDLSAHNNHMAK	27	1	1	P12277		2439.16	1.08029e+09	1.10073e+09	1.14437e+09	0	0.002222	High	4.95155	High	4.0727	High	4.15996	1
	SMTEAEQQQLIDDHFLFDKPVSPLLLASGMAR	16	1	1	P12277		3587.8	9.1905e+08	8.85418e+08	8.84399e+08	0	0.01147	High	4.81378	High	3.15839	High	2.70604	0
	LAVEALSSLDGDLAGR	3	1	1	P12277		1586.84	6.35707e+07	5.14738e+07	53724636	0	2.581e-05	High	4.71026	High	4.57929	High	4.34539	0
	HGGYKPSDEHKTDLNPDNLQGGDDLDPNYVLSSR	8	1	1	P12277		3753.75	7.07401e+07	8.66924e+08	6.41799e+07	0	0.002328	High	4.23205	High	3.81458	High	3.02263	1
	LEQGQAIDDLMPAQK	7	1	1	P12277		1656.83	9.75201e+07	7.25638e+07	7.28925e+07	0	0.0004167	High	3.99195	High	4.37967	High	4.09822	0
	RGTGGVDTAAVGGVFDVSNADR	4	1	1	P12277		2121.04	9.11267e+07	8.75938e+07	7.82977e+07	0	0.0002439	High	3.8674	High	4.19023	High	4.15178	1
	LAVEALSSLDGDLAGRYYALK	16	1	1	P12277		2225.19	2.85089e+08	278445108	2.59555e+08	0	0.001824	High	3.82329	High	4.57399	High	3.14817	1
	RAIEKLAVEALSSLDGDLAGR	6	1	1	P12277		2184.2	3.65137e+07	3.77188e+07	3.34244e+07	0	0.001136	High	3.74358	High	2.97524	High	3.48543	2
	LEQGQAIDDLMPAQK	2	1	1	P12277	M11(Oxidation)	1672.82	5.19973e+06	0	4.4272e+06	0	0.0008022	High	3.64954			High	4.04116	0
	VLTPELYAELR	10	1	1	P12277		1303.73	1.52209e+09	8.06963e+07	1.47054e+09	0	0.001965	High	3.4684	High	3.77326	High	3.20875	0
	AIEKLAVEALSSLDGDLAGR	3	1	1	P12277		2028.1	8.04446e+07	8.40924e+07	8.44866e+07	0	0.003558	High	3.41378	High	2.47534	High	2.46812	1
	AIEKLAVEALSSLDGDLAGRYYALK	14	1	1	P12277		2666.45	1.54539e+08	2.60118e+08	2.77199e+08	0	0.00309	High	3.30905	High	3.99913	High	2.94077	2
	FPAEDEFPDLSAHNNHMAK	22	1	1	P12277		2169.97	6.10612e+08	5.86816e+08	6.24229e+08	0	0.007474	High	3.25713	High	3.64595	High	3.78536	0
	LRFPAEDEFPDLSAHNNHMAK	5	1	1	P12277	M19(Oxidation)	2455.15	115058132	1.04623e+08	1.15724e+08	0	8.754e-05	High	3.15165	High	2.40863	High	3.44973	1
	SIRGFCLPPHCSR	15	1	1	P12277	C6(Carbamidomethyl); C11(Carbamidomethyl)	1586.77	1.17443e+08	1.20367e+08	1.24494e+08	0	0.00397	High	3.13732	High	2.92583	High	2.60257	1
	FCTGLTQIETLFK	3	1	1	P12277	C2(Carbamidomethyl)	1557.8	70617339	7.3852e+07	7.17369e+07	0	0.005727	High	3.03925	High	3.26226	High	3.11208	0
	GIWHNDNKTFLVWVNEEDHLR	4	1	1	P12277		2622.29	3.44774e+07	2.99387e+07	3.64813e+07	0	0.00665	High	2.9908	High	1.6801	High	1.53033	1
	YYALKSMTEAEQQQLIDDHFLFDKPVSPLLLASGMAR	4	1	1	P12277		4226.15	1.62891e+07	0	2.00497e+07	0	3.479e-08	High	2.76589	High	3.65799	High	4.39991	1
	VLTPELYAELRAK	5	1	1	P12277		1502.86	1.40694e+09	6.47754e+07	7.11132e+07	0	0.0117	High	2.7328	High	2.55473	High	2.51336	1
	LQKRGTGGVDTAAVGGVFDVSNADR	3	1	1	P12277		2490.27	4.84991e+07	6.00304e+07	5.50843e+07	0	0.008442	High	2.2606	High	1.95055	High	1.98473	2
	SMTEAEQQQLIDDHFLFDKPVSPLLLASGMARDWPDAR	6	1	1	P12277		4328.13	165192333	2.60591e+08	3.05015e+08	0	0.002386	High	2.25715	High	1.72906	High	2.02289	1
	SMTEAEQQQLIDDHFLFDKPVSPLLLASGMAR	4	1	1	P12277	M2(Oxidation)	3603.78	0	6.52967e+07	7.05633e+07	0	0.002281			High	2.4763	High	2.60331	0
	FPAEDEFPDLSAHNNHMAK	1	1	1	P12277	M17(Oxidation)	2185.97	4447234	0	0	0.001	0.0468	High	2.49883					0
	GFCLPPHCSRGER	7	1	1	P12277	C3(Carbamidomethyl); C8(Carbamidomethyl)	1572.72	5.42967e+07	1.59243e+08	1.66437e+08	0.001	0.01017	High	1.18908	High	1.77877	High	1.60267	1
	LRFPAEDEFPDLSAHNNHMAKVLTPELYAELR	3	1	1	P12277		3723.85	0	2.2545e+07	1.79948e+07	0.001	0.04053			High	3.35119	High	3.01567	2
	HGGYKPSDEHKTDLNPDNLQGGDDLDPNYVLSSRVR	2	1	1	P12277		4008.92	0	6.0035e+07	0	0.001	0.03212			High	2.29209			2
	SIRGFCLPPHCSRGER	2	1	1	P12277	C6(Carbamidomethyl); C11(Carbamidomethyl)	1928.94	0	8.11345e+07	8.78902e+07	0.001	0.008788			High	1.99679	High	2.17905	2
	SKDYEFMWNPHLGYILTCPSNLGTGLR	2	1	1	P12277	C18(Carbamidomethyl)	3169.53	0	8.87902e+07	8.90177e+07	0.004	0.06981			High	2.64994	High	1.73076	1
	GFCLPPHCSR	1	1	1	P12277	C3(Carbamidomethyl); C8(Carbamidomethyl)	1230.55	0	0	6.24009e+07	0.005	0.03555					High	1.84012	0
	FCTGLTQIETLFKSK	1	1	1	P12277	C2(Carbamidomethyl)	1772.93	15676874	0	0	0.006	0.1303	High	1.96756					1
	LLIEMEQRLEQGQAIDDLMPAQK	1	1	1	P12277		2669.37	0	0	5.11031e+07	0.007	0.05533					High	2.06172	1
	GGNMKEVFTR	2	1	1	P12277		1138.57	0	1.0127e+07	2.23445e+07	0.008	0.1499			High	2.36213	High	2.29612	1
P23527	Histone H2B type 1-O OS=Homo sapiens OX=9606 GN=HIST1H2BO PE=1 SV=3 - [H2B1O_HUMAN]	69.84	3	2	13	145	3.43492e+09	3.41253e+09	3.44493e+09	130.289	68.25	11	46	117.143	69.05	10	48	126.636	69.84	12	51	126	13.8976	10.3159
	Sequence	# PSMs	# Proteins	# Protein Groups	Protein Group Accessions	Modifications	MH+ [Da]	A5: Area	B5: Area	C5: Area	q-Value	PEP	A2	XCorr A2	B2	XCorr B2	C2	XCorr C2	# Missed Cleavages
	AMGIMNSFVNDIFER	19	10	3	P23527;P58876;Q8N257		1743.82	4.98484e+08	5.53816e+08	5.26333e+08	0	8.511e-05	High	5.53676	High	4.75735	High	4.8806	0
	AMGIMNSFVNDIFER	20	10	3	P23527;P58876;Q8N257	M2(Oxidation)	1759.82	1.13833e+08	1.10365e+08	1.02721e+08	0	0.0001468	High	5.07849	High	4.73973	High	4.71792	0
	AMGIMNSFVNDIFER	4	10	3	P23527;P58876;Q8N257	M2(Oxidation); M5(Oxidation)	1775.81	51162378	40862619	6.00897e+07	0	0.004905	High	4.36855	High	4.00692	High	4.33419	0
	HAVSEGTKAVTKYTSSK	21	10	3	P23527;P58876;Q8N257		1793.94	2.54909e+09	2.63456e+09	2.57596e+09	0	0.00243	High	4.01566	High	3.64363	High	3.33303	2
	AMGIMNSFVNDIFERIAGEASR	6	9	2	P23527;P58876	M2(Oxidation)	2444.18	1.9576e+07	4.17045e+07	5.59859e+07	0	0.0004351	High	3.42871	High	2.10235	High	3.43219	1
	VLKQVHPDTGISSK	12	10	3	P23527;P58876;Q8N257		1508.85	3.77821e+08	3.64385e+08	3.79271e+08	0	6.926e-05	High	3.27662	High	3.17395	High	3.32519	1
	AMGIMNSFVNDIFERIAGEASR	6	9	2	P23527;P58876		2428.18	9.76939e+07	5.50036e+07	6.56178e+07	0	0.0006227	High	3.23303	High	2.83181	High	1.81901	1
	STITSREIQTAVR	13	9	2	P23527;P58876		1461.8	1.53994e+09	1.64501e+09	1.5435e+09	0	0.03102	High	3.04966	High	2.89202	High	3.23181	1
	EIQTAVRLLLPGELAK	11	9	2	P23527;P58876		1751.05	1.07399e+09	9.86635e+08	1.04951e+09	0	0.01705	High	2.77269	High	3.02699	High	2.75258	1
	STITSREIQTAVRLLLPGELAK	8	9	2	P23527;P58876		2396.4	6.53545e+08	7.15293e+08	6.56429e+08	0	7.584e-05	High	2.76303	High	1.63846	High	2.05809	2
	RSTITSREIQTAVR	2	9	2	P23527;P58876		1617.9	3.46118e+07	0	3.37762e+07	0	0.01973	High	2.69082			High	1.71061	2
	LLLPGELAK	12	10	3	P23527;P58876;Q8N257		953.606	6.21571e+09	5.95803e+09	6.21532e+09	0	0.01828	High	2.01586	High	2.3293	High	1.98876	0
	SRKESYSIYVYK	2	3	1	P23527		1522.79	0	5.28176e+07	5.38316e+07	0	0.000815			High	2.36783	High	2.59584	2
	AMGIMNSFVNDIFERIAGEASR	2	9	2	P23527;P58876	M2(Oxidation); M5(Oxidation)	2460.18	0	27508434	2.61506e+07	0	0.01426			High	1.47079	High	1.26139	1
	LLLPGELAKHAVSEGTK	4	10	3	P23527;P58876;Q8N257		1763.01	0	1.20491e+08	1.29912e+08	0.001	0.02113			High	1.81921	High	1.78333	1
	HAVSEGTKAVTK	1	3	1	P23527		1227.67	0	0	0	0.002	0.05988	High	2.85624					1
	KESYSIYVYK	2	4	2	P23527;Q8N257		1279.66	1.61124e+07	0	1.34154e+07	0.002	0.0169	High	2.41959			High	2.84703	1
Q13885	Tubulin beta-2A chain OS=Homo sapiens OX=9606 GN=TUBB2A PE=1 SV=1 - [TBB2A_HUMAN]	69.21	1	2	31	205	6.9145e+08	6.84819e+08	7.11931e+08		0				0			186.73	62.25	27	70	445	49.875	4.89404
	Sequence	# PSMs	# Proteins	# Protein Groups	Protein Group Accessions	Modifications	MH+ [Da]	A5: Area	B5: Area	C5: Area	q-Value	PEP	A2	XCorr A2	B2	XCorr B2	C2	XCorr C2	# Missed Cleavages
	SGPFGQIFRPDNFVFGQSGAGNNWAK	26	4	4	Q9BVA1;P68371;P07437;Q13885		2798.34	7.3224e+08	755639296	7.52502e+08	0	0.0002555	High	5.85823	High	6.30598	High	5.71143	0
	MREIVHIQAGQCGNQIGAK	18	5	5	P68371;Q9BVA1;P07437;Q13885;Q13509	C12(Carbamidomethyl)	2110.07	810786814	8.30833e+08	8.85272e+08	0	7.285e-05	High	5.16433	High	4.62978	High	4.60301	1
	MSMKEVDEQMLNVQNK	6	4	4	Q13885;P68371;P07437;Q9BVA1		1923.9	1.60833e+08	167910944	1.59259e+08	0	8.198e-12	High	5.0777	High	4.90456	High	5.56675	1
	EVDEQMLNVQNK	6	4	4	Q9BVA1;P68371;P07437;Q13885		1446.69	1.78742e+07	1.78774e+07	1.90335e+07	0	0.008074	High	4.20749	High	4.49517	High	4.30774	0
	MREIVHIQAGQCGNQIGAK	8	5	5	Q9BVA1;P07437;P68371;Q13885;Q13509	M1(Oxidation); C12(Carbamidomethyl)	2126.07	1.74964e+07	1.1771e+08	1.11904e+08	0	0.02416	High	4.13328	High	3.42821	High	3.55187	1
	LHFFMPGFAPLTSR	13	5	5	Q9BVA1;P68371;P07437;Q13885;Q9BUF5		1620.84	363141550	3.68684e+08	4.64826e+08	0	0.0007652	High	3.91653	High	3.66173	High	3.55211	0
	NSSYFVEWIPNNVK	9	6	6	Q13885;Q13509;P68371;P07437;Q9BUF5;Q9BVA1		1696.84	149269886	133856675	1.71671e+08	0	1.69e-06	High	3.80886	High	3.09342	High	4.04907	0
	ISEQFTAMFR	6	5	5	Q9BVA1;P68371;P07437;Q13885;Q13509		1229.6	9.88469e+07	9.64544e+07	9.13089e+07	0	0.0009045	High	3.80856	High	4.08625	High	3.69389	0
	LAVNMVPFPR	5	6	6	Q9BVA1;P68371;P07437;Q13885;Q13509;Q9BUF5		1143.64	4.03627e+08	3.73777e+08	3.67514e+08	0	0.001102	High	3.71225	High	3.28382	High	3.33566	0
	AILVDLEPGTMDSVR	12	4	4	Q9BVA1;P07437;Q13885;Q13509		1615.84	5.31323e+08	4.67984e+08	4.98017e+08	0	0.0001504	High	3.5922	High	3.6058	High	3.45398	0
	MSMKEVDEQMLNVQNK	3	4	4	Q9BVA1;P68371;P07437;Q13885	M3(Oxidation)	1939.89	4.08536e+06	0	6.61951e+06	0	0.0252	High	3.569			High	3.45055	1
	ALTVPELTQQMFDSK	8	2	2	Q9BVA1;Q13885		1707.87	8.69916e+07	0	7.78459e+07	0	0.003394	High	3.48133	High	3.59247	High	3.32695	0
	EIVHIQAGQCGNQIGAK	3	5	5	P68371;Q13885;Q13509;P07437;Q9BVA1	C10(Carbamidomethyl)	1822.93	3.13482e+07	2.75969e+07	3.24523e+07	0	8.683e-10	High	3.45815	High	3.06115	High	4.44394	0
	IMNTFSVMPSPK	5	3	3	Q9BVA1;Q13885;Q9BUF5		1351.68	3.94354e+07	3.95705e+07	4.08522e+07	0	0.00503	High	3.22446	High	4.08924	High	4.00027	0
	NMMAACDPR	11	6	6	Q9BVA1;P68371;P07437;Q13885;Q13509;Q9BUF5	C6(Carbamidomethyl)	1065.43	8.55966e+07	7.74123e+07	8.28269e+07	0	0.006923	High	3.10808	High	3.01791	High	2.98447	0
	ESESCDCLQGFQLTHSLGGGTGSGMGTLLISK	4	2	2	Q9BVA1;Q13885	C5(Carbamidomethyl); C7(Carbamidomethyl)	3327.54	1.07139e+07	1.01177e+07	8.14496e+06	0	0.01158	High	3.03679	High	3.32834	High	3.16005	0
	AILVDLEPGTMDSVR	3	4	4	Q13885;Q13509;P07437;Q9BVA1	M11(Oxidation)	1631.83	73402759	6.48935e+07	6.29946e+07	0	8.346e-07	High	2.81846	High	3.50307	High	3.94768	0
	GHYTEGAELVDSVLDVVR	5	5	5	Q9BVA1;P68371;P07437;Q13885;Q13509		1958.99	6.09635e+07	5.70881e+07	5.64916e+07	0	0.01894	High	2.79431	High	3.32579	High	2.96409	0
	LAVNMVPFPR	2	6	6	Q9BVA1;P68371;P07437;Q13885;Q13509;Q9BUF5	M5(Oxidation)	1159.64	1.32394e+07	1.46039e+07	0	0	0.0155	High	2.70642	High	2.98918			0
	IREEYPDRIMNTFSVMPSPK	4	2	2	Q9BVA1;Q13885		2410.2	3.2402e+07	311606804	3.2494e+07	0	0.007968	High	2.67771	High	3.36239	High	1.838	2
	GHYTEGAELVDSVLDVVRK	8	5	5	Q9BVA1;P68371;P07437;Q13885;Q13509		2087.08	9.69846e+07	9.75022e+07	1.10581e+08	0	0.009444	High	2.51847	High	2.73002	High	1.88568	1
	YLTVAAIFR	3	2	2	Q13885;Q9BVA1		1053.61	1.57753e+07	1.44369e+07	1.37818e+07	0	8.156e-06	High	2.38924	High	2.19957	High	3.11208	0
	MSATFIGNSTAIQELFKR	4	3	3	Q13885;P68371;Q9BVA1		2014.05	2.34814e+06	134953415	1.56096e+08	0	0.0004104	High	2.27583	High	2.57503	High	1.73619	1
	KLAVNMVPFPRLHFFMPGFAPLTSR	2	5	5	Q13885;P68371;P07437;Q9BUF5;Q9BVA1		2873.56	3.42925e+07	0	4.07338e+07	0	4.724e-05	High	1.47133			High	2.51524	2
	LAVNMVPFPRLHFFMPGFAPLTSR	2	5	5	Q9BVA1;P68371;P07437;Q13885;Q9BUF5		2745.47	0	1.24686e+08	1.23554e+08	0	0.008462			High	2.77913	High	1.43091	1
	INVYYNEAAGNKYVPR	1	1	1	Q13885		1870.95	0	0	5.30221e+06	0	1.158e-07					High	4.52064	1
	KLAVNMVPFPR	3	6	6	Q13885;Q13509;P68371;P07437;Q9BUF5;Q9BVA1		1271.73	1.7086e+07	1.54591e+07	1.58661e+07	0.001	0.005107	High	2.2096	High	2.98568	High	3.09912	1
	MSMKEVDEQMLNVQNKNSSYFVEWIPNNVK	3	4	4	Q13885;P68371;P07437;Q9BVA1		3601.72	0	98211828	9.77334e+07	0.001	0.00871			High	2.83278	High	2.47328	2
	MSATFIGNSTAIQELFKR	2	3	3	Q9BVA1;P68371;Q13885	M1(Oxidation)	2030.04	0	4.46882e+07	4.98125e+07	0.001	0.03576			High	2.20701	High	1.91345	1
	TAVCDIPPRGLK	12	4	4	Q13885;P68371;P07437;Q9BVA1	C4(Carbamidomethyl)	1326.72	3.48914e+07	2.59292e+07	19998246	0.002	0.01255	High	2.65499	High	2.20008	High	2.49163	1
	ISEQFTAMFRR	1	5	5	Q9BVA1;P68371;P07437;Q13885;Q13509		1385.7	7.98945e+07	0	0	0.003	0.1011	High	1.04467					1
	YLTVAAIFRGR	2	2	2	Q9BVA1;Q13885		1266.73	3.5087e+07	0	3.52293e+07	0.003	0.08171	High	0.716283			High	0.736952	1
	FWEVISDEHGIDPTGSYHGDSDLQLER	1	2	2	Q13885;Q9BVA1		3102.41	0	9.72271e+06	0	0.004	0.0878			High	2.03364			0
	ALTVPELTQQMFDSKNMMAACDPRHGR	1	1	1	Q9BVA1	C21(Carbamidomethyl)	3104.46	0	3.79361e+07	0	0.005	0.1156			High	1.72821			2
	AILVDLEPGTMDSVRSGPFGQIFRPDNFVFGQSGAGNNWAK	1	2	2	Q9BVA1;P07437		4395.2	7.47216e+06	0	0	0.006	0.1258	High	2.18997					1
	ALTVPELTQQMFDSKNMMAACDPR	2	2	2	Q9BVA1;Q13885	C21(Carbamidomethyl)	2754.29	0	4.60456e+07	4.38508e+07	0.006	0.04885			High	2.02509	High	1.89284	1
Q9BVA1	Tubulin beta-2B chain OS=Homo sapiens OX=9606 GN=TUBB2B PE=1 SV=1 - [TBB2B_HUMAN]	69.21	1	2	31	209	6.9145e+08	6.84819e+08	7.11931e+08	207.728	62.47	26	75	197.203	68.54	27	65		0			445	49.9209	4.89404
	Sequence	# PSMs	# Proteins	# Protein Groups	Protein Group Accessions	Modifications	MH+ [Da]	A5: Area	B5: Area	C5: Area	q-Value	PEP	A2	XCorr A2	B2	XCorr B2	C2	XCorr C2	# Missed Cleavages
	SGPFGQIFRPDNFVFGQSGAGNNWAK	26	4	4	Q9BVA1;P68371;P07437;Q13885		2798.34	7.3224e+08	755639296	7.52502e+08	0	0.0002555	High	5.85823	High	6.30598	High	5.71143	0
	MREIVHIQAGQCGNQIGAK	18	5	5	P68371;Q9BVA1;P07437;Q13885;Q13509	C12(Carbamidomethyl)	2110.07	810786814	8.30833e+08	8.85272e+08	0	7.285e-05	High	5.16433	High	4.62978	High	4.60301	1
	MSMKEVDEQMLNVQNK	6	4	4	Q13885;P68371;P07437;Q9BVA1		1923.9	1.60833e+08	167910944	1.59259e+08	0	8.198e-12	High	5.0777	High	4.90456	High	5.56675	1
	INVYYNEATGNKYVPR	5	1	1	Q9BVA1		1900.96	3.68179e+08	3.55612e+08	0	0	0.0009613	High	4.40065	High	4.25825			1
	EVDEQMLNVQNK	6	4	4	Q9BVA1;P68371;P07437;Q13885		1446.69	1.78742e+07	1.78774e+07	1.90335e+07	0	0.008074	High	4.20749	High	4.49517	High	4.30774	0
	MREIVHIQAGQCGNQIGAK	8	5	5	Q9BVA1;P07437;P68371;Q13885;Q13509	M1(Oxidation); C12(Carbamidomethyl)	2126.07	1.74964e+07	1.1771e+08	1.11904e+08	0	0.02416	High	4.13328	High	3.42821	High	3.55187	1
	LHFFMPGFAPLTSR	13	5	5	Q9BVA1;P68371;P07437;Q13885;Q9BUF5		1620.84	363141550	3.68684e+08	4.64826e+08	0	0.0007652	High	3.91653	High	3.66173	High	3.55211	0
	NSSYFVEWIPNNVK	9	6	6	Q13885;Q13509;P68371;P07437;Q9BUF5;Q9BVA1		1696.84	149269886	133856675	1.71671e+08	0	1.69e-06	High	3.80886	High	3.09342	High	4.04907	0
	ISEQFTAMFR	6	5	5	Q9BVA1;P68371;P07437;Q13885;Q13509		1229.6	9.88469e+07	9.64544e+07	9.13089e+07	0	0.0009045	High	3.80856	High	4.08625	High	3.69389	0
	LAVNMVPFPR	5	6	6	Q9BVA1;P68371;P07437;Q13885;Q13509;Q9BUF5		1143.64	4.03627e+08	3.73777e+08	3.67514e+08	0	0.001102	High	3.71225	High	3.28382	High	3.33566	0
	AILVDLEPGTMDSVR	12	4	4	Q9BVA1;P07437;Q13885;Q13509		1615.84	5.31323e+08	4.67984e+08	4.98017e+08	0	0.0001504	High	3.5922	High	3.6058	High	3.45398	0
	MSMKEVDEQMLNVQNK	3	4	4	Q9BVA1;P68371;P07437;Q13885	M3(Oxidation)	1939.89	4.08536e+06	0	6.61951e+06	0	0.0252	High	3.569			High	3.45055	1
	ALTVPELTQQMFDSK	8	2	2	Q9BVA1;Q13885		1707.87	8.69916e+07	0	7.78459e+07	0	0.003394	High	3.48133	High	3.59247	High	3.32695	0
	EIVHIQAGQCGNQIGAK	3	5	5	P68371;Q13885;Q13509;P07437;Q9BVA1	C10(Carbamidomethyl)	1822.93	3.13482e+07	2.75969e+07	3.24523e+07	0	8.683e-10	High	3.45815	High	3.06115	High	4.44394	0
	IMNTFSVMPSPK	5	3	3	Q9BVA1;Q13885;Q9BUF5		1351.68	3.94354e+07	3.95705e+07	4.08522e+07	0	0.00503	High	3.22446	High	4.08924	High	4.00027	0
	NMMAACDPR	11	6	6	Q9BVA1;P68371;P07437;Q13885;Q13509;Q9BUF5	C6(Carbamidomethyl)	1065.43	8.55966e+07	7.74123e+07	8.28269e+07	0	0.006923	High	3.10808	High	3.01791	High	2.98447	0
	ESESCDCLQGFQLTHSLGGGTGSGMGTLLISK	4	2	2	Q9BVA1;Q13885	C5(Carbamidomethyl); C7(Carbamidomethyl)	3327.54	1.07139e+07	1.01177e+07	8.14496e+06	0	0.01158	High	3.03679	High	3.32834	High	3.16005	0
	AILVDLEPGTMDSVR	3	4	4	Q13885;Q13509;P07437;Q9BVA1	M11(Oxidation)	1631.83	73402759	6.48935e+07	6.29946e+07	0	8.346e-07	High	2.81846	High	3.50307	High	3.94768	0
	GHYTEGAELVDSVLDVVR	5	5	5	Q9BVA1;P68371;P07437;Q13885;Q13509		1958.99	6.09635e+07	5.70881e+07	5.64916e+07	0	0.01894	High	2.79431	High	3.32579	High	2.96409	0
	LAVNMVPFPR	2	6	6	Q9BVA1;P68371;P07437;Q13885;Q13509;Q9BUF5	M5(Oxidation)	1159.64	1.32394e+07	1.46039e+07	0	0	0.0155	High	2.70642	High	2.98918			0
	IREEYPDRIMNTFSVMPSPK	4	2	2	Q9BVA1;Q13885		2410.2	3.2402e+07	311606804	3.2494e+07	0	0.007968	High	2.67771	High	3.36239	High	1.838	2
	GHYTEGAELVDSVLDVVRK	8	5	5	Q9BVA1;P68371;P07437;Q13885;Q13509		2087.08	9.69846e+07	9.75022e+07	1.10581e+08	0	0.009444	High	2.51847	High	2.73002	High	1.88568	1
	YLTVAAIFR	3	2	2	Q13885;Q9BVA1		1053.61	1.57753e+07	1.44369e+07	1.37818e+07	0	8.156e-06	High	2.38924	High	2.19957	High	3.11208	0
	MSATFIGNSTAIQELFKR	4	3	3	Q13885;P68371;Q9BVA1		2014.05	2.34814e+06	134953415	1.56096e+08	0	0.0004104	High	2.27583	High	2.57503	High	1.73619	1
	KLAVNMVPFPRLHFFMPGFAPLTSR	2	5	5	Q13885;P68371;P07437;Q9BUF5;Q9BVA1		2873.56	3.42925e+07	0	4.07338e+07	0	4.724e-05	High	1.47133			High	2.51524	2
	LAVNMVPFPRLHFFMPGFAPLTSR	2	5	5	Q9BVA1;P68371;P07437;Q13885;Q9BUF5		2745.47	0	1.24686e+08	1.23554e+08	0	0.008462			High	2.77913	High	1.43091	1
	KLAVNMVPFPR	3	6	6	Q13885;Q13509;P68371;P07437;Q9BUF5;Q9BVA1		1271.73	1.7086e+07	1.54591e+07	1.58661e+07	0.001	0.005107	High	2.2096	High	2.98568	High	3.09912	1
	MSMKEVDEQMLNVQNKNSSYFVEWIPNNVK	3	4	4	Q13885;P68371;P07437;Q9BVA1		3601.72	0	98211828	9.77334e+07	0.001	0.00871			High	2.83278	High	2.47328	2
	MSATFIGNSTAIQELFKR	2	3	3	Q9BVA1;P68371;Q13885	M1(Oxidation)	2030.04	0	4.46882e+07	4.98125e+07	0.001	0.03576			High	2.20701	High	1.91345	1
	TAVCDIPPRGLK	12	4	4	Q13885;P68371;P07437;Q9BVA1	C4(Carbamidomethyl)	1326.72	3.48914e+07	2.59292e+07	19998246	0.002	0.01255	High	2.65499	High	2.20008	High	2.49163	1
	ISEQFTAMFRR	1	5	5	Q9BVA1;P68371;P07437;Q13885;Q13509		1385.7	7.98945e+07	0	0	0.003	0.1011	High	1.04467					1
	YLTVAAIFRGR	2	2	2	Q9BVA1;Q13885		1266.73	3.5087e+07	0	3.52293e+07	0.003	0.08171	High	0.716283			High	0.736952	1
	FWEVISDEHGIDPTGSYHGDSDLQLER	1	2	2	Q13885;Q9BVA1		3102.41	0	9.72271e+06	0	0.004	0.0878			High	2.03364			0
	ALTVPELTQQMFDSKNMMAACDPRHGR	1	1	1	Q9BVA1	C21(Carbamidomethyl)	3104.46	0	3.79361e+07	0	0.005	0.1156			High	1.72821			2
	AILVDLEPGTMDSVRSGPFGQIFRPDNFVFGQSGAGNNWAK	1	2	2	Q9BVA1;P07437		4395.2	7.47216e+06	0	0	0.006	0.1258	High	2.18997					1
	ALTVPELTQQMFDSKNMMAACDPR	2	2	2	Q9BVA1;Q13885	C21(Carbamidomethyl)	2754.29	0	4.60456e+07	4.38508e+07	0.006	0.04885			High	2.02509	High	1.89284	1
P68371	Tubulin beta-4B chain OS=Homo sapiens OX=9606 GN=TUBB4B PE=1 SV=1 - [TBB4B_HUMAN]	69.21	1	6	32	253	1.13314e+09	1.10225e+09	1.08282e+09	229.283	68.54	26	90	222.661	68.54	27	78	225.456	68.54	30	85	445	49.799	4.89404
	Sequence	# PSMs	# Proteins	# Protein Groups	Protein Group Accessions	Modifications	MH+ [Da]	A5: Area	B5: Area	C5: Area	q-Value	PEP	A2	XCorr A2	B2	XCorr B2	C2	XCorr C2	# Missed Cleavages
	SGPFGQIFRPDNFVFGQSGAGNNWAK	26	4	4	Q9BVA1;P68371;P07437;Q13885		2798.34	7.3224e+08	755639296	7.52502e+08	0	0.0002555	High	5.85823	High	6.30598	High	5.71143	0
	MREIVHLQAGQCGNQIGAK	18	5	5	P68371;Q9BVA1;P07437;Q13885;Q13509	C12(Carbamidomethyl)	2110.07	810786814	8.30833e+08	8.85272e+08	0	7.285e-05	High	5.16433	High	4.62978	High	4.60301	1
	MSMKEVDEQMLNVQNK	6	4	4	Q13885;P68371;P07437;Q9BVA1		1923.9	1.60833e+08	167910944	1.59259e+08	0	8.198e-12	High	5.0777	High	4.90456	High	5.56675	1
	INVYYNEATGGKYVPR	13	1	1	P68371		1843.94	1.2429e+09	1.23228e+09	1.18065e+09	0	0.0001153	High	5.00214	High	4.92052	High	4.94197	1
	FWEVISDEHGIDPTGTYHGDSDLQLER	7	1	1	P68371		3116.43	1.35494e+08	1.27743e+08	1.39781e+08	0	0.003532	High	4.94165	High	3.52874	High	4.56905	0
	EAESCDCLQGFQLTHSLGGGTGSGMGTLLISK	3	2	2	P68371;P07437	C5(Carbamidomethyl); C7(Carbamidomethyl)	3311.53	4.4756e+07	3.85062e+07	36573035	0	0.01271	High	4.21702	High	2.89018	High	3.89032	0
	EVDEQMLNVQNK	6	4	4	Q9BVA1;P68371;P07437;Q13885		1446.69	1.78742e+07	1.78774e+07	1.90335e+07	0	0.008074	High	4.20749	High	4.49517	High	4.30774	0
	MREIVHLQAGQCGNQIGAK	8	5	5	Q9BVA1;P07437;P68371;Q13885;Q13509	M1(Oxidation); C12(Carbamidomethyl)	2126.07	1.74964e+07	1.1771e+08	1.11904e+08	0	0.02416	High	4.13328	High	3.42821	High	3.55187	1
	LHFFMPGFAPLTSR	13	5	5	Q9BVA1;P68371;P07437;Q13885;Q9BUF5		1620.84	363141550	3.68684e+08	4.64826e+08	0	0.0007652	High	3.91653	High	3.66173	High	3.55211	0
	NSSYFVEWIPNNVK	9	6	6	Q13885;Q13509;P68371;P07437;Q9BUF5;Q9BVA1		1696.84	149269886	133856675	1.71671e+08	0	1.69e-06	High	3.80886	High	3.09342	High	4.04907	0
	ISEQFTAMFR	6	5	5	Q9BVA1;P68371;P07437;Q13885;Q13509		1229.6	9.88469e+07	9.64544e+07	9.13089e+07	0	0.0009045	High	3.80856	High	4.08625	High	3.69389	0
	LAVNMVPFPR	5	6	6	Q9BVA1;P68371;P07437;Q13885;Q13509;Q9BUF5		1143.64	4.03627e+08	3.73777e+08	3.67514e+08	0	0.001102	High	3.71225	High	3.28382	High	3.33566	0
	MSMKEVDEQMLNVQNK	3	4	4	Q9BVA1;P68371;P07437;Q13885	M3(Oxidation)	1939.89	4.08536e+06	0	6.61951e+06	0	0.0252	High	3.569			High	3.45055	1
	IMNTFSVVPSPK	6	3	3	Q13509;P68371;P07437		1319.71	142920947	1.4242e+08	1.4585e+08	0	3.945e-07	High	3.56472	High	3.66311	High	3.86539	0
	EIVHLQAGQCGNQIGAK	3	5	5	P68371;Q13885;Q13509;P07437;Q9BVA1	C10(Carbamidomethyl)	1822.93	3.13482e+07	2.75969e+07	3.24523e+07	0	8.683e-10	High	3.45815	High	3.06115	High	4.44394	0
	ALTVPELTQQMFDAK	18	2	2	Q13509;P68371		1691.87	3.8518e+08	3.12357e+08	3.48578e+08	0	1.648e-07	High	3.29248	High	3.01497	High	3.41328	0
	NMMAACDPR	11	6	6	Q9BVA1;P68371;P07437;Q13885;Q13509;Q9BUF5	C6(Carbamidomethyl)	1065.43	8.55966e+07	7.74123e+07	8.28269e+07	0	0.006923	High	3.10808	High	3.01791	High	2.98447	0
	AVLVDLEPGTMDSVR	5	1	1	P68371	M11(Oxidation)	1617.82	9.59606e+07	8.53497e+07	8.85966e+07	0	0.006803	High	3.10267	High	3.48862	High	2.59129	0
	IREEYPDRIMNTFSVVPSPK	10	2	2	P68371;P07437		2378.23	1140105721	1.14977e+09	1.10257e+09	0	0.0005301	High	2.903	High	2.47613	High	3.19791	2
	AVLVDLEPGTMDSVR	12	1	1	P68371		1601.82	1.01642e+09	924711238	9.65242e+08	0	0.001346	High	2.83829	High	3.56446	High	3.34771	0
	GHYTEGAELVDSVLDVVR	5	5	5	Q9BVA1;P68371;P07437;Q13885;Q13509		1958.99	6.09635e+07	5.70881e+07	5.64916e+07	0	0.01894	High	2.79431	High	3.32579	High	2.96409	0
	LAVNMVPFPR	2	6	6	Q9BVA1;P68371;P07437;Q13885;Q13509;Q9BUF5	M5(Oxidation)	1159.64	1.32394e+07	1.46039e+07	0	0	0.0155	High	2.70642	High	2.98918			0
	ALTVPELTQQMFDAK	4	2	2	Q13509;P68371	M11(Oxidation)	1707.87	15833190	6.03191e+06	1.29585e+07	0	0.001683	High	2.55253	High	3.44456	High	3.41896	0
	GHYTEGAELVDSVLDVVRK	8	5	5	Q9BVA1;P68371;P07437;Q13885;Q13509		2087.08	9.69846e+07	9.75022e+07	1.10581e+08	0	0.009444	High	2.51847	High	2.73002	High	1.88568	1
	ALTVPELTQQMFDAKNMMAACDPR	5	2	2	P68371;Q13509	C21(Carbamidomethyl)	2738.28	1.1212e+08	110047204	0	0	0.02627	High	2.29977	High	2.30295			1
	MSATFIGNSTAIQELFKR	4	3	3	Q13885;P68371;Q9BVA1		2014.05	2.34814e+06	134953415	1.56096e+08	0	0.0004104	High	2.27583	High	2.57503	High	1.73619	1
	IREEYPDRIMNTFSVVPSPK	2	2	2	P68371;P07437	M10(Oxidation)	2394.22	7.92363e+07	0	75609718	0	0.002423	High	2.01396			High	1.5593	2
	KLAVNMVPFPRLHFFMPGFAPLTSR	2	5	5	Q13885;P68371;P07437;Q9BUF5;Q9BVA1		2873.56	3.42925e+07	0	4.07338e+07	0	4.724e-05	High	1.47133			High	2.51524	2
	HGRYLTVAAVFR	2	2	2	P68371;P07437		1389.78	0	4.70707e+07	4.93108e+07	0	8.877e-07			High	3.11854	High	3.51262	1
	INVYYNEATGGK	2	1	1	P68371		1328.65	0	3.78499e+07	3.87286e+07	0	0.001915			High	3.0755	High	3.22208	0
	LAVNMVPFPRLHFFMPGFAPLTSR	2	5	5	Q9BVA1;P68371;P07437;Q13885;Q9BUF5		2745.47	0	1.24686e+08	1.23554e+08	0	0.008462			High	2.77913	High	1.43091	1
	KLAVNMVPFPR	3	6	6	Q13885;Q13509;P68371;P07437;Q9BUF5;Q9BVA1		1271.73	1.7086e+07	1.54591e+07	1.58661e+07	0.001	0.005107	High	2.2096	High	2.98568	High	3.09912	1
	MSMKEVDEQMLNVQNKNSSYFVEWIPNNVK	3	4	4	Q13885;P68371;P07437;Q9BVA1		3601.72	0	98211828	9.77334e+07	0.001	0.00871			High	2.83278	High	2.47328	2
	MSATFIGNSTAIQELFKR	2	3	3	Q9BVA1;P68371;Q13885	M1(Oxidation)	2030.04	0	4.46882e+07	4.98125e+07	0.001	0.03576			High	2.20701	High	1.91345	1
	TAVCDIPPRGLK	12	4	4	Q13885;P68371;P07437;Q9BVA1	C4(Carbamidomethyl)	1326.72	3.48914e+07	2.59292e+07	19998246	0.002	0.01255	High	2.65499	High	2.20008	High	2.49163	1
	INVYYNEATGGKYVPRAVLVDLEPGTMDSVR	1	1	1	P68371		3426.76	0	0	3.56696e+07	0.002	0.01267					High	2.04015	2
	ALTVPELTQQMFDAKNMMAACDPR	3	2	2	P68371;Q13509	M11(Oxidation); C21(Carbamidomethyl)	2754.28	4.85715e+07	4.60456e+07	2.0677e+07	0.003	0.06382	High	2.00767	High	3.14489	High	1.78745	1
	ISEQFTAMFRR	1	5	5	Q9BVA1;P68371;P07437;Q13885;Q13509		1385.7	7.98945e+07	0	0	0.003	0.1011	High	1.04467					1
	YLTVAAVFRGR	1	2	2	P68371;P07437		1252.72	1.28923e+08	0	0	0.004	0.1126	High	1.1271					1
	YVPRAVLVDLEPGTMDSVR	1	1	1	P68371		2117.11	0	0	6.56585e+06	0.009	0.06621					High	2.7672	1
Q9NRR3	CDC42 small effector protein 2 OS=Homo sapiens OX=9606 GN=CDC42SE2 PE=1 SV=1 - [C42S2_HUMAN]	69.05	1	2	2	2	4.57891e+06	2.51703e+06	0	6.92147	69.05	2	2		0				0			84	9.21734	8.35303
	Sequence	# PSMs	# Proteins	# Protein Groups	Protein Group Accessions	Modifications	MH+ [Da]	A5: Area	B5: Area	C5: Area	q-Value	PEP	A2	XCorr A2	B2	XCorr B2	C2	XCorr C2	# Missed Cleavages
	GGYGGGMPANVQMQLVDTKAG	1	1	1	Q9NRR3		2050.97	3.15497e+06	0	0	0	0.004038	High	4.04299					1
	SMIGEPTNFVHTAHVGSGDLFSGMNSVSSIQNQMQSK	1	1	1	Q9NRR3		3922.83	6.00284e+06	0	0	0.003	0.09448	High	2.87848					0
P58876	Histone H2B type 1-D OS=Homo sapiens OX=9606 GN=HIST1H2BD PE=1 SV=2 - [H2B1D_HUMAN]	68.25	6	3	13	143	3.43492e+09	3.41253e+09	3.44493e+09		0				0			121.193	68.25	12	51	126	13.9276	10.3159
	Sequence	# PSMs	# Proteins	# Protein Groups	Protein Group Accessions	Modifications	MH+ [Da]	A5: Area	B5: Area	C5: Area	q-Value	PEP	A2	XCorr A2	B2	XCorr B2	C2	XCorr C2	# Missed Cleavages
	AMGIMNSFVNDIFER	19	10	3	P23527;P58876;Q8N257		1743.82	4.98484e+08	5.53816e+08	5.26333e+08	0	8.511e-05	High	5.53676	High	4.75735	High	4.8806	0
	AMGIMNSFVNDIFER	20	10	3	P23527;P58876;Q8N257	M2(Oxidation)	1759.82	1.13833e+08	1.10365e+08	1.02721e+08	0	0.0001468	High	5.07849	High	4.73973	High	4.71792	0
	AMGIMNSFVNDIFER	4	10	3	P23527;P58876;Q8N257	M2(Oxidation); M5(Oxidation)	1775.81	51162378	40862619	6.00897e+07	0	0.004905	High	4.36855	High	4.00692	High	4.33419	0
	HAVSEGTKAVTKYTSSK	21	10	3	P23527;P58876;Q8N257		1793.94	2.54909e+09	2.63456e+09	2.57596e+09	0	0.00243	High	4.01566	High	3.64363	High	3.33303	2
	AMGIMNSFVNDIFERIAGEASR	6	9	2	P23527;P58876	M2(Oxidation)	2444.18	1.9576e+07	4.17045e+07	5.59859e+07	0	0.0004351	High	3.42871	High	2.10235	High	3.43219	1
	VLKQVHPDTGISSK	12	10	3	P23527;P58876;Q8N257		1508.85	3.77821e+08	3.64385e+08	3.79271e+08	0	6.926e-05	High	3.27662	High	3.17395	High	3.32519	1
	AMGIMNSFVNDIFERIAGEASR	6	9	2	P23527;P58876		2428.18	9.76939e+07	5.50036e+07	6.56178e+07	0	0.0006227	High	3.23303	High	2.83181	High	1.81901	1
	STITSREIQTAVR	13	9	2	P23527;P58876		1461.8	1.53994e+09	1.64501e+09	1.5435e+09	0	0.03102	High	3.04966	High	2.89202	High	3.23181	1
	EIQTAVRLLLPGELAK	11	9	2	P23527;P58876		1751.05	1.07399e+09	9.86635e+08	1.04951e+09	0	0.01705	High	2.77269	High	3.02699	High	2.75258	1
	STITSREIQTAVRLLLPGELAK	8	9	2	P23527;P58876		2396.4	6.53545e+08	7.15293e+08	6.56429e+08	0	7.584e-05	High	2.76303	High	1.63846	High	2.05809	2
	RSTITSREIQTAVR	2	9	2	P23527;P58876		1617.9	3.46118e+07	0	3.37762e+07	0	0.01973	High	2.69082			High	1.71061	2
	LLLPGELAK	12	10	3	P23527;P58876;Q8N257		953.606	6.21571e+09	5.95803e+09	6.21532e+09	0	0.01828	High	2.01586	High	2.3293	High	1.98876	0
	AMGIMNSFVNDIFERIAGEASR	2	9	2	P23527;P58876	M2(Oxidation); M5(Oxidation)	2460.18	0	27508434	2.61506e+07	0	0.01426			High	1.47079	High	1.26139	1
	KESYSVYVYKVLK	1	6	1	P58876		1605.89	0	0	1.64988e+07	0	0.0002569					High	2.30051	2
	LLLPGELAKHAVSEGTK	4	10	3	P23527;P58876;Q8N257		1763.01	0	1.20491e+08	1.29912e+08	0.001	0.02113			High	1.81921	High	1.78333	1
	HAVSEGTKAVTK	1	3	1	P23527		1227.67	0	0	0	0.002	0.05988	High	2.85624					1
	ESYSVYVYKVLK	1	6	1	P58876		1477.8	0	0	2.5305e+07	0.005	0.03781					High	1.9043	1
P60709	Actin, cytoplasmic 1 OS=Homo sapiens OX=9606 GN=ACTB PE=1 SV=1 - [ACTB_HUMAN]	68	2	13	29	362	3.17977e+09	3.05585e+09	3.16119e+09	306.066	64.8	26	118	293.927	62.4	26	124	315.971	60.8	24	120	375	41.7097	5.47803
	Sequence	# PSMs	# Proteins	# Protein Groups	Protein Group Accessions	Modifications	MH+ [Da]	A5: Area	B5: Area	C5: Area	q-Value	PEP	A2	XCorr A2	B2	XCorr B2	C2	XCorr C2	# Missed Cleavages
	LCYVALDFEQEMATAASSSSLEK	3	2	1	P60709	C2(Carbamidomethyl)	2550.19	4.36751e+07	0	0	0	9.869e-05	High	5.97197					0
	HQGVMVGMGQKDSYVGDEAQSK	19	6	2	P63267;P60709		2351.08	8.01714e+08	7.56358e+08	8.13545e+08	0	4.069e-05	High	5.80609	High	6.0756	High	5.37066	1
	CDVDIRKDLYANTVLSGGTTMYPGIADR	4	2	1	P60709	C1(Carbamidomethyl)	3101.51	1.54616e+07	1.00368e+07	12017157	0	4.66e-05	High	5.35961	High	4.88728	High	4.60595	2
	MQKEITALAPSTMK	10	6	2	P63267;P60709		1548.81	2.32679e+09	2.21371e+09	2.35295e+09	0	5.888e-05	High	4.58879	High	3.93817	High	4.14764	1
	CPEALFQPSFLGMESCGIHETTFNSIMK	5	2	1	P60709	C1(Carbamidomethyl); C16(Carbamidomethyl)	3231.48	1.94602e+07	2.27387e+07	1.55292e+07	0	0.003834	High	4.23727	High	2.87926	High	3.85774	0
	SYELPDGQVITIGNER	32	6	2	P63267;P60709		1790.9	1645384593	1309687414	1496601741	0	7.669e-09	High	4.12488	High	3.92191	High	4.33544	0
	HQGVMVGMGQKDSYVGDEAQSKR	16	6	2	P63267;P60709		2507.19	9.92079e+08	9.0403e+08	9.20542e+08	0	0.001918	High	4.04382	High	3.31833	High	3.8633	2
	FRCPEALFQPSFLGMESCGIHETTFNSIMK	1	2	1	P60709	C3(Carbamidomethyl); M15(Oxidation); C18(Carbamidomethyl)	3550.62	2.02555e+07	0	0	0	0.03355	High	3.70858					1
	DLYANTVLSGGTTMYPGIADR	6	2	1	P60709		2215.08	7.32495e+07	6.8221e+07	6.485e+07	0	0.0105	High	3.70344	High	4.28498	High	3.60715	0
	HQGVMVGMGQKDSYVGDEAQSKR	16	6	2	P63267;P60709	M8(Oxidation)	2523.18	9.87478e+07	9.4276e+07	1.0578e+08	0	0.00526	High	3.49947	High	3.4143	High	3.17217	2
	VAPEEHPVLLTEAPLNPK	12	2	1	P60709		1954.07	1701099699	1.57424e+09	1.58565e+09	0	0.004101	High	3.49357	High	4.12112	High	3.93235	0
	KDLYANTVLSGGTTMYPGIADR	3	2	1	P60709		2343.18	3.30024e+07	3.05483e+07	3.27596e+07	0	0.002246	High	3.40099	High	2.29912	High	4.20749	1
	TTGIVMDSGDGVTHTVPIYEGYALPHAILR	8	2	1	P60709		3183.63	1.40923e+08	1.48905e+08	1.65165e+08	0	0.003671	High	3.38658	High	3.42665	High	2.36069	0
	DSYVGDEAQSK	28	6	2	P63267;P60709		1198.53	57628346	5.10022e+07	0	0	5.256e-06	High	3.3712	High	3.49438	High	3.3426	0
	AGFAGDDAPR	33	6	2	P63267;P60709		976.45	785232799	6.50333e+08	6.52819e+08	0	0.002294	High	3.29727	High	3.22923	High	2.96359	0
	HQGVMVGMGQK	30	6	2	P63267;P60709		1171.57	117668900	102987742	1.50724e+08	0	0.00703	High	3.27709	High	3.23157	High	3.14064	0
	HQGVMVGMGQKDSYVGDEAQSK	9	6	2	P63267;P60709	M5(Oxidation)	2367.08	7.84089e+07	8.49985e+07	9.31798e+07	0	0.001207	High	3.2511	High	2.80807	High	3.87904	1
	DLYANTVLSGGTTMYPGIADR	3	2	1	P60709	M14(Oxidation)	2231.07	5.93104e+06	8.04966e+06	1.03342e+07	0	9.38e-05	High	3.19597	High	3.09472	High	3.69979	0
	MQKEITALAPSTMK	11	6	2	P63267;P60709	M1(Oxidation)	1564.81	94966156	9.80907e+07	1.23506e+08	0	0.002213	High	3.18367	High	3.76519	High	3.43425	1
	MQKEITALAPSTMKIK	9	6	2	P63267;P60709		1790	7.55297e+08	7.36069e+08	7.65026e+08	0	1.827e-08	High	3.10743	High	3.71703	High	3.94871	2
	DSYVGDEAQSKR	32	6	2	P63267;P60709		1354.63	105237463	93568330	1.19802e+08	0	0.0002546	High	3.01218	High	2.76597	High	2.84448	1
	AGFAGDDAPRAVFPSIVGRPR	10	6	2	P63267;P60709		2156.14	3.10636e+09	2.95141e+09	3.09456e+09	0	0.0156	High	2.77562	High	3.67556	High	3.1521	1
	HQGVMVGMGQKDSYVGDEAQSK	7	6	2	P63267;P60709	M5(Oxidation); M8(Oxidation)	2383.07	998062	2.43773e+07	2.67826e+07	0	4.642e-05	High	2.70709	High	2.08917	High	2.84621	1
	EITALAPSTMK	8	6	2	P63267;P60709		1161.62	5.13428e+08	4.99314e+08	4.79266e+08	0	9.1e-06	High	2.68858	High	2.60362	High	2.97476	0
	EKLCYVALDFEQEMATAASSSSLEK	3	2	1	P60709	C4(Carbamidomethyl)	2807.32	4.3036e+06	6.489e+06	6.71864e+06	0	6.563e-05	High	2.53339	High	3.4907	High	3.93305	1
	FRCPEALFQPSFLGMESCGIHETTFNSIMK	6	2	1	P60709	C3(Carbamidomethyl); C18(Carbamidomethyl)	3534.65	2.09609e+08	2.85304e+08	2.97828e+08	0	0.001832	High	1.97928	High	2.20588	High	3.1123	1
	AVFPSIVGRPR	10	6	2	P63267;P60709		1198.71	4.10615e+09	4.00242e+09	4.03606e+09	0	0.01049	High	1.75931	High	2.26047	High	1.42855	0
	MQKEITALAPSTMKIK	3	6	2	P63267;P60709	M13(Oxidation)	1805.99	9.55404e+07	96772049	85114737	0	0.001069	High	1.56047	High	2.15779	High	1.86305	2
	GYSFTTTAER	1	2	1	P60709		1132.53	0	0	19834006	0	0.0005979					High	3.01077	0
	EITALAPSTMK	3	6	2	P63267;P60709	M10(Oxidation)	1177.62	21014197	2.62438e+07	2.25657e+07	0.001	0.05132	High	2.73483	High	2.43348	High	2.63606	0
	VAPEEHPVLLTEAPLNPKANR	4	2	1	P60709		2295.25	37263298	2.90724e+07	3.07564e+07	0.001	0.006771	High	2.53114	High	1.86939	High	2.75335	1
	IKIIAPPERK	4	6	2	P63267;P60709		1164.75	7.50686e+07	6.44237e+07	6.37599e+07	0.001	0.0107	High	2.33348	High	1.93851	High	2.58438	2
	LDLAGRDLTDYLMK	2	6	2	P63267;P60709		1623.84	4.71596e+07	4.50154e+07	0	0.001	0.04793	High	1.91482	High	2.12836			1
	EITALAPSTMKIK	2	6	2	P63267;P60709		1402.8	0	3.43297e+07	3.53473e+07	0.002	0.05609			High	3.45553	High	3.12489	1
	IWHHTFYNELRVAPEEHPVLLTEAPLNPK	1	2	1	P60709		3450.8	4.2602e+07	0	0	0.003	0.1012	High	1.69922					1
	HQGVMVGMGQK	3	6	2	P63267;P60709	M5(Oxidation)	1187.57	9.20188e+06	0	0	0.004	0.07768	High	2.19073	High	2.96969	High	3.05033	0
	VAPEEHPVLLTEAPLNPKANREK	2	2	1	P60709		2552.39	0	1.56934e+08	0	0.004	0.06874			High	1.63586			2
	HQGVMVGMGQKDSYVGDEAQSKR	1	6	2	P63267;P60709	M5(Oxidation); M8(Oxidation)	2539.18	0	0	2.42486e+07	0.005	0.03993					High	2.22428	2
	SYELPDGQVITIGNERFR	2	6	2	P63267;P60709		2094.07	321886080	296444042	0	0.008	0.1489	High	0.765846	High	1.668			1
P08670	Vimentin OS=Homo sapiens OX=9606 GN=VIM PE=1 SV=4 - [VIME_HUMAN]	67.38	1	34	34	132	4.68968e+08	4.6789e+08	469597097	80.9519	61.8	29	46	91.0365	67.17	28	47	79.5385	66.52	25	39	466	53.6191	5.12256
	Sequence	# PSMs	# Proteins	# Protein Groups	Protein Group Accessions	Modifications	MH+ [Da]	A5: Area	B5: Area	C5: Area	q-Value	PEP	A2	XCorr A2	B2	XCorr B2	C2	XCorr C2	# Missed Cleavages
	TVETRDGQVINETSQHHDDLE	10	1	1	P08670		2423.11	4.95538e+07	4.22618e+07	4.37106e+07	0	7.721e-09	High	4.35425	High	4.40462	High	4.56401	1
	FLEQQNKILLAELEQLKGQGK	9	1	1	P08670		2427.37	2.36501e+08	228176205	2.59782e+08	0	1.132e-07	High	3.73511	High	3.93161	High	4.63861	2
	TNEKVELQELNDR	4	1	1	P08670		1587.8	2.89974e+07	29870080	2.91735e+07	0	0.0144	High	3.58973	High	2.28198	High	2.93151	1
	NLQEAEEWYK	6	1	1	P08670		1309.61	5.74226e+07	54740311	5.62166e+07	0	0.01748	High	3.47146	High	3.14417	High	3.27819	0
	NLQEAEEWYKSK	7	1	1	P08670		1524.74	6.67863e+07	2.53489e+08	5.29281e+07	0	0.006577	High	3.45012	High	3.62889	High	3.415	1
	SLYASSPGGVYATR	6	1	1	P08670		1428.71	5.24301e+08	5.00498e+08	4.92042e+08	0	0.0002946	High	3.4255	High	4.13241	High	3.77251	0
	KVESLQEEIAFLKK	7	1	1	P08670		1661.95	7.72078e+07	6.74287e+07	6.1558e+07	0	5.608e-06	High	3.03558	High	3.05222	High	3.15934	2
	DGQVINETSQHHDDLE	8	1	1	P08670		1836.8	83425608	89760744	9.63839e+06	0	0.002004	High	2.83055	High	2.96617	High	3.25624	0
	EEAENTLQSFRQDVDNASLAR	3	1	1	P08670		2393.13	5.21702e+06	5.80444e+06	0	0	0.02916	High	2.63986	High	2.45035			1
	QQYESVAAKNLQEAEEWYK	1	1	1	P08670		2314.1	1.23609e+07	0	0	0	0.01424	High	2.55335					1
	LQEEMLQREEAENTLQSFRQDVDNASLAR	3	1	1	P08670		3420.65	4.07096e+07	47836789	5.58646e+07	0	0.0009943	High	2.48633	High	2.65689	High	2.78563	2
	FADLSEAANRNNDALRQAK	6	1	1	P08670		2104.06	2.20548e+08	1.94221e+08	208451331	0	0.0006484	High	2.45236	High	2.63179	High	2.65682	2
	FADLSEAANRNNDALR	3	1	1	P08670		1776.87	241901319	2.42872e+08	2.47793e+08	0	0.0007411	High	2.25609	High	2.67818	High	2.05711	1
	LGDLYEEEMRELR	3	1	1	P08670		1652.8	8.38607e+07	0	8.25776e+07	0	6.673e-06	High	2.02001			High	2.59758	1
	ISLPLPNFSSLNLRETNLDSLPLVDTHSKR	3	1	1	P08670		3376.83	8.33026e+07	1.0378e+08	9.36285e+07	0	0.02003	High	1.98088	High	2.21855	High	1.52944	2
	QVQSLTCEVDALKGTNESLER	6	1	1	P08670	C7(Carbamidomethyl)	2377.18	1.96704e+08	1.93893e+08	185799693	0	4.558e-06	High	1.85474	High	2.38883	High	2.22991	1
	TYSLGSALRPSTSR	5	1	1	P08670		1495.79	5.96088e+08	6.03464e+08	6.0453e+08	0	9.189e-05	High	1.62745	High	1.41098	High	1.80034	0
	LGDLYEEEMRELRR	5	1	1	P08670		1808.9	1.75557e+08	1.68538e+08	1.73573e+08	0	0.008591	High	1.36608	High	1.7261	High	0.734281	2
	LLQDSVDFSLADAINTEFKNTR	5	1	1	P08670		2497.27	1.3703e+08	1.44623e+08	1.34192e+08	0	6.54e-07	High	0.956623	High	1.28939	High	1.50477	1
	VEVERDNLAEDIMR	3	1	1	P08670		1688.83	0	7.09578e+07	7.46363e+07	0	0.0009651			High	3.09885	High	3.19825	1
	TLLIKTVETRDGQVINETSQHHDDLE	2	1	1	P08670		2991.51	0	6.39392e+07	6.74206e+07	0	6.459e-06			High	2.89081	High	3.09782	2
	HLREYQDLLNVK	2	1	1	P08670		1527.83	0	6.89418e+07	7.04714e+07	0	0.0106			High	2.5807	High	2.54776	1
	LGDLYEEEMR	1	1	1	P08670		1254.57	0	0	13489681	0	0.000124					High	3.09496	0
	QQYESVAAKNLQEAEEWYKSK	2	1	1	P08670		2529.24	1.14058e+08	1.06159e+08	0	0.001	0.03197	High	2.39496	High	1.89932			2
	SYVTTSTRTYSLGSALRPSTSR	3	1	1	P08670		2391.23	5.58802e+07	5.83491e+07	6.44703e+07	0.001	0.006297	High	2.26798	High	1.62077	High	1.6987	1
	QVQSLTCEVDALKGTNESLERQMR	2	1	1	P08670	C7(Carbamidomethyl)	2792.38	62930183	6.77952e+07	0	0.001	0.02421	High	1.64522	High	2.54864			2
	ILLAELEQLKGQGK	3	1	1	P08670		1539.91	6.1298e+07	6.18196e+07	6.0393e+07	0.001	0.007613	High	1.15296	High	1.21885	High	1.42787	1
	ETNLDSLPLVDTHSK	1	1	1	P08670		1668.84	1.8609e+06	0	0	0.002	0.07005	High	3.88848					0
	DVRQQYESVAAK	4	1	1	P08670		1393.71	9.93654e+06	9.91953e+06	8.95225e+06	0.002	0.07067	High	2.88763	High	3.10109	High	2.4417	1
	ETNLDSLPLVDTHSKR	3	1	1	P08670		1824.95	84237833	8.31321e+07	0	0.003	0.08437	High	2.34515	High	1.38475			1
	TLLIKTVETR	1	1	1	P08670		1173.72	1.39368e+07	0	0	0.004	0.1095	High	2.43022					1
	MFGGPGTASRPSSSR	3	1	1	P08670		1494.72	2.86517e+08	2.99708e+08	3.1222e+08	0.004	0.03035	High	1.29645	High	0.86714	High	1.38024	0
	RMFGGPGTASRPSSSR	1	1	1	P08670		1650.81	3.28349e+07	0	0	0.005	0.1222	High	2.77234					1
	SKFADLSEAANRNNDALR	1	1	1	P08670		1991.99	0	1.14417e+07	0	0.009	0.157			High	2.39936			2
Q9BW30	Tubulin polymerization-promoting protein family member 3 OS=Homo sapiens OX=9606 GN=TPPP3 PE=1 SV=1 - [TPPP3_HUMAN]	67.05	1	9	9	27	1.15649e+08	1.17447e+08	1.25999e+08	24.2635	45.45	6	9	19.5703	46.59	5	8	21.3624	55.11	7	10	176	18.9736	9.12939
	Sequence	# PSMs	# Proteins	# Protein Groups	Protein Group Accessions	Modifications	MH+ [Da]	A5: Area	B5: Area	C5: Area	q-Value	PEP	A2	XCorr A2	B2	XCorr B2	C2	XCorr C2	# Missed Cleavages
	SKEEAFDAICQLVAGKEPANVGVTK	12	1	1	Q9BW30	C10(Carbamidomethyl)	2661.37	2.31275e+08	2.36097e+08	2.82685e+08	0	8.34e-10	High	3.84793	High	3.73564	High	5.07966	2
	SVTGTDVDIVFSKVK	2	1	1	Q9BW30		1594.87	3.40259e+06	0	1.87772e+06	0	0.004017	High	3.80603			High	2.79731	1
	SVTGTDVDIVFSK	3	1	1	Q9BW30		1367.71	2.57209e+07	24056744	24439435	0	0.01201	High	2.78408	High	3.12082	High	2.80043	0
	GIAGRQDILDDSGYVSAYK	3	1	1	Q9BW30		2028.01	8.97991e+06	8.40693e+06	12464483	0	3.092e-09	High	2.67702	High	3.2096	High	4.90219	1
	VINYEEFKK	1	1	1	Q9BW30		1169.62	0	0	4.69185e+07	0	0.001578					High	1.03098	1
	GIAGRQDILDDSGYVSAYKNAGTYDAK	2	1	1	Q9BW30		2848.38	64558733	6.44748e+07	0	0.001	0.04506	High	2.72486	High	1.85005			2
	VINYEEFKKALEELATK	2	1	1	Q9BW30		2025.1	0	5.17687e+07	4.83929e+07	0.002	0.01688			High	1.06539	High	1.39935	2
	TGGAVDRLTDTSR	1	1	1	Q9BW30		1348.68	51112488	0	0	0.003	0.08676	High	2.19683					1
	FAIHGDPKASGQEMNGKNWAK	1	1	1	Q9BW30		2286.11	0	0	4.33302e+07	0.003	0.02251					High	2.37713	2
P04083	Annexin A1 OS=Homo sapiens OX=9606 GN=ANXA1 PE=1 SV=2 - [ANXA1_HUMAN]	65.9	1	28	28	112	3.9307e+08	2.31801e+08	392894452	91.19	60.4	23	37	98.5611	60.4	24	39	85.9696	53.76	22	36	346	38.69	7.02002
	Sequence	# PSMs	# Proteins	# Protein Groups	Protein Group Accessions	Modifications	MH+ [Da]	A5: Area	B5: Area	C5: Area	q-Value	PEP	A2	XCorr A2	B2	XCorr B2	C2	XCorr C2	# Missed Cleavages
	SEDFGVNEDLADSDAR	6	1	1	P04083		1739.74	5.55334e+07	5.21319e+07	51641337	0	9.829e-12	High	5.13629	High	5.07677	High	5.88423	0
	SSKGGPGSAVSPYPTFNPSSDVAALHK	8	1	1	P04083		2658.32	5.62235e+08	14574206	5.48165e+08	0	2.275e-11	High	5.09344	High	4.53025	High	5.5645	1
	GLGTDEDTLIEILASR	8	1	1	P04083		1702.89	5.07895e+07	39834674	2.64321e+07	0	0.0003934	High	4.95666	High	4.41659	High	3.99737	0
	GGPGSAVSPYPTFNPSSDVAALHK	7	1	1	P04083		2356.16	4.03395e+08	3.89419e+08	3.78783e+08	0	0.0005672	High	3.78976	High	2.64008	High	3.30666	0
	GDRSEDFGVNEDLADSDAR	6	1	1	P04083		2067.89	93096619	89343421	94295603	0	0.0002564	High	3.76354	High	5.03738	High	3.64541	1
	GTDVNVFNTILTTR	6	1	1	P04083		1550.82	1.87021e+08	1.59015e+08	1.89469e+08	0	6.531e-08	High	3.6591	High	4.39121	High	4.63903	0
	QAWFIENEEQEYVQTVK	2	1	1	P04083		2141.03	1.10495e+07	6.52817e+06	0	0	0.0004506	High	3.55392	High	5.19393			0
	AAYLQETGKPLDETLKK	4	1	1	P04083		1905.04	4.92478e+07	4.59924e+07	4.59568e+07	0	0.02805	High	3.50863	High	1.67145	High	1.76766	1
	DLAKDITSDTSGDFR	3	1	1	P04083		1640.78	3.2123e+07	2.44466e+07	2.64146e+07	0	0.004951	High	3.5016	High	3.73636	High	3.67245	1
	KGTDVNVFNTILTTR	6	1	1	P04083		1678.92	1.60182e+08	1.46968e+08	1.46857e+08	0	0.001238	High	3.26772	High	4.19741	High	3.92647	1
	DITSDTSGDFR	3	1	1	P04083		1213.54	3.74389e+07	3.59846e+07	3.61273e+07	0	0.0001971	High	3.26424	High	2.87934	High	3.04966	0
	GVDEATIIDILTKR	9	1	1	P04083		1543.88	1.03844e+08	105847524	9.39745e+07	0	0.003208	High	2.9078	High	3.83646	High	2.28832	1
	ILVALCGGN	3	1	1	P04083	C6(Carbamidomethyl)	916.491	3.23782e+07	2.72255e+07	2.79749e+07	0	0.01639	High	2.81087	High	2.4876	High	2.95809	0
	AAMKGLGTDEDTLIEILASR	3	1	1	P04083		2104.1	19333093	1.97819e+07	1.95003e+07	0	0.000801	High	2.77578	High	2.54436	High	3.03843	1
	RKGTDVNVFNTILTTR	3	1	1	P04083		1835.02	0	0	1.83968e+08	0	0.001316	High	2.70845	High	2.81168	High	1.49997	2
	DLAKDITSDTSGDFRNALLSLAK	6	1	1	P04083		2451.27	3.51682e+07	5.28903e+07	5.64991e+07	0	0.01889	High	2.6694	High	2.43317	High	2.26737	2
	NALLSLAKGDRSEDFGVNEDLADSDAR	6	1	1	P04083		2878.39	1.11957e+08	1.18739e+08	107145011	0	0.01144	High	2.21159	High	3.23002	High	3.26247	2
	GGPGSAVSPYPTFNPSSDVAALHKAIMVK	3	1	1	P04083		2898.49	2.13581e+08	0	2.51736e+08	0	0.02584	High	2.10003			High	2.00417	1
	GVDEATIIDILTK	2	1	1	P04083		1387.77	0	2.20858e+07	2.01327e+07	0	0.00211			High	3.80289	High	3.47919	0
	GDRSEDFGVNEDLADSDARALYEAGER	2	1	1	P04083		2957.33	0	3.48878e+07	3.39615e+07	0	4.104e-05			High	1.7349	High	3.05024	2
	CATSKPAFFAEK	5	1	1	P04083	C1(Carbamidomethyl)	1356.67	8.77064e+07	9.00622e+07	8.88321e+07	0.001	0.002671	High	1.9335	High	2.92208	High	2.7831	0
	GVDEATIIDILTKRNNAQR	4	1	1	P04083		2127.16	1.48003e+08	1.32027e+08	1.48932e+08	0.001	0.04143	High	1.74877	High	1.4598	High	1.02654	2
	AIMVKGVDEATIIDILTKR	1	1	1	P04083		2086.2	0	1.27052e+07	0	0.001	0.04812			High	1.35487			2
	CATSKPAFFAEKLHQAMKGVGTR	2	1	1	P04083	C1(Carbamidomethyl)	2535.3	2.4404e+07	0	2.70048e+07	0.002	0.01699	High	2.13394			High	2.05077	2
	DITSDTSGDFRNALLSLAK	1	1	1	P04083		2024.04	3.48891e+07	0	0	0.002	0.06392	High	1.90244					1
	SEIDMNDIKAFYQK	1	1	1	P04083		1701.81	0	0	0	0.003	0.1046	High	3.20393					1
	TPAQFDADELRAAMK	1	1	1	P04083		1663.81	0	1.52239e+07	0	0.008	0.1436			High	1.91787			1
	CATSKPAFFAEKLHQAMK	1	1	1	P04083	C1(Carbamidomethyl)	2065.04	0	1.5228e+07	0	0.008	0.1475			High	1.83857			1
P07437	Tubulin beta chain OS=Homo sapiens OX=9606 GN=TUBB PE=1 SV=2 - [TBB5_HUMAN]	65.32	1	3	28	212	8.94377e+08	9.1208e+08	9.13447e+08	205.184	64.64	25	80	194.946	61.04	23	62	191.904	64.64	25	70	444	49.639	4.89404
	Sequence	# PSMs	# Proteins	# Protein Groups	Protein Group Accessions	Modifications	MH+ [Da]	A5: Area	B5: Area	C5: Area	q-Value	PEP	A2	XCorr A2	B2	XCorr B2	C2	XCorr C2	# Missed Cleavages
	SGPFGQIFRPDNFVFGQSGAGNNWAK	26	4	4	Q9BVA1;P68371;P07437;Q13885		2798.34	7.3224e+08	755639296	7.52502e+08	0	0.0002555	High	5.85823	High	6.30598	High	5.71143	0
	MREIVHIQAGQCGNQIGAK	18	5	5	P68371;Q9BVA1;P07437;Q13885;Q13509	C12(Carbamidomethyl)	2110.07	810786814	8.30833e+08	8.85272e+08	0	7.285e-05	High	5.16433	High	4.62978	High	4.60301	1
	MSMKEVDEQMLNVQNK	6	4	4	Q13885;P68371;P07437;Q9BVA1		1923.9	1.60833e+08	167910944	1.59259e+08	0	8.198e-12	High	5.0777	High	4.90456	High	5.56675	1
	EAESCDCLQGFQLTHSLGGGTGSGMGTLLISK	3	2	2	P68371;P07437	C5(Carbamidomethyl); C7(Carbamidomethyl)	3311.53	4.4756e+07	3.85062e+07	36573035	0	0.01271	High	4.21702	High	2.89018	High	3.89032	0
	EVDEQMLNVQNK	6	4	4	Q9BVA1;P68371;P07437;Q13885		1446.69	1.78742e+07	1.78774e+07	1.90335e+07	0	0.008074	High	4.20749	High	4.49517	High	4.30774	0
	MREIVHIQAGQCGNQIGAK	8	5	5	Q9BVA1;P07437;P68371;Q13885;Q13509	M1(Oxidation); C12(Carbamidomethyl)	2126.07	1.74964e+07	1.1771e+08	1.11904e+08	0	0.02416	High	4.13328	High	3.42821	High	3.55187	1
	LHFFMPGFAPLTSR	13	5	5	Q9BVA1;P68371;P07437;Q13885;Q9BUF5		1620.84	363141550	3.68684e+08	4.64826e+08	0	0.0007652	High	3.91653	High	3.66173	High	3.55211	0
	NSSYFVEWIPNNVK	9	6	6	Q13885;Q13509;P68371;P07437;Q9BUF5;Q9BVA1		1696.84	149269886	133856675	1.71671e+08	0	1.69e-06	High	3.80886	High	3.09342	High	4.04907	0
	ISEQFTAMFR	6	5	5	Q9BVA1;P68371;P07437;Q13885;Q13509		1229.6	9.88469e+07	9.64544e+07	9.13089e+07	0	0.0009045	High	3.80856	High	4.08625	High	3.69389	0
	LAVNMVPFPR	5	6	6	Q9BVA1;P68371;P07437;Q13885;Q13509;Q9BUF5		1143.64	4.03627e+08	3.73777e+08	3.67514e+08	0	0.001102	High	3.71225	High	3.28382	High	3.33566	0
	AILVDLEPGTMDSVR	12	4	4	Q9BVA1;P07437;Q13885;Q13509		1615.84	5.31323e+08	4.67984e+08	4.98017e+08	0	0.0001504	High	3.5922	High	3.6058	High	3.45398	0
	MSMKEVDEQMLNVQNK	3	4	4	Q9BVA1;P68371;P07437;Q13885	M3(Oxidation)	1939.89	4.08536e+06	0	6.61951e+06	0	0.0252	High	3.569			High	3.45055	1
	ALTVPELTQQVFDAK	13	1	1	P07437		1659.9	4.51269e+07	7.47361e+07	84288778	0	0.01935	High	3.56843	High	3.7355	High	3.26414	0
	IMNTFSVVPSPK	6	3	3	Q13509;P68371;P07437		1319.71	142920947	1.4242e+08	1.4585e+08	0	3.945e-07	High	3.56472	High	3.66311	High	3.86539	0
	EIVHIQAGQCGNQIGAK	3	5	5	P68371;Q13885;Q13509;P07437;Q9BVA1	C10(Carbamidomethyl)	1822.93	3.13482e+07	2.75969e+07	3.24523e+07	0	8.683e-10	High	3.45815	High	3.06115	High	4.44394	0
	NMMAACDPR	11	6	6	Q9BVA1;P68371;P07437;Q13885;Q13509;Q9BUF5	C6(Carbamidomethyl)	1065.43	8.55966e+07	7.74123e+07	8.28269e+07	0	0.006923	High	3.10808	High	3.01791	High	2.98447	0
	IREEYPDRIMNTFSVVPSPK	10	2	2	P68371;P07437		2378.23	1140105721	1.14977e+09	1.10257e+09	0	0.0005301	High	2.903	High	2.47613	High	3.19791	2
	AILVDLEPGTMDSVR	3	4	4	Q13885;Q13509;P07437;Q9BVA1	M11(Oxidation)	1631.83	73402759	6.48935e+07	6.29946e+07	0	8.346e-07	High	2.81846	High	3.50307	High	3.94768	0
	GHYTEGAELVDSVLDVVR	5	5	5	Q9BVA1;P68371;P07437;Q13885;Q13509		1958.99	6.09635e+07	5.70881e+07	5.64916e+07	0	0.01894	High	2.79431	High	3.32579	High	2.96409	0
	LAVNMVPFPR	2	6	6	Q9BVA1;P68371;P07437;Q13885;Q13509;Q9BUF5	M5(Oxidation)	1159.64	1.32394e+07	1.46039e+07	0	0	0.0155	High	2.70642	High	2.98918			0
	GHYTEGAELVDSVLDVVRK	8	5	5	Q9BVA1;P68371;P07437;Q13885;Q13509		2087.08	9.69846e+07	9.75022e+07	1.10581e+08	0	0.009444	High	2.51847	High	2.73002	High	1.88568	1
	IREEYPDRIMNTFSVVPSPK	2	2	2	P68371;P07437	M10(Oxidation)	2394.22	7.92363e+07	0	75609718	0	0.002423	High	2.01396			High	1.5593	2
	ISVYYNEATGGKYVPR	2	1	1	P07437		1816.93	1.05446e+08	0	9.7704e+07	0	6.531e-05	High	1.9329			High	1.87285	1
	FWEVISDEHGIDPTGTYHGDSDLQLDR	5	1	1	P07437		3102.42	5.25715e+07	55300547	57139215	0	0.006165	High	1.80254	High	2.80721	High	2.0933	0
	KLAVNMVPFPRLHFFMPGFAPLTSR	2	5	5	Q13885;P68371;P07437;Q9BUF5;Q9BVA1		2873.56	3.42925e+07	0	4.07338e+07	0	4.724e-05	High	1.47133			High	2.51524	2
	HGRYLTVAAVFR	2	2	2	P68371;P07437		1389.78	0	4.70707e+07	4.93108e+07	0	8.877e-07			High	3.11854	High	3.51262	1
	LAVNMVPFPRLHFFMPGFAPLTSR	2	5	5	Q9BVA1;P68371;P07437;Q13885;Q9BUF5		2745.47	0	1.24686e+08	1.23554e+08	0	0.008462			High	2.77913	High	1.43091	1
	KLAVNMVPFPR	3	6	6	Q13885;Q13509;P68371;P07437;Q9BUF5;Q9BVA1		1271.73	1.7086e+07	1.54591e+07	1.58661e+07	0.001	0.005107	High	2.2096	High	2.98568	High	3.09912	1
	MSMKEVDEQMLNVQNKNSSYFVEWIPNNVK	3	4	4	Q13885;P68371;P07437;Q9BVA1		3601.72	0	98211828	9.77334e+07	0.001	0.00871			High	2.83278	High	2.47328	2
	TAVCDIPPRGLK	12	4	4	Q13885;P68371;P07437;Q9BVA1	C4(Carbamidomethyl)	1326.72	3.48914e+07	2.59292e+07	19998246	0.002	0.01255	High	2.65499	High	2.20008	High	2.49163	1
	ISEQFTAMFRR	1	5	5	Q9BVA1;P68371;P07437;Q13885;Q13509		1385.7	7.98945e+07	0	0	0.003	0.1011	High	1.04467					1
	YLTVAAVFRGR	1	2	2	P68371;P07437		1252.72	1.28923e+08	0	0	0.004	0.1126	High	1.1271					1
	AILVDLEPGTMDSVRSGPFGQIFRPDNFVFGQSGAGNNWAK	1	2	2	Q9BVA1;P07437		4395.2	7.47216e+06	0	0	0.006	0.1258	High	2.18997					1
P60660	Myosin light polypeptide 6 OS=Homo sapiens OX=9606 GN=MYL6 PE=1 SV=2 - [MYL6_HUMAN]	64.24	1	12	12	53	2.21157e+08	2.04382e+08	2.19205e+08	43.8633	58.94	8	18	54.7372	50.99	9	19	48.5697	64.24	9	16	151	16.9191	4.65283
	Sequence	# PSMs	# Proteins	# Protein Groups	Protein Group Accessions	Modifications	MH+ [Da]	A5: Area	B5: Area	C5: Area	q-Value	PEP	A2	XCorr A2	B2	XCorr B2	C2	XCorr C2	# Missed Cleavages
	TGDGKILYSQCGDVMR	6	1	1	P60660	C11(Carbamidomethyl)	1799.85	8.55232e+07	8.59547e+07	9.11757e+07	0	2.643e-10	High	3.81811	High	4.01081	High	4.95799	1
	NKDQGTYEDYVEGLR	6	1	1	P60660		1786.83	93126540	8.11907e+07	8.86122e+07	0	2.277e-12	High	3.70072	High	4.69503	High	4.69663	1
	VLDFEHFLPMLQTVAK	11	1	1	P60660		1888.02	2.6551e+08	2.56465e+08	2.50443e+08	0	0.01576	High	3.66296	High	4.47231	High	3.36491	0
	ALGQNPTNAEVLK	9	1	1	P60660		1354.74	2.57663e+08	2.62748e+08	2.67854e+08	0	1.919e-05	High	3.3508	High	3.37668	High	3.68822	0
	ILYSQCGDVMR	6	1	1	P60660	C6(Carbamidomethyl)	1341.63	1.03582e+08	9.39329e+07	9.77417e+07	0	2.559e-06	High	3.173	High	3.14	High	3.54036	0
	VFDKEGNGTVMGAEIR	2	1	1	P60660		1722.85	3.03584e+07	0	3.13873e+07	0	1.835e-06	High	2.82036			High	2.86887	1
	VLGNPKSDEMNVK	3	1	1	P60660		1430.74	0	4.65261e+06	5.40721e+06	0	0.01828			High	4.1691	High	3.46241	1
	VLDFEHFLPMLQTVAK	1	1	1	P60660	M10(Oxidation)	1904	36328365	0	0	0.001	0.04729	High	1.89395					0
	ALGQNPTNAEVLKVLGNPK	3	1	1	P60660		1963.1	1.40297e+08	0	139317689	0.001	0.04427	High	1.86014			High	1.43051	1
	NKDQGTYEDYVEGLRVFDK	1	1	1	P60660		2276.09	0	1.86706e+07	0	0.001	0.04067			High	1.76613			2
	ALGQNPTNAEVLKVLGNPKSDEMNVK	1	1	1	P60660		2766.45	0	2.25143e+07	0	0.002	0.05808			High	2.2058			2
	TGDGKILYSQCGDVMRALGQNPTNAEVLK	1	1	1	P60660	C11(Carbamidomethyl)	3135.57	0	0	0	0.002	0.05449			High	1.69578			2
	EAFQLFDRTGDGKILYSQCGDVMR	1	1	1	P60660	C19(Carbamidomethyl)	2806.34	0	0	7.91232e+06	0.003	0.02428					High	2.06614	2
	ALGQNPTNAEVLKVLGNPKSDEMNVK	2	1	1	P60660	M23(Oxidation)	2782.44	60333376	6.23288e+07	0	0.005	0.1196	High	1.60383	High	1.75547			2
Q16777	Histone H2A type 2-C OS=Homo sapiens OX=9606 GN=HIST2H2AC PE=1 SV=4 - [H2A2C_HUMAN]	63.57	2	3	6	38	1.10101e+09	1.01028e+09	1.07181e+09	38.8581	63.57	5	14		0				0			129	13.9798	10.9019
	Sequence	# PSMs	# Proteins	# Protein Groups	Protein Group Accessions	Modifications	MH+ [Da]	A5: Area	B5: Area	C5: Area	q-Value	PEP	A2	XCorr A2	B2	XCorr B2	C2	XCorr C2	# Missed Cleavages
	VTIAQGGVLPNIQAVLLPK	15	5	2	P04908;Q16777		1931.18	1.85362e+08	2.04768e+08	1.96918e+08	0	0.0003306	High	4.27229	High	3.10055	High	3.64884	0
	SSRAGLQFPVGR	11	5	2	P04908;Q16777		1274.7	6.47152e+08	6.28504e+08	6.48401e+08	0	0.004498	High	3.00857	High	3.42918	High	2.70121	1
	VGAGAPVYMAAVLEYLTAEILELAGNAARDNKK	1	2	1	Q16777		3418.81	3.73873e+06	0	0	0	0.02398	High	2.72643					2
	AGLQFPVGR	9	5	2	P04908;Q16777		944.534	2.42089e+09	2.19758e+09	2.36673e+09	0	0.007569	High	2.59451	High	2.78566	High	2.69304	0
	HLQLAIRNDEELNKLLGK	1	2	1	Q16777		2104.19	2.34981e+08	0	0	0	0.01197	High	2.54747					2
	HLQLAIRNDEELNK	1	3	1	P04908		1692.91	0	9.96063e+06	0	0.009	0.1578			High	1.72584			1
Q13938	Calcyphosin OS=Homo sapiens OX=9606 GN=CAPS PE=1 SV=1 - [CAYP1_HUMAN]	63.49	1	22	22	127	9.54418e+08	9.18901e+08	9.44182e+08	96.6635	63.49	21	42	106.056	61.38	19	43	104.29	63.49	20	42	189	20.9543	4.89404
	Sequence	# PSMs	# Proteins	# Protein Groups	Protein Group Accessions	Modifications	MH+ [Da]	A5: Area	B5: Area	C5: Area	q-Value	PEP	A2	XCorr A2	B2	XCorr B2	C2	XCorr C2	# Missed Cleavages
	VRSGEWTEDEVLR	7	1	1	Q13938		1575.77	5.18896e+07	4.8166e+07	48729767	0	0.0009658	High	4.25018	High	3.66443	High	3.95259	1
	EAVIAAAFAKLDR	9	1	1	Q13938		1374.78	539820444	5.16994e+08	501606628	0	0.004241	High	3.91399	High	2.85315	High	3.28769	1
	NGSGTLDLEEFLR	3	1	1	Q13938		1450.72	41816062	41509322	5.31248e+07	0	0.00613	High	3.85722	High	3.561	High	3.2763	0
	SGEWTEDEVLR	6	1	1	Q13938		1320.61	1.98178e+08	2.02688e+08	1.88838e+08	0	0.007398	High	3.52039	High	3.29987	High	3.47635	0
	SLDADEFRQGLAK	8	1	1	Q13938		1449.73	390478841	388689204	385067554	0	5.059e-05	High	3.47371	High	3.71699	High	4.08496	1
	LDRSGDGVVTVDDLR	4	1	1	Q13938		1616.82	76465336	78451330	79482760	0	0.02494	High	3.19853	High	2.68939	High	3.1873	1
	LDRSGDGVVTVDDLRGVYSGR	9	1	1	Q13938		2236.14	6.23238e+08	5.97211e+08	6.17957e+08	0	4.048e-05	High	3.16899	High	2.88151	High	2.74766	2
	VRSGEWTEDEVLRR	6	1	1	Q13938		1731.88	1.75456e+08	1.75052e+08	1.86501e+08	0	0.0001435	High	3.11974	High	2.94902	High	3.41863	2
	GASGIQGLAR	23	1	1	Q13938		929.519	4.4523e+08	414944316	378036928	0	0.008435	High	3.06793	High	3.57493	High	3.4958	0
	ALRPPMSQAREAVIAAAFAK	5	1	1	Q13938		2098.17	4.32784e+07	3.81944e+07	4.39132e+07	0	0.03195	High	2.97183	High	2.59526	High	2.70302	1
	LGLVLDQAEAEGVCR	2	1	1	Q13938	C14(Carbamidomethyl)	1629.83	25706796	23838696	0	0	0.001802	High	2.7638	High	4.06309			0
	SGDGVVTVDDLRGVYSGR	6	1	1	Q13938		1851.92	7.09076e+08	6.64928e+08	700867977	0	0.01964	High	2.76347	High	2.13363	High	2.53595	1
	EAVIAAAFAK	9	1	1	Q13938		990.565	9.33288e+08	8.83572e+08	9.11412e+08	0	2.825e-06	High	2.75618	High	2.69911	High	2.98628	0
	SGDGVVTVDDLR	4	1	1	Q13938		1232.61	9.80535e+07	97377991	9.32289e+07	0	0.0148	High	2.69952	High	3.15724	High	2.98165	0
	LGLVLDQAEAEGVCRK	3	1	1	Q13938	C14(Carbamidomethyl)	1757.93	1.71449e+07	1.67559e+07	1.77003e+07	0	0.0008947	High	2.24432	High	2.22452	High	2.35774	1
	SGEWTEDEVLRR	6	1	1	Q13938		1476.71	1220888522	1.2082e+09	1.22027e+09	0	0.01027	High	2.18097	High	2.28586	High	2.39413	1
	AQCLSRGASGIQGLAR	3	1	1	Q13938	C3(Carbamidomethyl)	1644.86	2.89201e+07	2.74689e+07	2.79995e+07	0	0.005634	High	2.17466	High	3.61175	High	3.60388	1
	KWDRNGSGTLDLEEFLR	3	1	1	Q13938		2036.03	1.40233e+07	1.36369e+07	1.58004e+07	0	9.925e-06	High	1.7567	High	2.13523	High	2.84178	2
	SGDGVVTVDDLRGVYSGRAHPK	2	1	1	Q13938		2285.17	5.2797e+08	0	4.71489e+08	0	0.0005362	High	1.43587			High	1.81793	2
	ALRPPMSQAREAVIAAAFAKLDR	1	1	1	Q13938		2482.38	0	0	3.8767e+07	0	0.000187					High	2.35594	2
	ALRPPMSQAR	7	1	1	Q13938		1126.62	1.40465e+08	1.24748e+08	120607272	0.001	0.003781	High	2.41788	High	2.25868	High	2.36685	0
	LGLVLDQAEAEGVCRKWDR	1	1	1	Q13938	C14(Carbamidomethyl)	2215.13	1.61794e+07	0	0	0.001	0.03931	High	1.84303					2
P02042	Hemoglobin subunit delta OS=Homo sapiens OX=9606 GN=HBD PE=1 SV=2 - [HBD_HUMAN]	63.27	1	5	11	90	1.89688e+09	1.75613e+09	1.88143e+09	57.945	57.14	9	27	81.1829	57.14	9	35	65.1774	51.02	9	28	147	16.0453	8.04541
	Sequence	# PSMs	# Proteins	# Protein Groups	Protein Group Accessions	Modifications	MH+ [Da]	A5: Area	B5: Area	C5: Area	q-Value	PEP	A2	XCorr A2	B2	XCorr B2	C2	XCorr C2	# Missed Cleavages
	FFESFGDLSSPDAVMGNPK	6	1	1	P02042		2044.94	1.95758e+07	1.50065e+07	1.43015e+07	0	0.0004839	High	5.14344	High	5.46809	High	4.95093	0
	VNVDAVGGEALGR	3	1	1	P02042		1256.66	5.65974e+07	5.7576e+07	5.77612e+07	0	2.315e-10	High	4.41155	High	4.19757	High	4.71899	0
	VVAGVANALAHKYH	21	2	2	P68871;P02042		1449.8	1.73796e+09	1652787641	1.55669e+09	0	0.00609	High	3.95977	High	3.76933	High	3.42703	1
	VVAGVANALAHK	3	2	2	P68871;P02042		1149.68	3.47243e+07	2.99304e+07	3.15314e+07	0	0.01457	High	3.57289	High	2.6744	High	2.51316	0
	TAVNALWGKVNVDAVGGEALGR	1	1	1	P02042		2197.18	3.16699e+07	0	0	0	0.008945	High	3.37716					1
	FFESFGDLSSPDAVMGNPKVK	4	1	1	P02042		2272.1	2.55578e+07	2.65454e+07	3.11439e+07	0	0.002717	High	3.07877	High	3.36493	High	2.47672	1
	LLVVYPWTQR	33	3	3	P68871;P02042;P69892		1274.73	3.57797e+09	3.25334e+09	3694045102	0	3.836e-05	High	3.06213	High	2.88852	High	3.23719	0
	KVLGAFSDGLAHLDNLK	6	2	2	P68871;P02042		1797.99	8.32895e+07	6.94108e+07	7.09985e+07	0	0.003549	High	3.00919	High	2.37453	High	2.03884	1
	VLGAFSDGLAHLDNLK	7	2	2	P68871;P02042		1669.89	3.74726e+08	3.62273e+08	3.93546e+08	0	0.003755	High	1.91015	High	4.22551	High	3.49379	0
	FFESFGDLSSPDAVMGNPK	3	1	1	P02042	M15(Oxidation)	2060.93	0	4.57401e+06	4.68891e+06	0.001	0.02357			High	4.02477	High	2.8908	0
	FFESFGDLSSPDAVMGNPKVK	1	1	1	P02042	M15(Oxidation)	2288.09	0	0	0	0.001	0.03271			High	2.35552			1
	LLVVYPWTQRFFESFGDLSSPDAVMGNPK	1	1	1	P02042	M25(Oxidation)	3316.67	0	0	886983	0.001	0.0112					High	1.62786	1
	LHVDPENFR	1	2	2	P68871;P02042		1126.56	0	1.0765e+07	0	0.007	0.1298			High	1.8579			0
Q8N257	Histone H2B type 3-B OS=Homo sapiens OX=9606 GN=HIST3H2BB PE=1 SV=3 - [H2B3B_HUMAN]	61.9	1	3	9	97	3.08776e+09	3.0488e+09	3.10587e+09		0				0			95.6632	61.9	8	35	126	13.8995	10.3159
	Sequence	# PSMs	# Proteins	# Protein Groups	Protein Group Accessions	Modifications	MH+ [Da]	A5: Area	B5: Area	C5: Area	q-Value	PEP	A2	XCorr A2	B2	XCorr B2	C2	XCorr C2	# Missed Cleavages
	AMGIMNSFVNDIFER	19	10	3	P23527;P58876;Q8N257		1743.82	4.98484e+08	5.53816e+08	5.26333e+08	0	8.511e-05	High	5.53676	High	4.75735	High	4.8806	0
	AMGIMNSFVNDIFER	20	10	3	P23527;P58876;Q8N257	M2(Oxidation)	1759.82	1.13833e+08	1.10365e+08	1.02721e+08	0	0.0001468	High	5.07849	High	4.73973	High	4.71792	0
	AMGIMNSFVNDIFER	4	10	3	P23527;P58876;Q8N257	M2(Oxidation); M5(Oxidation)	1775.81	51162378	40862619	6.00897e+07	0	0.004905	High	4.36855	High	4.00692	High	4.33419	0
	HAVSEGTKAVTKYTSSK	21	10	3	P23527;P58876;Q8N257		1793.94	2.54909e+09	2.63456e+09	2.57596e+09	0	0.00243	High	4.01566	High	3.64363	High	3.33303	2
	VLKQVHPDTGISSK	12	10	3	P23527;P58876;Q8N257		1508.85	3.77821e+08	3.64385e+08	3.79271e+08	0	6.926e-05	High	3.27662	High	3.17395	High	3.32519	1
	LLLPGELAK	12	10	3	P23527;P58876;Q8N257		953.606	6.21571e+09	5.95803e+09	6.21532e+09	0	0.01828	High	2.01586	High	2.3293	High	1.98876	0
	LLLPGELAKHAVSEGTK	4	10	3	P23527;P58876;Q8N257		1763.01	0	1.20491e+08	1.29912e+08	0.001	0.02113			High	1.81921	High	1.78333	1
	HAVSEGTKAVTK	1	3	1	P23527		1227.67	0	0	0	0.002	0.05988	High	2.85624					1
	KESYSIYVYK	2	4	2	P23527;Q8N257		1279.66	1.61124e+07	0	1.34154e+07	0.002	0.0169	High	2.41959			High	2.84703	1
	STITSREVQTAVR	1	1	1	Q8N257		1447.79	0	0	44938812	0.003	0.02319					High	1.90106	1
	EVQTAVRLLLPGELAK	1	1	1	Q8N257		1737.03	0	0	3.12398e+07	0.007	0.0601					High	1.71992	1
P62805	Histone H4 OS=Homo sapiens OX=9606 GN=HIST1H4A PE=1 SV=2 - [H4_HUMAN]	61.17	1	12	12	96	1.23451e+09	1.36004e+09	1.15405e+09	43.3288	61.17	12	30	51.4362	61.17	12	32	49.8247	60.19	11	34	103	11.3604	11.356
	Sequence	# PSMs	# Proteins	# Protein Groups	Protein Group Accessions	Modifications	MH+ [Da]	A5: Area	B5: Area	C5: Area	q-Value	PEP	A2	XCorr A2	B2	XCorr B2	C2	XCorr C2	# Missed Cleavages
	ISGLIYEETR	3	1	1	P62805		1180.62	1.4358e+08	142380963	142792136	0	0.001462	High	3.52465	High	3.21537	High	3.58997	0
	TVTAMDVVYALK	7	1	1	P62805		1310.71	1.17595e+08	1.08164e+08	1.2667e+08	0	9.454e-10	High	3.46677	High	3.93699	High	4.38115	0
	DNIQGITKPAIR	14	1	1	P62805		1325.76	1801049981	1.93416e+09	1.9517e+09	0	0.001391	High	3.46397	High	3.16574	High	3.00559	0
	GVLKVFLENVIRDAVTYTEHAK	9	1	1	P62805		2502.38	1.7147e+07	1.64112e+07	2.35157e+07	0	0.02573	High	3.15574	High	2.61656	High	2.09385	2
	TVTAMDVVYALKR	13	1	1	P62805		1466.81	1.27308e+09	1.23478e+09	1.1947e+09	0	7.17e-05	High	3.14616	High	3.02218	High	3.22851	1
	ISGLIYEETRGVLK	7	1	1	P62805		1577.9	1.60869e+08	1.47934e+08	150880059	0	0.01058	High	3.03033	High	3.71875	High	4.19531	1
	RKTVTAMDVVYALK	4	1	1	P62805		1594.9	3.45238e+07	3.11499e+07	3.19027e+07	0	3.985e-05	High	2.9556	High	2.7888	High	3.31525	2
	KTVTAMDVVYALK	3	1	1	P62805		1438.8	1.37033e+07	12757934	1.3746e+07	0	2.797e-05	High	2.7963	High	2.83905	High	3.11067	1
	KTVTAMDVVYALKR	11	1	1	P62805		1594.9	1.22088e+08	9.68263e+07	9.93865e+07	0	1.865e-06	High	2.40201	High	2.53868	High	3.01456	2
	VFLENVIRDAVTYTEHAK	6	1	1	P62805		2105.11	3.76816e+07	4.79129e+07	4.54242e+07	0	1.316e-06	High	2.10499	High	2.31644	High	2.12626	1
	TVTAMDVVYALKRQGR	5	1	1	P62805		1807.99	3.23921e+08	3.19724e+08	3.15754e+08	0	1.404e-05	High	1.80436	High	1.68602	High	1.59739	2
	TVTAMDVVYALKR	3	1	1	P62805	M5(Oxidation)	1482.8	9.90056e+07	0	9.6109e+07	0	0.02084	High	1.5929			High	1.52575	1
	TVTAMDVVYALK	5	1	1	P62805	M5(Oxidation)	1326.7	1.60786e+07	14263602	1.33672e+07	0.001	0.05494	High	2.72011	High	3.17611	High	2.73146	0
	DNIQGITKPAIRR	4	1	1	P62805		1481.86	6.29399e+08	9.11189e+08	0	0.002	0.05696	High	1.70259	High	2.26931			1
	KTVTAMDVVYALKR	2	1	1	P62805	M6(Oxidation)	1610.89	5.93735e+06	0	6.11957e+06	0.006	0.1309	High	2.09331			High	1.90006	2
P01034	Cystatin-C OS=Homo sapiens OX=9606 GN=CST3 PE=1 SV=1 - [CYTC_HUMAN]	58.9	1	7	7	27	2.23527e+08	2.26908e+08	3.11869e+08	21.1183	58.22	6	10	18.2021	53.42	5	9	18.6907	39.04	5	8	146	15.7891	8.74854
	Sequence	# PSMs	# Proteins	# Protein Groups	Protein Group Accessions	Modifications	MH+ [Da]	A5: Area	B5: Area	C5: Area	q-Value	PEP	A2	XCorr A2	B2	XCorr B2	C2	XCorr C2	# Missed Cleavages
	LVGGPMDASVEEEGVR	4	1	1	P01034		1644.79	2.29988e+07	2.01791e+07	2.07496e+07	0	1.42e-08	High	3.98853	High	4.08977	High	4.30996	0
	ALDFAVGEYNK	3	1	1	P01034		1226.61	263455888	2.55947e+08	2.51313e+08	0	0.008762	High	3.33748	High	3.43179	High	3.46723	0
	KQIVAGVNYFLDVELGRTTCTK	2	1	1	P01034	C20(Carbamidomethyl)	2512.33	6.93054e+06	4.17359e+06	0	0	0.03348	High	2.84979	High	1.62706			2
	ALDFAVGEYNKASNDMYHSR	10	1	1	P01034		2288.04	3.84128e+08	4.04598e+08	4.05772e+08	0	2.31e-07	High	2.59257	High	2.9757	High	3.35943	1
	AFCSFQIYAVPWQGTMTLSK	4	1	1	P01034	C3(Carbamidomethyl)	2335.12	3.48319e+06	2.9998e+06	3.78282e+06	0.001	0.03706	High	2.19135	High	3.42104	High	2.75361	0
	KAFCSFQIYAVPWQGTMTLSKSTCQDA	1	1	1	P01034	C4(Carbamidomethyl); C24(Carbamidomethyl)	3125.46	0	0	0	0.003	0.1056	High	3.52857					2
	ALDFAVGEYNKASNDMYHSR	2	1	1	P01034	M16(Oxidation)	2304.04	6.58607e+07	0	70056943	0.003	0.02381	High	1.32435			High	1.33935	1
	LVGGPMDASVEEEGVRR	1	1	1	P01034		1800.9	0	0	278523156	0.007	0.05833					High	1.41997	1
P04406	Glyceraldehyde-3-phosphate dehydrogenase OS=Homo sapiens OX=9606 GN=GAPDH PE=1 SV=3 - [G3P_HUMAN]	57.91	1	21	21	75	5.03087e+08	4.26571e+08	4.31775e+08	53.6893	54.33	19	29	70.345	57.91	16	27	38.0893	43.58	13	19	335	36.0304	8.45557
	Sequence	# PSMs	# Proteins	# Protein Groups	Protein Group Accessions	Modifications	MH+ [Da]	A5: Area	B5: Area	C5: Area	q-Value	PEP	A2	XCorr A2	B2	XCorr B2	C2	XCorr C2	# Missed Cleavages
	WGDAGAEYVVESTGVFTTMEK	6	1	1	P04406		2277.05	3.04096e+07	3.29144e+07	2.62307e+07	0	0.0007824	High	5.41648	High	5.42153	High	3.36992	0
	VIHDNFGIVEGLMTTVHAITATQK	10	1	1	P04406		2595.36	8.9642e+07	9.15934e+07	8.98356e+07	0	0.000846	High	4.15961	High	3.51421	High	3.32479	0
	LISWYDNEFGYSNR	3	1	1	P04406		1763.81	2.44819e+07	2.2101e+07	2.58584e+07	0	9.879e-08	High	3.96598	High	4.10012	High	4.18385	0
	IISNASCTTNCLAPLAK	6	1	1	P04406	C7(Carbamidomethyl); C11(Carbamidomethyl)	1833.92	9.38506e+07	9.06651e+07	81689416	0	3.318e-08	High	3.67432	High	3.69599	High	3.71602	0
	DGRGALQNIIPASTGAAK	9	1	1	P04406		1739.94	4.93978e+08	4.85086e+08	4.8362e+08	0	0.005987	High	3.42612	High	2.80757	High	3.40041	1
	VPTANVSVVDLTCR	2	1	1	P04406	C13(Carbamidomethyl)	1530.8	5.8906e+06	4.17268e+06	0	0	0.02991	High	3.0737	High	3.43807			0
	GALQNIIPASTGAAK	6	1	1	P04406		1411.8	6.7972e+08	6.24433e+08	627379411	0	0.00368	High	2.9061	High	3.26996	High	3.54967	0
	DGRGALQNIIPASTGAAKAVGK	5	1	1	P04406		2095.17	1.89843e+08	1.70195e+08	1.84326e+08	0	0.009756	High	2.73372	High	3.32774	High	1.329	2
	TVDGPSGKLWR	4	1	1	P04406		1215.65	234673360	3.11629e+07	33015248	0	0.01898	High	1.97479	High	2.93625	High	2.48288	1
	AENGKLVINGNPITIFQERDPSK	3	1	1	P04406		2540.35	3.59988e+07	4.03131e+07	3.42441e+07	0	0.0001629	High	1.90589	High	1.84786	High	2.07148	2
	RVIISAPSADAPMFVMGVNHEKYDNSLK	2	1	1	P04406		3089.56	2.30728e+07	2.31401e+07	0	0	0.02427	High	1.62425	High	1.70711			2
	GALQNIIPASTGAAKAVGK	1	1	1	P04406		1767.01	335561850	0	0	0	0.02142	High	1.60213					1
	VVDLMAHMASKE	1	1	1	P04406		1330.65	0	1.21743e+08	0	0	0.009567			High	2.20475			1
	AVGKVIPELNGK	5	1	1	P04406		1224.73	1.21749e+08	1.26955e+08	1.25558e+08	0.001	0.00656	High	2.18604	High	2.26668	High	2.25713	1
	VIISAPSADAPMFVMGVNHEKYDNSLK	1	1	1	P04406		2933.45	1.56423e+08	0	0	0.001	0.04329	High	1.72003					1
	YDNSLKIISNASCTTNCLAPLAK	3	1	1	P04406	C13(Carbamidomethyl); C17(Carbamidomethyl)	2554.27	19035154	1.97511e+07	2.14455e+07	0.001	0.007493	High	1.62467	High	2.75027	High	2.18157	1
	VIHDNFGIVEGLMTTVHAITATQKTVDGPSGK	2	1	1	P04406		3336.73	3.46737e+07	1.90144e+07	0	0.001	0.04626	High	1.42397	High	2.81975			1
	LVINGNPITIFQERDPSK	2	1	1	P04406		2041.12	1.22645e+07	9.38049e+06	0	0.002	0.05325	High	2.2006	High	2.30446			1
	VIHDNFGIVEGLMTTVHAITATQKTVDGPSGKLWR	2	1	1	P04406		3792.01	72382815	0	7.66141e+07	0.004	0.03073	High	1.46926			High	2.146	2
	LWRDGRGALQNIIPASTGAAK	1	1	1	P04406		2195.21	0	0	3.87991e+06	0.007	0.05942					High	1.66708	2
	VIISAPSADAPMFVMGVNHEK	1	1	1	P04406		2213.11	4.53674e+07	0	0	0.008	0.1464	High	2.12189					0
P60174	Triosephosphate isomerase OS=Homo sapiens OX=9606 GN=TPI1 PE=1 SV=3 - [TPIS_HUMAN]	57.34	1	12	12	51	7.34625e+07	6.79538e+07	7.82973e+07	44.8833	46.85	9	16	52.0139	29.72	6	16	57.5913	45.45	9	19	286	30.7717	5.92236
	Sequence	# PSMs	# Proteins	# Protein Groups	Protein Group Accessions	Modifications	MH+ [Da]	A5: Area	B5: Area	C5: Area	q-Value	PEP	A2	XCorr A2	B2	XCorr B2	C2	XCorr C2	# Missed Cleavages
	SNVSDAVAQSTR	15	1	1	P60174		1234.61	8.58385e+07	7.85078e+07	8.85776e+07	0	3.889e-10	High	4.19877	High	4.45193	High	4.56944	0
	VPADTEVVCAPPTAYIDFAR	7	1	1	P60174	C9(Carbamidomethyl)	2192.08	4.84295e+07	4.66537e+07	5.94285e+07	0	7.445e-06	High	3.98188	High	4.49411	High	4.00679	0
	VVLAYEPVWAIGTGK	4	1	1	P60174		1602.89	3.17688e+07	3.08243e+07	3.64837e+07	0	0.005393	High	3.09822	High	3.85219	High	3.67943	0
	IAVAAQNCYK	11	1	1	P60174	C8(Carbamidomethyl)	1137.57	8.61195e+07	7.8484e+07	8.68857e+07	0	0.03388	High	3.03344	High	2.89163	High	2.8231	0
	HVFGESDELIGQK	4	1	1	P60174		1458.73	1.23995e+07	1.34114e+07	12263312	0	0.01018	High	2.87067	High	3.64093	High	2.94561	0
	GWLKSNVSDAVAQSTR	1	1	1	P60174		1718.88	2.70509e+06	0	0	0	0.02502	High	2.8301					1
	VVLAYEPVWAIGTGKTATPQQAQEVHEKLR	3	1	1	P60174		3319.79	4.69425e+07	4.68698e+07	4.87257e+07	0	0.0001427	High	2.20412	High	2.02687	High	3.95413	2
	QSLGELIGTLNAAKVPADTEVVCAPPTAYIDFAR	2	1	1	P60174	C23(Carbamidomethyl)	3587.86	0	0	4.4255e+06	0	0.0001478					High	3.50716	1
	KQSLGELIGTLNAAKVPADTEVVCAPPTAYIDFAR	1	1	1	P60174	C24(Carbamidomethyl)	3715.95	0	0	55629425	0	0.002324					High	1.82421	2
	KQSLGELIGTLNAAK	1	1	1	P60174		1542.89	23524571	0	0	0.001	0.05122	High	2.50812					1
	ELASQPDVDGFLVGGASLKPEFVDIINAKQ	1	1	1	P60174		3157.66	0	0	9.85015e+06	0.002	0.02042					High	1.31274	1
	VTNGAFTGEISPGMIKDCGATWVVLGHSER	1	1	1	P60174	C18(Carbamidomethyl)	3189.55	1.27128e+07	0	0	0.003	0.101	High	1.64205					1
P52943	Cysteine-rich protein 2 OS=Homo sapiens OX=9606 GN=CRIP2 PE=1 SV=1 - [CRIP2_HUMAN]	57.21	1	7	7	28	7.98504e+07	7.58929e+07	8.09364e+07	21.6344	35.58	5	9	19.9463	50.48	6	8	24.3891	42.31	6	11	208	22.478	8.71924
	Sequence	# PSMs	# Proteins	# Protein Groups	Protein Group Accessions	Modifications	MH+ [Da]	A5: Area	B5: Area	C5: Area	q-Value	PEP	A2	XCorr A2	B2	XCorr B2	C2	XCorr C2	# Missed Cleavages
	GVNIGGAGSYIYEKPLAEGPQVTGPIEVPAAR	5	1	1	P52943		3210.69	3.43383e+07	2.00247e+07	42833036	0	0.0001104	High	4.92412	High	3.75206	High	4.71572	0
	ASSVTTFTGEPNTCPR	9	1	1	P52943	C14(Carbamidomethyl)	1724.79	60617154	5.28557e+07	5.42801e+07	0	0.000779	High	3.78006	High	4.03373	High	3.81019	0
	GVNTGAVGSYIYDRDPEGK	3	1	1	P52943		1997.96	1.81453e+07	1.75404e+07	1.99765e+07	0	1.418e-05	High	3.57682	High	3.14672	High	3.69974	1
	GVNTGAVGSYIYDRDPEGKVQP	5	1	1	P52943		2322.14	114948634	112565378	116219815	0	0.01504	High	2.48654	High	2.17342	High	1.68358	2
	GVNIGGAGSYIYEKPLAEGPQVTGPIEVPAARAEER	4	1	1	P52943		3695.92	6.39855e+07	6.22577e+07	7.23092e+07	0	2.726e-07	High	1.96534	High	1.8986	High	3.1702	1
	VTSLGKDWHRPCLR	1	1	1	P52943	C12(Carbamidomethyl)	1724.91	0	0	2.77311e+07	0.003	0.02507					High	1.65668	1
	CGKTLTPGGHAEHDGQPYCHKPCYGILFGPK	1	1	1	P52943	C1(Carbamidomethyl); C19(Carbamidomethyl); C23(Carbamidomethyl)	3482.63	0	1.46018e+07	0	0.005	0.1126			High	2.36875			1
Q16555	Dihydropyrimidinase-related protein 2 OS=Homo sapiens OX=9606 GN=DPYSL2 PE=1 SV=1 - [DPYL2_HUMAN]	56.99	1	30	31	126	5.35376e+08	4.68592e+08	4.96174e+08	102.349	53.15	26	43	102.098	44.23	22	44	106.317	46.5	21	39	572	62.2546	6.37939
	Sequence	# PSMs	# Proteins	# Protein Groups	Protein Group Accessions	Modifications	MH+ [Da]	A5: Area	B5: Area	C5: Area	q-Value	PEP	A2	XCorr A2	B2	XCorr B2	C2	XCorr C2	# Missed Cleavages
	AITIANQTNCPLYITK	8	1	1	Q16555	C10(Carbamidomethyl)	1820.96	168950073	1.5051e+08	1.5969e+08	0	0.0009582	High	5.39569	High	4.79112	High	4.77682	0
	MDENQFVAVTSTNAAK	3	3	3	Q14194;Q16555;Q14195		1725.82	1.9715e+07	1.67455e+07	1.64867e+07	0	2.683e-07	High	4.77257	High	4.19616	High	4.77005	0
	AVGKDNFTLIPEGTNGTEER	7	1	1	Q16555		2148.06	1.46039e+08	1.4526e+08	1.36682e+08	0	0.001242	High	4.73594	High	4.08611	High	4.13852	1
	FQMPDQGMTSADDFFQGTK	11	1	1	Q16555		2150.92	5.46588e+07	70140915	80578444	0	2.382e-08	High	4.29218	High	4.6234	High	4.77274	0
	IAVGSDADLVIWDPDSVK	2	1	1	Q16555		1899.97	5.70119e+06	4.53934e+06	0	0	0.0004813	High	3.84377	High	3.38662			0
	GLYDGPVCEVSVTPK	8	1	1	Q16555	C8(Carbamidomethyl)	1620.8	368211305	3.28867e+08	3.4363e+08	0	1.503e-08	High	3.58162	High	3.83836	High	4.41972	0
	SSAEVIAQAR	11	1	1	Q16555		1031.55	1.42989e+08	104558006	1.33738e+08	0	0.009411	High	3.19747	High	3.28199	High	3.03781	0
	TSPAKQQAPPVRNLHQSGFSLSGAQIDDNIPR	4	1	1	Q16555		3429.77	1.24572e+07	1.06474e+07	4.91695e+06	0	0.01466	High	2.99271	High	2.46902	High	2.47401	2
	ILDLGITGPEGHVLSRPEEVEAEAVNR	12	1	1	Q16555		2900.52	8.89662e+08	752376209	8.08321e+08	0	3.229e-06	High	2.90108	High	2.88742	High	2.92867	0
	NLHQSGFSLSGAQIDDNIPR	3	1	1	Q16555		2169.07	4.11337e+07	4.19447e+07	4.48539e+07	0	0.00543	High	2.87355	High	3.80003	High	2.50089	0
	KPFPDFVYKR	7	1	1	Q16555		1296.71	5.68961e+07	6.02498e+07	5.26219e+07	0	0.00153	High	2.82361	High	2.3761	High	1.79733	1
	MDENQFVAVTSTNAAKVFNLYPR	4	1	1	Q16555		2615.3	1.1887e+07	1.14842e+07	5.5817e+06	0	0.009769	High	2.81401	High	1.96673	High	2.53776	1
	GVPRGLYDGPVCEVSVTPK	4	1	1	Q16555	C12(Carbamidomethyl)	2030.05	6.91392e+07	67103461	6.77876e+07	0	0.008985	High	2.69882	High	4.11753	High	3.80688	1
	DNFTLIPEGTNGTEER	1	1	1	Q16555		1792.84	1.90657e+07	0	0	0	0.03428	High	2.41507					0
	MVIPGGIDVHTR	5	1	1	Q16555		1294.69	3.48256e+08	3.24533e+08	3.36572e+08	0	0.01638	High	2.39329	High	1.86097	High	1.51522	0
	AITIANQTNCPLYITKVMSK	3	1	1	Q16555	C10(Carbamidomethyl)	2266.2	6.10156e+07	6.44773e+07	6.09934e+07	0	0.03027	High	2.06563	High	1.60322	High	1.68906	1
	GLYDGPVCEVSVTPKTVTPASSAK	3	1	1	Q16555	C8(Carbamidomethyl)	2463.25	3.15345e+07	0	2.98055e+07	0	0.01528	High	1.78618			High	2.1495	1
	KKGTVVYGEPITASLGTDGSHYWSK	3	1	1	Q16555		2681.36	64403295	6.56399e+07	6.91287e+07	0	0.0008224	High	1.66464	High	1.95869	High	2.12625	2
	IAVGSDADLVIWDPDSVKTISAK	4	1	1	Q16555		2400.28	8.42784e+07	7.3032e+07	7.94709e+07	0	0.0004832	High	1.44297	High	1.7473	High	2.38976	1
	VMSKSSAEVIAQAR	4	1	1	Q16555		1476.79	0	5.81914e+07	5.83758e+07	0	8.062e-06			High	3.76295	High	3.86003	1
	LAELRGVPRGLYDGPVCEVSVTPK	1	1	1	Q16555	C17(Carbamidomethyl)	2612.39	0	6.39712e+07	0	0	0.01439			High	1.97392			2
	MSVIWDKAVVTGK	1	1	1	Q16555		1433.79	0	0	2.05771e+06	0	0.0003553					High	3.80802	1
	FQMPDQGMTSADDFFQGTK	2	1	1	Q16555	M8(Oxidation)	2166.92	7.50463e+06	0	8.68332e+06	0.001	0.00409	High	3.31637			High	4.20367	0
	MVIPGGIDVHTR	3	1	1	Q16555	M1(Oxidation)	1310.69	3.14549e+07	3.29896e+07	3.41834e+07	0.001	0.00282	High	2.14513	High	2.49768	High	2.48204	0
	GTVVYGEPITASLGTDGSHYWSKNWAK	3	1	1	Q16555		2924.42	47243902	4.13813e+07	5.04249e+07	0.001	0.005056	High	1.41342	High	2.49783	High	2.13724	1
	IVLEDGTLHVTEGSGR	1	1	1	Q16555		1682.87	0	0	0	0.003	0.07757	High	2.24018					0
	KGTVVYGEPITASLGTDGSHYWSKNWAK	2	1	1	Q16555		3052.52	1.37926e+07	13301180	0	0.004	0.07036	High	1.58469	High	2.73801			2
	YIPRKPFPDFVYKR	1	1	1	Q16555		1826.01	0	1.89882e+07	0	0.004	0.1069			High	1.42191			2
	IVAPPGGRANITSLG	1	1	1	Q16555		1422.81	5.53568e+07	0	0	0.005	0.115	High	2.31013					1
	QQAPPVRNLHQSGFSLSGAQIDDNIPR	1	1	1	Q16555		2945.5	1.17777e+07	0	0	0.006	0.1252	High	1.96767					1
	QIGENLIVPGGVKTIEAHSR	1	1	1	Q16555		2118.17	31881444	0	0	0.006	0.1268	High	1.45928					1
	GTVVYGEPITASLGTDGSHYWSK	1	1	1	Q16555		2425.17	9.24275e+06	0	0	0.008	0.1453	High	1.63019					0
	TVTPASSAKTSPAKQQAPPVR	1	1	1	Q16555		2122.17	0	0	18478850	0.009	0.06459					High	1.96568	2
Q06830	Peroxiredoxin-1 OS=Homo sapiens OX=9606 GN=PRDX1 PE=1 SV=1 - [PRDX1_HUMAN]	54.77	1	10	11	48	1.69978e+08	1.71279e+08	1.64602e+08	29.1257	54.77	11	17	22.3499	49.25	8	16	24.6406	51.26	9	15	199	22.0963	8.1333
	Sequence	# PSMs	# Proteins	# Protein Groups	Protein Group Accessions	Modifications	MH+ [Da]	A5: Area	B5: Area	C5: Area	q-Value	PEP	A2	XCorr A2	B2	XCorr B2	C2	XCorr C2	# Missed Cleavages
	TIAQDYGVLKADEGISFR	6	1	1	Q06830		1983.02	165541056	159976924	154329388	0	0.001042	High	4.11393	High	3.84019	High	3.40737	1
	HGEVCPAGWKPGSDTIKPDVQK	2	1	1	Q06830	C5(Carbamidomethyl)	2406.19	5.22191e+07	0	4.69486e+07	0	0.0139	High	3.58144			High	3.25315	0
	QITVNDLPVGR	3	2	2	Q06830;P32119		1211.68	1.9098e+08	1.97977e+08	1.84739e+08	0	0.008422	High	2.93649	High	2.16777	High	1.98609	0
	QGGLGPMNIPLVSDPKR	3	1	1	Q06830		1778.96	8.4414e+07	8.11463e+07	81272251	0	0.01787	High	2.70977	High	2.63674	High	1.83023	1
	GLFIIDDKGILRQITVNDLPVGR	10	1	1	Q06830		2552.47	1.28206e+08	1.45943e+08	1.31622e+08	0	0.015	High	2.56862	High	3.28939	High	2.72861	2
	KQGGLGPMNIPLVSDPKR	9	1	1	Q06830		1907.06	153412019	1.55885e+08	1.54738e+08	0	0.01276	High	2.51294	High	2.54985	High	2.8055	2
	LVQAFQFTDK	3	1	1	Q06830		1196.63	2.64085e+07	2.75339e+07	2.91351e+07	0	6.595e-05	High	2.41451	High	2.67119	High	2.5862	0
	GLFIIDDKGILR	5	1	1	Q06830		1359.8	6.18339e+07	5.91382e+07	6.76307e+07	0	0.02575	High	1.45741	High	1.60235	High	1.28901	1
	ATAVMPDGQFK	2	1	1	Q06830		1164.57	2.84782e+07	0	2.95312e+07	0.001	0.006581	High	2.64686			High	3.02773	0
	KQGGLGPMNIPLVSDPKR	1	1	1	Q06830	M8(Oxidation)	1923.05	32811760	0	0	0.001	0.0543	High	2.47544					2
	LVQAFQFTDKHGEVCPAGWKPGSDTIKPDVQK	1	1	1	Q06830	C15(Carbamidomethyl)	3583.81	7.86503e+07	0	0	0.001	0.05068	High	1.72127					1
	SVDETLRLVQAFQFTDKHGEVCPAGWKPGSDTIKPDVQK	3	1	1	Q06830	C22(Carbamidomethyl)	4384.22	3.17519e+07	3.16851e+07	0	0.004	0.0731	High	3.16575	High	2.51199			2
Q15836	Vesicle-associated membrane protein 3 OS=Homo sapiens OX=9606 GN=VAMP3 PE=1 SV=3 - [VAMP3_HUMAN]	53	1	5	5	24	8.26281e+07	7.98019e+07	8.75885e+07	21.5364	53	5	8	21.2081	53	4	7	27.7407	53	5	9	100	11.302	8.79248
	Sequence	# PSMs	# Proteins	# Protein Groups	Protein Group Accessions	Modifications	MH+ [Da]	A5: Area	B5: Area	C5: Area	q-Value	PEP	A2	XCorr A2	B2	XCorr B2	C2	XCorr C2	# Missed Cleavages
	LQQTQNQVDEVVDIMR	12	1	1	Q15836		1915.96	123330134	1.43028e+08	1.31151e+08	0	1.994e-12	High	4.86543	High	5.16271	High	5.49885	0
	DQKLSELDDRADALQAGASQFETSAAK	3	1	1	Q15836		2865.39	1.32067e+07	1.48367e+07	1.35194e+07	0	0.0001286	High	3.42201	High	2.31384	High	2.62603	2
	RLQQTQNQVDEVVDIMR	3	1	1	Q15836		2072.06	6.68872e+07	6.25914e+07	65394323	0	1.484e-10	High	2.48641	High	3.56888	High	4.33786	1
	VNVDKVLERDQK	2	1	1	Q15836		1442.8	5.7667e+07	0	6.62202e+07	0	2.557e-05	High	2.30366			High	2.20337	2
	VNVDKVLER	4	1	1	Q15836		1071.62	0	3.37865e+07	3.36164e+07	0.001	0.006153	High	1.87864	High	1.59848	High	2.53824	1
P49006	MARCKS-related protein OS=Homo sapiens OX=9606 GN=MARCKSL1 PE=1 SV=2 - [MRP_HUMAN]	51.28	1	3	3	3	5.65791e+06	2.35521e+06	1.69216e+07	7.84304	51.28	3	3		0				0			195	19.5172	4.66553
	Sequence	# PSMs	# Proteins	# Protein Groups	Protein Group Accessions	Modifications	MH+ [Da]	A5: Area	B5: Area	C5: Area	q-Value	PEP	A2	XCorr A2	B2	XCorr B2	C2	XCorr C2	# Missed Cleavages
	NRKEGGGDSSASSPTEEEQEQGEIGACSDEGTAQEGK	1	1	1	P49006	C27(Carbamidomethyl)	3811.62	0	0	0	0	0.0001444	High	5.51006					2
	GAEASAASEEEAGPQATEPSTPSGPESGPTPASAEQNE	1	1	1	P49006		3625.56	7.66217e+06	0	0	0.002	0.05568	High	2.33298					0
	GDVTAEEAAGASPAKANGQENGHVK	1	1	1	P49006		2408.15	3.65366e+06	0	0	0.006	0.1265	High	2.10081					1
P06733	Alpha-enolase OS=Homo sapiens OX=9606 GN=ENO1 PE=1 SV=2 - [ENOA_HUMAN]	50.23	1	16	16	40	6.94419e+07	6.44166e+07	5.21336e+07	37.7948	40.09	13	16	26.4322	46.08	13	14	31.997	27.19	8	10	434	47.1393	7.38623
	Sequence	# PSMs	# Proteins	# Protein Groups	Protein Group Accessions	Modifications	MH+ [Da]	A5: Area	B5: Area	C5: Area	q-Value	PEP	A2	XCorr A2	B2	XCorr B2	C2	XCorr C2	# Missed Cleavages
	VNQIGSVTESLQACK	3	1	1	P06733	C14(Carbamidomethyl)	1633.83	1.119e+07	9.34601e+06	10432795	0	0.0006964	High	4.755	High	4.19159	High	4.7425	0
	EIFDSRGNPTVEVDLFTSKGLFR	4	1	1	P06733		2627.36	4.89145e+06	4.73172e+06	5.8599e+06	0	3.681e-09	High	4.09524	High	3.57961	High	4.29459	2
	AAVPSGASTGIYEALELR	2	1	1	P06733		1804.94	5.87655e+06	0	0	0	0.001036	High	3.73711					0
	AVEHINKTIAPALVSK	4	1	1	P06733		1690.99	8.05536e+07	7.82631e+07	1.10358e+06	0	0.0002265	High	3.29942	High	2.41481	High	3.2068	1
	EIFDSRGNPTVEVDLFTSK	3	1	1	P06733		2154.08	1.96071e+07	1.7019e+07	2.03276e+07	0	0.002804	High	3.18726	High	3.83986	High	2.48394	1
	LAQANGWGVMVSHR	2	1	1	P06733		1525.77	1.27184e+06	0	0	0	0.01885	High	3.04863	High	2.70372			0
	SGKYDLDFKSPDDPSR	3	1	1	P06733		1826.86	3.5032e+07	3.41549e+07	3.86148e+07	0	0.0008933	High	2.44423	High	2.04288	High	3.29659	2
	YNQLLRIEEELGSKAK	6	1	1	P06733		1891.03	4.54349e+07	42651747	4.28075e+07	0	7.59e-05	High	2.32684	High	2.32428	High	2.82221	2
	YGKDATNVGDEGGFAPNILENKEGLELLK	3	1	1	P06733		3091.57	6.55387e+07	6.33383e+07	63204987	0	1.618e-06	High	1.66894	High	1.90383	High	2.97174	2
	SGETEDTFIADLVVGLCTGQIKTGAPCRSER	1	1	1	P06733	C17(Carbamidomethyl); C27(Carbamidomethyl)	3367.65	0	0	0	0	0.01568			High	2.56307			2
	AGAVEKGVPLYR	2	1	1	P06733		1259.71	40229735	4.36601e+07	0	0.001	0.04484	High	2.32131	High	2.02557			1
	LAKYNQLLR	2	1	1	P06733		1118.67	0	5.16485e+07	5.03883e+07	0.001	0.04944			High	2.76336	High	2.49231	1
	DATNVGDEGGFAPNILENKEGLELLK	1	1	1	P06733		2743.38	1.18096e+07	0	0	0.003	0.07798	High	2.39176					1
	AVNEKSCNCLLLK	1	1	1	P06733	C7(Carbamidomethyl); C9(Carbamidomethyl)	1548.79	0	2.3595e+07	0	0.004	0.0951			High	1.31657			1
	YISPDQLADLYK	2	1	1	P06733		1425.73	9.91238e+06	1.01025e+07	0	0.005	0.122	High	2.60875	High	2.3506			0
	LAKYNQLLRIEEELGSK	1	1	1	P06733		2004.12	6.22333e+07	0	0	0.007	0.1321	High	1.88164					2
P68104	Elongation factor 1-alpha 1 OS=Homo sapiens OX=9606 GN=EEF1A1 PE=1 SV=1 - [EF1A1_HUMAN]	50.22	2	16	16	66	3.3368e+08	3.68728e+08	3.05563e+08	39.7148	50	13	20	54.0371	39.18	14	24	40.3837	39.39	12	22	462	50.1091	9.01221
	Sequence	# PSMs	# Proteins	# Protein Groups	Protein Group Accessions	Modifications	MH+ [Da]	A5: Area	B5: Area	C5: Area	q-Value	PEP	A2	XCorr A2	B2	XCorr B2	C2	XCorr C2	# Missed Cleavages
	SGDAAIVDMVPGKPMCVESFSDYPPLGR	14	2	1	P68104	C16(Carbamidomethyl)	2995.41	44105274	113259367	106866882	0	8.417e-08	High	3.85295	High	4.04885	High	4.47171	0
	EHALLAYTLGVK	3	2	1	P68104		1314.74	1.3437e+07	1.20909e+07	1.33524e+07	0	0.004556	High	3.68107	High	2.62747	High	2.5716	0
	IGGIGTVPVGR	6	2	1	P68104		1025.61	5.44283e+08	5.18143e+08	5.24866e+08	0	0.0004212	High	3.13978	High	2.85222	High	2.65797	0
	VETGVLKPGMVVTFAPVNVTTEVK	7	2	1	P68104		2515.39	1.2614e+08	1.17013e+08	1.35059e+08	0	0.0005421	High	2.92765	High	3.11281	High	3.66338	0
	DMRQTVAVGVIK	4	2	1	P68104		1316.74	3.05296e+07	3.02215e+07	3.13241e+07	0	0.0143	High	2.78977	High	2.65549	High	2.4419	1
	VETGVLKPGMVVTFAPVNVTTEVK	4	2	1	P68104	M10(Oxidation)	2531.38	11505473	0	0	0	0.004905	High	2.40374	High	3.03772			0
	FAVRDMRQTVAVGVIK	3	2	1	P68104		1790.01	2.03403e+07	1.82977e+07	1.82691e+07	0	0.01215	High	2.32304	High	2.55397	High	1.90545	2
	DGNASGTTLLEALDCILPPTRPTDKPLRLPLQDVYK	3	2	1	P68104	C15(Carbamidomethyl)	3978.11	2.22065e+08	3.74707e+08	0	0	0.01455	High	2.27578	High	1.25019	High	1.7476	1
	TIEKFEKEAAEMGK	4	2	1	P68104		1610.81	2.05925e+08	185514651	2.06924e+08	0	0.0001799	High	2.20111	High	2.37649	High	3.53148	2
	IGGIGTVPVGRVETGVLKPGMVVTFAPVNVTTEVK	2	2	1	P68104		3521.99	0	2.13334e+08	0	0	0.01398	High	2.19726	High	3.16418			1
	RGNVAGDSKNDPPMEAAGFTAQVIILNHPGQISAGYAPVLDCHTAHIACK	2	1	1	P68104	C42(Carbamidomethyl); C49(Carbamidomethyl)	5269.59	2.34693e+08	0	0	0	0.02573	High	2.02302					2
	QTVAVGVIKAVDKK	3	2	1	P68104		1455.89	5.05591e+07	5.31868e+07	5.44016e+07	0	0.01895	High	1.97692	High	1.54288	High	1.75275	2
	THINIVVIGHVDSGKSTTTGHLIYK	3	2	1	P68104		2690.46	71089005	1.28547e+07	7.63535e+07	0	0.03213	High	1.72591	High	1.68633	High	1.73682	1
	KDGNASGTTLLEALDCILPPTRPTDKPLRLPLQDVYK	2	2	1	P68104	C16(Carbamidomethyl)	4106.2	0	0	1.849e+08	0.001	0.004901					High	1.7235	2
	IGGIGTVPVGRVETGVLKPGMVVTFAPVNVTTEVK	1	2	1	P68104	M21(Oxidation)	3537.99	0	8637847	0	0.003	0.06034			High	2.64386			1
	KLEDGPKFLK	3	2	1	P68104		1174.69	1.35697e+08	1.24054e+08	1.32461e+08	0.004	0.09178	High	2.04259	High	2.07466	High	1.7281	2
	FLKSGDAAIVDMVPGKPMCVESFSDYPPLGR	1	2	1	P68104	C19(Carbamidomethyl)	3383.66	0	0	0	0.004	0.09597			High	2.18892			1
	STTTGHLIYK	1	2	1	P68104		1120.6	0	0	0	0.007	0.1341			High	2.43043			0
P0DOY2	Immunoglobulin lambda constant 2 OS=Homo sapiens OX=9606 GN=IGLC2 PE=1 SV=1 - [IGLC2_HUMAN]	50	5	4	4	6	2.11876e+07	3.41829e+07	2.38976e+07	11.7582	40.57	3	4		0			2.07711	50	2	2	106	11.2865	7.23975
	Sequence	# PSMs	# Proteins	# Protein Groups	Protein Group Accessions	Modifications	MH+ [Da]	A5: Area	B5: Area	C5: Area	q-Value	PEP	A2	XCorr A2	B2	XCorr B2	C2	XCorr C2	# Missed Cleavages
	SYSCQVTHEGSTVEK	1	5	1	P0DOY2	C4(Carbamidomethyl)	1711.76	1.19524e+06	0	0	0	0.02085	High	3.71347					0
	SYSCQVTHEGSTVEKTVAPTECS	3	5	1	P0DOY2	C4(Carbamidomethyl); C22(Carbamidomethyl)	2557.13	3.90506e+07	0	3.66562e+07	0	0.001039	High	3.05224			High	2.07711	1
	QSNNKYAASSYLSLTPEQWK	1	5	1	P0DOY2		2315.13	2.33169e+07	0	0	0	0.02351	High	2.96872					1
	AGVETTTPSKQSNNKYAASSYLSLTPEQWK	1	2	1	P0DOY2		3286.64	0	0	1.11391e+07	0.001	0.008209					High	1.82695	2
P21291	Cysteine and glycine-rich protein 1 OS=Homo sapiens OX=9606 GN=CSRP1 PE=1 SV=3 - [CSRP1_HUMAN]	49.74	1	6	6	16	3.74764e+07	3.19417e+07	3.7522e+07	12.9962	47.67	4	6	10.7726	21.76	4	5	11.6357	47.67	5	5	193	20.5538	8.57275
	Sequence	# PSMs	# Proteins	# Protein Groups	Protein Group Accessions	Modifications	MH+ [Da]	A5: Area	B5: Area	C5: Area	q-Value	PEP	A2	XCorr A2	B2	XCorr B2	C2	XCorr C2	# Missed Cleavages
	GFGFGQGAGALVHSE	2	1	1	P21291		1433.68	2.25018e+07	0	2.35963e+07	0	0.01848	High	3.91592			High	3.16923	0
	CSQAVYAAEKVIGAGK	5	1	1	P21291	C1(Carbamidomethyl)	1651.85	7.66506e+07	7.05587e+07	7.42933e+07	0	0.003902	High	3.36608	High	4.36746	High	2.41157	1
	GLESTTLADKDGEIYCKGCYAK	4	1	1	P21291	C16(Carbamidomethyl); C19(Carbamidomethyl)	2479.16	1.25822e+07	9.93494e+06	1.08448e+07	0	0.000224	High	2.99162	High	3.85294	High	3.98779	2
	GYGYGQGAGTLSTDKGESLGIKHEEAPGHRPTTNPNASK	2	1	1	P21291		3982.93	1.32767e+07	0	14676417	0.001	0.007283	High	1.22613			High	1.21144	2
	GLESTTLADKDGEIYCK	2	1	1	P21291	C16(Carbamidomethyl)	1899.91	0	9.22125e+06	1.03855e+07	0.001	0.04491			High	1.5118	High	2.06711	1
	CSQAVYAAEKVIGAGKSWHK	1	1	1	P21291	C1(Carbamidomethyl)	2190.12	0	1.53315e+07	0	0.003	0.06215			High	1.86284			2
P04899	Guanine nucleotide-binding protein G(i) subunit alpha-2 OS=Homo sapiens OX=9606 GN=GNAI2 PE=1 SV=3 - [GNAI2_HUMAN]	49.58	1	11	14	34	9.0376e+07	1.06327e+08	8.50352e+07	25.7994	40	10	11	26.336	27.61	9	12	24.2752	29.3	10	11	355	40.4251	5.5415
	Sequence	# PSMs	# Proteins	# Protein Groups	Protein Group Accessions	Modifications	MH+ [Da]	A5: Area	B5: Area	C5: Area	q-Value	PEP	A2	XCorr A2	B2	XCorr B2	C2	XCorr C2	# Missed Cleavages
	EYQLNDSAAYYLNDLER	4	1	1	P04899		2076.96	1.04778e+07	1.3549e+07	8.50662e+06	0	0.0002394	High	4.83575	High	5.48682	High	4.98866	0
	AVVYSNTIQSIMAIVK	2	1	1	P04899		1736.97	0	0	0	0	0.007076	High	3.84168			High	3.05111	0
	SREYQLNDSAAYYLNDLER	3	1	1	P04899		2320.09	9.13214e+07	75684525	85360120	0	1.779e-05	High	3.63218	High	2.99727	High	3.74022	1
	LWADHGVQACFGR	4	1	1	P04899	C10(Carbamidomethyl)	1516.72	7.48144e+07	7.54593e+07	7.91338e+07	0	0.001739	High	3.44307	High	3.8256	High	3.03697	0
	RLWADHGVQACFGR	5	1	1	P04899	C11(Carbamidomethyl)	1672.82	5.08276e+07	4.77388e+07	5.40359e+07	0	3.798e-06	High	3.08597	High	2.73165	High	4.36746	1
	IAQSDYIPTQQDVLR	3	1	1	P04899		1746.91	104992187	8.89721e+07	9.06116e+07	0	0.01798	High	2.60871	High	2.72706	High	2.70247	0
	EVKLLLLGAGESGKSTIVK	3	2	2	P04899;P08754		1942.16	8.63291e+06	8.61322e+06	8.58705e+06	0	0.03012	High	2.3035	High	2.05819	High	1.60068	2
	LLLLGAGESGK	1	6	5	Q14344;P04899;P08754;P09471;P63092		1057.63	0	1.54325e+08	0	0	0.002137			High	2.712			0
	AMGNLQIDFADPSRADDAR	1	1	1	P04899		2062.96	4.20244e+07	0	0	0.001	0.03462	High	2.00586					1
	IIHEDGYSEEECRQYR	2	1	1	P04899	C12(Carbamidomethyl)	2083.92	9.36035e+06	0	7.30477e+06	0.001	0.00982	High	1.58947			High	1.36864	1
	ITHSPLTICFPEYTGANKYDEAASYIQSK	1	1	1	P04899	C9(Carbamidomethyl)	3304.59	0	3.34778e+07	0	0.001	0.04502			High	3.10704			1
	QLFALSCTAEEQGVLPDDLSGVIRR	1	1	1	P04899	C7(Carbamidomethyl)	2774.42	5.62587e+06	0	0	0.003	0.1033	High	2.34622					1
	IAQSDYIPTQQDVLRTR	3	1	1	P04899		2004.05	0	7.54719e+07	7.54117e+07	0.004	0.08794			High	1.63581	High	1.88922	1
	LLLLGAGESGKSTIVKQMK	1	3	3	P04899;P09471;P08754		1973.15	0	0	7.19593e+07	0.007	0.05578					High	1.50123	2
P07355	Annexin A2 OS=Homo sapiens OX=9606 GN=ANXA2 PE=1 SV=2 - [ANXA2_HUMAN]	49.56	1	15	15	61	1.01725e+08	9.5114e+07	9.34016e+07	72.306	49.56	15	23	62.2504	42.77	11	19	53.5353	38.64	11	19	339	38.5798	7.75244
	Sequence	# PSMs	# Proteins	# Protein Groups	Protein Group Accessions	Modifications	MH+ [Da]	A5: Area	B5: Area	C5: Area	q-Value	PEP	A2	XCorr A2	B2	XCorr B2	C2	XCorr C2	# Missed Cleavages
	SLYYYIQQDTKGDYQK	1	1	1	P07355		2012.96	0	0	0	0	0.0005101	High	4.87073					1
	GLGTDEDSLIEIICSR	5	1	1	P07355	C14(Carbamidomethyl)	1777.87	24634910	2.39016e+07	2.38973e+07	0	0.01237	High	4.13272	High	4.64246	High	3.92721	0
	AEDGSVIDYELIDQDAR	4	1	1	P07355		1908.88	7599215	5.41675e+06	3.89799e+06	0	0.03333	High	4.0831	High	4.32767	High	3.80822	0
	RAEDGSVIDYELIDQDAR	3	1	1	P07355		2064.99	7.29002e+07	6.50116e+07	7.09349e+07	0	4.18e-11	High	3.98576	High	3.74947	High	4.94208	1
	LSLEGDHSTPPSAYGSVK	7	1	1	P07355		1844.91	1.61088e+08	1.60398e+08	1.62131e+08	0	0.005125	High	3.88268	High	4.69863	High	3.42155	0
	SNAQRQDIAFAYQR	7	1	1	P07355		1667.83	4.66326e+07	4.30931e+07	4.71224e+07	0	5.264e-07	High	3.75793	High	3.81549	High	4.38972	1
	TNQELQEINR	5	1	1	P07355		1244.63	1.5487e+07	13698898	1.53769e+07	0	0.003198	High	3.74741	High	3.81969	High	3.66428	0
	GVDEVTIVNILTNR	6	1	1	P07355		1542.86	1.92101e+07	1.79307e+07	1.56548e+07	0	0.006079	High	3.65512	High	3.93679	High	3.8233	0
	GTDVPKWISIMTER	2	1	1	P07355		1632.84	6.58585e+07	0	0	0	0.03227	High	3.54372					1
	TDLEKDIISDTSGDFRK	6	1	1	P07355		1939.97	2.02612e+07	2.42205e+07	2.16945e+07	0	6.209e-08	High	2.97853	High	4.07731	High	4.52129	2
	KGTDVPKWISIMTER	6	1	1	P07355		1760.94	7.11884e+07	5.99329e+07	3.66747e+07	0	0.0009194	High	2.60549	High	2.91606	High	2.68706	2
	TNQELQEINRVYKEMYK	3	1	1	P07355		2186.11	1.36826e+07	0	4.71384e+07	0	0.0006242	High	2.5557			High	2.48124	2
	GRRAEDGSVIDYELIDQDAR	3	1	1	P07355		2278.11	3.68181e+07	3.41338e+07	4.0246e+07	0	0.005524	High	2.36486	High	2.83772	High	1.92351	2
	AYTNFDAERDALNIETAIKTK	2	1	1	P07355		2384.23	1.0008e+07	6.22954e+06	0	0.001	0.0332	High	2.52393	High	3.87992			2
	AYTNFDAERDALNIETAIK	1	1	1	P07355		2155.07	1.26791e+07	0	0	0.001	0.04804	High	2.45709					1
P04733	Metallothionein-1F OS=Homo sapiens OX=9606 GN=MT1F PE=1 SV=1 - [MT1F_HUMAN]	49.18	1	2	2	9	1.26409e+07	6.60584e+06	5.51362e+06	6.3938	49.18	2	2	8.9002	49.18	2	3	11.9182	49.18	2	4	61	6.08122	7.82568
	Sequence	# PSMs	# Proteins	# Protein Groups	Protein Group Accessions	Modifications	MH+ [Da]	A5: Area	B5: Area	C5: Area	q-Value	PEP	A2	XCorr A2	B2	XCorr B2	C2	XCorr C2	# Missed Cleavages
	CAQGCVCKGASEKCSCCD	4	1	1	P04733	C1(Carbamidomethyl); C5(Carbamidomethyl); C7(Carbamidomethyl); C14(Carbamidomethyl); C16(Carbamidomethyl); C17(Carbamidomethyl)	2136.78	1.26409e+07	1.10741e+07	9.37796e+06	0	0.0002168	High	3.28202	High	2.75343	High	3.14996	2
	SCCSCCPVGCSK	5	1	1	P04733	C2(Carbamidomethyl); C3(Carbamidomethyl); C5(Carbamidomethyl); C6(Carbamidomethyl); C10(Carbamidomethyl)	1461.51	0	2.1376e+06	1.64927e+06	0	0.01464	High	3.11178	High	3.28221	High	3.09057	0
P14618	Pyruvate kinase PKM OS=Homo sapiens OX=9606 GN=PKM PE=1 SV=4 - [KPYM_HUMAN]	48.4	1	20	20	73	5.11073e+08	5.0545e+08	5.48305e+08	59.2697	46.14	18	24	63.1077	43.13	16	24	68.7326	42.56	15	25	531	57.9	7.84033
	Sequence	# PSMs	# Proteins	# Protein Groups	Protein Group Accessions	Modifications	MH+ [Da]	A5: Area	B5: Area	C5: Area	q-Value	PEP	A2	XCorr A2	B2	XCorr B2	C2	XCorr C2	# Missed Cleavages
	GADFLVTEVENGGSLGSK	6	1	1	P14618		1779.87	9.15548e+07	7.07271e+07	7.86552e+07	0	0.0001574	High	5.87135	High	4.92211	High	5.2089	0
	KGVNLPGAAVDLPAVSEKDIQDLK	5	1	1	P14618		2477.36	1.43966e+07	9.89394e+06	1.12963e+07	0	0.007264	High	4.43965	High	4.2374	High	4.04267	2
	LAPITSDPTEATAVGAVEASFK	7	1	1	P14618		2175.12	2.27723e+07	2.50559e+07	2.23439e+07	0	0.0006566	High	4.39779	High	4.54258	High	4.12127	0
	RFDEILEASDGIMVAR	3	1	1	P14618		1821.92	2.32002e+07	2.0145e+07	2.24623e+07	0	0.001003	High	4.21852	High	3.16519	High	4.16033	1
	NTGIICTIGPASR	5	1	1	P14618	C6(Carbamidomethyl)	1359.71	4.84482e+08	4.87733e+08	4.94389e+08	0	0.001012	High	3.92529	High	4.33226	High	3.80185	0
	LDIDSPPITAR	3	1	1	P14618		1197.65	3.98476e+07	3.95334e+07	33471483	0	0.01452	High	3.37336	High	3.27038	High	3.31873	0
	TGLIKGSGTAEVELKK	4	1	1	P14618		1630.94	4.25686e+07	4.66533e+07	5.22286e+07	0	6.325e-05	High	2.67782	High	2.72311	High	3.52471	2
	AGKPVICATQMLESMIK	2	1	1	P14618	C7(Carbamidomethyl)	1876.97	2.74673e+07	3.02538e+07	0	0	0.0054	High	2.65394	High	2.28063			0
	GADFLVTEVENGGSLGSKK	3	1	1	P14618		1907.97	4.73091e+07	4.40515e+07	4.1989e+07	0	0.0195	High	2.45116	High	2.35672	High	2.75046	1
	SVETLKEMIKSGMNVAR	7	1	1	P14618		1893	1.02714e+08	1.05828e+08	1.01964e+08	0	0.002048	High	2.08541	High	2.03274	High	2.52499	2
	APIIAVTRNPQTAR	3	1	1	P14618		1507.87	2.5196e+08	266981974	2.57329e+08	0	0.000324	High	2.05623	High	1.89391	High	2.80288	1
	TATESFASDPILYRPVAVALDTKGPEIR	10	1	1	P14618		3017.61	7.96775e+08	7.61635e+08	8.93196e+08	0	0.001377	High	1.96992	High	4.15146	High	2.79543	1
	GFFKKGDVVIVLTGWRPGSGFTNTMR	2	1	1	P14618		2870.52	3.28218e+07	0	0	0	0.01567	High	1.8877			High	2.48195	2
	YRPRAPIIAVTRNPQTAR	3	1	1	P14618		2080.19	2.00114e+08	186606923	1.85682e+08	0	0.001556	High	1.07782	High	1.93956	High	2.98207	2
	YRPRAPIIAVTR	1	1	1	P14618		1412.85	0	0	110131388	0	0.0002611					High	2.42179	1
	GDLGIEIPAEKVFLAQK	4	1	1	P14618		1828.03	1.19444e+08	1.06647e+08	1.24983e+08	0.001	0.008801	High	1.52653	High	1.53633	High	1.65515	1
	QKGADFLVTEVENGGSLGSKK	1	1	1	P14618		2164.13	4.16326e+06	0	0	0.002	0.07411	High	1.90548					2
	IISKIENHEGVR	1	1	1	P14618		1394.78	0	3.64373e+07	0	0.002	0.05927			High	2.08021			1
	KGVNLPGAAVDLPAVSEK	1	1	1	P14618		1764.99	2.64661e+07	0	0	0.003	0.07889	High	2.45198					1
	SVETLKEMIK	2	1	1	P14618		1177.65	7.38271e+07	6.54576e+07	0	0.004	0.07873	High	2.30207	High	3.26318			1
P06576	ATP synthase subunit beta, mitochondrial OS=Homo sapiens OX=9606 GN=ATP5B PE=1 SV=3 - [ATPB_HUMAN]	48.2	1	21	21	83	334113437	3.31881e+08	3.01457e+08	66.708	41.59	18	32	72.4988	39.89	16	27	56.0879	28.17	13	24	529	56.5246	5.40186
	Sequence	# PSMs	# Proteins	# Protein Groups	Protein Group Accessions	Modifications	MH+ [Da]	A5: Area	B5: Area	C5: Area	q-Value	PEP	A2	XCorr A2	B2	XCorr B2	C2	XCorr C2	# Missed Cleavages
	TIAMDGTEGLVRGQK	3	1	1	P06576		1575.83	9.65092e+06	8.29248e+06	7.60407e+06	0	0.001785	High	4.60134	High	3.99891	High	3.7063	1
	LVLEVAQHLGESTVR	6	1	1	P06576		1650.92	7.6258e+07	6.97768e+07	7.14024e+07	0	8.812e-12	High	4.11923	High	4.32564	High	5.37165	0
	IMDPNIVGSEHYDVAR	6	1	1	P06576		1815.88	2.31233e+08	2.22735e+08	0	0	0.007041	High	4.10929	High	4.55745	High	3.58058	0
	AIAELGIYPAVDPLDSTSR	9	1	1	P06576		1988.04	94613512	7.77532e+07	7.84576e+07	0	0.0004108	High	3.88742	High	4.03193	High	4.07952	0
	VALVYGQMNEPPGAR	10	1	1	P06576		1601.82	1.80734e+07	1.70424e+07	1.9258e+07	0	0.002701	High	3.49551	High	4.60045	High	4.31724	0
	TIAMDGTEGLVR	3	1	1	P06576		1262.64	73139358	6.88402e+07	7.32503e+07	0	0.01397	High	3.40494	High	3.2048	High	2.89494	0
	GQKVLDSGAPIKIPVGPETLGR	7	1	1	P06576		2232.28	1.14385e+08	1.10624e+08	1.1684e+08	0	0.00993	High	3.25293	High	3.09535	High	2.08778	2
	VLDSGAPIKIPVGPETLGR	8	1	1	P06576		1919.11	390930361	3.75473e+08	3.72301e+08	0	2.011e-08	High	2.83561	High	3.03123	High	3.18045	1
	IMNVIGEPIDER	3	1	1	P06576		1385.71	2.30748e+07	2.07038e+07	1.83091e+07	0	0.0006054	High	2.77082	High	3.0837	High	3.16187	0
	AHGGYSVFAGVGER	3	1	1	P06576		1406.68	2.47638e+07	2.38681e+07	25392100	0	0.02042	High	2.41038	High	3.44093	High	2.98784	0
	IMDPNIVGSEHYDVARGVQK	2	1	1	P06576		2228.12	7.99942e+06	1.41667e+08	0	0	0.01451	High	2.31998	High	1.70802			1
	FLSQPFQVAEVFTGHMGK	6	1	1	P06576		2023.02	1.38003e+08	1.40977e+08	1.51368e+08	0	0.0002365	High	2.14571	High	2.14259	High	2.73769	0
	IMNVIGEPIDERGPIK	1	1	1	P06576		1780.97	39885933	0	0	0	0.0309	High	2.12325					1
	IMNVIGEPIDERGPIKTK	8	1	1	P06576		2010.11	3.80177e+08	3.97435e+08	3.80702e+08	0	0.0007908	High	2.09577	High	2.21932	High	2.21792	2
	KIQRFLSQPFQVAEVFTGHMGK	1	1	1	P06576		2548.35	9.767e+06	0	0	0	0.01846	High	1.96955					2
	EGNDLYHEMIESGVINLKDATSK	2	1	1	P06576		2563.24	1.64382e+07	1.6196e+07	0	0	0.02896	High	1.70956	High	1.77376			1
	FTQAGSEVSALLGRIPSAVGYQPTLATDMGTMQER	1	1	1	P06576		3682.82	0	3.11347e+07	0	0	0.0109			High	3.31935			1
	AIAELGIYPAVDPLDSTSRIMDPNIVGSEHYDVAR	1	1	1	P06576		3784.89	0	0	1.80778e+07	0	0.001619					High	1.71439	1
	KGSITSVQAIYVPADDLTDPAPATTFAHLDATTVLSR	1	1	1	P06576		3842.98	0	0	0	0.002	0.07246	High	1.19298					1
	ETRLVLEVAQHLGESTVR	1	1	1	P06576		2037.11	6.68608e+06	0	0	0.003	0.09603	High	1.97463					1
	DATSKVALVYGQMNEPPGAR	1	1	1	P06576		2104.05	0	6.36767e+06	0	0.005	0.1124			High	3.21497			1
Q71U36	Tubulin alpha-1A chain OS=Homo sapiens OX=9606 GN=TUBA1A PE=1 SV=1 - [TBA1A_HUMAN]	48.12	1	7	30	159	8.4436e+08	7.92563e+08	8.2148e+08	132.92	47.45	22	53	123.916	47.45	22	48	148.428	48.12	28	58	451	50.1036	5.05908
	Sequence	# PSMs	# Proteins	# Protein Groups	Protein Group Accessions	Modifications	MH+ [Da]	A5: Area	B5: Area	C5: Area	q-Value	PEP	A2	XCorr A2	B2	XCorr B2	C2	XCorr C2	# Missed Cleavages
	TIGGGDDSFNTFFSETGAGK	6	2	2	Q71U36;P68363		2007.9	2.76248e+07	23670465	2.85919e+07	0	8.753e-05	High	5.16598	High	5.00176	High	4.90022	0
	AVCMLSNTTAIAEAWAR	9	2	2	Q71U36;P68363	C3(Carbamidomethyl)	1864.91	108548134	104042896	114786608	0	7.712e-05	High	4.90198	High	5.33008	High	4.94196	0
	AYHEQLSVAEITNACFEPANQMVK	6	2	2	Q71U36;P68363	C15(Carbamidomethyl)	2750.29	1.26661e+08	1.05191e+08	1.14027e+08	0	0.003681	High	4.40217	High	4.8284	High	4.53042	0
	AVFVDLEPTVIDEVR	13	2	2	Q71U36;P68363		1701.91	4.64071e+08	3.84742e+08	3.8295e+08	0	0.002171	High	4.33195	High	3.40302	High	4.31261	0
	AVCMLSNTTAIAEAWAR	3	2	2	Q71U36;P68363	C3(Carbamidomethyl); M4(Oxidation)	1880.91	8142527	1.93101e+07	8.28852e+06	0	2.294e-06	High	4.1816	High	2.74412	High	4.56337	0
	TIQFVDWCPTGFK	6	1	1	Q71U36	C8(Carbamidomethyl)	1598.77	1.06856e+08	1.01505e+08	1.21133e+08	0	0.003772	High	3.86777	High	3.82534	High	3.57699	0
	AYHEQLSVAEITNACFEPANQMVK	4	2	2	Q71U36;P68363	C15(Carbamidomethyl); M22(Oxidation)	2766.3	7.48835e+06	7.61637e+06	5.38349e+06	0	2.723e-07	High	3.60764	High	4.28918	High	4.71411	0
	QLFHPEQLITGKEDAANNYAR	9	2	2	Q71U36;P68363		2415.21	1215057636	1.14246e+09	1.18645e+09	0	3.397e-06	High	3.5627	High	3.27666	High	3.61131	1
	DVNAAIATIKTK	3	2	2	Q71U36;P68363		1244.72	2.17007e+07	1.87114e+07	1.97579e+07	0	0.0005563	High	3.33769	High	2.4154	High	3.52339	1
	TIQFVDWCPTGFKVGINYQPPTVVPGGDLAK	4	1	1	Q71U36	C8(Carbamidomethyl)	3404.74	2.18056e+07	1.67938e+07	2.69039e+07	0	0.00384	High	3.21851	High	2.6342	High	2.22068	1
	VGINYQPPTVVPGGDLAK	6	2	2	Q71U36;P68363		1824.99	1.16641e+08	9.80211e+07	1.03474e+08	0	0.01223	High	3.16093	High	2.92193	High	1.80625	0
	IHFPLATYAPVISAEK	20	2	2	Q71U36;P68363		1756.97	379493792	3.64487e+08	4.3867e+08	0	2.644e-05	High	3.1264	High	3.62409	High	4.08162	0
	TGTYRQLFHPEQLITGKEDAANNYAR	9	2	2	Q71U36;P68363		2993.49	2.6286e+08	249631065	2.53576e+08	0	0.003472	High	2.97895	High	5.13399	High	3.84264	2
	DVNAAIATIK	1	1	1	Q71U36		1015.58	0	0	0	0	0.006946	High	2.93085					0
	LDHKFDLMYAKR	6	2	2	Q71U36;P68363		1536.8	1.15503e+08	1.1231e+08	110717241	0	0.001441	High	2.85692	High	2.926	High	2.2832	2
	LDHKFDLMYAK	4	2	2	Q71U36;P68363		1380.7	1.3687e+08	1.14958e+08	1.20865e+08	0	0.01616	High	2.55516	High	2.11737	High	2.34497	1
	VGINYQPPTVVPGGDLAKVQR	5	2	2	Q71U36;P68363		2208.22	1.02087e+08	9.98852e+07	9.81059e+07	0	0.02819	High	2.45826	High	2.68204	High	2.37168	1
	VQRAVCMLSNTTAIAEAWAR	6	2	2	Q71U36;P68363	C6(Carbamidomethyl)	2248.14	4.11288e+07	3.95106e+07	4.65517e+07	0	2.563e-05	High	2.44365	High	3.19524	High	3.69983	1
	YMACCLLYRGDVVPKDVNAAIATIK	4	2	2	Q71U36;P68363	C4(Carbamidomethyl); C5(Carbamidomethyl)	2841.46	1.04514e+08	1.07379e+08	1.28515e+08	0	0.001076	High	2.17971	High	1.22332	High	1.81566	2
	GHYTIGKEIIDLVLDRIR	5	2	2	Q71U36;P68363		2111.2	8.5416e+06	7.96615e+06	1.09072e+07	0	0.009805	High	2.0463	High	2.06154	High	1.96169	2
	AVFVDLEPTVIDEVRTGTYR	6	2	2	Q71U36;P68363		2280.2	697332294	626185294	6.7018e+08	0	8.614e-08	High	1.88765	High	2.2038	High	2.69759	1
	TIGGGDDSFNTFFSETGAGKHVPR	4	2	2	Q71U36;P68363		2497.18	6.20689e+08	6.0904e+08	6.07813e+08	0	0.0167	High	1.85744	High	1.81456	High	1.6705	1
	DVNAAIATIKTKR	6	2	2	Q71U36;P68363		1400.82	6.24171e+07	7.65663e+07	8.25637e+07	0	0.001956	High	1.60661	High	2.24496	High	2.308	2
	RTIQFVDWCPTGFK	2	1	1	Q71U36	C9(Carbamidomethyl)	1754.87	0	2.08482e+07	2.0881e+07	0	3.169e-05			High	2.87314	High	3.26856	1
	HGKYMACCLLYR	1	2	2	Q71U36;P68363	C7(Carbamidomethyl); C8(Carbamidomethyl)	1571.73	0	0	2.13236e+07	0	1.517e-06					High	2.95635	1
	TIQFVDWCPTGFKVGINYQPPTVVPGGDLAKVQR	2	1	1	Q71U36	C8(Carbamidomethyl)	3787.98	0	0	97361022	0	0.002038					High	2.59477	2
	IHFPLATYAPVISAEKAYHEQLSVAEITNACFEPANQMVK	2	2	2	Q71U36;P68363	C31(Carbamidomethyl)	4488.27	0	1.49684e+07	0	0.001	0.04741			High	2.06121	High	2.27344	1
	VQRAVCMLSNTTAIAEAWAR	1	2	2	Q71U36;P68363	C6(Carbamidomethyl); M7(Oxidation)	2264.13	0	0	3.13617e+06	0.001	0.00648					High	3.14017	1
	QLFHPEQLITGK	1	2	2	Q71U36;P68363		1410.78	0	0	3.55812e+07	0.001	0.003112					High	2.06295	0
	HGKYMACCLLYRGDVVPK	1	2	2	Q71U36;P68363	C7(Carbamidomethyl); C8(Carbamidomethyl)	2167.07	0	0	2.14682e+08	0.001	0.01122					High	1.36948	2
	YMACCLLYRGDVVPK	1	2	2	Q71U36;P68363	C4(Carbamidomethyl); C5(Carbamidomethyl)	1844.89	0	0	1.69299e+08	0.002	0.01424					High	2.1798	1
	LDHKFDLMYAKR	1	2	2	Q71U36;P68363	M8(Oxidation)	1552.8	0	0	1.83386e+07	0.002	0.01297					High	1.48332	2
[truncated: 3,893 more rows]

## Sheet: EP3
Accession	Description	ΣCoverage	Σ# Proteins	Σ# Unique Peptides	Σ# Peptides	Σ# PSMs	A5: Area	B5: Area	C5: Area	Score A2	Coverage A2	# Peptides A2	# PSM A2	Score B2	Coverage B2	# Peptides B2	# PSM B2	Score C2	Coverage C2	# Peptides C2	# PSM C2	# AAs	MW [kDa]	calc. pI
[truncated: 8,284 more rows]

[truncated: 9 more sheets: EP4, EP5, EP6, EP7, EP8, EP9, EP10, EP11, EP12]
