# Supplementary material for: Ependymoma Pediatric Brain Tumor Protein Fingerprinting by Integrated Mass Spectrometry Platforms: A Pilot Investigation
Source: Cancers (Basel). 2020 Mar 13;12(3):674. doi: 10.3390/cancers12030674 (PMC7140025; doi:10.3390/cancers12030674)
Supplement: Supplementary file 1 [file cancers-12-00674-s001.zip › Table S3.xlsx]

## Sheet: A
	Lists of the Uniprot Accessions of the protein elements identified per analyzed sample by shotgun proteomic analysis
	PF Ependymomas										ST Ependymomas
	EP1	EP5	EP2	EP3	EP6	EP7	EP8	EP9	EP11	EP12	EP4	EP10
	A6NCE7	A0A0A0MRZ8	A6NEC2	O00264	O00161	A0A075B6K5	A0AVT1	A0A0A0MRZ8	A0A0A0MRZ8	A0A0A0MRZ8	A6NGU5	A0MZ66
	A6NIH7	O00161	A6NIZ1	O00299	O00231	A0A075B6S2	A1L0T0	A0A0B4J1V1	A0A0B4J2H0	A0A0C4DH38	O00115	A1L0T0
	O00139	O00264	O00151	O00410	O00264	A0A087WXM9	A6NHR9	A0A0B4J2H0	A0A0C4DH31	A8MVU1	O00151	A6NDB9
	O00161	O00299	O00168	O00468	O00299	A0A1B0GUS0	F8WCM5	A0A0C4DH38	A0A0C4DH38	O00151	O00161	O00154
	O00193	O00468	O00264	O14594	O00410	A0A1B0GUW7	O00139	O00161	A0AVT1	O00161	O00217	O00161
	O00217	O14594	O00299	O14602	O00461	A1L0T0	O00161	O00231	C8XPA8	O00231	O00231	O00193
	O00264	O14602	O00451	O14672	O00468	A2PYH4	O00186	O00232	E9PAV3	O00264	O00232	O00217
	O00299	O14745	O00461	O14745	O00764	A2RUB6	O00193	O00264	O00151	O00299	O00233	O00231
	O00461	O14773	O00468	O14773	O14594	A2VCL2	O00217	O00299	O00161	O00303	O00244	O00264
	O00468	O14818	O14594	O14818	O14602	A3KMH1	O00231	O00410	O00217	O00410	O00264	O00299
	O00506	O14880	O14672	O14880	O14672	A4UGR9	O00232	O00468	O00232	O00429	O00299	O00410
	O14745	O14979	O14979	O14907	O14745	A4ZCW2	O00233	O00499	O00244	O00451	O00303	O00451
	O14773	O15061	O15031	O14979	O14818	A4ZCW5	O00244	O00560	O00264	O00468	O00410	O00461
	O14818	O15075	O15061	O15061	O14907	A5YKK6	O00264	O00567	O00299	O00534	O00451	O00468
	O14880	O15143	O15075	O15075	O14979	A6NCE7	O00299	O00764	O00303	O00560	O00468	O00567
	O14979	O15144	O15355	O15144	O14980	A6NE01	O00410	O14594	O00410	O00764	O00470	O00571
	O14981	O15173	O15400	O15145	O15061	A6NHR9	O00429	O14602	O00429	O14579	O00499	O00629
	O15061	O15258	O15540	O15173	O15075	A6NI56	O00451	O14672	O00451	O14594	O00560	O00757
	O15126	O15347	O43175	O15347	O15144	A6NKN8	O00468	O14744	O00461	O14602	O00567	O14531
	O15144	O15400	O43390	O15400	O15173	A6NMX2	O00499	O14745	O00468	O14672	O00764	O14561
	O15173	O15511	O43491	O15511	O15347	A6NNM3	O00505	O14773	O00534	O14745	O14602	O14562
	O15347	O43169	O43707	O15540	O15400	A6QL64	O00534	O14818	O00560	O14773	O14653	O14594
	O15400	O43175	O43765	O43169	O15484	A7J3A2	O00567	O14880	O00567	O14818	O14744	O14602
	O15540	O43390	O60506	O43175	O15511	A8K2U0	O00571	O14907	O00571	O14907	O14745	O14662
	O43143	O43488	O60664	O43237	O15540	A8MWX3	O00629	O14979	O00584	O14979	O14773	O14737
	O43169	O43657	O75056	O43242	O43143	B1NKT8	O00754	O14980	O00629	O15061	O14776	O14744
	O43175	O43681	O75367	O43390	O43175	B2RD01	O00764	O15031	O00764	O15075	O14787	O14745
	O43290	O43707	O75369	O43488	O43242	B3SRX6	O14561	O15061	O14531	O15143	O14818	O14773
	O43390	O43776	O75475	O43491	O43390	B7Z1M9	O14579	O15075	O14548	O15144	O14907	O14776
	O43488	O43852	O75487	O43598	O43396	C5H431	O14602	O15126	O14561	O15145	O14964	O14818
	O43491	O43854	O75494	O43633	O43488	D7RF80	O14617	O15143	O14594	O15162	O14974	O14828
	O43598	O60506	O75531	O43681	O43491	E5RHQ5	O14618	O15144	O14617	O15173	O14979	O14880
	O43657	O60664	O75891	O43707	O43598	E9PAV3	O14653	O15145	O14639	O15347	O14980	O14907
	O43681	O60749	O75947	O43765	O43657	F5HG51	O14672	O15173	O14672	O15400	O15031	O14979
	O43684	O60814	O94760	O43776	O43681	H7BZ55	O14737	O15347	O14737	O15484	O15061	O14980
	O43707	O60831	O94811	O43852	O43707	O00139	O14744	O15355	O14744	O15511	O15075	O15031
	O43776	O75083	O94819	O60437	O43765	O00160	O14745	O15400	O14745	O43169	O15144	O15126
	O43852	O75131	O94905	O60664	O43776	O00161	O14773	O15484	O14773	O43175	O15145	O15144
	O43865	O75340	O95218	O60716	O43852	O00168	O14776	O15511	O14818	O43181	O15173	O15145
	O60506	O75367	O95865	O60749	O43865	O00217	O14787	O15540	O14880	O43242	O15347	O15173
	O60664	O75368	P00367	O60814	O60506	O00231	O14818	O43143	O14907	O43324	O15355	O15231
	O60784	O75369	P00387	O60831	O60664	O00233	O14879	O43169	O14979	O43390	O15400	O15347
	O60831	O75390	P00450	O75083	O60749	O00264	O14880	O43175	O14980	O43396	O15511	O15355
	O60888	O75475	P00558	O75131	O60814	O00273	O14936	O43237	O15031	O43399	O15540	O15400
	O75083	O75489	P00568	O75340	O75056	O00299	O14964	O43242	O15061	O43488	O43143	O15511
	O75340	O75494	P00734	O75367	O75083	O00303	O14974	O43290	O15075	O43491	O43169	O15540
	O75347	O75531	P00738	O75368	O75131	O00401	O14979	O43324	O15143	O43583	O43175	O43143
	O75367	O75643	P00915	O75369	O75340	O00410	O14980	O43390	O15144	O43598	O43181	O43169
	O75369	O75891	P00918	O75381	O75347	O00451	O15061	O43396	O15162	O43633	O43236	O43172
	O75396	O75915	P01023	O75390	O75367	O00461	O15075	O43399	O15173	O43657	O43237	O43175
	O75400	O75947	P01024	O75475	O75368	O00468	O15126	O43488	O15347	O43681	O43242	O43181
	O75475	O75955	P01034	O75489	O75390	O00479	O15143	O43491	O15355	O43707	O43290	O43237
	O75489	O75964	P01116	O75494	O75436	O00483	O15144	O43504	O15400	O43747	O43324	O43242
	O75494	O94760	P01834	O75531	O75475	O00534	O15145	O43583	O15484	O43765	O43347	O43290
	O75531	O94905	P01857	O75781	O75487	O00560	O15173	O43598	O15511	O43776	O43390	O43347
	O75533	O95292	P01860	O75874	O75489	O00567	O15347	O43681	O15533	O43809	O43396	O43390
	O75602	O95336	P01871	O75891	O75494	O00571	O15355	O43684	O15540	O43852	O43399	O43396
	O75643	O95741	P02042	O75947	O75531	O00592	O15400	O43707	O43143	O43865	O43488	O43399
	O75781	O95810	P02533	O75964	O75643	O00748	O15484	O43765	O43169	O60234	O43491	O43488
	O75886	O95831	P02545	O76041	O75695	O00763	O15511	O43776	O43175	O60506	O43583	O43491
	O75915	O95865	P02647	O76054	O75781	O14497	O15523	O43852	O43181	O60613	O43598	O43493
	O75947	P00167	P02649	O94760	O75874	O14531	O43143	O43865	O43237	O60664	O43633	O43583
	O75964	P00338	P02656	O94772	O75891	O14561	O43148	O60493	O43242	O60749	O43681	O43598
	O76041	P00367	P02768	O94811	O75915	O14578	O43169	O60506	O43290	O60814	O43707	O43633
	O94760	P00387	P02786	O94856	O75947	O14594	O43175	O60664	O43347	O60831	O43765	O43681
	O94811	P00403	P02787	O94905	O75964	O14602	O43181	O60749	O43390	O60888	O43776	O43684
	O94819	P00441	P02790	O94919	O94760	O14646	O43237	O60763	O43396	O75083	O43809	O43707
	O94856	P00450	P02795	O95202	O94772	O14653	O43242	O60814	O43399	O75131	O43813	O43752
	O94874	P00491	P04003	O95336	O94856	O14686	O43290	O60828	O43488	O75340	O43852	O43765
	O94901	P00505	P04004	O95741	O94905	O14744	O43324	O60831	O43491	O75367	O43865	O43776
	O94905	P00558	P04040	O95865	O95202	O14745	O43347	O60888	O43493	O75368	O43924	O43809
	O95183	P00568	P04075	P00167	O95292	O14776	O43390	O75056	O43504	O75390	O60216	O43852
	O95197	P00734	P04083	P00338	O95336	O14880	O43395	O75083	O43583	O75436	O60256	O43865
	O95202	P00736	P04156	P00367	O95741	O14907	O43396	O75131	O43598	O75475	O60506	O60216
	O95232	P00738	P04264	P00387	O95777	O14957	O43399	O75340	O43617	O75489	O60664	O60264
	O95292	P00742	P04406	P00403	O95817	O14974	O43488	O75347	O43657	O75494	O60716	O60341
	O95336	P00747	P04733	P00441	O95865	O14979	O43491	O75367	O43681	O75531	O60749	O60506
	O95741	P00748	P04843	P00450	P00338	O14980	O43493	O75368	O43707	O75594	O60784	O60664
	O95834	P00751	P04899	P00491	P00367	O15061	O43504	O75369	O43747	O75781	O60814	O60716
	O95865	P00915	P04908	P00505	P00387	O15075	O43583	O75436	O43752	O75832	O60828	O60749
	O96019	P00918	P05023	P00558	P00390	O15085	O43598	O75475	O43765	O75874	O60831	O60784
	P00167	P01008	P05026	P00568	P00441	O15131	O43615	O75487	O43776	O75891	O60884	O60828
	P00338	P01009	P05090	P00734	P00450	O15143	O43633	O75489	O43809	O75915	O60888	O60831
	P00387	P01011	P05091	P00738	P00491	O15144	O43657	O75494	O43852	O75947	O75083	O60832
	P00403	P01019	P05106	P00747	P00558	O15145	O43681	O75531	O43854	O75955	O75122	O75083
	P00441	P01023	P05198	P00751	P00568	O15160	O43684	O75533	O43866	O75964	O75131	O75122
	P00450	P01024	P05386	P00915	P00734	O15173	O43707	O75643	O43924	O76003	O75340	O75340
	P00491	P01031	P05388	P00918	P00738	O15182	O43765	O75781	O60216	O92531	O75347	O75347
	P00505	P01042	P05556	P01008	P00915	O15230	O43776	O75874	O60256	O94760	O75367	O75367
	P00558	P01591	P06396	P01009	P00966	O15254	O43809	O75891	O60264	O94772	O75368	O75368
	P00568	P01700	P06576	P01011	P01008	O15260	O43852	O75915	O60499	O94811	O75369	O75379
	P00734	P01834	P06733	P01019	P01009	O15400	O43865	O75937	O60506	O94903	O75396	O75390
	P00738	P01857	P06744	P01023	P01011	O15511	O60216	O75947	O60664	O94905	O75475	O75396
	P00747	P01859	P06748	P01024	P01019	O15533	O60264	O75955	O60716	O94973	O75489	O75400
	P00751	P01860	P06753	P01031	P01023	O15540	O60282	O75964	O60739	O95202	O75494	O75475
	P00915	P01861	P07195	P01033	P01024	O43143	O60443	O76054	O60749	O95336	O75531	O75487
	P00918	P01871	P07237	P01042	P01034	O43150	O60493	O94760	O60763	O95498	O75533	O75489
	P01008	P01876	P07355	P01112	P01042	O43169	O60506	O94772	O60814	O95741	O75608	O75494
	P01009	P01877	P07437	P01116	P01111	O43175	O60613	O94811	O60828	O95777	O75643	O75531
	P01011	P01903	P07451	P01619	P01112	O43324	O60637	O94856	O60831	O95782	O75781	O75533
	P01019	P02042	P07900	P01834	P01834	O43390	O60664	O94903	O60841	O95817	O75822	O75569
	P01023	P02452	P07910	P01857	P01857	O43396	O60716	O94905	O60884	O95865	O75828	O75643
	P01024	P02462	P07954	P01860	P01871	O43414	O60739	O94906	O60941	O96000	O75874	O75781
	P01112	P02511	P08133	P01871	P02042	O43424	O60749	O94973	O75015	P00167	O75884	O75874
	P01116	P02533	P08195	P01876	P02533	O43488	O60762	O95197	O75083	P00338	O75886	O75886
	P01834	P02538	P08238	P01903	P02545	O43491	O60763	O95232	O75131	P00367	O75891	O75915
	P01857	P02545	P08621	P02042	P02647	O43583	O60784	O95292	O75340	P00387	O75915	O75940
	P01871	P02549	P08670	P02511	P02649	O43598	O60814	O95336	O75347	P00403	O75937	O75947
	P01876	P02647	P08708	P02533	P02652	O43617	O60828	O95373	O75367	P00441	O75940	O75955
	P02042	P02649	P08754	P02545	P02654	O43657	O60831	O95433	O75368	P00450	O75947	O75964
	P02533	P02652	P08758	P02549	P02675	O43681	O60832	O95741	O75369	P00491	O75964	O76070
	P02545	P02654	P08865	P02647	P02679	O43707	O60841	O95777	O75380	P00492	O76041	O94760
	P02647	P02671	P09211	P02649	P02748	O43736	O75056	O95782	O75381	P00558	O76054	O94772
	P02649	P02675	P09382	P02652	P02749	O43765	O75083	O95817	O75390	P00568	O76094	O94776
	P02652	P02679	P09429	P02654	P02751	O43776	O75131	O95865	O75396	P00734	O94760	O94811
	P02654	P02730	P09455	P02656	P02763	O43809	O75340	O96019	O75400	P00736	O94772	O94888
	P02671	P02743	P09471	P02671	P02765	O43815	O75347	P00167	O75436	P00738	O94811	O94903
	P02675	P02746	P09525	P02675	P02766	O43852	O75351	P00338	O75475	P00739	O94819	O94905
	P02679	P02747	P09651	P02679	P02768	O43861	O75367	P00367	O75489	P00742	O94903	O94906
	P02730	P02748	P09874	P02724	P02774	O43934	O75368	P00387	O75494	P00747	O94905	O94973
	P02748	P02749	P09936	P02730	P02787	O60216	O75369	P00403	O75531	P00751	O94906	O95196
	P02749	P02751	P09972	P02743	P02790	O60237	O75381	P00441	O75533	P00915	O95202	O95202
	P02751	P02753	P0C0L4	P02748	P02792	O60299	O75390	P00450	O75643	P00918	O95218	O95218
	P02763	P02760	P0DMV8	P02749	P04003	O60306	O75400	P00491	O75695	P00966	O95232	O95232
	P02765	P02763	P0DOY2	P02751	P04004	O60308	O75436	P00558	O75781	P01008	O95292	O95249
	P02768	P02765	P10412	P02760	P04075	O60346	O75475	P00568	O75822	P01009	O95336	O95292
	P02776	P02766	P10636	P02763	P04080	O60422	O75487	P00734	O75832	P01011	O95400	O95336
	P02787	P02768	P10768	P02765	P04083	O60506	O75489	P00736	O75874	P01019	O95571	O95400
	P02788	P02774	P10809	P02766	P04179	O60518	O75494	P00738	O75891	P01023	O95777	O95563
	P02790	P02775	P10909	P02768	P04196	O60613	O75506	P00739	O75915	P01024	O95782	O95777
	P02792	P02776	P11021	P02774	P04216	O60641	O75521	P00747	O75934	P01031	O95817	O95817
	P02794	P02786	P11137	P02776	P04217	O60664	O75531	P00751	O75937	P01033	O95819	O95865
	P04003	P02787	P11142	P02787	P04259	O60716	O75533	P00915	O75940	P01042	O95825	O96000
	P04004	P02788	P11233	P02788	P04264	O60721	O75534	P00918	O75947	P01111	O95865	O96019
	P04040	P02790	P11279	P02790	P04271	O60749	O75602	P01008	O75955	P01112	O96000	P00167
	P04075	P02792	P11586	P02792	P04350	O60762	O75643	P01009	O75964	P01594	P00167	P00338
	P04080	P02794	P11766	P02794	P04406	O60784	O75688	P01011	O76003	P01619	P00338	P00367
	P04083	P04003	P12109	P02795	P04632	O60831	O75781	P01019	O76041	P01624	P00352	P00387
	P04196	P04004	P12277	P04003	P04792	O75064	O75822	P01023	O76094	P01699	P00367	P00390
	P04259	P04040	P12814	P04004	P04843	O75069	O75832	P01024	O94760	P01700	P00387	P00403
	P04264	P04075	P12956	P04040	P04899	O75083	O75886	P01031	O94772	P01764	P00390	P00441
	P04271	P04080	P13010	P04075	P04908	O75096	O75915	P01033	O94811	P01834	P00441	P00450
	P04350	P04083	P13073	P04080	P05023	O75112	O75936	P01042	O94903	P01857	P00450	P00491
	P04406	P04114	P13489	P04083	P05026	O75116	O75937	P01111	O94905	P01859	P00491	P00533
	P04439	P04179	P13591	P04114	P05091	O75122	O75940	P01112	O94973	P01860	P00505	P00558
	P04632	P04196	P13611	P04179	P05155	O75131	O75947	P01591	O94979	P01871	P00558	P00568
	P04792	P04216	P13639	P04196	P05156	O75179	O75955	P01615	O95202	P01876	P00568	P00734
	P04843	P04217	P13645	P04216	P05198	O75306	O75964	P01619	O95232	P01903	P00734	P00738
	P04899	P04259	P13647	P04217	P05386	O75340	O76041	P01624	O95292	P01920	P00738	P00751
	P04908	P04264	P13667	P04233	P05387	O75343	O76094	P01700	O95336	P02042	P00915	P00915
	P05023	P04271	P13726	P04259	P05388	O75344	O94760	P01703	O95373	P02462	P00918	P00918
	P05026	P04406	P13987	P04264	P05455	O75367	O94772	P01764	O95433	P02511	P01008	P01008
	P05091	P04439	P14136	P04271	P05556	O75368	O94811	P01782	O95741	P02533	P01009	P01009
	P05106	P04632	P14209	P04350	P06396	O75369	O94856	P01834	O95777	P02545	P01011	P01011
	P05107	P04792	P14314	P04406	P06576	O75390	O94874	P01857	O95782	P02647	P01019	P01019
	P05109	P04839	P14415	P04632	P06702	O75396	O94903	P01859	O95817	P02649	P01023	P01023
	P05198	P04843	P14618	P04792	P06727	O75400	O94905	P01860	O95864	P02652	P01024	P01024
	P05386	P04844	P14625	P04843	P06733	O75419	O94906	P01861	O95865	P02654	P01034	P01042
	P05387	P04899	P14866	P04899	P06744	O75445	O94919	P01871	O95881	P02671	P01042	P01112
	P05388	P05023	P15104	P05023	P06748	O75475	O94979	P01876	O96019	P02675	P01111	P01116
	P05455	P05026	P15259	P05026	P06753	O75489	O95139	P01903	P00167	P02679	P01112	P01834
	P05556	P05067	P15311	P05091	P06756	O75494	O95183	P01920	P00338	P02730	P01619	P01857
	P06396	P05106	P15328	P05106	P06899	O75531	O95202	P02008	P00367	P02743	P01834	P01860
	P06576	P05107	P15531	P05107	P07195	O75533	O95218	P02042	P00387	P02748	P01857	P01861
	P06702	P05109	P15880	P05109	P07237	O75602	O95232	P02462	P00403	P02749	P01859	P01871
	P06727	P05141	P16070	P05155	P07305	O75629	O95292	P02533	P00441	P02750	P01860	P01876
	P06733	P05155	P16144	P05164	P07339	O75643	O95295	P02545	P00450	P02751	P01861	P02042
	P06744	P05156	P16152	P05198	P07355	O75665	O95336	P02549	P00491	P02753	P01871	P02462
	P06748	P05160	P16401	P05362	P07384	O75676	O95373	P02647	P00505	P02760	P01876	P02533
	P06753	P05164	P16615	P05386	P07437	O75695	O95400	P02649	P00533	P02763	P01903	P02545
	P07099	P05198	P17302	P05387	P07602	O75762	O95433	P02652	P00558	P02765	P02042	P02647
	P07195	P05362	P17568	P05388	P07737	O75781	O95757	P02654	P00568	P02766	P02511	P02649
	P07237	P05386	P17858	P05455	P07741	O75830	O95777	P02656	P00734	P02768	P02533	P02652
	P07305	P05387	P17980	P05556	P07900	O75874	O95782	P02671	P00736	P02774	P02545	P02654
	P07339	P05388	P18124	P06396	P07910	O75891	O95817	P02675	P00738	P02776	P02647	P02671
	P07355	P05455	P18669	P06576	P08133	O75899	O95865	P02679	P00747	P02787	P02649	P02675
	P07437	P05546	P19022	P06702	P08134	O75915	O96000	P02724	P00748	P02788	P02654	P02679
	P07602	P05556	P19105	P06727	P08195	O75923	O96019	P02730	P00751	P02790	P02671	P02686
	P07737	P06396	P19338	P06733	P08237	O75935	P00167	P02743	P00915	P02792	P02675	P02724
	P07741	P06576	P20020	P06744	P08238	O75947	P00338	P02746	P00918	P02794	P02679	P02743
	P07858	P06681	P20700	P06748	P08571	O75955	P00352	P02747	P01008	P04003	P02749	P02749
	P07900	P06702	P21291	P06753	P08621	O75964	P00367	P02748	P01009	P04004	P02763	P02751
	P07910	P06727	P21333	P06756	P08670	O75970	P00387	P02749	P01011	P04040	P02765	P02763
	P07951	P06733	P21796	P06899	P08708	O75976	P00390	P02750	P01019	P04075	P02766	P02765
	P07954	P06744	P21926	P07099	P08754	O76041	P00403	P02751	P01023	P04080	P02768	P02766
	P08133	P06748	P22087	P07108	P08758	O90370	P00441	P02760	P01024	P04083	P02774	P02768
	P08134	P06753	P22234	P07195	P08865	O94760	P00450	P02763	P01031	P04114	P02787	P02774
	P08195	P07093	P22314	P07237	P09104	O94772	P00491	P02765	P01033	P04179	P02788	P02786
	P08237	P07099	P22626	P07305	P09211	O94804	P00492	P02766	P01042	P04196	P02790	P02787
	P08238	P07195	P22695	P07339	P09382	O94811	P00505	P02768	P01112	P04216	P02792	P02788
	P08294	P07225	P22748	P07355	P09417	O94822	P00558	P02774	P01116	P04217	P02794	P02790
	P08311	P07237	P23229	P07384	P09429	O94826	P00568	P02786	P01594	P04233	P04004	P02792
	P08571	P07305	P23246	P07437	P09455	O94827	P00734	P02787	P01615	P04259	P04040	P02794
	P08574	P07311	P23284	P07451	P09471	O94874	P00738	P02788	P01619	P04264	P04075	P04003
	P08603	P07339	P23471	P07602	P09486	O94876	P00751	P02790	P01624	P04271	P04080	P04004
	P08621	P07355	P23527	P07711	P09525	O94889	P00915	P02792	P01700	P04406	P04083	P04040
	P08670	P07357	P23528	P07737	P09543	O94905	P00918	P02794	P01768	P04440	P04156	P04075
	P08708	P07358	P23634	P07741	P09622	O94906	P00966	P04003	P01834	P04632	P04179	P04080
	P08758	P07359	P24534	P07858	P09651	O94973	P01008	P04004	P01857	P04792	P04196	P04083
	P08865	P07360	P24821	P07900	P09874	O94979	P01009	P04040	P01859	P04839	P04216	P04179
	P09104	P07384	P25705	P07910	P09936	O94985	P01011	P04062	P01860	P04843	P04217	P04196
	P09211	P07437	P26038	P07954	P09960	O94988	P01019	P04075	P01871	P04844	P04229	P04216
	P09382	P07585	P26232	P07996	P09972	O95159	P01023	P04080	P01876	P04899	P04264	P04217
	P09429	P07602	P26641	P08133	P0C0L5	O95183	P01024	P04083	P01889	P04921	P04271	P04259
	P09455	P07711	P27338	P08134	P0C0S5	O95197	P01042	P04114	P01903	P05023	P04350	P04264
	P09471	P07737	P27348	P08195	P0DMV8	O95202	P01112	P04156	P01911	P05026	P04406	P04271
	P09486	P07741	P27361	P08237	P0DN79	O95222	P01834	P04179	P02042	P05091	P04632	P04350
	P09493	P07858	P27544	P08238	P0DOY2	O95232	P01857	P04196	P02452	P05106	P04792	P04406
	P09525	P07900	P27635	P08246	P10155	O95292	P01859	P04216	P02462	P05107	P04843	P04632
	P09622	P07910	P27695	P08294	P10599	O95336	P01876	P04217	P02511	P05109	P04844	P04792
	P09651	P07942	P27797	P08311	P10620	O95342	P01903	P04229	P02545	P05155	P04899	P04843
	P09874	P07951	P27816	P08571	P10768	O95359	P02042	P04233	P02647	P05156	P04908	P04844
	P09936	P07996	P27824	P08603	P10809	O95433	P02452	P04259	P02649	P05164	P05023	P04899
	P09972	P08123	P28482	P08670	P10909	O95487	P02511	P04264	P02652	P05186	P05026	P04908
	P0C0L4	P08133	P29218	P08697	P10915	O95563	P02545	P04271	P02671	P05198	P05060	P05023
	P0C0S5	P08134	P29401	P08708	P11021	O95573	P02647	P04350	P02675	P05362	P05067	P05026
	P0DMV8	P08195	P29692	P08754	P11142	O95747	P02649	P04406	P02679	P05386	P05090	P05067
	P0DN76	P08238	P29966	P08758	P11216	O95777	P02652	P04440	P02686	P05387	P05091	P05091
	P0DOY2	P08246	P29972	P08865	P11217	O95782	P02654	P04632	P02730	P05388	P05109	P05107
	P10155	P08311	P30038	P09104	P11233	O95785	P02671	P04792	P02748	P05455	P05155	P05155
	P10412	P08514	P30040	P09211	P11279	O95817	P02675	P04843	P02749	P05546	P05164	P05198
	P10599	P08567	P30041	P09382	P11586	O95834	P02679	P04844	P02751	P05556	P05204	P05204
	P10620	P08571	P30086	P09429	P11766	O95865	P02749	P04899	P02760	P06396	P05230	P05386
	P10768	P08572	P30101	P09455	P11908	O95881	P02753	P04908	P02763	P06576	P05386	P05387
	P10809	P08575	P30153	P09471	P12004	O95948	P02763	P05023	P02765	P06702	P05387	P05388
	P10909	P08603	P30485	P09493	P12109	O95994	P02765	P05026	P02766	P06727	P05388	P05452
	P11021	P08621	P30626	P09525	P12111	O96000	P02766	P05067	P02768	P06733	P05455	P05455
	P11142	P08670	P31946	P09543	P12236	O96008	P02768	P05091	P02774	P06737	P05556	P05556
	P11177	P08697	P31948	P09622	P12277	O96019	P02774	P05106	P02775	P06744	P06396	P06396
	P11216	P08708	P32119	P09651	P12814	P00167	P02787	P05107	P02776	P06748	P06454	P06576
	P11217	P08758	P33176	P09874	P12956	P00338	P02788	P05109	P02786	P06753	P06576	P06702
	P11233	P08779	P34932	P09936	P13010	P00352	P02790	P05155	P02787	P06756	P06702	P06727
	P11279	P08865	P35052	P09960	P13073	P00367	P02792	P05156	P02788	P06899	P06727	P06733
	P11387	P09104	P35221	P09972	P13489	P00387	P02794	P05164	P02790	P07195	P06730	P06744
	P11586	P09211	P35222	P0C0L5	P13591	P00390	P04004	P05198	P02792	P07203	P06733	P06748
	P11940	P09382	P35232	P0C0S5	P13611	P00403	P04040	P05204	P02794	P07225	P06744	P06753
	P12004	P09429	P35241	P0DMV8	P13639	P00441	P04062	P05362	P02795	P07237	P06748	P07195
	P12109	P09455	P35268	P0DOY2	P13645	P00450	P04075	P05386	P04003	P07305	P06753	P07203
	P12111	P09471	P35527	P10155	P13647	P00488	P04080	P05387	P04004	P07339	P06756	P07237
	P12236	P09486	P35555	P10451	P13667	P00492	P04083	P05388	P04040	P07355	P06899	P07305
	P12270	P09488	P35579	P10599	P13693	P00505	P04179	P05455	P04062	P07384	P07093	P07339
	P12277	P09493	P35611	P10620	P13726	P00558	P04196	P05543	P04075	P07437	P07099	P07355
	P12956	P09525	P35613	P10768	P13804	P00568	P04216	P05546	P04080	P07451	P07108	P07437
	P13010	P09651	P35637	P10809	P13987	P00734	P04217	P05556	P04083	P07602	P07195	P07602
	P13073	P09871	P35659	P10909	P14136	P00738	P04233	P06312	P04114	P07686	P07203	P07737
	P13489	P09874	P35908	P11021	P14314	P00747	P04259	P06331	P04179	P07711	P07237	P07741
	P13591	P09936	P36578	P11047	P14324	P00751	P04264	P06396	P04196	P07737	P07305	P07814
	P13639	P09960	P37802	P11142	P14415	P00846	P04271	P06576	P04216	P07741	P07311	P07900
	P13645	P0C0L5	P37837	P11166	P14550	P00915	P04350	P06681	P04217	P07858	P07339	P07910
	P13647	P0C0S5	P38606	P11171	P14618	P00918	P04406	P06702	P04233	P07900	P07355	P07948
	P13667	P0DMV8	P38646	P11216	P14625	P00966	P04632	P06727	P04259	P07910	P07384	P07954
	P13693	P0DOX7	P39019	P11217	P14866	P01008	P04792	P06733	P04264	P07954	P07437	P08133
	P13804	P0DOY2	P39023	P11233	P14868	P01009	P04843	P06737	P04271	P07996	P07602	P08134
	P13929	P0DP23	P39656	P11279	P14927	P01011	P04844	P06744	P04275	P08133	P07737	P08195
	P13987	P10124	P39687	P11586	P15121	P01019	P04899	P06748	P04406	P08185	P07741	P08237
	P14136	P10451	P40227	P11766	P15259	P01023	P04908	P06753	P04432	P08195	P07858	P08238
	P14314	P10599	P40855	P11908	P15311	P01024	P05023	P06756	P04632	P08238	P07900	P08559
	P14406	P10620	P40925	P11940	P15374	P01031	P05026	P06899	P04792	P08246	P07910	P08572
	P14415	P10643	P40926	P12109	P15531	P01042	P05090	P07108	P04843	P08311	P07919	P08603
	P14618	P10768	P42167	P12110	P15880	P01111	P05091	P07195	P04844	P08571	P07954	P08621
	P14625	P10809	P43003	P12111	P16070	P01619	P05107	P07203	P04899	P08572	P08133	P08670
	P14866	P10909	P43243	P12236	P16104	P01834	P05109	P07237	P04908	P08574	P08195	P08708
	P14868	P10915	P45973	P12270	P16144	P01859	P05155	P07305	P05023	P08575	P08237	P08758
	P14927	P11021	P45974	P12277	P16152	P01860	P05156	P07339	P05026	P08603	P08238	P08865
	P15259	P11047	P46776	P12814	P16188	P01871	P05198	P07355	P05067	P08648	P08246	P09012
	P15311	P11142	P46777	P12956	P16401	P01876	P05362	P07358	P05091	P08670	P08579	P09104
	P15328	P11166	P46821	P13010	P16403	P01903	P05386	P07384	P05106	P08697	P08621	P09132
	P15880	P11169	P47755	P13073	P16671	P01911	P05387	P07437	P05107	P08708	P08670	P09211
	P16070	P11215	P47756	P13473	P17301	P02042	P05388	P07451	P05109	P08758	P08708	P09382
	P16152	P11216	P48047	P13489	P17302	P02452	P05455	P07602	P05114	P08865	P08754	P09417
	P16401	P11233	P48507	P13591	P17655	P02458	P05556	P07711	P05155	P09104	P08758	P09429
	P16671	P11277	P48509	P13611	P17844	P02533	P06396	P07737	P05156	P09110	P08865	P09455
	P17302	P11279	P48668	P13639	P17858	P02545	P06576	P07738	P05164	P09132	P09012	P09471
	P17480	P11586	P48681	P13645	P17931	P02549	P06702	P07741	P05198	P09211	P09104	P09486
	P17655	P11766	P49006	P13647	P17980	P02647	P06727	P07858	P05204	P09382	P09110	P09488
	P17844	P11908	P49189	P13667	P17987	P02649	P06730	P07900	P05362	P09429	P09132	P09493
	P17858	P11940	P49327	P13693	P18124	P02652	P06733	P07910	P05386	P09455	P09211	P09525
	P17980	P12004	P49368	P13716	P18206	P02654	P06744	P07954	P05387	P09471	P09382	P09543
	P17987	P12109	P49419	P13804	P18669	P02656	P06748	P08133	P05388	P09486	P09417	P09622
	P18124	P12110	P49792	P13987	P19022	P02671	P06753	P08195	P05455	P09493	P09429	P09651
	P18206	P12111	P50395	P14136	P19105	P02675	P06899	P08237	P05556	P09525	P09455	P09661
	P18583	P12236	P50402	P14174	P19338	P02679	P07195	P08238	P06396	P09651	P09471	P09874
	P18669	P12259	P50454	P14209	P19367	P02730	P07203	P08246	P06576	P09661	P09486	P09936
	P18859	P12270	P50502	P14314	P19652	P02743	P07237	P08311	P06702	P09871	P09493	P09960
	P19022	P12277	P50897	P14415	P19823	P02746	P07311	P08571	P06727	P09874	P09497	P09972
	P19105	P12429	P50990	P14543	P19827	P02747	P07339	P08572	P06730	P09936	P09525	P0C0L4
	P19338	P12814	P50991	P14550	P20073	P02748	P07355	P08574	P06733	P09960	P09543	P0C0S5
	P19367	P12956	P50993	P14618	P20339	P02749	P07384	P08575	P06737	P09972	P09651	P0DMV8
	P20042	P13010	P50995	P14625	P20340	P02751	P07437	P08603	P06744	P0C0L4	P09661	P0DN76
	P20073	P13073	P51148	P14866	P20618	P02753	P07451	P08621	P06748	P0C0L5	P09668	P0DOY2
	P20338	P13473	P51674	P14868	P20645	P02760	P07602	P08670	P06753	P0C0S5	P09874	P0DP23
	P20339	P13489	P51858	P14927	P20700	P02763	P07686	P08697	P06756	P0DJI8	P09936	P10155
	P20340	P13591	P51991	P15259	P21266	P02765	P07711	P08708	P06899	P0DMV8	P09960	P10451
	P20618	P13611	P52209	P15311	P21291	P02766	P07737	P08754	P07099	P0DOY2	P0C0L5	P10599
	P20674	P13639	P52272	P15531	P21333	P02768	P07741	P08758	P07108	P10155	P0C0S5	P10620
	P20700	P13645	P52565	P15559	P21796	P02776	P07814	P08779	P07195	P10451	P0DMV8	P10636
	P20810	P13647	P52943	P15880	P21926	P02787	P07858	P08865	P07203	P10599	P0DN79	P10644
	P21108	P13667	P53621	P16070	P21964	P02788	P07900	P09012	P07237	P10620	P0DOY2	P10768
	P21291	P13671	P53801	P16104	P22061	P02790	P07910	P09104	P07305	P10643	P0DP23	P10809
	P21333	P13674	P54652	P16144	P22234	P02792	P07919	P09211	P07339	P10644	P10155	P10909
	P21695	P13693	P55072	P16152	P22307	P02794	P07954	P09382	P07355	P10768	P10451	P11021
	P21796	P13761	P55081	P16157	P22314	P03188	P08123	P09429	P07384	P10809	P10599	P11047
	P21810	P13796	P55087	P16401	P22392	P03214	P08133	P09455	P07437	P10909	P10620	P11137
	P21926	P13987	P55209	P16403	P22626	P03227	P08195	P09471	P07602	P10915	P10636	P11142
	P21964	P14136	P55795	P16452	P22695	P03277	P08237	P09486	P07737	P11021	P10644	P11171
	P22234	P14314	P58876	P16615	P23142	P03420	P08238	P09525	P07741	P11047	P10768	P11177
	P22307	P14415	P60028	P16671	P23229	P03517	P08240	P09543	P07814	P11142	P10809	P11182
	P22314	P14543	P60033	P17174	P23246	P03928	P08311	P09622	P07858	P11171	P10909	P11216
	P22392	P14618	P60174	P17252	P23284	P04003	P08571	P09651	P07900	P11177	P11021	P11233
	P22570	P14625	P60660	P17302	P23396	P04004	P08579	P09661	P07910	P11215	P11137	P11279
	P22626	P14780	P60709	P17655	P23434	P04040	P08603	P09871	P07942	P11216	P11142	P11310
	P23246	P14866	P60842	P17858	P23470	P04075	P08621	P09874	P07951	P11233	P11171	P11387
	P23284	P14868	P60953	P17931	P23471	P04080	P08670	P09936	P07954	P11279	P11177	P11586
	P23381	P15153	P61020	P17980	P23526	P04083	P08708	P09960	P07996	P11413	P11182	P11766
	P23396	P15311	P61088	P17987	P23528	P04156	P08754	P09972	P08123	P11586	P11216	P11940
	P23434	P15531	P61313	P18085	P23634	P04179	P08758	P0C0L4	P08133	P11766	P11217	P12004
	P23471	P15880	P61586	P18124	P24534	P04196	P08779	P0C0L5	P08195	P11908	P11233	P12109
	P23527	P15924	P61604	P18206	P24821	P04216	P08865	P0C0S5	P08237	P11940	P11279	P12110
	P23528	P16070	P61978	P18669	P25325	P04233	P09012	P0DJI8	P08238	P12081	P11586	P12111
	P23634	P16144	P61981	P19022	P25398	P04259	P09104	P0DMV8	P08246	P12109	P11766	P12236
	P24534	P16152	P62241	P19105	P25705	P04264	P09132	P0DN76	P08311	P12236	P11940	P12270
	P24539	P16157	P62258	P19338	P25787	P04271	P09211	P0DOY2	P08514	P12268	P12081	P12273
	P24752	P16284	P62269	P19367	P25788	P04350	P09382	P0DP23	P08567	P12270	P12235	P12277
	P25398	P16401	P62424	P19823	P25789	P04406	P09417	P10155	P08571	P12277	P12270	P12956
	P25705	P16403	P62491	P19827	P26038	P04587	P09429	P10451	P08572	P12429	P12277	P13010
	P25787	P16615	P62701	P20036	P26196	P04632	P09455	P10599	P08574	P12814	P12694	P13073
	P25788	P16671	P62805	P20039	P26232	P04792	P09471	P10620	P08603	P12956	P12814	P13284
	P26038	P17213	P62820	P20073	P26368	P04839	P09486	P10636	P08621	P13010	P12956	P13489
	P26196	P17480	P62826	P20339	P26583	P04843	P09493	P10643	P08670	P13073	P13010	P13591
	P26232	P17844	P62834	P20340	P26599	P04844	P09525	P10644	P08708	P13284	P13073	P13611
	P26368	P17858	P62851	P20618	P26641	P04875	P09543	P10768	P08758	P13473	P13473	P13639
	P26373	P17931	P62873	P20674	P26885	P04899	P09622	P10809	P08865	P13489	P13489	P13645
	P26583	P17980	P62879	P20700	P27105	P04908	P09651	P10909	P09012	P13591	P13591	P13647
	P26599	P18085	P62891	P21266	P27338	P05023	P09661	P10915	P09104	P13611	P13639	P13667
	P26641	P18124	P62906	P21291	P27348	P05026	P09669	P11021	P09110	P13639	P13645	P13693
	P27338	P18206	P62913	P21333	P27361	P05067	P09874	P11047	P09211	P13645	P13667	P13726
	P27348	P18428	P62937	P21589	P27635	P05090	P09913	P11137	P09382	P13647	P13693	P13804
	P27361	P18669	P62979	P21796	P27695	P05091	P09936	P11142	P09417	P13667	P13726	P13861
	P27635	P19022	P63000	P21810	P27797	P05107	P09960	P11166	P09429	P13671	P13796	P13987
	P27695	P19105	P63092	P21926	P27816	P05109	P09972	P11169	P09455	P13693	P13804	P14136
	P27797	P19338	P63104	P21964	P27824	P05155	P0C0L5	P11215	P09471	P13716	P13861	P14314
	P27816	P19652	P63167	P22061	P28066	P05156	P0C0S5	P11216	P09486	P13761	P13987	P14415
	P27824	P19823	P63220	P22234	P28070	P05164	P0CG29	P11233	P09493	P13796	P14136	P14543
	P28066	P19827	P63267	P22307	P28072	P05198	P0DJW5	P11277	P09525	P13804	P14174	P14550
	P28289	P20036	P68104	P22314	P28074	P05204	P0DMV8	P11279	P09543	P13987	P14209	P14618
	P28482	P20042	P68363	P22392	P28161	P05362	P0DN76	P11387	P09622	P14136	P14314	P14625
	P28838	P20340	P68371	P22626	P28482	P05386	P0DOY2	P11413	P09651	P14174	P14415	P14866
	P29218	P20645	P68400	P22676	P28838	P05387	P0DP23	P11586	P09661	P14209	P14550	P14868
	P29401	P20700	P68431	P22695	P28907	P05388	P10155	P11766	P09871	P14314	P14618	P14927
	P29692	P20851	P68871	P23229	P29218	P05455	P10515	P11908	P09874	P14543	P14625	P15311
	P29966	P21246	P69892	P23284	P29401	P05546	P10599	P11940	P09936	P14550	P14649	P15531
	P30040	P21266	P69905	P23297	P29692	P05556	P10620	P12004	P09960	P14618	P14866	P15880
	P30041	P21291	P78324	P23381	P29762	P06209	P10768	P12081	P09972	P14625	P14868	P16070
	P30042	P21333	P78371	P23396	P29966	P06210	P10809	P12109	P0C0L5	P14780	P14927	P16104
	P30043	P21796	P78527	P23471	P29972	P06396	P10909	P12110	P0C0S5	P14866	P15104	P16152
	P30044	P21810	P80297	P23526	P30040	P06491	P11021	P12111	P0DMV8	P14868	P15311	P16284
	P30046	P21926	P83731	P23528	P30041	P06576	P11137	P12236	P0DN76	P15144	P15328	P16401
	P30048	P21964	P84103	P23588	P30043	P06681	P11142	P12268	P0DOY2	P15259	P15374	P16403
	P30049	P22087	P98172	P23634	P30044	P06702	P11177	P12270	P0DP23	P15311	P15531	P16444
	P30050	P22234	Q00325	P24534	P30046	P06703	P11216	P12273	P10155	P15328	P15880	P16615
	P30084	P22314	Q00610	P24539	P30048	P06727	P11233	P12277	P10253	P15531	P15927	P16949
	P30086	P22392	Q00839	P24666	P30049	P06733	P11279	P12429	P10321	P15880	P16070	P17480
	P30101	P22626	Q01082	P24752	P30050	P06744	P11387	P12814	P10451	P16070	P16104	P17568
	P30153	P22695	Q01130	P24821	P30086	P06748	P11413	P12956	P10599	P16104	P16152	P17655
	P30273	P23142	Q01484	P24844	P30101	P06753	P11532	P13010	P10619	P16144	P16401	P17677
	P30533	P23229	Q01974	P25398	P30153	P06756	P11586	P13073	P10620	P16152	P16403	P17844
	P30626	P23246	Q02252	P25705	P30626	P07099	P11766	P13164	P10636	P16284	P16930	P17858
	P31153	P23284	Q02543	P25787	P31153	P07195	P11940	P13473	P10768	P16401	P16949	P17980
	P31937	P23396	Q02878	P25788	P31930	P07197	P12004	P13489	P10809	P16403	P17174	P17987
	P31942	P23528	Q03252	P25789	P31937	P07202	P12109	P13591	P10909	P16671	P17252	P18085
	P31943	P23634	Q06481	P26022	P31939	P07203	P12110	P13611	P10915	P17050	P17302	P18124
	P31946	P24158	Q06830	P26038	P31942	P07237	P12111	P13639	P11021	P17174	P17480	P18206
	P31948	P24534	Q07020	P26232	P31943	P07305	P12236	P13645	P11047	P17213	P17655	P18583
	P31949	P24821	Q07065	P26368	P31946	P07311	P12268	P13647	P11137	P17655	P17858	P18669
	P32119	P24844	Q07666	P26583	P31948	P07339	P12270	P13667	P11142	P17858	P17931	P18754
	P32856	P25311	Q07954	P26599	P32119	P07355	P12277	P13671	P11166	P17931	P17980	P19022
	P34932	P25705	Q07955	P26641	P34932	P07384	P12814	P13674	P11177	P17980	P17987	P19105
	P35080	P25787	Q08170	P26885	P35080	P07437	P12955	P13693	P11215	P17987	P18124	P19338
	P35221	P25789	Q08211	P27105	P35221	P07602	P12956	P13716	P11216	P18085	P18206	P19525
	P35222	P26022	Q09666	P27338	P35222	P07711	P13010	P13760	P11233	P18124	P18669	P19652
	P35232	P26038	Q12765	P27348	P35232	P07737	P13073	P13762	P11277	P18206	P19022	P19823
	P35237	P26196	Q12846	P27361	P35237	P07741	P13473	P13796	P11279	P18428	P19105	P20042
	P35241	P26368	Q12860	P27635	P35241	P07858	P13489	P13798	P11310	P18669	P19338	P20338
	P35268	P26373	Q12874	P27695	P35244	P07864	P13521	P13804	P11387	P19022	P19367	P20339
	P35527	P26583	Q12888	P27797	P35268	P07900	P13591	P13861	P11413	P19105	P19404	P20340
	P35579	P26599	Q12905	P27824	P35527	P07910	P13639	P13987	P11586	P19320	P19525	P20618
	P35580	P26640	Q12906	P28065	P35580	P07996	P13645	P14136	P11766	P19338	P20042	P20645
	P35611	P26641	Q13151	P28066	P35611	P08069	P13667	P14174	P11940	P19367	P20073	P20700
	P35612	P26885	Q13177	P28074	P35613	P08123	P13693	P14314	P12004	P19652	P20290	P21246
	P35613	P27105	Q13185	P28161	P35637	P08133	P13716	P14324	P12109	P19823	P20339	P21281
	P35637	P27169	Q13247	P28482	P35659	P08134	P13761	P14406	P12110	P19827	P20340	P21291
	P35659	P27338	Q13263	P28838	P35908	P08195	P13796	P14415	P12111	P19971	P20618	P21333
	P35908	P27348	Q13449	P29218	P36405	P08218	P13804	P14543	P12236	P20036	P20674	P21796
	P36543	P27635	Q13509	P29401	P36578	P08237	P13861	P14550	P12268	P20039	P20700	P21810
	P36578	P27695	Q13523	P29692	P36957	P08238	P13987	P14618	P12270	P20073	P20810	P21926
	P36969	P27797	Q13526	P29966	P36959	P08246	P14136	P14625	P12277	P20160	P21266	P21964
	P37108	P27816	Q13561	P29972	P36969	P08311	P14174	P14780	P12814	P20290	P21281	P22061
	P37802	P27824	Q13641	P30038	P37108	P08571	P14207	P14866	P12956	P20292	P21291	P22087
	P37837	P28482	Q13642	P30040	P37235	P08572	P14209	P14868	P13010	P20339	P21333	P22102
	P37840	P28676	Q13765	P30041	P37802	P08575	P14314	P15144	P13073	P20340	P21399	P22234
	P38117	P29401	Q13813	P30043	P37837	P08603	P14317	P15289	P13489	P20618	P21796	P22307
	P38159	P29692	Q13838	P30044	P38117	P08621	P14550	P15311	P13591	P20645	P21912	P22314
	P38606	P29966	Q13885	P30046	P38646	P08637	P14618	P15328	P13611	P20700	P21926	P22392
	P38646	P29972	Q13938	P30048	P38919	P08670	P14625	P15531	P13639	P21266	P21964	P22626
	P38919	P30040	Q14011	P30049	P39019	P08697	P14866	P15880	P13645	P21281	P22061	P22676
	P39019	P30041	Q14103	P30050	P39023	P08708	P14868	P16070	P13647	P21291	P22087	P22695
	P39023	P30043	Q14108	P30085	P39687	P08754	P14920	P16104	P13667	P21333	P22102	P22748
	P39060	P30044	Q14118	P30086	P40227	P08758	P14927	P16144	P13671	P21399	P22234	P23193
	P39687	P30046	Q14141	P30101	P40925	P08779	P15121	P16152	P13674	P21796	P22307	P23246
	P40227	P30048	Q14151	P30153	P40926	P08865	P15170	P16157	P13693	P21926	P22314	P23284
	P40855	P30050	Q14165	P30483	P40939	P09012	P15259	P16401	P13716	P21964	P22392	P23368
	P40925	P30086	Q14194	P30491	P41091	P09104	P15289	P16403	P13726	P22061	P22626	P23396
	P40926	P30101	Q14195	P30493	P41208	P09211	P15311	P16452	P13796	P22234	P22695	P23434
	P40939	P30153	Q14204	P30533	P42126	P09257	P15328	P16615	P13798	P22307	P22748	P23470
	P41091	P30493	Q14247	P30626	P42167	P09289	P15374	P16671	P13804	P22314	P23193	P23471
	P41208	P30533	Q14257	P31153	P42330	P09382	P15531	P16930	P13861	P22392	P23229	P23511
	P42126	P30740	Q14344	P31937	P42785	P09429	P15586	P17050	P13987	P22626	P23246	P23526
	P42167	P31146	Q14444	P31942	P43003	P09455	P15880	P17174	P14136	P22695	P23284	P23527
	P42224	P31930	Q14683	P31946	P43034	P09467	P16070	P17301	P14209	P22894	P23297	P23528
	P42766	P31942	Q14697	P31947	P43243	P09471	P16104	P17302	P14314	P23083	P23381	P23634
	P43003	P31943	Q14839	P31948	P43307	P09486	P16152	P17480	P14415	P23142	P23396	P24534
	P43034	P31946	Q14847	P31949	P43487	P09493	P16220	P17655	P14543	P23229	P23434	P24539
	P43243	P31948	Q14938	P32119	P45880	P09496	P16401	P17677	P14550	P23246	P23471	P24666
	P43487	P31949	Q14974	P32969	P45973	P09497	P16403	P17844	P14618	P23284	P23515	P24752
	P45880	P31997	Q14980	P34932	P45974	P09525	P16615	P17858	P14625	P23381	P23526	P24821
	P45973	P32119	Q14CZ8	P35052	P46108	P09543	P16671	P17931	P14780	P23396	P23528	P24928
	P46777	P32969	Q15019	P35080	P46109	P09622	P16930	P17980	P14866	P23471	P23588	P25398
	P46778	P34932	Q15056	P35221	P46439	P09651	P16949	P17987	P14868	P23526	P23634	P25445
	P46782	P35080	Q15084	P35222	P46776	P09661	P17050	P18124	P15104	P23528	P24534	P25685
	P46783	P35221	Q15149	P35232	P46777	P09874	P17480	P18206	P15311	P24158	P24539	P25686
	P46821	P35222	Q15165	P35237	P46778	P09936	P17568	P18621	P15531	P24534	P24593	P25705
	P46940	P35232	Q15233	P35241	P46781	P09960	P17655	P18669	P15586	P24539	P24666	P25787
	P46976	P35237	Q15287	P35268	P46782	P09972	P17844	P19022	P15880	P24593	P24752	P25788
	P47755	P35241	Q15334	P35527	P46821	P0C0L5	P17858	P19105	P16070	P24666	P25325	P25789
	P47756	P35527	Q15365	P35579	P46940	P0C0S5	P17980	P19338	P16104	P24752	P25398	P26038
	P48047	P35555	Q15366	P35580	P46976	P0C140	P17987	P19367	P16144	P24821	P25685	P26196
	P48643	P35579	Q15417	P35611	P47755	P0C623	P18124	P19652	P16152	P24844	P25705	P26232
	P48681	P35580	Q15424	P35613	P47756	P0C6S8	P18206	P19823	P16157	P25311	P25786	P26368
	P48735	P35611	Q15459	P35637	P48047	P0C6X4	P18463	P19827	P16284	P25398	P25787	P26583
	P49189	P35613	Q15691	P35659	P48509	P0C6X5	P18583	P19971	P16401	P25445	P25788	P26599
	P49368	P35637	Q15836	P35908	P48643	P0C6X6	P18615	P20036	P16403	P25705	P25789	P26641
	P49411	P35659	Q16181	P36222	P48735	P0C862	P18669	P20039	P16615	P25787	P26038	P26885
	P49419	P35749	Q16527	P36269	P49189	P0C874	P18859	P20042	P16930	P25788	P26196	P27105
	P49721	P35858	Q16555	P36405	P49368	P0CG36	P19022	P20073	P16949	P25789	P26232	P27338
	P49748	P35908	Q16620	P36543	P49411	P0DJI8	P19105	P20160	P16989	P25815	P26368	P27348
	P49750	P36222	Q16629	P36578	P49419	P0DJU6	P19338	P20338	P17050	P26022	P26373	P27361
	P49755	P36269	Q16643	P36871	P49588	P0DMV8	P19404	P20339	P17174	P26038	P26583	P27635
	P50395	P36405	Q16698	P36959	P49720	P0DN76	P19525	P20340	P17213	P26232	P26599	P27694
	P50402	P36578	Q16777	P37235	P49721	P0DOX2	P19652	P20618	P17655	P26368	P26639	P27695
	P50502	P36873	Q16799	P37802	P49755	P0DOX5	P19784	P20645	P17677	P26373	P26641	P27797
	P50897	P36955	Q1KMD3	P37837	P50148	P0DOY2	P20020	P20700	P17844	P26447	P26885	P27816
	P50990	P36980	Q2TAY7	P37840	P50213	P0DP23	P20042	P20810	P17858	P26583	P27105	P27824
	P50991	P37802	Q52LJ0	P38117	P50395	P0DPD5	P20290	P21266	P17931	P26599	P27338	P28066
	P50993	P37837	Q5IJ48	P38646	P50454	P10155	P20339	P21281	P17980	P26641	P27348	P28070
	P51148	P37840	Q5JRA6	P39019	P50502	P10316	P20340	P21291	P17987	P26885	P27635	P28072
	P51149	P38606	Q5JTV8	P39060	P50897	P10321	P20591	P21333	P18085	P27105	P27695	P28482
	P51572	P38646	Q5KU26	P39687	P50990	P10586	P20618	P21399	P18124	P27169	P27797	P28838
	P51608	P39019	Q5SSJ5	P40227	P50991	P10599	P20645	P21589	P18206	P27338	P27816	P29218
	P51674	P39023	Q5T749	P40261	P50993	P10620	P20674	P21796	P18583	P27348	P27824	P29373
	P51858	P39060	Q66PJ3	P40925	P51148	P10644	P20700	P21810	P18621	P27361	P28066	P29401
	P51991	P39687	Q6IAA8	P40926	P51149	P10768	P20810	P21926	P18669	P27635	P28070	P29692
	P52272	P40227	Q6P2Q9	P40939	P51178	P10809	P21266	P21964	P18859	P27695	P28072	P29966
	P52565	P40925	Q6UN15	P41208	P51531	P10909	P21281	P22061	P19022	P27701	P28074	P30040
	P52597	P40926	Q6UXB8	P42167	P51571	P10915	P21291	P22087	P19105	P27797	P28161	P30041
	P52943	P40939	Q71U36	P42330	P51572	P11021	P21333	P22102	P19320	P27824	P28289	P30043
	P54652	P41218	Q7L4I2	P42785	P51649	P11047	P21399	P22234	P19338	P28065	P28331	P30044
	P54727	P42167	Q7Z7K6	P43003	P51674	P11137	P21796	P22307	P19367	P28066	P28482	P30047
	P55010	P43003	Q86UE4	P43034	P51858	P11142	P21810	P22314	P19652	P28070	P28838	P30048
	P55036	P43034	Q86UP2	P43121	P51991	P11166	P21926	P22352	P19823	P28161	P28907	P30049
	P55072	P43121	Q86Y82	P43243	P52209	P11177	P21964	P22392	P19827	P28482	P29218	P30050
	P55084	P43243	Q8IWA5	P43307	P52272	P11215	P22061	P22626	P19971	P28676	P29401	P30085
	P55087	P43307	Q8IX01	P43487	P52565	P11216	P22087	P22695	P20036	P28838	P29692	P30086
	P55209	P43490	Q8IZP0	P43490	P52597	P11217	P22102	P22792	P20042	P29218	P29966	P30101
	P55769	P43652	Q8N126	P43686	P52758	P11233	P22234	P23083	P20073	P29401	P29992	P30153
	P55786	P43686	Q8N163	P45880	P52943	P11277	P22307	P23142	P20290	P29692	P30040	P30453
	P55795	P45880	Q8N257	P45973	P53004	P11279	P22314	P23229	P20339	P29966	P30041	P30493
	P56134	P45973	Q8N2G4	P45974	P53801	P11387	P22392	P23246	P20591	P29972	P30042	P30533
	P57105	P46063	Q8N4V1	P46108	P53999	P11413	P22415	P23284	P20618	P30038	P30043	P30626
	P58107	P46108	Q8N6C5	P46109	P54289	P11532	P22626	P23381	P20645	P30040	P30044	P31153
	P58546	P46109	Q8N7J2	P46777	P54652	P11586	P22670	P23396	P20700	P30041	P30046	P31689
	P58876	P46776	Q8NBJ4	P46778	P54727	P11766	P22695	P23434	P20810	P30042	P30048	P31930
	P60028	P46777	Q8NBX0	P46781	P54920	P12109	P22748	P23471	P21246	P30043	P30049	P31939
	P60033	P46778	Q8NC51	P46782	P55010	P12110	P23193	P23526	P21266	P30044	P30050	P31942
	P60174	P46781	Q8NC56	P46821	P55036	P12111	P23246	P23528	P21281	P30046	P30084	P31943
	P60660	P46782	Q8NFZ8	P46940	P55072	P12235	P23284	P23588	P21291	P30048	P30085	P31946
	P60709	P46783	Q92499	P46976	P55084	P12236	P23368	P23634	P21333	P30049	P30086	P31948
	P60842	P46821	Q92752	P47755	P55087	P12268	P23381	P24534	P21399	P30050	P30101	P32004
	P60866	P46940	Q92804	P47756	P55209	P12270	P23396	P24539	P21589	P30084	P30153	P32119
	P60900	P46976	Q92823	P48047	P55769	P12273	P23434	P24752	P21741	P30085	P30405	P32322
	P60903	P47755	Q92841	P48643	P55786	P12277	P23470	P24821	P21796	P30086	P30493	P32969
	P60953	P47756	Q92896	P48681	P55795	P12318	P23471	P25325	P21810	P30101	P30533	P33176
	P60981	P47985	Q92945	P48735	P56134	P12532	P23526	P25398	P21926	P30153	P30626	P33316
	P61019	P48047	Q96A26	P49189	P57087	P12592	P23528	P25705	P21964	P30405	P31040	P34932
	P61020	P48643	Q96AG4	P49368	P58546	P12814	P23588	P25786	P21980	P30479	P31153	P35052
	P61026	P48735	Q96AQ6	P49411	P60028	P12956	P23921	P25787	P22061	P30512	P31689	P35080
	P61088	P49189	Q96B54	P49419	P60033	P13010	P24534	P25788	P22087	P30533	P31937	P35221
	P61106	P49321	Q96FZ7	P49588	P60174	P13073	P24539	P25789	P22102	P30626	P31939	P35222
	P61158	P49368	Q96GW7	P49721	P60201	P13164	P24666	P26022	P22234	P30740	P31942	P35232
	P61160	P49411	Q96HN2	P49748	P60660	P13473	P24752	P26038	P22307	P31146	P31943	P35237
	P61201	P49419	Q96HY6	P49755	P60709	P13489	P24928	P26232	P22314	P31153	P31946	P35241
	P61204	P49748	Q96KP4	P49773	P60842	P13569	P25208	P26368	P22392	P31930	P31947	P35244
	P61224	P49755	Q96KR1	P49913	P60900	P13591	P25398	P26583	P22626	P31937	P31948	P35249
	P61247	P49913	Q96PK6	P50148	P60953	P13611	P25445	P26599	P22695	P31939	P31949	P35268
	P61254	P50395	Q96PU8	P50213	P60981	P13639	P25685	P26639	P23083	P31946	P32119	P35527
	P61353	P50454	Q99497	P50225	P60983	P13645	P25705	P26641	P23142	P31948	P32969	P35579
	P61457	P50502	Q99536	P50395	P61019	P13647	P25786	P26885	P23229	P31949	P33240	P35580
	P61586	P50895	Q99733	P50454	P61020	P13667	P25787	P27105	P23246	P31997	P34896	P35606
	P61604	P50990	Q99798	P50502	P61026	P13693	P25788	P27169	P23284	P32119	P34932	P35611
	P61764	P50991	Q99832	P50895	P61088	P13716	P25789	P27338	P23368	P32942	P34949	P35613
	P61916	P50993	Q9BUF5	P50897	P61106	P13761	P26038	P27348	P23381	P32969	P35052	P35637
	P61923	P51148	Q9BUJ2	P50914	P61158	P13796	P26196	P27635	P23396	P33121	P35080	P35659
	P61978	P51149	Q9BUT1	P50990	P61160	P13804	P26232	P27694	P23434	P33176	P35221	P35908
	P61981	P51178	Q9BVA1	P50991	P61163	P13889	P26368	P27695	P23471	P34932	P35222	P35998
	P62081	P51570	Q9BVK6	P50993	P61201	P13901	P26440	P27797	P23526	P35080	P35232	P36269
	P62140	P51572	Q9BW30	P50995	P61204	P13987	P26583	P27816	P23528	P35221	P35237	P36405
	P62241	P51608	Q9BY67	P51148	P61224	P14136	P26599	P27824	P23588	P35222	P35241	P36578
	P62249	P51648	Q9GZT4	P51149	P61225	P14174	P26639	P28062	P23634	P35232	P35244	P36871
	P62258	P51665	Q9GZV4	P51178	P61247	P14207	P26641	P28066	P23921	P35237	P35268	P36969
	P62269	P51884	Q9H0U4	P51571	P61313	P14209	P26885	P28070	P24043	P35241	P35269	P37108
	P62277	P51888	Q9H1C3	P51572	P61353	P14314	P27105	P28072	P24158	P35268	P35270	P37235
	P62304	P51991	Q9H1E3	P51608	P61457	P14406	P27144	P28074	P24534	P35527	P35527	P37802
	P62310	P52209	Q9H307	P51648	P61586	P14415	P27338	P28482	P24539	P35542	P35579	P37837
	P62314	P52272	Q9H3Q1	P51665	P61604	P14543	P27348	P28676	P24666	P35579	P35580	P37840
	P62318	P52565	Q9H425	P51674	P61916	P14550	P27361	P28838	P24752	P35580	P35611	P38117
	P62333	P52597	Q9H4F8	P51884	P61978	P14618	P27635	P29218	P24821	P35611	P35612	P38159
	P62424	P52907	Q9H4G4	P51991	P61981	P14625	P27695	P29401	P24844	P35613	P35613	P38606
	P62491	P52943	Q9H8H3	P52209	P62140	P14866	P27701	P29692	P25325	P35637	P35637	P38646
	P62495	P53396	Q9HDC9	P52272	P62191	P14868	P27797	P29762	P25398	P35659	P35659	P38919
	P62701	P54652	Q9NQ34	P52565	P62241	P14927	P27816	P29966	P25445	P35754	P35908	P39019
	P62750	P54727	Q9NRR3	P52597	P62244	P15153	P27824	P29972	P25705	P35908	P35998	P39023
	P62805	P55036	Q9NRX4	P52758	P62249	P15291	P28065	P30040	P25787	P36222	P36222	P39060
	P62820	P55072	Q9NVA2	P52907	P62258	P15311	P28066	P30041	P25789	P36269	P36269	P39656
	P62826	P55084	Q9NYF8	P52943	P62269	P15328	P28070	P30042	P26022	P36405	P36405	P39687
	P62829	P55087	Q9NYL9	P53004	P62304	P15502	P28072	P30043	P26038	P36543	P36507	P40121
	P62834	P55145	Q9NZR1	P53990	P62310	P15531	P28074	P30044	P26196	P36578	P36543	P40227
	P62851	P55209	Q9P0M6	P53999	P62318	P15622	P28161	P30046	P26232	P36871	P36578	P40424
	P62861	P55268	Q9P121	P54578	P62333	P15880	P28289	P30048	P26368	P36957	P36871	P40855
	P62873	P55769	Q9P258	P54652	P62424	P16070	P28331	P30049	P26583	P36959	P36957	P40925
	P62879	P55786	Q9P2E9	P54725	P62701	P16104	P28370	P30050	P26599	P37802	P36959	P40926
	P62888	P56199	Q9P2K5	P54727	P62714	P16144	P28482	P30085	P26639	P37837	P36969	P40939
	P62913	P58546	Q9UBI6	P54819	P62745	P16152	P28676	P30086	P26641	P38117	P37108	P41091
	P62917	P60028	Q9UBQ7	P54920	P62805	P16157	P28838	P30101	P26885	P38606	P37198	P41208
	P62937	P60033	Q9UBS4	P55010	P62820	P16188	P28907	P30153	P27105	P38646	P37802	P41217
	P62979	P60174	Q9UD71	P55036	P62826	P16278	P29218	P30273	P27338	P39019	P37837	P42126
	P62995	P60660	Q9UEY8	P55072	P62834	P16401	P29401	P30419	P27348	P39060	P37840	P42167
	P63000	P60709	Q9UHL4	P55084	P62847	P16402	P29590	P30453	P27635	P39656	P38117	P42224
	P63092	P60842	Q9UJU6	P55087	P62851	P16435	P29692	P30491	P27694	P39687	P38159	P42704
	P63104	P60866	Q9UKV3	P55145	P62873	P16519	P29966	P30533	P27695	P40121	P38646	P42765
	P63167	P60900	Q9UN36	P55209	P62879	P16615	P29972	P30626	P27701	P40227	P38919	P42766
	P63172	P60903	Q9UQ35	P55268	P62888	P16671	P30038	P30740	P27797	P40261	P39019	P43003
	P63208	P60953	Q9UQ80	P55735	P62910	P16729	P30040	P31146	P27816	P40925	P39060	P43034
	P63241	P61019	Q9UQB3	P55769	P62937	P16818	P30041	P31153	P27824	P40926	P39687	P43121
	P63244	P61026	Q9UQE7	P55786	P62979	P17100	P30042	P31689	P28062	P40939	P40227	P43243
	P67809	P61088	Q9Y230	P55957	P62993	P17143	P30043	P31930	P28065	P41208	P40261	P43304
	P67936	P61106	Q9Y265	P56134	P62995	P17302	P30044	P31939	P28066	P41218	P40763	P43307
	P68032	P61158	Q9Y2J2	P58546	P63000	P17480	P30046	P31942	P28070	P41250	P40855	P43487
	P68104	P61160	Q9Y2W1	P59998	P63010	P17568	P30047	P31943	P28072	P41567	P40925	P45880
	P68363	P61204	Q9Y383	P60028	P63092	P17655	P30048	P31946	P28161	P42025	P40926	P45973
	P68371	P61224	Q9Y3I0	P60033	P63096	P17813	P30049	P31948	P28331	P42126	P40939	P45974
	P68400	P61247	Q9Y3U8	P60174	P63104	P17844	P30050	P31949	P28482	P42167	P41208	P46108
	P68871	P61313	Q9Y3Z3	P60660	P63167	P17858	P30084	P32119	P28676	P42785	P41222	P46109
	P69891	P61353	Q9Y490	P60709	P63172	P17931	P30085	P32969	P28799	P43003	P41223	P46776
	P69905	P61586	Q9Y617	P60842	P63208	P17980	P30086	P34932	P28838	P43034	P41250	P46777
	P78347	P61604	Q9Y624	P60891	P63241	P17987	P30101	P35052	P29218	P43121	P41567	P46778
	P78371	P61626		P60900	P63244	P18124	P30153	P35080	P29401	P43243	P42126	P46782
	P78527	P61769		P60903	P67936	P18206	P30493	P35221	P29692	P43307	P42167	P46783
	P78559	P61916		P60953	P68036	P18405	P30519	P35222	P29966	P43487	P42330	P46821
	P80404	P61978		P60981	P68104	P18463	P30533	P35232	P29972	P43490	P42785	P46926
	P80723	P61981		P60983	P68363	P18583	P30626	P35237	P29992	P43686	P43003	P47736
	P82979	P62081		P61019	P68371	P18627	P30876	P35241	P30038	P45880	P43034	P47755
	P83731	P62140		P61020	P68400	P18669	P31146	P35268	P30040	P45973	P43121	P47756
	P83916	P62241		P61026	P68431	P19022	P31153	P35414	P30041	P45974	P43243	P48047
	P84090	P62249		P61081	P68871	P19105	P31323	P35527	P30042	P46108	P43307	P48643
	P84098	P62258		P61088	P69891	P19338	P31689	P35542	P30043	P46109	P43487	P48681
	P84103	P62269		P61106	P69905	P19367	P31930	P35579	P30044	P46777	P43490	P48735
	P84243	P62280		P61158	P78310	P19404	P31937	P35580	P30046	P46778	P43686	P49006
	P98172	P62314		P61160	P78347	P19525	P31939	P35611	P30048	P46781	P45880	P49189
	Q00059	P62318		P61163	P78371	P19652	P31942	P35612	P30049	P46782	P45973	P49321
	Q00577	P62424		P61204	P78527	P19823	P31943	P35613	P30050	P46783	P45974	P49327
	Q00610	P62701		P61224	P80723	P19827	P31946	P35637	P30084	P46821	P46108	P49368
	Q00688	P62714		P61247	P81605	P19971	P31948	P35659	P30085	P46940	P46109	P49411
	Q00839	P62753		P61586	P83916	P20036	P31949	P35908	P30086	P46976	P46778	P49419
	Q01082	P62805		P61604	P84103	P20073	P32119	P35998	P30101	P47755	P46781	P49585
	Q01105	P62820		P61769	P84243	P20292	P32455	P36021	P30153	P47756	P46782	P49588
	Q01130	P62826		P61916	P98095	P20339	P32856	P36222	P30453	P48047	P46783	P49590
	Q01484	P62829		P61970	P98172	P20340	P32969	P36269	P30508	P48444	P46821	P49720
	Q01813	P62847		P61978	Q00577	P20492	P33176	P36405	P30533	P48643	P46937	P49721
	Q01831	P62851		P61981	Q00610	P20531	P33240	P36542	P30626	P48681	P46940	P49750
	Q01844	P62879		P62081	Q00688	P20532	P34932	P36543	P30740	P48735	P46976	P49755
	Q02818	P62937		P62140	Q00839	P20592	P34949	P36578	P31146	P48960	P47755	P49756
	Q02878	P62979		P62191	Q01082	P20618	P35052	P36871	P31153	P49189	P47756	P49773
	Q02880	P63000		P62241	Q01105	P20640	P35080	P36957	P31689	P49327	P48047	P49915
	Q03252	P63092		P62244	Q01469	P20645	P35221	P36959	P31930	P49354	P48643	P50395
	Q04760	P63104		P62258	Q01518	P20700	P35222	P37108	P31937	P49368	P48681	P50402
	Q04837	P63173		P62266	Q01995	P20813	P35232	P37802	P31939	P49419	P48735	P50416
	Q04917	P63208		P62269	Q02252	P20851	P35237	P37837	P31942	P49588	P49006	P50454
	Q04941	P63241		P62304	Q02543	P20929	P35241	P37840	P31943	P49591	P49189	P50502
	Q05519	P63244		P62333	Q02878	P20962	P35250	P38159	P31946	P49720	P49321	P50895
	Q06323	P67809		P62714	Q03252	P21040	P35268	P38606	P31948	P49721	P49327	P50897
	Q06830	P67936		P62745	Q04760	P21266	P35270	P38646	P31949	P49748	P49354	P50914
	Q07020	P68032		P62753	Q04837	P21281	P35414	P38919	P32119	P49755	P49368	P50990
	Q07021	P68036		P62805	Q04917	P21291	P35527	P39019	P32969	P49773	P49411	P50991
	Q07065	P68104		P62820	Q05519	P21333	P35579	P39023	P33176	P49913	P49419	P50993
	Q07666	P68363		P62826	Q06323	P21399	P35580	P39060	P34897	P50148	P49588	P51148
	Q07955	P68371		P62834	Q06830	P21401	P35606	P39656	P34932	P50213	P49591	P51149
	Q08170	P68431		P62841	Q07020	P21796	P35611	P39687	P35052	P50395	P49720	P51513
	Q08211	P68871		P62847	Q07021	P21810	P35612	P40227	P35080	P50454	P49721	P51532
	Q08257	P69891		P62851	Q07065	P21815	P35613	P40261	P35221	P50502	P49748	P51571
	Q08380	P69905		P62854	Q07954	P21817	P35637	P40763	P35222	P50552	P49755	P51572
	Q08945	P78371		P62873	Q07955	P21860	P35659	P40925	P35232	P50897	P49773	P51608
	Q09666	P78527		P62879	Q07960	P21926	P35908	P40926	P35237	P50914	P49913	P51610
	Q12824	P80188		P62888	Q08170	P21964	P35998	P40939	P35241	P50990	P50148	P51648
	Q12846	P80723		P62937	Q08211	P21980	P36269	P41091	P35268	P50991	P50150	P51649
	Q12860	P81605		P62979	Q08945	P22061	P36405	P41208	P35269	P50993	P50213	P51659
	Q12888	P82979		P62993	Q09028	P22087	P36507	P41218	P35527	P50995	P50395	P51665
	Q12905	P83731		P62995	Q09666	P22234	P36542	P41250	P35555	P51148	P50454	P51674
	Q12906	P84103		P63000	Q12765	P22307	P36543	P42025	P35579	P51149	P50502	P51858
	Q12931	P84243		P63010	Q12846	P22314	P36578	P42167	P35580	P51178	P50895	P51884
	Q13011	P98160		P63092	Q12860	P22352	P36776	P42224	P35606	P51531	P50897	P51991
	Q13148	Q00325		P63104	Q12905	P22392	P36871	P42766	P35611	P51571	P50914	P52209
	Q13185	Q00610		P63208	Q12906	P22570	P36957	P42785	P35613	P51572	P50990	P52272
	Q13228	Q00839		P63241	Q13011	P22626	P36969	P43003	P35637	P51649	P50991	P52565
	Q13242	Q01082		P63244	Q13148	P22694	P37108	P43034	P35659	P51659	P50993	P52566
	Q13243	Q01105		P67936	Q13151	P22695	P37198	P43121	P35908	P51665	P50995	P52597
	Q13247	Q01469		P68032	Q13185	P22748	P37235	P43243	P35998	P51674	P51148	P52758
	Q13263	Q01518		P68036	Q13228	P23074	P37802	P43307	P36222	P51858	P51149	P52907
	Q13283	Q01813		P68104	Q13242	P23142	P37837	P43487	P36269	P51884	P51178	P52943
	Q13308	Q01995		P68363	Q13247	P23229	P37840	P43490	P36405	P51991	P51571	P53004
	Q13409	Q02413		P68371	Q13263	P23246	P38117	P43652	P36543	P52209	P51572	P53007
	Q13418	Q02543		P68400	Q13283	P23284	P38159	P43686	P36578	P52272	P51608	P53621
	Q13427	Q02878		P68402	Q13449	P23297	P38606	P45880	P36871	P52306	P51648	P53801
	Q13435	Q02880		P68871	Q13491	P23381	P38646	P45973	P36959	P52565	P51649	P53990
	Q13449	Q02978		P69891	Q13509	P23396	P38919	P45974	P36969	P52566	P51665	P53999
	Q13491	Q03135		P69892	Q13510	P23470	P39019	P46060	P37108	P52597	P51674	P54105
	Q13510	Q03252		P69905	Q13557	P23471	P39060	P46063	P37802	P52758	P51858	P54136
	Q13523	Q03591		P78310	Q13561	P23526	P39656	P46108	P37837	P52790	P51884	P54578
	Q13526	Q04917		P78371	Q13641	P23527	P39687	P46109	P37840	P52907	P51991	P54709
	Q13561	Q04941		P78527	Q13642	P23528	P40121	P46439	P38159	P52943	P52209	P54725
	Q13595	Q05682		P80404	Q13765	P23588	P40222	P46776	P38606	P53004	P52272	P54727
	Q13596	Q05707		P80723	Q13813	P23945	P40227	P46777	P38646	P53990	P52306	P54760
	Q13642	Q06323		P83731	Q13838	P24534	P40261	P46778	P38919	P53999	P52565	P54920
	Q13765	Q06830		P83916	Q13885	P24539	P40424	P46781	P39019	P54136	P52566	P55010
	Q13813	Q07020		P84103	Q13938	P24666	P40763	P46782	P39023	P54578	P52594	P55036
	Q13838	Q07021		P84243	Q14011	P24752	P40855	P46783	P39060	P54652	P52597	P55060
	Q13938	Q07065		P99999	Q14019	P24821	P40925	P46821	P39656	P54709	P52758	P55072
	Q14008	Q07954		Q00610	Q14103	P24844	P40926	P46940	P39687	P54725	P52815	P55081
	Q14011	Q07955		Q00688	Q14108	P25398	P40939	P46976	P39748	P54727	P52907	P55084
	Q14103	Q07960		Q00796	Q14118	P25445	P41091	P47755	P40121	P54819	P52943	P55087
	Q14108	Q08211		Q00839	Q14160	P25686	P41208	P47756	P40227	P54920	P53990	P55145
	Q14112	Q08380		Q01082	Q14194	P25705	P41217	P48047	P40261	P55010	P53992	P55209
	Q14118	Q08431		Q01105	Q14195	P25787	P41223	P48637	P40424	P55036	P53999	P55265
	Q14157	Q08945		Q01469	Q14204	P25788	P41240	P48643	P40763	P55058	P54577	P55268
	Q14165	Q09666		Q01484	Q14240	P25789	P41250	P48681	P40925	P55072	P54578	P55769
	Q14195	Q10567		Q01518	Q14257	P25791	P42126	P48735	P40926	P55084	P54725	P55786
	Q14204	Q12765		Q01813	Q14344	P26022	P42166	P49006	P40939	P55087	P54727	P55795
	Q14240	Q12805		Q01995	Q14444	P26029	P42167	P49189	P41091	P55145	P54819	P55809
	Q14247	Q12846		Q02252	Q14498	P26038	P42224	P49321	P41208	P55209	P54920	P55884
	Q14257	Q12860		Q02878	Q14697	P26196	P42285	P49327	P41218	P55268	P55010	P56134
	Q14344	Q12888		Q02952	Q14974	P26232	P42704	P49368	P42025	P55769	P55036	P56537
	Q14444	Q12905		Q03135	Q14980	P26368	P42765	P49411	P42167	P55786	P55058	P58546
	Q14498	Q12906		Q03252	Q14CZ8	P26447	P42766	P49419	P42224	P55795	P55072	P58876
	Q14683	Q12907		Q04637	Q15019	P26583	P42785	P49588	P42765	P55957	P55083	P60028
	Q14697	Q13011		Q04760	Q15049	P26599	P43003	P49591	P42785	P56134	P55084	P60033
	Q14714	Q13148		Q04828	Q15056	P26641	P43034	P49720	P43003	P56537	P55087	P60174
	Q14839	Q13151		Q04917	Q15075	P26676	P43121	P49721	P43034	P58546	P55145	P60201
	Q14938	Q13162		Q04941	Q15084	P26885	P43243	P49748	P43121	P59665	P55209	P60468
	Q14966	Q13185		Q05682	Q15121	P27019	P43307	P49755	P43243	P59998	P55263	P60660
	Q14974	Q13200		Q06323	Q15149	P27105	P43487	P49773	P43307	P60028	P55290	P60709
	Q14980	Q13201		Q06830	Q15165	P27169	P43490	P49913	P43487	P60033	P55769	P60842
	Q14CZ8	Q13228		Q07020	Q15181	P27338	P43686	P50148	P43490	P60174	P55786	P60866
	Q15019	Q13263		Q07021	Q15185	P27348	P43897	P50395	P43686	P60660	P55795	P60880
	Q15029	Q13409		Q07065	Q15233	P27361	P45880	P50454	P45880	P60709	P55809	P60900
	Q15056	Q13418		Q07812	Q15257	P27695	P45973	P50502	P45973	P60842	P55957	P60953
	Q15084	Q13449		Q07954	Q15286	P27701	P45974	P50895	P45974	P60866	P56134	P60983
	Q15121	Q13509		Q07955	Q15293	P27797	P46063	P50897	P46108	P60900	P56537	P61019
	Q15149	Q13510		Q07960	Q15334	P27816	P46108	P50914	P46109	P60903	P58546	P61020
	Q15165	Q13642		Q08170	Q15365	P27824	P46109	P50990	P46776	P60953	P59998	P61088
	Q15233	Q13724		Q08211	Q15366	P27913	P46379	P50991	P46777	P60981	P60028	P61106
	Q15287	Q13765		Q08380	Q15369	P27958	P46777	P50993	P46778	P60983	P60033	P61158
	Q15293	Q13813		Q09666	Q15393	P28065	P46778	P51148	P46781	P61019	P60174	P61160
	Q15334	Q13838		Q12765	Q15417	P28066	P46781	P51149	P46782	P61020	P60660	P61163
	Q15365	Q13885		Q12846	Q15424	P28161	P46782	P51178	P46783	P61026	P60709	P61204
	Q15366	Q13938		Q12860	Q15582	P28277	P46783	P51531	P46821	P61077	P60842	P61224
	Q15393	Q14011		Q12905	Q15691	P28289	P46821	P51572	P46937	P61086	P60866	P61247
	Q15417	Q14019		Q12906	Q15717	P28331	P46937	P51608	P46940	P61088	P60891	P61266
	Q15424	Q14103		Q13011	Q15819	P28482	P46940	P51665	P46976	P61106	P60900	P61353
	Q15459	Q14108		Q13148	Q15836	P28676	P46976	P51674	P47755	P61158	P60953	P61586
	Q15691	Q14112		Q13151	Q15907	P28838	P47755	P51858	P47756	P61160	P60981	P61601
	Q15717	Q14118		Q13185	Q16181	P29401	P47756	P51884	P47813	P61163	P60983	P61604
	Q15785	Q14195		Q13200	Q16531	P29590	P48047	P51991	P48047	P61204	P61006	P61916
	Q15836	Q14204		Q13228	Q16543	P29692	P48444	P52209	P48059	P61224	P61019	P61923
	Q16181	Q14254		Q13283	Q16555	P29966	P48637	P52272	P48147	P61247	P61020	P61970
	Q16531	Q14257		Q13449	Q16620	P29972	P48643	P52565	P48431	P61313	P61026	P61978
	Q16543	Q14315		Q13509	Q16629	P29992	P48681	P52566	P48444	P61353	P61077	P61981
	Q16555	Q14344		Q13510	Q16630	P30038	P48735	P52597	P48643	P61586	P61081	P62136
	Q16629	Q14520		Q13526	Q16643	P30040	P49006	P52758	P48681	P61601	P61088	P62140
	Q16630	Q14554		Q13557	Q16658	P30041	P49189	P52907	P48735	P61604	P61106	P62191
	Q16643	Q14624		Q13561	Q16698	P30043	P49321	P52943	P48739	P61626	P61158	P62195
	Q16698	Q14697		Q13642	Q16777	P30044	P49354	P53004	P49006	P61769	P61160	P62241
	Q16777	Q14839		Q13765	Q16836	P30046	P49368	P53396	P49189	P61916	P61163	P62244
	Q16799	Q14974		Q13813	Q16851	P30048	P49411	P53801	P49321	P61970	P61201	P62249
	Q16836	Q14980		Q13838	Q1KMD3	P30049	P49419	P53990	P49327	P61978	P61204	P62258
	Q16891	Q14CZ8		Q13938	Q52LJ0	P30050	P49588	P53999	P49368	P61981	P61224	P62263
	Q1KMD3	Q15019		Q14008	Q53GQ0	P30084	P49590	P54105	P49411	P62081	P61247	P62266
	Q2TAY7	Q15029		Q14011	Q5JTV8	P30085	P49720	P54289	P49419	P62140	P61353	P62269
	Q32MK0	Q15056		Q14103	Q5KU26	P30086	P49721	P54578	P49588	P62191	P61586	P62277
	Q3LXA3	Q15063		Q14108	Q5SSJ5	P30101	P49748	P54652	P49591	P62195	P61601	P62280
	Q49A26	Q15084		Q14112	Q5T1J5	P30153	P49750	P54709	P49720	P62241	P61604	P62304
	Q52LJ0	Q15121		Q14118	Q6IAA8	P30273	P49755	P54725	P49721	P62244	P61758	P62310
	Q53GQ0	Q15149		Q14194	Q6P2Q9	P30307	P49756	P54727	P49748	P62249	P61769	P62316
	Q53GS9	Q15165		Q14195	Q6P4E1	P30414	P49773	P54920	P49750	P62258	P61916	P62318
	Q5BKZ1	Q15185		Q14204	Q6UVY6	P30453	P49821	P55010	P49755	P62263	P61960	P62333
	Q5IJ48	Q15233		Q14240	Q6UXB8	P30479	P49903	P55036	P49773	P62269	P61970	P62424
	Q5JRA6	Q15257		Q14247	Q6UXS0	P30487	P49915	P55058	P49821	P62277	P61978	P62633
	Q5JTJ3	Q15293		Q14257	Q71U36	P30508	P49959	P55060	P49903	P62304	P61981	P62701
	Q5JTV8	Q15334		Q14315	Q7L576	P30533	P50135	P55072	P49913	P62318	P62070	P62753
	Q5SSJ5	Q15363		Q14344	Q7Z4V5	P30626	P50148	P55081	P49915	P62333	P62081	P62760
	Q5TD94	Q15365		Q14444	Q7Z6Z7	P30838	P50150	P55087	P50148	P62424	P62140	P62805
	Q68E01	Q15366		Q14624	Q86UE4	P30876	P50213	P55145	P50213	P62714	P62191	P62820
	Q6IAA8	Q15393		Q14697	Q86UP2	P30929	P50395	P55209	P50395	P62753	P62195	P62826
	Q6P2Q9	Q15417		Q14764	Q86V81	P31040	P50402	P55268	P50402	P62805	P62241	P62834
	Q6P4E1	Q15424		Q14914	Q86VB7	P31146	P50440	P55735	P50454	P62820	P62244	P62847
	Q6UN15	Q15582		Q14974	Q86VP6	P31153	P50453	P55769	P50502	P62826	P62249	P62851
	Q71U36	Q15717		Q14CZ8	Q86Y82	P31689	P50454	P55786	P50570	P62829	P62258	P62857
	Q765P7	Q15836		Q15019	Q8IWA5	P31749	P50502	P55795	P50895	P62834	P62266	P62861
	Q7L576	Q15907		Q15056	Q8IYB3	P31930	P50542	P55884	P50897	P62841	P62269	P62873
	Q7L775	Q16181		Q15063	Q8IYR6	P31937	P50570	P55957	P50914	P62847	P62277	P62879
	Q7Z3B1	Q16270		Q15075	Q8N0U8	P31939	P50579	P56134	P50990	P62851	P62280	P62888
	Q7Z406	Q16363		Q15084	Q8N111	P31942	P50895	P56537	P50991	P62854	P62304	P62899
	Q7Z4V5	Q16543		Q15121	Q8N126	P31946	P50897	P58546	P50993	P62873	P62316	P62910
	Q86UE4	Q16555		Q15149	Q8N163	P31948	P50990	P59998	P51148	P62879	P62318	P62937
	Q86UP2	Q16629		Q15165	Q8N2G4	P31949	P50991	P60028	P51149	P62888	P62333	P62979
	Q86V81	Q16643		Q15181	Q8N3E9	P32119	P50993	P60033	P51178	P62906	P62424	P62993
	Q86VP6	Q16698		Q15185	Q8N6C5	P32455	P50995	P60174	P51452	P62917	P62633	P62995
	Q86WC4	Q16777		Q15233	Q8NBJ4	P32537	P51148	P60468	P51531	P62937	P62701	P63000
	Q86Y82	Q16836		Q15257	Q8NCW5	P33121	P51149	P60660	P51571	P62942	P62745	P63010
	Q8IX01	Q16851		Q15274	Q8NFZ8	P33818	P51178	P60709	P51572	P62979	P62753	P63092
	Q8IYB3	Q16891		Q15286	Q8WWI5	P33819	P51532	P60842	P51608	P62993	P62805	P63104
	Q8N0X7	Q1KMD3		Q15293	Q8WZA0	P34932	P51570	P60866	P51610	P63000	P62820	P63167
	Q8N111	Q53GQ0		Q15363	Q92499	P35052	P51571	P60900	P51648	P63010	P62826	P63172
	Q8N126	Q5JTV8		Q15365	Q92522	P35080	P51572	P60903	P51649	P63092	P62829	P63173
	Q8N163	Q5SSJ5		Q15366	Q92688	P35222	P51608	P60953	P51665	P63104	P62834	P63208
	Q8N1G4	Q6IAA8		Q15369	Q92747	P35232	P51610	P60981	P51674	P63172	P62841	P63215
	Q8N1V2	Q6NZI2		Q15388	Q92752	P35237	P51648	P60983	P51858	P63173	P62847	P63241
	Q8N392	Q6P2Q9		Q15393	Q92820	P35241	P51649	P61019	P51884	P63208	P62851	P63244
	Q8N684	Q6UW68		Q15404	Q92823	P35244	P51659	P61020	P51991	P63241	P62854	P67775
	Q8NBJ4	Q71U36		Q15417	Q92841	P35268	P51665	P61026	P52209	P63244	P62873	P67809
	Q8NBS9	Q7L576		Q15424	Q92896	P35527	P51674	P61077	P52272	P67809	P62879	P67936
	Q8NBX0	Q86UE4		Q15582	Q92945	P35542	P51808	P61088	P52306	P67936	P62888	P68032
	Q8NC56	Q86UP2		Q15631	Q96A26	P35573	P51858	P61106	P52565	P68032	P62899	P68036
	Q8NCW5	Q86UX7		Q15691	Q96AC1	P35579	P51884	P61158	P52566	P68036	P62906	P68104
	Q8NE71	Q86V81		Q15819	Q96AE4	P35580	P51991	P61160	P52597	P68104	P62937	P68363
	Q8NFU3	Q86VB7		Q15836	Q96AG4	P35611	P52209	P61163	P52758	P68363	P62942	P68371
	Q8NFW8	Q86VP6		Q15907	Q96B54	P35612	P52272	P61201	P52907	P68371	P62979	P68400
	Q8NHG7	Q86Y82		Q16181	Q96CN7	P35613	P52306	P61204	P52943	P68400	P62993	P68402
	Q8TAQ2	Q86YZ3		Q16527	Q96CW1	P35637	P52565	P61224	P53004	P68431	P62995	P68871
	Q8TD06	Q8IYB3		Q16543	Q96CX2	P35659	P52566	P61225	P53007	P68871	P63000	P69891
	Q8TEA8	Q8N126		Q16555	Q96DH6	P35749	P52594	P61247	P53618	P69891	P63010	P69892
	Q8TEF2	Q8N6C5		Q16620	Q96E39	P35908	P52597	P61313	P53621	P69905	P63092	P69905
	Q8WVF1	Q8NBJ4		Q16629	Q96FC7	P35971	P52758	P61353	P53999	P78371	P63104	P78347
	Q8WVK2	Q8NBS9		Q16643	Q96FQ6	P35998	P52815	P61586	P54136	P78417	P63167	P78371
	Q8WWI5	Q8NC51		Q16658	Q96FW1	P36269	P52907	P61601	P54577	P80188	P63172	P78504
	Q8WWQ0	Q8NFW8		Q16777	Q96GW7	P36405	P52943	P61604	P54578	P80404	P63173	P78527
	Q8WXF1	Q8TEA8		Q16799	Q96HY6	P36542	P53004	P61626	P54652	P80723	P63208	P80404
	Q8WXX5	Q8WY22		Q16836	Q96KP4	P36578	P53041	P61769	P54709	P83731	P63220	P80723
	Q8WYP5	Q8WZ42		Q16851	Q96PU8	P36714	P53618	P61916	P54725	P83916	P63241	P81605
	Q8WYR4	Q92522		Q1KMD3	Q96QK1	P36720	P53621	P61923	P54727	P84095	P63244	P82970
	Q92522	Q92597		Q53GQ0	Q99460	P36741	P53990	P61960	P54819	P84103	P67775	P82979
	Q92597	Q92688		Q5JTV8	Q99497	P36763	P53992	P61970	P54920	P98160	P67809	P83731
	Q92598	Q92804		Q5KU26	Q99536	P36814	P53999	P61978	P55010	P98179	P67936	P83916
	Q92629	Q92820		Q5SSJ5	Q99613	P36871	P54105	P61981	P55011	Q00169	P68032	P84090
	Q92688	Q92841		Q6IAA8	Q99627	P36957	P54136	P62081	P55036	Q00577	P68036	P84098
	Q92747	Q92896		Q6NZI2	Q99714	P36959	P54289	P62140	P55060	Q00610	P68104	P84103
	Q92804	Q96AC1		Q6UXB8	Q99733	P36969	P54578	P62191	P55072	Q00688	P68363	P84243
	Q92820	Q96AG4		Q71U36	Q99798	P37088	P54652	P62195	P55081	Q00839	P68371	P98160
	Q92841	Q96AQ6		Q765P7	Q99832	P37108	P54709	P62241	P55084	Q01082	P68400	P98172
	Q92896	Q96AY3		Q7L1Q6	Q9BR76	P37235	P54725	P62244	P55087	Q01105	P68402	P98179
	Q92945	Q96E39		Q7L576	Q9BRA2	P37800	P54727	P62249	P55145	Q01469	P68871	Q00059
	Q96A26	Q96GW7		Q7Z3B1	Q9BRX8	P37802	P54803	P62258	P55209	Q01518	P69891	Q00325
	Q96AE4	Q96IY4		Q86UE4	Q9BTT0	P37837	P54819	P62269	P55265	Q01628	P69905	Q00534
	Q96AG4	Q96KP4		Q86UP2	Q9BUT1	P37840	P54920	P62277	P55268	Q01813	P78310	Q00535
	Q96AQ6	Q96QK1		Q86V81	Q9BVA1	P38117	P55010	P62280	P55786	Q01844	P78324	Q00577
	Q96B54	Q99460		Q86VB7	Q9BVK6	P38159	P55036	P62304	P55795	Q01995	P78330	Q00610
	Q96BJ3	Q99536		Q86VP6	Q9BW30	P38606	P55058	P62316	P55957	Q02252	P78347	Q00688
	Q96BM9	Q99623		Q86Y82	Q9BY67	P38646	P55060	P62318	P56134	Q02543	P78371	Q00839
	Q96C74	Q99714		Q8IVF2	Q9H0U4	P38919	P55072	P62333	P56537	Q02878	P78417	Q01082
	Q96EP5	Q99733		Q8IWA5	Q9H299	P39019	P55081	P62424	P58546	Q02952	P78527	Q01085
	Q96FV0	Q99798		Q8N0U8	Q9H361	P39023	P55084	P62701	P60028	Q03252	P78537	Q01105
	Q96GW7	Q99829		Q8N126	Q9H8H3	P39060	P55087	P62745	P60033	Q03405	P80303	Q01469
	Q96HY6	Q99832		Q8N568	Q9HC38	P39656	P55145	P62753	P60174	Q04637	P80404	Q01484
	Q96I24	Q9BS26		Q8N5K1	Q9HDC9	P39687	P55209	P62805	P60201	Q04760	P80723	Q01518
	Q96KP4	Q9BTT0		Q8N6C5	Q9NP72	P40227	P55268	P62820	P60660	Q04826	P82979	Q01813
	Q96PK6	Q9BUT1		Q8N9C0	Q9NQC3	P40261	P55283	P62826	P60709	Q04837	P83731	Q01844
	Q96QK1	Q9BVA1		Q8NFZ8	Q9NQX7	P40429	P55327	P62829	P60842	Q04917	P83916	Q01995
	Q96QV6	Q9BVK6		Q8TCD5	Q9NRX4	P40763	P55735	P62834	P60866	Q04941	P84090	Q02252
	Q99497	Q9BW30		Q8WUM4	Q9NTK5	P40925	P55769	P62841	P60880	Q05682	P84103	Q02790
	Q99536	Q9BWS9		Q8WZA0	Q9NUB1	P40926	P55786	P62847	P60891	Q06033	P84243	Q02818
	Q99627	Q9BY67		Q92522	Q9NVA2	P40939	P55795	P62851	P60900	Q06124	P98172	Q02878
	Q99714	Q9H0U4		Q92597	Q9NWV4	P41091	P55809	P62854	P60903	Q06323	P98179	Q02880
	Q99729	Q9H1E3		Q92598	Q9NX40	P41208	P55884	P62873	P60953	Q06830	P99999	Q02952
	Q99733	Q9H299		Q92599	Q9NZ08	P41218	P55957	P62879	P60981	Q07020	Q00059	Q02978
	Q99798	Q9H4B7		Q92688	Q9NZR1	P41226	P56134	P62888	P60983	Q07021	Q00169	Q03252
	Q99832	Q9H4G4		Q92820	Q9P0L0	P41250	P56537	P62899	P61019	Q07065	Q00577	Q04637
	Q9BRA2	Q9H8H3		Q92823	Q9P0M6	P42126	P56597	P62906	P61026	Q07812	Q00610	Q04760
	Q9BS40	Q9HC38		Q92841	Q9P121	P42167	P58546	P62917	P61077	Q07955	Q00688	Q04837
	Q9BTT0	Q9HDC9		Q92896	Q9P2E9	P42224	P59768	P62937	P61088	Q07960	Q00765	Q04917
	Q9BUJ2	Q9NP72		Q92945	Q9P2K5	P42330	P59998	P62979	P61106	Q08170	Q00796	Q05519
	Q9BUR5	Q9NQ48		Q96A26	Q9P2R7	P42356	P60028	P62993	P61158	Q08211	Q00839	Q05639
	Q9BUT1	Q9NQC3		Q96AG4	Q9UBB4	P42677	P60033	P62995	P61160	Q08257	Q01082	Q05682
	Q9BVA1	Q9NQX7		Q96DH6	Q9UBI6	P42785	P60174	P63000	P61163	Q08380	Q01105	Q06323
	Q9BVK6	Q9NTK5		Q96E39	Q9UBP4	P43003	P60660	P63010	P61204	Q08623	Q01484	Q06830
	Q9BW30	Q9NVA2		Q96FQ6	Q9UBQ7	P43034	P60709	P63092	P61224	Q08722	Q01518	Q07020
	Q9BY67	Q9NYU2		Q96FW1	Q9UD71	P43121	P60842	P63104	P61225	Q09666	Q01813	Q07021
	Q9BZZ5	Q9NZ08		Q96FZ7	Q9UEU0	P43243	P60866	P63167	P61247	Q10588	Q01844	Q07065
	Q9C040	Q9P035		Q96HY6	Q9UEY8	P43307	P60891	P63173	P61313	Q12765	Q01995	Q07666
	Q9H008	Q9P0L0		Q96IU4	Q9UH03	P43487	P60900	P63208	P61353	Q12846	Q02252	Q07812
	Q9H0Q3	Q9P0M6		Q96KP4	Q9UHD8	P43490	P60903	P63220	P61586	Q12860	Q02543	Q07954
	Q9H0U4	Q9P0V9		Q96QK1	Q9UHD9	P43686	P60953	P63241	P61601	Q12905	Q02790	Q07955
	Q9H1E3	Q9P2E9		Q96TA1	Q9UHL4	P45880	P60981	P63244	P61604	Q12906	Q02818	Q07960
	Q9H307	Q9UBG0		Q99497	Q9UHX1	P45973	P60983	P67775	P61626	Q12931	Q02878	Q08170
	Q9H3G5	Q9UBQ7		Q99536	Q9UJ70	P45974	P61019	P67809	P61769	Q13011	Q02952	Q08174
	Q9H3N1	Q9UBS4		Q99613	Q9UJU6	P45984	P61020	P67936	P61916	Q13126	Q03252	Q08211
	Q9H3Q1	Q9UBX5		Q99623	Q9UK22	P46059	P61077	P68032	P61923	Q13185	Q04760	Q08257
	Q9H3Z4	Q9UD71		Q99627	Q9UKV3	P46108	P61081	P68036	P61960	Q13200	Q04917	Q08945
	Q9H425	Q9UHD8		Q99714	Q9UL46	P46109	P61086	P68104	P61964	Q13228	Q04941	Q09028
	Q9H4A4	Q9UHL4		Q99733	Q9ULC3	P46439	P61088	P68363	P61978	Q13263	Q05682	Q09666
	Q9H7X7	Q9UJU6		Q99798	Q9UMS4	P46734	P61106	P68371	P61981	Q13283	Q06124	Q12765
	Q9H8H3	Q9UJZ1		Q99832	Q9UN36	P46776	P61158	P68400	P62070	Q13409	Q06323	Q12769
	Q9HB40	Q9ULV4		Q99961	Q9UNF0	P46777	P61160	P68402	P62081	Q13449	Q06481	Q12800
	Q9HB71	Q9UMS4		Q99962	Q9UNK0	P46781	P61163	P68431	P62136	Q13509	Q06830	Q12846
	Q9HCC8	Q9UN36		Q9BRA2	Q9UNM6	P46782	P61201	P68871	P62140	Q13510	Q07020	Q12874
	Q9HDC9	Q9UNZ2		Q9BRX8	Q9UNZ2	P46783	P61204	P69892	P62191	Q13526	Q07021	Q12888
	Q9NP72	Q9Y230		Q9BTT0	Q9UQB3	P46821	P61224	P69905	P62195	Q13561	Q07065	Q12905
	Q9NQ29	Q9Y265		Q9BUT1	Q9Y224	P46939	P61247	P78310	P62241	Q13596	Q07666	Q12906
	Q9NQ48	Q9Y277		Q9BVA1	Q9Y230	P46940	P61353	P78324	P62244	Q13630	Q07812	Q12907
	Q9NQC3	Q9Y2J2		Q9BVK6	Q9Y265	P47755	P61457	P78347	P62249	Q13642	Q07954	Q13011
	Q9NQG5	Q9Y2W1		Q9BW30	Q9Y266	P47756	P61586	P78371	P62256	Q13765	Q07955	Q13057
	Q9NRX4	Q9Y2X3		Q9BY67	Q9Y277	P47897	P61601	P78417	P62258	Q13813	Q07960	Q13123
	Q9NS86	Q9Y3B3		Q9H008	Q9Y2J2	P47985	P61604	P78527	P62263	Q13838	Q08170	Q13148
	Q9NUJ1	Q9Y3E1		Q9H0R4	Q9Y2J8	P48047	P61764	P78559	P62266	Q13885	Q08211	Q13151
	Q9NVA2	Q9Y3U8		Q9H0U4	Q9Y2S2	P48147	P61916	P80188	P62269	Q13938	Q08380	Q13177
	Q9NX40	Q9Y3Z3		Q9H299	Q9Y383	P48444	P61923	P80723	P62277	Q14011	Q09028	Q13185
	Q9NYB0	Q9Y490		Q9H3N1	Q9Y3E7	P48506	P61960	P81605	P62280	Q14019	Q09666	Q13200
	Q9NYF8	Q9Y4L1		Q9H425	Q9Y3I0	P48509	P61970	P83731	P62314	Q14103	Q10567	Q13228
	Q9NZ45	Q9Y5B9		Q9H4G4	Q9Y3U8	P48634	P61978	P84098	P62316	Q14108	Q12765	Q13232
	Q9NZR1	Q9Y617		Q9H8H3	Q9Y490	P48643	P61981	P84103	P62318	Q14112	Q12805	Q13242
	Q9P0L0	Q9Y624		Q9HC38	Q9Y4F1	P48681	P62070	P84243	P62333	Q14118	Q12846	Q13243
	Q9P0M6	Q9Y639		Q9HDC9	Q9Y5Z4	P48729	P62081	P98095	P62424	Q14152	Q12849	Q13247
	Q9P0V9	Q9Y696		Q9NP72	Q9Y617	P48735	P62136	P98160	P62633	Q14194	Q12860	Q13263
	Q9P2E9			Q9NP97	Q9Y639	P48736	P62140	P98172	P62701	Q14195	Q12874	Q13283
	Q9P2K5			Q9NQ48	Q9Y696	P49184	P62191	Q00059	P62745	Q14204	Q12904	Q13308
	Q9UBI6			Q9NQC3	Q9Y6R1	P49189	P62195	Q00169	P62750	Q14257	Q12905	Q13330
	Q9UBK7			Q9NRX4	Q9Y6R7	P49368	P62241	Q00325	P62753	Q14315	Q12906	Q13363
	Q9UBQ7			Q9NTK5		P49411	P62244	Q00577	P62805	Q14444	Q12931	Q13409
	Q9UBX5			Q9NVD7		P49419	P62249	Q00610	P62826	Q14515	Q13011	Q13423
	Q9UD71			Q9NX63		P49454	P62256	Q00688	P62829	Q14624	Q13057	Q13428
	Q9UDT6			Q9NYL9		P49458	P62258	Q00839	P62834	Q14697	Q13098	Q13435
	Q9UEY8			Q9NZR1		P49720	P62266	Q01082	P62847	Q14764	Q13126	Q13442
	Q9UHA4			Q9P0L0		P49721	P62269	Q01105	P62851	Q14974	Q13148	Q13449
	Q9UHD8			Q9P121		P49748	P62277	Q01469	P62854	Q14CZ8	Q13151	Q13509
	Q9UHL4			Q9P2E9		P49755	P62304	Q01518	P62873	Q15006	Q13185	Q13510
	Q9UHQ9			Q9UBI6		P49756	P62310	Q01628	P62879	Q15019	Q13200	Q13523
	Q9UHX1			Q9UBQ7		P49796	P62314	Q01813	P62888	Q15043	Q13217	Q13526
	Q9UI15			Q9UBX5		P49908	P62316	Q01844	P62906	Q15056	Q13228	Q13561
	Q9UJU6			Q9UEY8		P49910	P62318	Q01995	P62917	Q15075	Q13243	Q13576
	Q9UJZ1			Q9UFN0		P49913	P62330	Q02543	P62937	Q15084	Q13263	Q13595
	Q9UK22			Q9UHD8		P49917	P62333	Q02809	P62979	Q15121	Q13283	Q13596
	Q9UKM9			Q9UHD9		P49959	P62424	Q02878	P62993	Q15149	Q13404	Q13642
	Q9UKV3			Q9UHG3		P50213	P62495	Q02880	P62995	Q15165	Q13409	Q13724
	Q9UL46			Q9UHL4		P50226	P62633	Q02952	P63000	Q15181	Q13424	Q13765
	Q9UMS4			Q9UHX1		P50395	P62701	Q03135	P63010	Q15185	Q13428	Q13813
	Q9UMX5			Q9UHY7		P50402	P62745	Q03252	P63027	Q15233	Q13435	Q13838
	Q9UN36			Q9UJ70		P50440	P62750	Q04695	P63092	Q15257	Q13442	Q13885
	Q9UNF0			Q9UJU6		P50454	P62753	Q04760	P63104	Q15274	Q13449	Q13938
	Q9UNK0			Q9UJZ1		P50502	P62760	Q04837	P63167	Q15293	Q13509	Q14008
	Q9UNZ2			Q9UK22		P50748	P62805	Q04917	P63172	Q15363	Q13510	Q14011
	Q9UPY8			Q9UKK9		P50760	P62820	Q04941	P63208	Q15365	Q13526	Q14103
	Q9UQ35			Q9UL46		P50764	P62826	Q05519	P63220	Q15366	Q13555	Q14108
	Q9UQ80			Q9UN36		P50767	P62829	Q05682	P63241	Q15369	Q13557	Q14112
	Q9UQE7			Q9UNF0		P50768	P62834	Q06033	P63244	Q15370	Q13561	Q14118
	Q9Y224			Q9Y230		P50789	P62841	Q06323	P67775	Q15393	Q13596	Q14151
	Q9Y230			Q9Y265		P50897	P62847	Q06830	P67809	Q15417	Q13630	Q14152
	Q9Y265			Q9Y277		P50914	P62851	Q07020	P67936	Q15427	Q13636	Q14157
	Q9Y266			Q9Y281		P50990	P62854	Q07021	P68032	Q15435	Q13641	Q14165
	Q9Y277			Q9Y2J2		P50991	P62873	Q07065	P68036	Q15459	Q13642	Q14194
	Q9Y281			Q9Y2J8		P50993	P62879	Q07666	P68104	Q15582	Q13765	Q14195
	Q9Y2B0			Q9Y2S2		P50995	P62888	Q07812	P68363	Q15631	Q13813	Q14204
	Q9Y2J2			Q9Y383		P51148	P62899	Q07954	P68371	Q15691	Q13838	Q14247
	Q9Y2W1			Q9Y3A6		P51149	P62906	Q07955	P68400	Q15717	Q13885	Q14254
	Q9Y2W2			Q9Y3B3		P51157	P62910	Q07960	P68402	Q15746	Q13938	Q14257
	Q9Y383			Q9Y3I0		P51178	P62937	Q08170	P68871	Q15782	Q14011	Q14344
	Q9Y3B3			Q9Y3U8		P51571	P62979	Q08211	P69891	Q15819	Q14019	Q14353
	Q9Y3C8			Q9Y490		P51572	P62993	Q08257	P69905	Q15836	Q14103	Q14444
	Q9Y3I0			Q9Y4F1		P51608	P62995	Q08380	P78324	Q15907	Q14108	Q14498
	Q9Y3U8			Q9Y4G6		P51648	P63000	Q08945	P78347	Q16181	Q14118	Q14515
	Q9Y490			Q9Y4L1		P51659	P63010	Q09666	P78371	Q16270	Q14157	Q14576
	Q9Y4L1			Q9Y5Z4		P51665	P63092	Q10588	P78406	Q16543	Q14160	Q14683
	Q9Y5B9			Q9Y617		P51674	P63104	Q12765	P78527	Q16555	Q14194	Q14697
	Q9Y5S9			Q9Y639		P51787	P63151	Q12797	P78559	Q16620	Q14195	Q14739
	Q9Y617			Q9Y696		P51858	P63167	Q12846	P80188	Q16629	Q14204	Q14839
	Q9Y624					P51884	P63172	Q12860	P80297	Q16643	Q14247	Q14847
	Q9Y639					P51970	P63173	Q12874	P80404	Q16678	Q14257	Q14938
	Q9Y6X4					P51991	P63208	Q12888	P80723	Q16698	Q14344	Q14966
						P52209	P63220	Q12904	P82970	Q16777	Q14353	Q14974
						P52272	P63241	Q12905	P82979	Q16799	Q14444	Q14978
						P52340	P63244	Q12906	P83731	Q16836	Q14498	Q14980
						P52343	P67775	Q12907	P83916	Q16851	Q14515	Q14CZ8
						P52356	P67809	Q13011	P84085	Q16891	Q14558	Q15019
						P52362	P67812	Q13098	P84090	Q1KMD3	Q14683	Q15029
						P52438	P67936	Q13126	P84095	Q2TAA2	Q14696	Q15049
						P52451	P68032	Q13148	P84103	Q52LJ0	Q14697	Q15056
						P52458	P68036	Q13151	P84243	Q5KU26	Q14847	Q15084
						P52565	P68104	Q13162	P98095	Q5SSJ5	Q14914	Q15102
						P52566	P68363	Q13177	P98160	Q5T8D3	Q14974	Q15121
						P52597	P68371	Q13185	P98172	Q5XKP0	Q14978	Q15126
						P52815	P68400	Q13200	Q00059	Q674X7	Q14980	Q15149
						P52907	P68402	Q13228	Q00169	Q6IAA8	Q14CZ8	Q15165
						P52943	P68431	Q13263	Q00325	Q6IBS0	Q15006	Q15181
						P53007	P68871	Q13283	Q00577	Q6NZI2	Q15019	Q15185
						P53041	P69905	Q13363	Q00610	Q6P4A8	Q15029	Q15233
						P53618	P78324	Q13404	Q00688	Q6UW68	Q15041	Q15257
						P53621	P78330	Q13409	Q00839	Q6UX06	Q15056	Q15287
						P53680	P78344	Q13435	Q01082	Q6UXB8	Q15084	Q15293
						P53801	P78347	Q13449	Q01085	Q6YN16	Q15102	Q15334
						P53990	P78356	Q13491	Q01105	Q70UQ0	Q15121	Q15365
						P54105	P78371	Q13509	Q01469	Q71U36	Q15124	Q15366
						P54136	P78417	Q13510	Q01518	Q765P7	Q15149	Q15369
						P54578	P78527	Q13526	Q01628	Q7KZF4	Q15165	Q15370
						P54652	P78559	Q13561	Q01813	Q7L1Q6	Q15181	Q15388
						P54709	P80303	Q13595	Q01844	Q7L576	Q15185	Q15393
						P54727	P80404	Q13618	Q01974	Q86UE4	Q15233	Q15417
						P54793	P80723	Q13630	Q01995	Q86UP2	Q15257	Q15424
						P54819	P82979	Q13642	Q02252	Q86UX7	Q15293	Q15427
						P54920	P83731	Q13740	Q02543	Q86V81	Q15334	Q15459
						P54922	P83916	Q13765	Q02790	Q86VB7	Q15363	Q15582
						P55010	P84022	Q13813	Q02809	Q86VP6	Q15365	Q15631
						P55036	P84085	Q13838	Q02818	Q86Y82	Q15366	Q15691
						P55060	P84090	Q13867	Q02878	Q8IVF2	Q15369	Q15717
						P55072	P84095	Q13885	Q02880	Q8IWA5	Q15370	Q15819
						P55083	P84103	Q13938	Q02952	Q8IX19	Q15382	Q15836
						P55084	P84243	Q14011	Q03135	Q8N0U8	Q15393	Q15907
						P55087	P98172	Q14019	Q03252	Q8N126	Q15417	Q16181
						P55145	P98179	Q14103	Q04637	Q8N163	Q15424	Q16270
						P55196	P99999	Q14108	Q04760	Q8N2G4	Q15427	Q16531
						P55209	Q00059	Q14112	Q04837	Q8N684	Q15435	Q16543
						P55263	Q00325	Q14118	Q04917	Q8N6C5	Q15459	Q16555
						P55268	Q00577	Q14152	Q05519	Q8N8S7	Q15582	Q16629
						P55735	Q00610	Q14165	Q05682	Q8NBJ4	Q15631	Q16630
						P55769	Q00688	Q14194	Q06323	Q8NBX0	Q15637	Q16643
						P55786	Q00765	Q14195	Q06830	Q8NC51	Q15691	Q16658
						P55795	Q00796	Q14204	Q07020	Q8TAQ2	Q15717	Q16698
						P56134	Q00839	Q14247	Q07021	Q8TCD5	Q15785	Q16777
						P56537	Q01082	Q14254	Q07065	Q8WUM4	Q15811	Q16799
						P56945	Q01085	Q14257	Q07157	Q8WWW8	Q15819	Q16836
						P57088	Q01105	Q14315	Q07666	Q8WXX5	Q15836	Q16881
						P57105	Q01469	Q14344	Q07812	Q8WZA0	Q15843	Q16891
						P58107	Q01484	Q14444	Q07954	Q92522	Q15907	Q1KMD3
						P58546	Q01518	Q14515	Q07955	Q92597	Q16181	Q2TAA2
						P59510	Q01844	Q14554	Q07960	Q92599	Q16186	Q2TAY7
						P59998	Q01995	Q14624	Q08170	Q92688	Q16527	Q49A26
						P60028	Q02252	Q14683	Q08211	Q92734	Q16531	Q52LJ0
						P60033	Q02543	Q14697	Q08257	Q92804	Q16543	Q53EL6
						P60174	Q02790	Q14764	Q08380	Q92820	Q16555	Q53GS9
						P60468	Q02818	Q14839	Q08945	Q92823	Q16625	Q587I9
						P60520	Q02878	Q14847	Q09028	Q92841	Q16629	Q5H9L2
						P60660	Q02880	Q14938	Q09666	Q92882	Q16630	Q5JSH3
						P60709	Q03252	Q14974	Q10567	Q92896	Q16643	Q5JTV8
						P60842	Q04323	Q14978	Q12765	Q92945	Q16658	Q5SSJ5
						P60891	Q04637	Q14980	Q12792	Q92947	Q16698	Q5SW79
						P60900	Q04760	Q14CZ8	Q12797	Q92973	Q16718	Q5T1J5
						P60903	Q04837	Q15019	Q12846	Q96A26	Q16762	Q5T8D3
						P60953	Q04917	Q15029	Q12860	Q96AC1	Q16777	Q5T8P6
						P60981	Q05048	Q15043	Q12874	Q96AE4	Q16799	Q5VTL8
						P60983	Q05519	Q15049	Q12888	Q96AG4	Q16836	Q66PJ3
						P61006	Q05682	Q15056	Q12904	Q96AQ6	Q16851	Q6IAA8
						P61009	Q06124	Q15067	Q12905	Q96C19	Q16881	Q6NZI2
						P61019	Q06323	Q15075	Q12906	Q96CN7	Q1KMD3	Q6P2Q9
						P61020	Q06830	Q15084	Q12907	Q96CW1	Q2TAA2	Q6P4E1
						P61026	Q07020	Q15102	Q13011	Q96CX2	Q3LXA3	Q6P587
						P61077	Q07021	Q15121	Q13126	Q96E39	Q4G0N4	Q6UN15
						P61088	Q07065	Q15149	Q13148	Q96FQ6	Q52LJ0	Q71U36
						P61106	Q07157	Q15165	Q13151	Q96FW1	Q53EL6	Q765P7
						P61158	Q07617	Q15181	Q13162	Q96FZ7	Q53GS9	Q7L014
						P61160	Q07666	Q15185	Q13177	Q96G03	Q5H9L2	Q7L099
						P61163	Q07812	Q15233	Q13185	Q96GW7	Q5JSH3	Q7L1Q6
						P61204	Q07954	Q15257	Q13200	Q96HE7	Q5JTV8	Q7L4I2
						P61224	Q07955	Q15274	Q13228	Q96HY6	Q5KU26	Q7L576
						P61225	Q07960	Q15286	Q13263	Q96KP4	Q5SSJ5	Q7L5N1
						P61244	Q08170	Q15293	Q13283	Q96PD5	Q5T1J5	Q7L775
						P61247	Q08211	Q15334	Q13363	Q96PU8	Q66K74	Q7RTV0
						P61266	Q08257	Q15363	Q13404	Q96QK1	Q6DKJ4	Q7Z3B1
						P61313	Q08380	Q15365	Q13409	Q96QR8	Q6NVY1	Q7Z3K3
						P61457	Q08462	Q15366	Q13423	Q96TA1	Q6NZI2	Q7Z417
						P61586	Q08623	Q15369	Q13424	Q99497	Q6P2Q9	Q7Z460
						P61604	Q08752	Q15370	Q13435	Q99536	Q6P4E1	Q7Z4V5
						P61769	Q08945	Q15393	Q13442	Q99613	Q6UN15	Q7Z4W1
						P61916	Q09028	Q15417	Q13449	Q99614	Q6UXB8	Q7Z7H5
						P61956	Q09161	Q15424	Q13491	Q99623	Q6Y288	Q86SX6
						P61960	Q09666	Q15435	Q13492	Q99627	Q6ZVM7	Q86U28
						P61978	Q10570	Q15459	Q13509	Q99714	Q71U36	Q86U42
						P61981	Q12765	Q15582	Q13510	Q99729	Q7KZF4	Q86UE4
						P62081	Q12792	Q15631	Q13526	Q99733	Q7L1Q6	Q86UP2
						P62140	Q12800	Q15691	Q13561	Q99798	Q7L266	Q86V81
						P62191	Q12824	Q15717	Q13564	Q99829	Q7L576	Q86VB7
						P62195	Q12846	Q15782	Q13576	Q99832	Q7L5N1	Q86VP6
						P62241	Q12860	Q15819	Q13596	Q99961	Q7Z417	Q86W42
						P62244	Q12874	Q15836	Q13630	Q9BPU6	Q7Z434	Q86Y82
						P62249	Q12888	Q15907	Q13642	Q9BPX5	Q7Z4V5	Q86YR5
						P62258	Q12904	Q16181	Q13724	Q9BQE5	Q7Z4W1	Q8IWA5
						P62266	Q12905	Q16401	Q13813	Q9BRA2	Q7Z6K5	Q8IWX8
						P62269	Q12906	Q16527	Q13838	Q9BS26	Q7Z7K6	Q8IX01
						P62277	Q12931	Q16531	Q13885	Q9BT78	Q86SX6	Q8IX12
						P62304	Q12996	Q16543	Q13938	Q9BTT0	Q86UE4	Q8IXT5
						P62306	Q13011	Q16555	Q14008	Q9BUL8	Q86UP2	Q8IYB3
						P62308	Q13057	Q16576	Q14011	Q9BUT1	Q86V81	Q8IZP0
						P62310	Q13098	Q16620	Q14103	Q9BV40	Q86VP6	Q8N0U8
						P62318	Q13123	Q16629	Q14108	Q9BVA1	Q86Y82	Q8N111
						P62330	Q13126	Q16630	Q14112	Q9BVK6	Q8IVF2	Q8N126
						P62333	Q13148	Q16643	Q14118	Q9BW30	Q8IW45	Q8N128
						P62424	Q13151	Q16698	Q14152	Q9BWD1	Q8IWA5	Q8N163
						P62495	Q13153	Q16799	Q14157	Q9BX66	Q8IYK4	Q8N1G4
						P62701	Q13155	Q16836	Q14160	Q9BY43	Q8IZP0	Q8N568
						P62714	Q13162	Q16851	Q14165	Q9BY67	Q8N0U8	Q8N5K1
						P62745	Q13185	Q16881	Q14194	Q9BZZ5	Q8N0X4	Q8N684
						P62750	Q13200	Q16891	Q14195	Q9C0E8	Q8N111	Q8N6H7
						P62753	Q13217	Q1KMD3	Q14203	Q9H008	Q8N126	Q8N8S7
						P62805	Q13228	Q2TAA2	Q14204	Q9H0R4	Q8N163	Q8NBI3
						P62820	Q13242	Q49A26	Q14247	Q9H0U4	Q8N1G4	Q8NBJ4
						P62826	Q13243	Q52LJ0	Q14254	Q9H299	Q8N3E9	Q8NBX0
						P62829	Q13247	Q53GQ0	Q14257	Q9H3G5	Q8N3F0	Q8NC51
						P62834	Q13263	Q53GS9	Q14315	Q9H444	Q8N4V1	Q8NC56
						P62847	Q13283	Q5D862	Q14344	Q9H4G4	Q8N568	Q8NCW5
						P62851	Q13308	Q5JTV8	Q14353	Q9H4M9	Q8N5K1	Q8NF37
						P62854	Q13325	Q5KU26	Q14444	Q9HAT2	Q8N6N7	Q8NFW8
						P62857	Q13330	Q5SSJ5	Q14498	Q9HC38	Q8N7J2	Q8NI99
						P62873	Q13404	Q68DU8	Q14515	Q9HD89	Q8N8N7	Q8TAQ2
						P62879	Q13409	Q6IAA8	Q14554	Q9HDC9	Q8N8S7	Q8TC12
						P62888	Q13418	Q6NZI2	Q14624	Q9NP72	Q8N9N7	Q8TEA8
						P62906	Q13427	Q6P2Q9	Q14697	Q9NQ48	Q8NBJ4	Q8TEM1
						P62913	Q13428	Q6UN15	Q14699	Q9NQC3	Q8NBS9	Q8WVC0
						P62937	Q13435	Q6UVY6	Q14739	Q9NQX7	Q8NC51	Q8WVK2
						P62979	Q13442	Q6UXB8	Q14764	Q9NR31	Q8NCW5	Q8WVZ9
						P62993	Q13443	Q6UXS0	Q14839	Q9NR45	Q8NFW8	Q8WWQ0
						P62995	Q13445	Q6Y288	Q14847	Q9NR46	Q8NI22	Q8WWY3
						P63000	Q13449	Q6YHK3	Q14914	Q9NRX4	Q8TCD5	Q8WXA9
						P63010	Q13492	Q71U36	Q14938	Q9NS69	Q8TDQ7	Q8WXF1
						P63096	Q13510	Q76MJ5	Q14974	Q9NTK5	Q8TEA8	Q8WXI9
						P63104	Q13523	Q7L576	Q14978	Q9NUQ9	Q8TEU8	Q8WXX5
						P63151	Q13526	Q7L5N1	Q14980	Q9NWV4	Q8WUM4	Q8WY22
						P63162	Q13555	Q7L775	Q14CZ8	Q9NX40	Q8WVJ2	Q92499
						P63167	Q13561	Q7Z4V5	Q15005	Q9NX63	Q8WWY3	Q92520
						P63172	Q13576	Q86UE4	Q15019	Q9NY33	Q8WXF1	Q92522
						P63208	Q13595	Q86UP2	Q15029	Q9NYL9	Q8WXX5	Q92542
						P63241	Q13596	Q86V81	Q15056	Q9NZR1	Q8WZA0	Q92575
						P63244	Q13618	Q86VB7	Q15075	Q9NZZ3	Q92499	Q92598
						P67870	Q13630	Q86VP6	Q15084	Q9P0L0	Q92520	Q92688
						P67936	Q13641	Q86Y82	Q15121	Q9P0V9	Q92522	Q92733
						P68032	Q13642	Q8IVF2	Q15149	Q9P121	Q92530	Q92734
						P68036	Q13740	Q8IWA5	Q15165	Q9P2E9	Q92575	Q92747
						P68335	Q13765	Q8IYB3	Q15181	Q9UBI6	Q92597	Q92769
						P68363	Q13769	Q8N0U8	Q15185	Q9UBQ0	Q92598	Q92783
						P68371	Q13813	Q8N126	Q15233	Q9UBQ5	Q92599	Q92804
						P68402	Q13838	Q8N163	Q15257	Q9UBQ7	Q92665	Q92820
						P68614	Q13938	Q8N6C5	Q15286	Q9UBS4	Q92688	Q92823
						P68624	Q14008	Q8N8S7	Q15293	Q9UD71	Q92734	Q92841
						P68871	Q14011	Q8NBJ4	Q15334	Q9UEU0	Q92747	Q92896
						P69891	Q14019	Q8NBS9	Q15363	Q9UEY8	Q92783	Q92945
						P69892	Q14103	Q8NCW5	Q15365	Q9UFN0	Q92804	Q92973
						P69905	Q14108	Q8NFW8	Q15366	Q9UGT4	Q92820	Q93009
						P78324	Q14112	Q8NFZ8	Q15369	Q9UH03	Q92823	Q969E4
						P78347	Q14118	Q8TAQ2	Q15370	Q9UHD8	Q92841	Q969G3
						P78371	Q14151	Q8TBC4	Q15393	Q9UHL4	Q92896	Q969H8
						P78424	Q14152	Q8TEA8	Q15417	Q9UHV9	Q92945	Q96A26
						P78527	Q14157	Q8WWI5	Q15424	Q9UHX1	Q969E4	Q96AE4
						P78559	Q14160	Q8WXF1	Q15427	Q9UHY7	Q969G3	Q96AG4
						P80303	Q14165	Q8WXX5	Q15435	Q9UIJ7	Q969H8	Q96AQ6
						P80404	Q14195	Q8WZA0	Q15459	Q9UJ70	Q969X5	Q96AY3
						P80723	Q14204	Q92499	Q15582	Q9UJU6	Q96A26	Q96B54
						P81605	Q14240	Q92522	Q15599	Q9UJZ1	Q96AC1	Q96CN7
						P82664	Q14247	Q92542	Q15631	Q9UK22	Q96AE4	Q96CT7
						P83731	Q14257	Q92597	Q15637	Q9UK41	Q96AG4	Q96CX2
						P83916	Q14258	Q92598	Q15691	Q9UL25	Q96AQ6	Q96DH6
						P84090	Q14315	Q92599	Q15717	Q9UL46	Q96B54	Q96DI7
						P84095	Q14344	Q92688	Q15746	Q9ULA0	Q96C23	Q96EP5
						P84098	Q14353	Q92734	Q15836	Q9ULC3	Q96CN7	Q96FC7
						P84103	Q14444	Q92747	Q15907	Q9ULZ3	Q96CT7	Q96FN4
						P84243	Q14498	Q92804	Q15942	Q9UM07	Q96CX2	Q96FW1
						P89462	Q14554	Q92820	Q16181	Q9UN36	Q96DE0	Q96G03
						P98160	Q14624	Q92823	Q16270	Q9UNF0	Q96DH6	Q96GW7
						P98164	Q14683	Q92841	Q16363	Q9UNK0	Q96EQ0	Q96HY6
						Q00169	Q14697	Q92859	Q16527	Q9UNM6	Q96F85	Q96I24
						Q00325	Q147U7	Q92896	Q16531	Q9UNZ2	Q96FJ2	Q96IZ7
						Q00577	Q14839	Q92945	Q16543	Q9UQ80	Q96FQ6	Q96JM3
						Q00610	Q14938	Q92973	Q16555	Q9Y230	Q96FW1	Q96K17
						Q00765	Q14966	Q969G3	Q16620	Q9Y265	Q96G03	Q96K83
						Q00839	Q14974	Q969H8	Q16629	Q9Y266	Q96GK7	Q96KP4
						Q00887	Q14978	Q96A26	Q16630	Q9Y277	Q96GW7	Q96ME7
						Q01082	Q14980	Q96A33	Q16643	Q9Y281	Q96HR9	Q96PK6
						Q01105	Q14CZ8	Q96AB3	Q16658	Q9Y2B0	Q96HY6	Q96PQ0
						Q01130	Q15005	Q96AC1	Q16666	Q9Y2J2	Q96I24	Q96PU8
						Q01469	Q15006	Q96AG4	Q16698	Q9Y2J8	Q96IU4	Q96QK1
						Q01484	Q15008	Q96AQ6	Q16777	Q9Y2W1	Q96KP4	Q96QR8
						Q01518	Q15019	Q96AY3	Q16799	Q9Y371	Q96P16	Q96RT1
						Q01668	Q15020	Q96B54	Q16836	Q9Y376	Q96PU8	Q96ST2
						Q01813	Q15029	Q96CN7	Q16851	Q9Y383	Q96RF0	Q96T23
						Q01844	Q15041	Q96CT7	Q16881	Q9Y3B3	Q96RT1	Q99459
						Q01995	Q15049	Q96CW1	Q16891	Q9Y3E7	Q96ST2	Q99460
						Q02040	Q15054	Q96CX2	Q1KMD3	Q9Y3F4	Q99426	Q99496
						Q02153	Q15056	Q96FC7	Q49A26	Q9Y3I0	Q99436	Q99497
						Q02252	Q15059	Q96FW1	Q4G0N4	Q9Y3U8	Q99439	Q99536
						Q02338	Q15075	Q96FZ7	Q52LJ0	Q9Y490	Q99460	Q99613
						Q02543	Q15084	Q96G03	Q53GQ0	Q9Y4E1	Q99471	Q99623
						Q02818	Q15102	Q96GW7	Q53GS9	Q9Y4L1	Q99497	Q99627
						Q02878	Q15121	Q96HE7	Q5EBL8	Q9Y5K8	Q99536	Q99714
						Q02880	Q15124	Q96HY6	Q5JSH3	Q9Y5S9	Q99598	Q99729
						Q02930	Q15149	Q96I24	Q5JTV8	Q9Y5X3	Q99614	Q99733
						Q02952	Q15165	Q96KK5	Q5KU26	Q9Y5Z4	Q99615	Q99798
						Q02978	Q15166	Q96KP4	Q5SSJ5	Q9Y617	Q99627	Q99832
						Q03135	Q15181	Q96ME7	Q5T1J5	Q9Y639	Q99653	Q99873
						Q03252	Q15185	Q96PD5	Q641Q2	Q9Y696	Q99714	Q9BQI0
						Q03938	Q15233	Q96PK6	Q674X7	Q9Y6R7	Q99719	Q9BR76
						Q04727	Q15257	Q96PU8	Q6IAA8		Q99729	Q9BRA2
						Q04760	Q15286	Q96QK1	Q6NZI2		Q99733	Q9BRJ7
						Q04837	Q15287	Q96QR8	Q6P2Q9		Q99747	Q9BRK5
						Q04917	Q15293	Q99436	Q6P4E1		Q99798	Q9BRX8
						Q04941	Q15334	Q99460	Q6P587		Q99829	Q9BSJ8
						Q05193	Q15363	Q99497	Q6UN15		Q99832	Q9BTT0
						Q05496	Q15365	Q99536	Q6UVK1		Q99943	Q9BTV4
						Q05519	Q15366	Q99598	Q6UW68		Q99961	Q9BUH6
						Q06033	Q15369	Q99623	Q6UXB8		Q9BPU6	Q9BUJ2
						Q06323	Q15370	Q99627	Q6YHK3		Q9BQE5	Q9BUR5
						Q06481	Q15382	Q99714	Q6ZMP0		Q9BQI0	Q9BVA1
						Q06495	Q15393	Q99729	Q71U36		Q9BRA2	Q9BVG4
						Q06830	Q15417	Q99733	Q765P7		Q9BRJ6	Q9BVK6
						Q07020	Q15424	Q99798	Q7KZF4		Q9BRT3	Q9BW30
						Q07021	Q15427	Q99832	Q7L266		Q9BS26	Q9BXK5
						Q07065	Q15435	Q99873	Q7L576		Q9BTT0	Q9BXP5
						Q07283	Q15436	Q99961	Q7L7X3		Q9BUJ2	Q9BY67
						Q07666	Q15459	Q9BPU6	Q7RTV0		Q9BUL8	Q9BZZ5
						Q07812	Q15506	Q9BPX5	Q7Z4V5		Q9BUT1	Q9C0E8
						Q07954	Q15555	Q9BS26	Q7Z6Z7		Q9BVA1	Q9GZT3
						Q07955	Q15631	Q9BTT0	Q86U42		Q9BVK6	Q9H0Q3
						Q07960	Q15637	Q9BTV4	Q86UE4		Q9BW30	Q9H0U4
						Q08089	Q15691	Q9BUF5	Q86UP2		Q9BWD1	Q9H1E3
						Q08170	Q15717	Q9BUH6	Q86V81		Q9BWS9	Q9H1E5
						Q08211	Q15785	Q9BUJ2	Q86VB7		Q9BX66	Q9H299
						Q08257	Q15836	Q9BUL8	Q86VP6		Q9BXK5	Q9H307
						Q08380	Q15907	Q9BUR5	Q86Y82		Q9BXP5	Q9H3N1
						Q08722	Q16181	Q9BUT1	Q86YR5		Q9BXW6	Q9H3Q1
						Q08945	Q16186	Q9BVA1	Q8IVF2		Q9BY43	Q9H479
						Q08J23	Q16270	Q9BVK6	Q8IWA5		Q9BZZ5	Q9H4A4
						Q09666	Q16401	Q9BW30	Q8IWI9		Q9C0B1	Q9H4G4
						Q0HD53	Q16531	Q9BWD1	Q8IX12		Q9GZT4	Q9H6Z4
						Q0VDD8	Q16537	Q9BWS9	Q8IYB3		Q9H008	Q9H8H3
						Q0VGE8	Q16543	Q9BY67	Q8IZP0		Q9H074	Q9H8Y8
						Q10567	Q16555	Q9BZZ5	Q8N0U8		Q9H0E2	Q9H9B4
						Q10588	Q16576	Q9GZP4	Q8N126		Q9H0R4	Q9HB71
						Q10589	Q16625	Q9H0R4	Q8N163		Q9H0W9	Q9HC38
						Q11201	Q16629	Q9H0U4	Q8N1G4		Q9H1E3	Q9HC78
						Q12765	Q16630	Q9H299	Q8N6C5		Q9H2H8	Q9HCD5
						Q12797	Q16643	Q9H307	Q8N8S7		Q9H2U2	Q9HDC9
						Q12805	Q16658	Q9H3N1	Q8NBJ4		Q9H307	Q9NP66
						Q12846	Q16698	Q9H3Q1	Q8NBS9		Q9H3N1	Q9NP72
						Q12852	Q16762	Q9H3Z4	Q8NBX0		Q9H3P7	Q9NP97
						Q12860	Q16777	Q9H425	Q8NC51		Q9H3Q1	Q9NPH2
						Q12888	Q16799	Q9H444	Q8NCW5		Q9H425	Q9NQ29
						Q12905	Q16836	Q9H488	Q8NE71		Q9H444	Q9NQ34
						Q12906	Q16851	Q9H4F8	Q8NFW8		Q9H479	Q9NQ48
						Q12923	Q16881	Q9H4G4	Q8NFZ8		Q9H488	Q9NQC3
						Q13057	Q16891	Q9H8H3	Q8TAQ2		Q9H4A4	Q9NQG5
						Q13099	Q1KMD3	Q9HB71	Q8TBC4		Q9H4G0	Q9NQW7
						Q13123	Q2TAA2	Q9HC38	Q8TEA8		Q9H4G4	Q9NR31
						Q13148	Q2TAY7	Q9HCC8	Q8WUM4		Q9H4M9	Q9NRR5
						Q13151	Q3LXA3	Q9HDC9	Q8WXF1		Q9H8H3	Q9NRX4
						Q13162	Q49A26	Q9NP72	Q8WXX5		Q9H8Y8	Q9NS69
						Q13185	Q4G0J3	Q9NP79	Q8WY22		Q9H9B4	Q9NS86
						Q13200	Q4G0N4	Q9NPH2	Q8WZA0		Q9H9S4	Q9NTI5
						Q13228	Q52LJ0	Q9NQ29	Q92499		Q9HB71	Q9NTK5
						Q13242	Q53EL6	Q9NQ48	Q92520		Q9HBT6	Q9NUB1
						Q13243	Q53GQ0	Q9NQC3	Q92522		Q9HC38	Q9NUQ9
						Q13247	Q53GS9	Q9NQG5	Q92575		Q9HCJ6	Q9NVA2
						Q13263	Q53H82	Q9NQX7	Q92597		Q9HDC9	Q9NVJ2
						Q13283	Q5BKZ1	Q9NR31	Q92598		Q9NP72	Q9NWV4
						Q13308	Q5EBL8	Q9NR45	Q92599		Q9NP97	Q9NX05
						Q13315	Q5IJ48	Q9NRW1	Q92688		Q9NPH2	Q9NY47
						Q13404	Q5JSH3	Q9NRX4	Q92733		Q9NQ29	Q9NYB0
						Q13435	Q5JTV8	Q9NT99	Q92734		Q9NQ48	Q9NYF8
						Q13491	Q5KU26	Q9NTI5	Q92747		Q9NQC3	Q9NZ08
						Q13510	Q5SSJ5	Q9NTK5	Q92769		Q9NQG5	Q9NZ43
						Q13523	Q5T1J5	Q9NUQ9	Q92804		Q9NQW7	Q9NZZ3
						Q13526	Q5VW32	Q9NVA2	Q92820		Q9NR31	Q9P035
						Q13561	Q66K74	Q9NVJ2	Q92823		Q9NR46	Q9P0L0
						Q13576	Q66PJ3	Q9NWV4	Q92841		Q9NRR5	Q9P0M6
						Q13586	Q6I9Y2	Q9NX63	Q92896		Q9NRX4	Q9P121
						Q13595	Q6IAA8	Q9NXG2	Q92900		Q9NS69	Q9P258
						Q13630	Q6NVY1	Q9NY47	Q92905		Q9NSD9	Q9P2K5
						Q13641	Q6NW29	Q9NYF8	Q92945		Q9NTK5	Q9UBB4
						Q13642	Q6NZI2	Q9NYL9	Q93009		Q9NTZ6	Q9UBE0
						Q13813	Q6P2Q9	Q9NYU2	Q969G3		Q9NUJ1	Q9UBI6
						Q13822	Q6P4E1	Q9NZ08	Q969H8		Q9NUQ9	Q9UBP4
						Q13838	Q6STE5	Q9NZ45	Q96A26		Q9NVA2	Q9UBQ7
						Q13885	Q6UN15	Q9NZZ3	Q96AC1		Q9NVD7	Q9UBS4
						Q13938	Q6UW68	Q9P0L0	Q96AE4		Q9NWQ8	Q9UBT2
						Q14008	Q6UXB8	Q9P0M6	Q96AG4		Q9NWV4	Q9UD71
						Q14011	Q6YN16	Q9P0V9	Q96AQ6		Q9NX40	Q9UEU0
						Q14012	Q71DI3	Q9P121	Q96AY3		Q9NY47	Q9UEY8
						Q14019	Q71U36	Q9P2E9	Q96B54		Q9NYB9	Q9UH99
						Q14055	Q765P7	Q9P2K5	Q96BJ3		Q9NYL9	Q9UHA4
						Q14103	Q7KZF4	Q9P2T1	Q96BM9		Q9NZ08	Q9UHD8
						Q14108	Q7L014	Q9UBB4	Q96C19		Q9NZ56	Q9UHD9
						Q14118	Q7L0Y3	Q9UBE0	Q96CT7		Q9NZI8	Q9UHG3
						Q14139	Q7L1Q6	Q9UBI6	Q96CX2		Q9NZN3	Q9UHL4
						Q14157	Q7L266	Q9UBQ0	Q96DH6		Q9NZR1	Q9UHV9
						Q14165	Q7L4I2	Q9UBQ7	Q96DI7		Q9NZZ3	Q9UHX1
						Q14185	Q7L576	Q9UBS4	Q96F85		Q9P0L0	Q9UHY7
						Q14191	Q7L5N1	Q9UBT2	Q96FJ2		Q9P0M6	Q9UI30
						Q14195	Q7L775	Q9UD71	Q96FW1		Q9P0V9	Q9UIG0
						Q14204	Q7LG56	Q9UDT6	Q96G03		Q9P121	Q9UJ70
						Q14240	Q7RTV0	Q9UEU0	Q96GW7		Q9P2K5	Q9UJU6
						Q14247	Q7Z3B1	Q9UEY8	Q96HY6		Q9P2R7	Q9UKA9
						Q14254	Q7Z3D6	Q9UFN0	Q96I24		Q9UBB4	Q9UKM9
						Q14257	Q7Z3K3	Q9UGT4	Q96K17		Q9UBC2	Q9UKV3
						Q14289	Q7Z406	Q9UH03	Q96KP4		Q9UBE0	Q9UL18
						Q14315	Q7Z434	Q9UHD8	Q96KR1		Q9UBI6	Q9UL25
						Q14344	Q7Z4H8	Q9UHG3	Q96LD4		Q9UBQ0	Q9UL46
						Q14444	Q7Z4V5	Q9UHL4	Q96M27		Q9UBQ5	Q9ULR0
						Q14498	Q7Z6Z7	Q9UHQ4	Q96ME7		Q9UBQ7	Q9ULU4
						Q14517	Q7Z7H5	Q9UHX1	Q96PU8		Q9UBS4	Q9UMS4
						Q14554	Q86SX6	Q9UHY7	Q96QK1		Q9UBW8	Q9UMX5
						Q14573	Q86TX2	Q9UJ70	Q96QR8		Q9UBX1	Q9UN86
						Q14624	Q86U42	Q9UJU6	Q96SB3		Q9UBX5	Q9UNK0
						Q14669	Q86UE4	Q9UJZ1	Q96ST2		Q9UD71	Q9UNZ2
						Q14674	Q86UP2	Q9UK22	Q96TA1		Q9UEE9	Q9UPT8
						Q14697	Q86V81	Q9UKV3	Q99426		Q9UEY8	Q9UQ35
						Q14764	Q86VB7	Q9UL25	Q99436		Q9UH03	Q9UQ80
						Q14767	Q86VP6	Q9UL46	Q99459		Q9UH99	Q9UQ88
						Q14839	Q86VS8	Q9ULA0	Q99460		Q9UHD8	Q9UQE7
						Q14847	Q86W42	Q9ULC3	Q99497		Q9UHD9	Q9Y224
						Q14914	Q86XP3	Q9ULC4	Q99536		Q9UHG3	Q9Y230
						Q14974	Q86Y82	Q9UMS4	Q99623		Q9UHL4	Q9Y265
						Q14980	Q8IUD2	Q9UMX0	Q99627		Q9UHV9	Q9Y266
						Q14BN4	Q8IUF8	Q9UN36	Q99714		Q9UHX1	Q9Y277
						Q14CZ8	Q8IWA5	Q9UN86	Q99729		Q9UHY7	Q9Y281
						Q15019	Q8IX01	Q9UNK0	Q99733		Q9UI30	Q9Y2A7
						Q15020	Q8IX12	Q9UNM6	Q99798		Q9UJ70	Q9Y2B0
						Q15029	Q8IXH7	Q9UNS2	Q99829		Q9UJC5	Q9Y2J2
						Q15056	Q8IXS6	Q9UNZ2	Q99832		Q9UJU6	Q9Y2S2
						Q15067	Q8IXT5	Q9UQ35	Q99873		Q9UJY1	Q9Y2W1
						Q15084	Q8IYB3	Q9UQ80	Q99961		Q9UJZ1	Q9Y2W2
						Q15121	Q8IYD1	Q9UQE7	Q9BPU6		Q9UK22	Q9Y2X3
						Q15124	Q8IZ83	Q9Y224	Q9BRX8		Q9UKF7	Q9Y2Z0
						Q15149	Q8N126	Q9Y230	Q9BS26		Q9UKM9	Q9Y371
						Q15165	Q8N163	Q9Y262	Q9BT09		Q9UKV3	Q9Y383
						Q15181	Q8N1G4	Q9Y265	Q9BTT0		Q9UL25	Q9Y3A6
						Q15185	Q8N2G4	Q9Y266	Q9BTV4		Q9UL46	Q9Y3B3
						Q15233	Q8N2K0	Q9Y277	Q9BUF5		Q9ULA0	Q9Y3E1
						Q15256	Q8N3U4	Q9Y281	Q9BUJ2		Q9ULC3	Q9Y3F4
						Q15257	Q8N4P3	Q9Y2A7	Q9BUL8		Q9ULC4	Q9Y3I0
						Q15287	Q8N4V1	Q9Y2J2	Q9BVA1		Q9ULZ3	Q9Y3U8
						Q15293	Q8N568	Q9Y2S2	Q9BVG4		Q9UM19	Q9Y490
						Q15334	Q8N5K1	Q9Y2W1	Q9BVK6		Q9UMS4	Q9Y4E1
						Q15345	Q8N684	Q9Y2X3	Q9BW30		Q9UMX0	Q9Y4L1
						Q15363	Q8N6C5	Q9Y383	Q9BWD1		Q9UMX5	Q9Y5B9
						Q15365	Q8N6H7	Q9Y3B3	Q9BX66		Q9UN36	Q9Y5S9
						Q15366	Q8N6N7	Q9Y3E7	Q9BXK5		Q9UNF0	Q9Y617
						Q15369	Q8N8N7	Q9Y3F4	Q9BXP5		Q9UNM6	Q9Y624
						Q15370	Q8NBJ4	Q9Y3I0	Q9BY32		Q9UNZ2	Q9Y639
						Q15375	Q8NBJ7	Q9Y3U8	Q9BY67		Q9UPN3	Q9Y653
						Q15388	Q8NBS9	Q9Y490	Q9BZZ5		Q9UPQ0	Q9Y666
						Q15389	Q8NC51	Q9Y4E1	Q9C0C2		Q9UPY6	Q9Y696
						Q15393	Q8NCW5	Q9Y4F1	Q9GZP4		Q9UQ35	Q9Y6C9
						Q15417	Q8NE71	Q9Y4L1	Q9GZS3		Q9UQ80	Q9Y6I3
						Q15424	Q8NFW8	Q9Y5S9	Q9H0R4		Q9UQB3	Q9Y6K1
						Q15427	Q8NHP8	Q9Y5Y2	Q9H0U4		Q9UQE7	Q9Y6R7
						Q15436	Q8NI22	Q9Y5Z4	Q9H1E3		Q9Y224	Q9Y6X4
						Q15459	Q8NI27	Q9Y617	Q9H1E5		Q9Y230
						Q15506	Q8TAQ2	Q9Y639	Q9H299		Q9Y265
						Q15573	Q8TB36	Q9Y696	Q9H307		Q9Y266
						Q15582	Q8TBC5	Q9Y6R7	Q9H3G5		Q9Y281
						Q15599	Q8TCD5		Q9H3N1		Q9Y2B0
						Q15643	Q8TD06		Q9H3P7		Q9Y2J2
						Q15651	Q8TDQ7		Q9H3Q1		Q9Y2S2
						Q15717	Q8TEA8		Q9H3Z4		Q9Y2W1
						Q15811	Q8TEX9		Q9H425		Q9Y2W2
						Q15833	Q8WU90		Q9H444		Q9Y2X3
						Q15835	Q8WUM4		Q9H479		Q9Y2Z0
						Q15836	Q8WUW1		Q9H4G4		Q9Y315
						Q15907	Q8WVF1		Q9H4M9		Q9Y371
						Q16181	Q8WVJ2		Q9H8H3		Q9Y376
						Q16401	Q8WVK2		Q9H9B4		Q9Y383
						Q16531	Q8WVM8		Q9HAT2		Q9Y3B3
						Q16538	Q8WVY7		Q9HAV0		Q9Y3C8
						Q16543	Q8WWI5		Q9HB71		Q9Y3D6
						Q16555	Q8WWQ0		Q9HC38		Q9Y3E1
						Q16563	Q8WWY3		Q9HCN8		Q9Y3E7
						Q16576	Q8WXF1		Q9HDC9		Q9Y3F4
						Q16620	Q8WXX5		Q9NP72		Q9Y3I0
						Q16629	Q8WYR4		Q9NP97		Q9Y3Q8
						Q16630	Q8WZA0		Q9NPH2		Q9Y3U8
						Q16658	Q92499		Q9NPY3		Q9Y3X0
						Q16690	Q92542		Q9NQ29		Q9Y3Z3
						Q16698	Q92575		Q9NQ48		Q9Y490
						Q16718	Q92597		Q9NQC3		Q9Y4E1
						Q16720	Q92598		Q9NQG5		Q9Y4F1
						Q16760	Q92599		Q9NQX7		Q9Y4J8
						Q16777	Q92616		Q9NR31		Q9Y4L1
						Q16836	Q92688		Q9NR45		Q9Y4Y9
						Q16851	Q92692		Q9NR46		Q9Y5K8
						Q16864	Q92734		Q9NRQ2		Q9Y5L4
						Q16877	Q92747		Q9NRR5		Q9Y5S9
						Q16891	Q92769		Q9NRW1		Q9Y5X3
						Q17RW2	Q92797		Q9NRX4		Q9Y5Z4
						Q1KMD3	Q92804		Q9NS69		Q9Y617
						Q29865	Q92820		Q9NSD9		Q9Y639
						Q29940	Q92841		Q9NTI5		Q9Y696
						Q2NKQ1	Q92878		Q9NTK5		Q9Y6B6
						Q2TAY7	Q92879		Q9NUQ9		Q9Y6E0
						Q2TB90	Q92882		Q9NVA2		Q9Y6I3
						Q32ZD5	Q92896		Q9NVD7
						Q3KST0	Q92900		Q9NVJ2
						Q3LXA3	Q92945		Q9NWV4
						Q3MIR4	Q92973		Q9NX63
						Q3SXM5	Q93009		Q9NY33
						Q3SYG4	Q93034		Q9NY47
						Q4G0Z9	Q969E4		Q9NYB0
						Q4LDE5	Q969G3		Q9NYF8
						Q4LEZ3	Q969H8		Q9NYL9
						Q4R525	Q96A26		Q9NYU2
						Q4V328	Q96A49		Q9NZ08
						Q52LJ0	Q96AB3		Q9NZ45
						Q52MB2	Q96AC1		Q9NZJ7
						Q53EL6	Q96AE4		Q9NZZ3
						Q53FE4	Q96AG4		Q9P035
						Q53GQ0	Q96B23		Q9P0L0
						Q53GS9	Q96B54		Q9P0M6
						Q53RD9	Q96C19		Q9P0V9
						Q562R1	Q96C74		Q9P121
						Q569K6	Q96C86		Q9P258
						Q5BKZ1	Q96C90		Q9P2E9
						Q5FWF5	Q96CS3		Q9P2J5
						Q5H9F3	Q96CT7		Q9P2K5
						Q5HYM0	Q96CX2		Q9UBB4
						Q5IFJ7	Q96DB5		Q9UBC2
						Q5IJ48	Q96DI7		Q9UBE0
						Q5IS59	Q96EY8		Q9UBI6
						Q5IS74	Q96F85		Q9UBQ0
						Q5JSH3	Q96FT9		Q9UBQ7
						Q5JT82	Q96FW1		Q9UBR2
						Q5JTV8	Q96FZ2		Q9UBS4
						Q5JWF2	Q96G03		Q9UD71
						Q5JZY3	Q96GG9		Q9UDT6
						Q5KU26	Q96GW7		Q9UEU0
						Q5QNW6	Q96HY6		Q9UEY8
						Q5SR53	Q96I24		Q9UFN0
						Q5SRE5	Q96KG7		Q9UGT4
						Q5SSJ5	Q96KP4		Q9UHA4
						Q5SV17	Q96KR1		Q9UHD8
						Q5T0T0	Q96ME7		Q9UHG3
						Q5T1J6	Q96MU7		Q9UHL4
						Q5T1R4	Q96P16		Q9UHX1
						Q5T2S8	Q96PK6		Q9UHY7
						Q5T2T1	Q96PU8		Q9UI09
						Q5T4H9	Q96QK1		Q9UJ70
						Q5T5J6	Q96QR8		Q9UJU6
						Q5T764	Q96ST2		Q9UJW0
						Q5T9L3	Q96ST3		Q9UJZ1
						Q5TA50	Q96T23		Q9UK22
						Q5TD94	Q99436		Q9UKK9
						Q5TGZ0	Q99459		Q9UKM9
						Q5THJ4	Q99460		Q9UKV3
						Q5U5R9	Q99471		Q9UL25
						Q5UAW9	Q99497		Q9UL46
						Q5UCB8	Q99536		Q9ULC3
						Q5VST9	Q99584		Q9ULC4
						Q5VTE0	Q99614		Q9ULV4
						Q5VTH9	Q99627		Q9UM07
						Q5VU57	Q99714		Q9UMS4
						Q5VU97	Q99729		Q9UMX0
						Q5VVS0	Q99733		Q9UN36
						Q5VW36	Q99747		Q9UN86
						Q5VWG9	Q99798		Q9UNF0
						Q5W111	Q99816		Q9UNH7
						Q5XKP0	Q99832		Q9UNK0
						Q5XPI4	Q99873		Q9UNM6
						Q5XX13	Q99961		Q9UNS2
						Q658P3	Q9BPW8		Q9UNZ2
						Q66282	Q9BPX5		Q9UQ35
						Q66478	Q9BR76		Q9UQ80
						Q66578	Q9BRA2		Q9UQB3
						Q67863	Q9BS26		Q9Y230
						Q68DA7	Q9BSJ8		Q9Y237
						Q6DNM2	Q9BT78		Q9Y265
						Q6ECI4	Q9BTT0		Q9Y266
						Q6F5E8	Q9BUF5		Q9Y277
						Q6FI81	Q9BUH6		Q9Y281
						Q6I7B9	Q9BUJ2		Q9Y2A7
						Q6IAA8	Q9BUL8		Q9Y2B0
						Q6JQN1	Q9BUQ8		Q9Y2J2
						Q6NUN7	Q9BUR5		Q9Y2S2
						Q6NYC1	Q9BUT1		Q9Y2W1
						Q6NZI2	Q9BV86		Q9Y2W2
						Q6P1M3	Q9BVA1		Q9Y2X3
						Q6P2Q9	Q9BVC6		Q9Y2Z0
						Q6P4D5	Q9BVG4		Q9Y371
						Q6P4E1	Q9BVK6		Q9Y383
						Q6PRD7	Q9BW30		Q9Y3A6
						Q6RI45	Q9BW83		Q9Y3B3
						Q6SW62	Q9BW91		Q9Y3E1
						Q6SWC4	Q9BX66		Q9Y3F4
						Q6UW68	Q9BX67		Q9Y3I0
						Q6UXB8	Q9BX68		Q9Y3U8
						Q6UXS9	Q9BXK5		Q9Y3Z3
						Q6WB93	Q9BXP5		Q9Y490
						Q6WBX8	Q9BY32		Q9Y4F1
						Q6X2U3	Q9BY43		Q9Y4L1
						Q6X4W1	Q9BY67		Q9Y5B9
						Q6XQI4	Q9BYT3		Q9Y5S9
						Q6XQN6	Q9BZV1		Q9Y617
						Q6XTD8	Q9BZZ5		Q9Y639
						Q6Y288	Q9C005		Q9Y678
						Q6YN16	Q9C040		Q9Y696
						Q6ZMW3	Q9C0E8		Q9Y6B6
						Q6ZP82	Q9GZP4		Q9Y6R7
						Q6ZQQ6	Q9GZS3		Q9Y6W5
						Q6ZQW0	Q9GZT4		Q9Y6X4
						Q6ZRQ5	Q9GZT8
						Q6ZRV2	Q9H008
						Q6ZT89	Q9H074
						Q6ZU69	Q9H0C8
						Q6ZUT9	Q9H0D6
						Q6ZW49	Q9H0Q3
						Q709C8	Q9H0R4
						Q70UQ0	Q9H0U4
						Q71U36	Q9H0W9
						Q75T13	Q9H1E3
						Q765P7	Q9H1E5
						Q76634	Q9H1K1
						Q76LX8	Q9H299
						Q7KZF4	Q9H2P0
						Q7L014	Q9H2U2
						Q7L576	Q9H307
						Q7L775	Q9H3G5
						Q7Z353	Q9H3Q1
						Q7Z3B1	Q9H3Z4
						Q7Z3C6	Q9H425
						Q7Z3J3	Q9H444
						Q7Z406	Q9H488
						Q7Z465	Q9H4A4
						Q7Z478	Q9H4A6
						Q7Z4S6	Q9H4G0
						Q7Z4V5	Q9H4G4
						Q7Z572	Q9H4M9
						Q7Z5B4	Q9H6Z4
						Q7Z5J8	Q9H7X7
						Q7Z6Z7	Q9H8H3
						Q7Z7G8	Q9H8Y8
						Q7Z7H5	Q9H9H4
						Q7Z7K6	Q9H9S4
						Q80912	Q9HAT2
						Q80937	Q9HB07
						Q86108	Q9HB40
						Q86TV6	Q9HC38
						Q86TW2	Q9HC78
						Q86U42	Q9HCC8
						Q86UA1	Q9HCD5
						Q86UE4	Q9HCS2
						Q86UP2	Q9HDC9
						Q86US8	Q9NP72
						Q86UX7	Q9NP79
						Q86UZ6	Q9NPF4
						Q86V81	Q9NPJ3
						Q86VB7	Q9NPQ8
						Q86VD1	Q9NQ29
						Q86VI3	Q9NQ34
						Q86VP6	Q9NQ48
						Q86VV4	Q9NQC3
						Q86WI1	Q9NQG5
						Q86XM0	Q9NQR4
						Q86XT2	Q9NQW7
						Q86Y33	Q9NQX7
						Q86Y82	Q9NR28
						Q86YT6	Q9NR45
						Q8IUA7	Q9NRN7
						Q8IVF2	Q9NRR5
						Q8IVI9	Q9NRV9
						Q8IVW4	Q9NRX4
						Q8IWA5	Q9NS69
						Q8IWC1	Q9NS86
						Q8IWI9	Q9NSD9
						Q8IWJ2	Q9NT62
						Q8IWL1	Q9NT99
						Q8IX01	Q9NTI5
						Q8IX12	Q9NTK5
						Q8IXF0	Q9NUJ1
						Q8IXQ5	Q9NUL5
						Q8IXT5	Q9NUP9
						Q8IXY8	Q9NUQ9
						Q8IYA2	Q9NUU7
						Q8IYA8	Q9NVA2
						Q8IYB3	Q9NVD7
						Q8IYF1	Q9NVS9
						Q8IYI6	Q9NWH9
						Q8IYN0	Q9NWV4
						Q8IZU8	Q9NX05
						Q8IZX4	Q9NX24
						Q8JPX5	Q9NX40
						Q8N0U8	Q9NX63
						Q8N0X7	Q9NXG2
						Q8N126	Q9NY33
						Q8N159	Q9NYB0
						Q8N163	Q9NYF8
						Q8N1C3	Q9NYL9
						Q8N1X5	Q9NZ08
						Q8N2G4	Q9NZJ9
						Q8N2R8	Q9NZL4
						Q8N302	Q9NZR1
						Q8N339	Q9NZW5
						Q8N392	Q9NZZ3
						Q8N3C0	Q9P035
						Q8N3Y1	Q9P0L0
						Q8N4B1	Q9P0M6
						Q8N4C6	Q9P0V9
						Q8N4V2	Q9P121
						Q8N5K1	Q9P258
						Q8N6C5	Q9P265
						Q8N8N7	Q9P289
						Q8NAB2	Q9P2E9
						Q8NAP3	Q9P2I0
						Q8NAV1	Q9P2J5
						Q8NB91	Q9P2K5
						Q8NBJ4	Q9P2T1
						Q8NBJ7	Q9UBB4
						Q8NBP0	Q9UBC2
						Q8NBS9	Q9UBE0
						Q8NBX0	Q9UBG0
						Q8NC56	Q9UBI6
						Q8NC67	Q9UBK7
						Q8NCW5	Q9UBP4
						Q8ND71	Q9UBQ0
						Q8NDZ6	Q9UBQ7
						Q8NE01	Q9UBS4
						Q8NE09	Q9UBT2
						Q8NE35	Q9UBW8
						Q8NER5	Q9UBX5
						Q8NEV1	Q9UD71
						Q8NEY1	Q9UDT6
						Q8NF91	Q9UEE9
						Q8NFH5	Q9UEU0
						Q8NFP9	Q9UEY8
						Q8NFW8	Q9UFN0
						Q8NFY4	Q9UGV2
						Q8NGF3	Q9UH03
						Q8NHG7	Q9UHA4
						Q8NHP8	Q9UHD8
						Q8TAK5	Q9UHD9
						Q8TBE0	Q9UHG2
						Q8TCU4	Q9UHG3
						Q8TCU5	Q9UHL4
						Q8TCY9	Q9UHQ4
						Q8TD43	Q9UHQ9
						Q8TD57	Q9UHV9
						Q8TDB8	Q9UHX1
						Q8TDC3	Q9UHY7
						Q8TDD1	Q9UI09
						Q8TDJ6	Q9UI30
						Q8TDN6	Q9UIA9
						Q8TDV0	Q9UIG0
						Q8TDX9	Q9UIJ7
						Q8TDY8	Q9UIL1
						Q8TE54	Q9UIS9
						Q8TEF2	Q9UJ70
						Q8TF09	Q9UJ90
						Q8V4V4	Q9UJU6
						Q8WTR7	Q9UJZ1
						Q8WU20	Q9UK41
						Q8WVB6	Q9UKM9
						Q8WVC0	Q9UKV3
						Q8WVF1	Q9UL25
						Q8WVF5	Q9UL46
						Q8WVY7	Q9ULC3
						Q8WWI5	Q9ULC4
						Q8WWQ0	Q9ULX6
						Q8WWZ4	Q9ULZ3
						Q8WWZ8	Q9UMS4
						Q8WXF3	Q9UMX0
						Q8WXX5	Q9UMX5
						Q8WYA6	Q9UN36
						Q8WYR4	Q9UN86
						Q8WZ42	Q9UNF0
						Q8WZ75	Q9UNH7
						Q92499	Q9UNK0
						Q92506	Q9UNM6
						Q92542	Q9UNS2
						Q92574	Q9UNZ2
						Q92597	Q9UPT8
						Q92598	Q9UQ35
						Q92599	Q9UQ80
						Q92616	Q9UQ88
						Q92618	Q9UQB3
						Q92620	Q9UQE7
						Q92628	Q9Y224
						Q92637	Q9Y230
						Q92688	Q9Y265
						Q92692	Q9Y266
						Q92734	Q9Y277
						Q92747	Q9Y281
						Q92771	Q9Y285
						Q92804	Q9Y2A7
						Q92820	Q9Y2B0
						Q92823	Q9Y2J2
						Q92841	Q9Y2Q3
						Q92878	Q9Y2Q5
						Q92882	Q9Y2S2
						Q92890	Q9Y2T3
						Q92896	Q9Y2W1
						Q92900	Q9Y2W2
						Q92901	Q9Y2X3
						Q92945	Q9Y2Z0
						Q92973	Q9Y315
						Q93009	Q9Y376
						Q93063	Q9Y383
						Q969E4	Q9Y394
						Q969G3	Q9Y3A5
						Q969H8	Q9Y3B3
						Q969S9	Q9Y3C4
						Q969X6	Q9Y3C6
						Q96A26	Q9Y3E1
						Q96A57	Q9Y3E7
						Q96AC1	Q9Y3F4
						Q96AE4	Q9Y3I0
						Q96AG4	Q9Y3U8
						Q96AQ6	Q9Y3X0
						Q96AY3	Q9Y3Z3
						Q96AY4	Q9Y490
						Q96BY6	Q9Y4E1
						Q96C19	Q9Y4F1
						Q96CN4	Q9Y4J8
						Q96CW1	Q9Y4L1
						Q96CW5	Q9Y570
						Q96CX2	Q9Y5B9
						Q96DH6	Q9Y5K6
						Q96DR5	Q9Y5L3
						Q96EH3	Q9Y5L4
						Q96ER3	Q9Y5S9
						Q96FI4	Q9Y5X3
						Q96FW1	Q9Y5Z4
						Q96G23	Q9Y617
						Q96G46	Q9Y639
						Q96GQ7	Q9Y646
						Q96GW7	Q9Y678
						Q96GX9	Q9Y696
						Q96H55	Q9Y6B6
						Q96HE7	Q9Y6E0
						Q96HN2	Q9Y6I3
						Q96HR9	Q9Y6K5
						Q96HU1	Q9Y6M9
						Q96HY6	Q9Y6X4
						Q96I24	Q9Y6X8
						Q96II8
						Q96JH7
						Q96K21
						Q96K30
						Q96KP4
						Q96KS0
						Q96LL4
						Q96LT4
						Q96M27
						Q96M86
						Q96M94
						Q96MH6
						Q96MT8
						Q96N96
						Q96NY7
						Q96PE2
						Q96PK6
						Q96PN6
						Q96Q89
						Q96QK1
						Q96RW7
						Q96RY5
						Q96S97
						Q96SB8
						Q96SI1
						Q96ST2
						Q96SZ6
						Q96T68
						Q98803
						Q99426
						Q99459
						Q99460
						Q99469
						Q99471
						Q99497
						Q99523
						Q99536
						Q99613
						Q99614
						Q99623
						Q99653
						Q99714
						Q99729
						Q99733
						Q99747
						Q99798
						Q997F0
						Q99832
						Q99873
						Q99946
						Q99959
						Q99961
						Q9BPX5
						Q9BQB6
						Q9BQI6
						Q9BR26
						Q9BRA2
						Q9BRJ9
						Q9BRT3
						Q9BRX8
						Q9BS26
						Q9BSE4
						Q9BSJ2
						Q9BSJ8
						Q9BTA0
						Q9BTT0
						Q9BTW9
						Q9BUA6
						Q9BUF5
						Q9BUH6
						Q9BUJ2
						Q9BUL8
						Q9BUQ8
						Q9BUR5
						Q9BUT1
						Q9BV40
						Q9BV57
						Q9BVA1
						Q9BVC6
						Q9BVG4
						Q9BVK6
						Q9BW30
						Q9BWF2
						Q9BWM7
						Q9BWS9
						Q9BX66
						Q9BXF3
						Q9BXK5
						Q9BXP5
						Q9BXS1
						Q9BXW6
						Q9BY67
						Q9BYB0
						Q9BZ29
						Q9BZ72
						Q9BZD4
						Q9C000
						Q9C0D5
						Q9C0E2
						Q9C0G6
						Q9H008
						Q9H0A9
						Q9H0E2
						Q9H0R4
						Q9H0U4
						Q9H0Z9
						Q9H1B5
						Q9H1E5
						Q9H1P6
						Q9H221
						Q9H257
						Q9H299
						Q9H2K0
						Q9H2M9
						Q9H307
						Q9H361
						Q9H3G5
						Q9H3N1
						Q9H3Q1
						Q9H425
						Q9H444
						Q9H4B4
						Q9H4G0
						Q9H582
						Q9H5P4
						Q9H6R0
						Q9H7N4
						Q9H7P6
						Q9H7Z7
						Q9H869
						Q9H8E8
						Q9H8H3
						Q9H930
						Q9H999
						Q9HAS3
						Q9HB07
						Q9HB40
						Q9HC36
						Q9HC38
						Q9HC78
						Q9HCC0
						Q9HCC8
						Q9HCD5
						Q9HCE3
						Q9HCE5
						Q9HCP6
						Q9HD45
						Q9HDC9
						Q9INI3
						Q9NP72
						Q9NP92
						Q9NPD5
						Q9NPH2
						Q9NPH6
						Q9NQ29
						Q9NQ48
						Q9NQ69
						Q9NQC3
						Q9NQG5
						Q9NQL2
						Q9NR48
						Q9NRQ2
						Q9NS00
						Q9NS69
						Q9NSV4
						Q9NSY0
						Q9NT62
						Q9NT68
						Q9NTI5
						Q9NTJ3
						Q9NTJ5
						Q9NTK5
						Q9NTZ6
						Q9NU22
						Q9NU63
						Q9NUN5
						Q9NUQ9
						Q9NUT2
						Q9NVE4
						Q9NVP1
						Q9NWH7
						Q9NWV4
						Q9NX40
						Q9NX63
						Q9NXC5
						Q9NYF8
						Q9NYL9
						Q9NYQ8
						Q9NYU2
						Q9NZ01
						Q9NZ08
						Q9NZ43
						Q9NZ45
						Q9NZ63
						Q9NZN1
						Q9NZQ8
						Q9P016
						Q9P032
						Q9P035
						Q9P0L0
						Q9P0M6
						Q9P0S9
						Q9P0T7
						Q9P0U1
						Q9P0V9
						Q9P1F3
						Q9P1P5
						Q9P203
						Q9P286
						Q9P2D7
						Q9P2D8
						Q9P2E7
						Q9P2E9
						Q9P2F6
						Q9P2G1
						Q9P2K5
						Q9P2K8
						Q9P2R3
						Q9QB93
						Q9QJ45
						Q9UBF2
						Q9UBI1
						Q9UBI6
						Q9UBP5
						Q9UBQ0
						Q9UBQ7
						Q9UBR2
						Q9UBT7
						Q9UBW8
						Q9UBX5
						Q9UBY0
						Q9UBY8
						Q9UD71
						Q9UDW1
						Q9UDX3
						Q9UEU0
						Q9UEY8
						Q9UFN0
						Q9UG01
						Q9UGM6
						Q9UH65
						Q9UHD8
						Q9UHD9
						Q9UHG3
						Q9UHI5
						Q9UHL4
						Q9UHQ9
						Q9UHV9
						Q9UHX1
						Q9UIF8
						Q9UIL1
						Q9UJ70
						Q9UJ90
						Q9UJA3
						Q9UJF2
						Q9UJU6
						Q9UJV3
						Q9UJZ1
						Q9UK22
						Q9UKE5
						Q9UKV3
						Q9UL46
						Q9UL68
						Q9ULC4
						Q9ULE3
						Q9ULK2
						Q9ULL4
						Q9ULV0
						Q9ULZ3
						Q9UMS4
						Q9UMX5
						Q9UN36
						Q9UNF0
						Q9UNH5
						Q9UNK0
						Q9UNM6
						Q9UNY4
						Q9UNZ2
						Q9UPR5
						Q9UPU7
						Q9UPY8
						Q9UQ35
						Q9UQ80
						Q9UQ84
						Q9UQE7
						Q9UQK1
						Q9UQP3
						Q9WN78
						Q9Y224
						Q9Y230
						Q9Y253
						Q9Y265
						Q9Y266
						Q9Y277
						Q9Y281
						Q9Y2B0
						Q9Y2G2
						Q9Y2G9
						Q9Y2I6
						Q9Y2J2
						Q9Y2J8
						Q9Y2P4
						Q9Y2Q3
						Q9Y2T1
						Q9Y2T3
						Q9Y2W1
						Q9Y2X3
						Q9Y2Y0
						Q9Y2Z9
						Q9Y330
						Q9Y376
						Q9Y383
						Q9Y3B3
						Q9Y3B6
						Q9Y3D6
						Q9Y3I0
						Q9Y3L5
						Q9Y3U8
						Q9Y3Z3
						Q9Y490
						Q9Y4A5
						Q9Y4B6
						Q9Y4D8
						Q9Y4E1
						Q9Y4L1
						Q9Y519
						Q9Y546
						Q9Y5B9
						Q9Y5G7
						Q9Y5Q9
						Q9Y5R5
						Q9Y5S9
						Q9Y617
						Q9Y639
						Q9Y6B6
						Q9Y6D9
						Q9Y6E0
						Q9Y6H5
						Q9Y6I3
[truncated: 10 more rows]

## Sheet: B
	Venn diagram of the protein elements identified per analyzed sample by shotgun proteomic analysis
	Input files:
	List names	number of elements	number of unique elements
	EP1	903	903
	EP10	1275	1275
	EP11	1425	1425
	EP12	1121	1121
	EP2	564	564
	EP3	900	900
	EP4	1318	1318
	EP5	849	849
	EP6	853	853
	EP7	2007	2007
	EP8	1658	1658
	EP9	1279	1279
	Overall number of unique elements		3182
	Image result:	14152
	We're sorry, you provided too many different lists to be captured in a single drawing.
	Text results:
	Names	total	elements
	EP1 EP10 EP11 EP12 EP2 EP3 EP4 EP5 EP6 EP7 EP8 EP9	284	P09651 P05388 P50990 Q16181 P35241 O75947 P51148 P09874 Q99832 Q5SSJ5 Q07020 O94905 P05026 P51991 P08195 Q9Y3U8 P04004 Q00610 P12956 O43175 P60174 O75367 P37802 P11021 P16401 P10809 P08133 P55072 Q14974 P36578 P00734 Q15836 P26641 P00450 P32119 P13987 Q12846 P00387 P08708 Q09666 Q07065 Q99536 Q16555 O00299 P07910 P11233 Q92896 P12277 P08670 Q96AG4 P06748 P61088 Q99733 P16070 P68363 P06733 Q15366 …
	EP1 EP10 EP11 EP2 EP3 EP4 EP5 EP6 EP7 EP8 EP9	5	Q5JTV8 P78527 Q15424 Q9H8H3 Q14344
	EP1 EP10 EP12 EP2 EP3 EP4 EP5 EP6 EP7 EP8 EP9	1	P62820
	EP1 EP11 EP12 EP2 EP3 EP4 EP5 EP6 EP7 EP8 EP9	3	Q9UN36 Q12860 O15061
	EP1 EP10 EP11 EP12 EP2 EP3 EP4 EP5 EP6 EP7 EP8	1	Q16777
	EP1 EP10 EP11 EP12 EP2 EP3 EP4 EP5 EP6 EP7 EP9	1	P01871
	EP1 EP10 EP11 EP12 EP2 EP3 EP4 EP5 EP6 EP8 EP9	7	Q13449 P01857 Q16643 P68104 P35221 P63092 P27635
	EP1 EP10 EP11 EP12 EP2 EP3 EP4 EP5 EP7 EP8 EP9	4	P00918 P35579 P04040 P83731
	EP1 EP10 EP11 EP12 EP2 EP3 EP4 EP6 EP7 EP8 EP9	21	P51674 P23471 Q14444 Q92945 P30626 Q96A26 Q9UBI6 P05091 P26232 Q08170 O43491 P50897 Q99497 Q9Y3I0 Q96HY6 Q9UEY8 Q9Y383 P35268 P62873 Q13561 P62834
	EP1 EP10 EP11 EP12 EP2 EP3 EP5 EP6 EP7 EP8 EP9	6	P05198 P46777 Q6IAA8 P12109 Q9BY67 Q9H0U4
	EP1 EP10 EP11 EP12 EP2 EP4 EP5 EP6 EP7 EP8 EP9	8	Q16698 Q8NBJ4 P62424 Q13263 O60506 Q96GW7 P23246 Q9UD71
	EP1 EP10 EP11 EP12 EP3 EP4 EP5 EP6 EP7 EP8 EP9	111	P80723 Q86VP6 P01019 P07741 P14868 P0C0S5 P00441 P61247 P51149 P55036 P02765 O43852 P05455 P04271 P63208 P18206 P04792 P25787 P63241 P22392 Q92688 P35237 Q13228 P07339 P21964 P60900 P62140 O15144 Q15393 P02763 Q99714 P61916 O43681 P04196 P02675 P10599 P11216 P01011 P06727 P67936 P30044 P61106 P01009 P51572 P35580 O95336 Q92820 Q9Y639 Q06323 P48735 P61158 Q9UHD8 P61019 P54727 P63244 P58546 P04080 …
	EP10 EP11 EP12 EP2 EP3 EP4 EP5 EP6 EP7 EP8 EP9	7	P50454 Q12765 P15531 P52209 P22695 P00367 P11766
	EP1 EP12 EP2 EP3 EP4 EP5 EP6 EP7 EP8 EP9	1	Q9BUT1
	EP1 EP10 EP11 EP2 EP3 EP4 EP5 EP6 EP7 EP9	1	P14415
	EP1 EP10 EP12 EP2 EP3 EP4 EP5 EP6 EP7 EP9	1	P02533
	EP1 EP10 EP12 EP2 EP3 EP4 EP5 EP6 EP8 EP9	1	Q13765
	EP1 EP10 EP12 EP2 EP3 EP4 EP6 EP7 EP8 EP9	1	P61020
	EP1 EP10 EP11 EP12 EP2 EP3 EP4 EP6 EP8 EP9	4	Q9NRX4 P68400 P29218 Q15691
	EP1 EP10 EP11 EP12 EP2 EP3 EP4 EP7 EP8 EP9	3	P48681 Q13526 O94811
	EP1 EP11 EP12 EP2 EP3 EP5 EP6 EP7 EP8 EP9	2	P54652 Q9P2E9
	EP1 EP10 EP11 EP12 EP2 EP3 EP5 EP6 EP7 EP9	2	P13647 P04003
	EP1 EP10 EP11 EP12 EP2 EP3 EP6 EP7 EP8 EP9	1	P09972
	EP1 EP10 EP11 EP2 EP4 EP5 EP6 EP7 EP8 EP9	7	P62701 Q6P2Q9 Q15334 P27816 Q9P0M6 P08621 Q14980
	EP1 EP10 EP11 EP12 EP2 EP4 EP5 EP7 EP8 EP9	2	Q9Y2W1 Q92804
	EP1 EP10 EP11 EP12 EP2 EP4 EP6 EP7 EP8 EP9	4	P55795 P51858 Q8N163 Q52LJ0
	EP1 EP10 EP11 EP3 EP4 EP5 EP6 EP7 EP8 EP9	4	P84243 P49411 Q13148 P31942
	EP1 EP10 EP12 EP3 EP4 EP5 EP6 EP7 EP8 EP9	3	P20340 P02654 P55769
	EP1 EP11 EP12 EP3 EP4 EP5 EP6 EP7 EP8 EP9	2	P30046 P46940
	EP1 EP10 EP11 EP12 EP3 EP4 EP5 EP6 EP7 EP8	1	P55084
	EP1 EP10 EP11 EP12 EP3 EP4 EP5 EP6 EP7 EP9	1	P07305
	EP1 EP10 EP11 EP12 EP3 EP4 EP5 EP6 EP8 EP9	5	P46778 Q13011 P00491 O15347 O14818
	EP1 EP10 EP11 EP12 EP3 EP4 EP5 EP7 EP8 EP9	14	P01876 Q9Y4L1 P30533 P02794 O43169 Q9Y3B3 P02671 Q9NQ48 P02788 O60831 P68032 P39060 P00167 P12270
	EP1 EP10 EP11 EP12 EP3 EP4 EP6 EP7 EP8 EP9	25	P41208 P20339 P17655 P28838 P49721 Q13283 P28066 P55010 P62333 P22307 P20618 P17987 P62888 O75781 Q04760 P31153 P56134 P13804 P10155 Q9UHX1 O43598 Q9UL46 P30049 P43487 P25398
	EP1 EP10 EP11 EP12 EP3 EP5 EP6 EP7 EP8 EP9	5	Q96QK1 P02652 P04259 Q9Y277 P12236
	EP1 EP10 EP11 EP12 EP4 EP5 EP6 EP7 EP8 EP9	7	P62318 P62249 O75915 P09486 Q9UNZ2 O00161 Q15717
	EP10 EP11 EP2 EP3 EP4 EP5 EP6 EP7 EP8 EP9	2	Q07954 Q13151
	EP11 EP12 EP2 EP3 EP4 EP5 EP6 EP7 EP8 EP9	2	O15075 P12814
	EP10 EP11 EP12 EP2 EP3 EP4 EP6 EP7 EP8 EP9	3	P45974 O43765 Q8IWA5
	EP10 EP11 EP12 EP3 EP4 EP5 EP6 EP7 EP8 EP9	26	Q01995 P62847 P09960 Q07960 Q9NTK5 P02766 O75368 Q15907 P36405 P05155 Q01518 O60749 O15511 P46108 P68036 P43307 P26885 P04179 Q15257 P04216 P01042 P25789 Q9HC38 Q15185 P27105 P46109
	EP1 EP10 EP11 EP2 EP3 EP4 EP5 EP6 EP9	1	P23634
	EP1 EP11 EP2 EP3 EP4 EP5 EP7 EP8 EP9	1	O75369
	EP1 EP10 EP11 EP2 EP3 EP4 EP6 EP7 EP9	1	O15540
	EP1 EP10 EP11 EP2 EP3 EP4 EP7 EP8 EP9	1	Q14247
	EP1 EP10 EP11 EP12 EP2 EP3 EP4 EP8 EP9	2	P07954 Q16799
	EP1 EP10 EP11 EP2 EP4 EP5 EP6 EP8 EP9	1	Q9NVA2
	EP1 EP10 EP11 EP12 EP2 EP4 EP5 EP7 EP9	1	Q96AQ6
	EP1 EP10 EP11 EP2 EP4 EP6 EP7 EP8 EP9	4	Q9UKV3 P63167 Q9P2K5 P04908
	EP1 EP10 EP11 EP12 EP2 EP4 EP7 EP8 EP9	2	Q9UQ80 Q15459
	EP1 EP10 EP11 EP12 EP2 EP5 EP7 EP8 EP9	1	P38606
	EP1 EP11 EP12 EP3 EP4 EP5 EP6 EP7 EP9	1	P61026
	EP1 EP10 EP11 EP12 EP3 EP4 EP5 EP6 EP7	1	P69891
	EP1 EP11 EP12 EP3 EP4 EP5 EP6 EP8 EP9	1	P46976
	EP1 EP10 EP11 EP12 EP3 EP4 EP5 EP6 EP9	1	Q92522
	EP1 EP10 EP11 EP3 EP4 EP5 EP7 EP8 EP9	2	P51608 P37840
	EP1 EP11 EP12 EP3 EP4 EP5 EP7 EP8 EP9	8	P31949 P07858 P62081 Q08380 P05109 Q9UJZ1 Q92597 P49748
	EP1 EP10 EP11 EP12 EP3 EP4 EP5 EP7 EP8	1	P09493
	EP1 EP10 EP11 EP12 EP3 EP4 EP5 EP7 EP9	1	Q01813
	EP1 EP10 EP11 EP12 EP3 EP4 EP5 EP8 EP9	2	O14773 P11940
	EP1 EP10 EP11 EP3 EP4 EP6 EP7 EP8 EP9	2	P08237 P62995
	EP1 EP10 EP12 EP3 EP4 EP6 EP7 EP8 EP9	2	P62304 P25788
	EP1 EP11 EP12 EP3 EP4 EP6 EP7 EP8 EP9	1	P60981
	EP1 EP10 EP11 EP12 EP3 EP4 EP6 EP7 EP8	2	P83916 O95202
	EP1 EP10 EP11 EP12 EP3 EP4 EP6 EP8 EP9	3	Q00688 Q99627 P01112
	EP1 EP10 EP11 EP12 EP3 EP4 EP7 EP8 EP9	3	P24752 P24539 Q9Y281
	EP1 EP10 EP11 EP3 EP5 EP6 EP7 EP8 EP9	1	P12111
	EP1 EP11 EP12 EP3 EP5 EP6 EP7 EP8 EP9	1	P08571
	EP1 EP10 EP11 EP12 EP3 EP5 EP6 EP7 EP9	1	P02751
	EP1 EP10 EP11 EP12 EP3 EP5 EP7 EP8 EP9	4	P00403 P05107 P00751 P08603
	EP1 EP10 EP11 EP4 EP5 EP6 EP7 EP8 EP9	3	O95292 Q9UMS4 O75643
	EP1 EP10 EP11 EP12 EP4 EP5 EP6 EP8 EP9	1	P61353
	EP1 EP10 EP11 EP12 EP4 EP5 EP7 EP8 EP9	1	P46783
	EP1 EP10 EP11 EP12 EP4 EP6 EP7 EP8 EP9	2	Q9Y266 Q00577
	EP11 EP12 EP2 EP3 EP4 EP5 EP6 EP7 EP9	2	P23229 O75891
	EP10 EP11 EP12 EP2 EP3 EP4 EP5 EP6 EP9	1	Q13509
	EP10 EP11 EP12 EP2 EP3 EP4 EP5 EP7 EP9	1	P01860
	EP10 EP11 EP12 EP2 EP3 EP4 EP5 EP8 EP9	1	Q9H4G4
	EP11 EP12 EP2 EP3 EP4 EP6 EP7 EP8 EP9	2	Q5KU26 Q6UXB8
	EP10 EP11 EP12 EP2 EP3 EP4 EP6 EP7 EP8	1	Q02252
	EP10 EP11 EP12 EP2 EP3 EP4 EP6 EP7 EP9	1	Q92823
	EP10 EP11 EP12 EP2 EP3 EP4 EP6 EP8 EP9	1	Q9P121
	EP11 EP12 EP2 EP3 EP5 EP6 EP7 EP8 EP9	2	Q8N6C5 P29972
	EP10 EP11 EP12 EP2 EP3 EP5 EP6 EP7 EP9	3	P13611 O14594 P24821
	EP11 EP12 EP2 EP4 EP5 EP6 EP7 EP8 EP9	1	Q02543
	EP10 EP11 EP12 EP2 EP4 EP5 EP6 EP7 EP9	1	Q13885
	EP10 EP12 EP3 EP4 EP5 EP6 EP7 EP8 EP9	1	O14602
	EP11 EP12 EP3 EP4 EP5 EP6 EP7 EP8 EP9	7	O75131 P21266 P0C0L5 P46781 P51178 Q16851 P07384
	EP10 EP11 EP12 EP3 EP4 EP5 EP6 EP7 EP9	1	Q15582
	EP10 EP11 EP12 EP3 EP4 EP5 EP6 EP8 EP9	4	P04217 P02774 Q9Y696 P16403
	EP10 EP11 EP12 EP3 EP4 EP5 EP7 EP8 EP9	9	P55145 Q6NZI2 P51884 P36269 P62753 P43121 Q13200 P52907 P51665
	EP10 EP11 EP12 EP3 EP4 EP6 EP7 EP8 EP9	17	P63010 Q96FW1 P16104 P62993 O00410 P62191 P62244 Q15181 P60983 Q9UJ70 Q15369 O94772 P61163 P54920 P23526 P22061 P14550
	EP10 EP11 EP12 EP3 EP5 EP6 EP7 EP8 EP9	3	Q86VB7 Q9H299 Q01469
	EP1 EP11 EP2 EP3 EP4 EP7 EP8 EP9	1	Q9H425
	EP1 EP10 EP12 EP2 EP3 EP6 EP7 EP8	1	P27361
	EP1 EP10 EP11 EP2 EP4 EP6 EP8 EP9	2	P98172 Q96B54
	EP1 EP10 EP11 EP2 EP4 EP7 EP8 EP9	5	Q9UQ35 Q07666 Q9BUJ2 Q9H307 Q9H3Q1
	EP1 EP10 EP11 EP2 EP5 EP6 EP7 EP9	1	P39023
	EP1 EP10 EP11 EP2 EP5 EP7 EP8 EP9	2	Q12888 Q14839
	EP1 EP10 EP3 EP4 EP6 EP7 EP8 EP9	1	P04350
	EP1 EP10 EP12 EP3 EP4 EP6 EP7 EP8	2	P38117 Q9BRA2
	EP1 EP11 EP12 EP3 EP4 EP6 EP7 EP8	2	Q9UNF0 P31937
	EP1 EP11 EP12 EP3 EP4 EP6 EP7 EP9	3	Q9UK22 P20073 P19367
	EP1 EP10 EP11 EP3 EP4 EP7 EP8 EP9	1	Q92598
	EP1 EP11 EP12 EP3 EP4 EP7 EP8 EP9	1	P23381
	EP1 EP10 EP11 EP12 EP3 EP4 EP7 EP8	1	P80404
	EP1 EP11 EP3 EP5 EP6 EP7 EP8 EP9	1	Q53GQ0
	EP1 EP12 EP3 EP5 EP6 EP7 EP8 EP9	1	P16671
	EP1 EP11 EP12 EP3 EP5 EP6 EP7 EP9	1	P02748
	EP1 EP10 EP11 EP3 EP5 EP7 EP8 EP9	2	P21810 O14880
	EP1 EP11 EP12 EP3 EP5 EP7 EP8 EP9	2	P60903 P08311
	EP1 EP10 EP11 EP12 EP3 EP5 EP8 EP9	1	Q14112
	EP1 EP10 EP11 EP3 EP6 EP7 EP8 EP9	1	P09622
	EP1 EP10 EP11 EP4 EP5 EP6 EP7 EP8	1	P26196
	EP1 EP10 EP11 EP4 EP5 EP6 EP8 EP9	1	P31943
	EP1 EP10 EP11 EP4 EP5 EP7 EP8 EP9	2	Q15029 Q8NFW8
	EP1 EP11 EP12 EP4 EP5 EP7 EP8 EP9	2	Q9P0V9 P62829
	EP1 EP10 EP11 EP12 EP4 EP5 EP8 EP9	3	Q13409 P60866 P67809
	EP1 EP10 EP11 EP4 EP6 EP7 EP8 EP9	9	Q16531 O43143 Q92747 Q16630 Q8NCW5 Q7Z4V5 P38919 P37108 P78347
	EP1 EP10 EP11 EP12 EP4 EP6 EP7 EP8	2	Q96AE4 P63172
	EP1 EP10 EP11 EP12 EP4 EP7 EP8 EP9	5	P62277 Q9Y5S9 Q8WXX5 Q01844 Q99729
	EP1 EP10 EP11 EP5 EP6 EP7 EP8 EP9	3	Q08945 Q8IYB3 P17844
	EP1 EP10 EP11 EP12 EP5 EP7 EP8 EP9	1	Q16891
	EP1 EP10 EP11 EP12 EP6 EP7 EP8 EP9	2	Q04837 Q9UNK0
	EP10 EP11 EP12 EP2 EP3 EP4 EP6 EP9	1	Q14194
	EP10 EP11 EP2 EP3 EP4 EP7 EP8 EP9	1	P35052
	EP11 EP12 EP2 EP3 EP4 EP7 EP8 EP9	1	Q9NYL9
	EP11 EP12 EP2 EP3 EP5 EP6 EP7 EP9	1	P16144
	EP10 EP11 EP2 EP3 EP5 EP7 EP8 EP9	1	P16615
	EP10 EP11 EP2 EP4 EP5 EP7 EP8 EP9	1	P22087
	EP10 EP11 EP12 EP2 EP4 EP5 EP8 EP9	1	Q9UBS4
	EP10 EP11 EP2 EP4 EP6 EP7 EP8 EP9	1	Q92499
	EP10 EP11 EP12 EP2 EP4 EP6 EP8 EP9	1	Q96PU8
	EP11 EP12 EP3 EP4 EP5 EP6 EP7 EP9	1	P17931
	EP11 EP12 EP3 EP4 EP5 EP6 EP8 EP9	1	O60814
	EP11 EP12 EP3 EP4 EP5 EP7 EP8 EP9	4	P43686 Q15363 P01903 P43490
	EP10 EP11 EP12 EP3 EP4 EP5 EP8 EP9	2	Q05682 P32969
	EP10 EP11 EP3 EP4 EP6 EP7 EP8 EP9	1	P09543
	EP11 EP12 EP3 EP4 EP6 EP7 EP8 EP9	1	P42785
	EP10 EP11 EP12 EP3 EP4 EP6 EP7 EP8	1	P51571
	EP10 EP11 EP12 EP3 EP4 EP6 EP7 EP9	3	O75874 O14907 Q8N0U8
	EP10 EP11 EP12 EP3 EP4 EP6 EP8 EP9	4	P49588 O43242 P52758 P53999
	EP10 EP11 EP12 EP3 EP4 EP7 EP8 EP9	4	Q07812 P36871 P30085 P54578
	EP10 EP11 EP12 EP3 EP5 EP6 EP7 EP8	1	O75390
	EP10 EP11 EP12 EP3 EP5 EP6 EP7 EP9	1	P19823
	EP10 EP11 EP12 EP3 EP5 EP7 EP8 EP9	1	P55268
	EP10 EP11 EP4 EP5 EP6 EP7 EP8 EP9	2	Q99460 Q9NZ08
	EP11 EP12 EP4 EP5 EP6 EP7 EP8 EP9	1	Q96AC1
	EP10 EP11 EP12 EP4 EP5 EP7 EP8 EP9	1	P04844
	EP10 EP11 EP12 EP4 EP6 EP7 EP8 EP9	7	Q9NWV4 P31939 Q96CX2 O43396 O95777 O95817 P49720
	EP10 EP11 EP12 EP5 EP6 EP7 EP8 EP9	3	P31930 P19652 P20645
	EP1 EP2 EP3 EP4 EP6 EP7 EP9	1	P17302
	EP1 EP12 EP2 EP3 EP4 EP6 EP8	1	Q9NZR1
	EP1 EP10 EP2 EP3 EP4 EP7 EP8	1	Q01484
	EP1 EP11 EP12 EP2 EP3 EP5 EP9	1	P05106
	EP1 EP10 EP11 EP2 EP4 EP5 EP8	1	Q9H1E3
	EP1 EP10 EP2 EP4 EP7 EP8 EP9	1	Q9UQE7
	EP1 EP12 EP2 EP4 EP7 EP8 EP9	1	P15328
	EP1 EP10 EP11 EP2 EP4 EP8 EP9	1	Q6UN15
	EP1 EP10 EP11 EP2 EP7 EP8 EP9	2	Q9NYF8 Q14165
	EP1 EP11 EP3 EP4 EP5 EP7 EP8	1	P00505
	EP1 EP12 EP3 EP4 EP5 EP7 EP9	1	Q04941
	EP1 EP10 EP3 EP4 EP6 EP7 EP8	1	P14927
	EP1 EP10 EP11 EP3 EP4 EP7 EP9	1	Q9H3N1
	EP1 EP11 EP12 EP3 EP4 EP8 EP9	1	P36543
	EP1 EP11 EP12 EP3 EP5 EP6 EP9	1	O95741
	EP1 EP11 EP12 EP3 EP5 EP7 EP9	2	P00747 P02730
	EP1 EP10 EP11 EP12 EP3 EP7 EP8	1	Q765P7
	EP1 EP10 EP4 EP5 EP7 EP8 EP9	1	P17480
	EP1 EP11 EP4 EP5 EP7 EP8 EP9	1	Q8NBS9
	EP1 EP10 EP11 EP4 EP5 EP8 EP9	2	Q8TEA8 P20042
	EP1 EP10 EP4 EP6 EP7 EP8 EP9	1	Q9Y224
	EP1 EP10 EP11 EP4 EP6 EP7 EP8	3	P36969 Q6P4E1 Q14498
	EP1 EP10 EP12 EP4 EP6 EP7 EP8	1	P42126
	EP1 EP10 EP11 EP4 EP6 EP8 EP9	2	O75347 P23434
	EP1 EP10 EP12 EP4 EP6 EP8 EP9	1	O43865
	EP1 EP10 EP11 EP4 EP7 EP8 EP9	8	O75533 P38159 Q53GS9 Q9NQG5 Q96I24 Q13435 Q9NQ29 O95232
	EP1 EP10 EP11 EP12 EP4 EP7 EP8	2	Q9Y2B0 P11177
	EP1 EP10 EP11 EP12 EP4 EP8 EP9	1	Q9BZZ5
	EP1 EP11 EP12 EP5 EP6 EP7 EP8	1	O43657
	EP1 EP10 EP11 EP5 EP6 EP8 EP9	1	P12004
	EP1 EP10 EP11 EP5 EP7 EP8 EP9	1	Q02880
	EP1 EP10 EP11 EP6 EP7 EP8 EP9	2	P41091 Q05519
	EP1 EP10 EP11 EP12 EP7 EP8 EP9	1	Q08257
	EP2 EP3 EP4 EP6 EP7 EP8 EP9	1	P08754
	EP11 EP12 EP2 EP3 EP4 EP7 EP8	1	P14209
	EP11 EP12 EP2 EP3 EP6 EP7 EP9	1	Q16620
	EP11 EP12 EP2 EP3 EP6 EP8 EP9	1	O14672
	EP10 EP11 EP12 EP2 EP4 EP5 EP8	1	Q8NC51
	EP10 EP11 EP2 EP4 EP7 EP8 EP9	1	P11137
	EP11 EP12 EP2 EP4 EP7 EP8 EP9	1	P62906
	EP10 EP11 EP12 EP2 EP4 EP7 EP8	1	O00451
	EP10 EP11 EP2 EP5 EP6 EP7 EP9	1	P46776
	EP11 EP12 EP2 EP5 EP6 EP7 EP9	1	P61313
	EP10 EP11 EP2 EP5 EP7 EP8 EP9	1	Q00325
	EP10 EP11 EP12 EP2 EP7 EP8 EP9	1	P39656
	EP12 EP3 EP4 EP5 EP7 EP8 EP9	1	P13473
	EP10 EP11 EP3 EP4 EP5 EP7 EP8	1	P51648
	EP11 EP12 EP3 EP4 EP5 EP7 EP9	4	P05164 P08246 P61769 P49913
	EP10 EP11 EP3 EP4 EP5 EP8 EP9	1	P50895
	EP10 EP11 EP12 EP3 EP4 EP5 EP9	1	P10451
	EP11 EP3 EP4 EP6 EP7 EP8 EP9	1	P62745
	EP10 EP11 EP3 EP4 EP6 EP7 EP8	1	Q16658
	EP11 EP12 EP3 EP4 EP6 EP7 EP8	2	P28161 P50213
	EP11 EP12 EP3 EP4 EP6 EP7 EP9	2	P06756 P36959
	EP10 EP11 EP3 EP4 EP6 EP8 EP9	1	Q9Y2S2
	EP11 EP12 EP3 EP4 EP6 EP8 EP9	3	Q8WZA0 P06899 P50148
	EP10 EP11 EP3 EP4 EP7 EP8 EP9	2	P68402 Q9UHG3
	EP10 EP12 EP3 EP4 EP7 EP8 EP9	2	O15145 P53990
	EP11 EP12 EP3 EP4 EP7 EP8 EP9	5	Q99961 P62854 Q92599 P40261 Q9H0R4
	EP10 EP11 EP12 EP3 EP4 EP7 EP8	1	P24666
	EP10 EP11 EP12 EP3 EP4 EP7 EP9	2	P50914 Q02952
	EP10 EP11 EP12 EP3 EP4 EP8 EP9	4	Q15631 P54725 Q9UHY7 P49773
	EP11 EP12 EP3 EP5 EP6 EP7 EP9	1	P19827
	EP10 EP11 EP3 EP5 EP7 EP8 EP9	1	P12110
	EP11 EP12 EP3 EP5 EP7 EP8 EP9	3	Q14315 Q14624 P05362
	EP10 EP11 EP12 EP3 EP5 EP7 EP9	3	P11047 Q99623 P14543
	EP10 EP11 EP12 EP3 EP6 EP8 EP9	1	P53004
	EP12 EP4 EP5 EP6 EP7 EP8 EP9	1	Q14019
	EP10 EP11 EP4 EP5 EP7 EP8 EP9	2	Q9Y2X3 P0DP23
	EP11 EP12 EP4 EP5 EP7 EP8 EP9	3	P13796 Q9BS26 P01859
	EP10 EP11 EP4 EP6 EP7 EP8 EP9	1	O14980
	EP10 EP12 EP4 EP6 EP7 EP8 EP9	1	O00231
	EP11 EP12 EP4 EP6 EP7 EP8 EP9	1	Q9UNM6
	EP10 EP11 EP12 EP4 EP6 EP8 EP9	1	P28070
	EP10 EP11 EP12 EP4 EP7 EP8 EP9	10	O43583 P21281 Q9NUQ9 P62195 P09661 P52566 Q15370 P56537 P07203 Q92734
	EP11 EP12 EP5 EP6 EP7 EP8 EP9	1	P05156
	EP10 EP11 EP12 EP5 EP7 EP8 EP9	1	O75955
	EP10 EP11 EP12 EP6 EP7 EP8 EP9	1	Q9UEU0
	EP1 EP12 EP2 EP3 EP6 EP8	1	P15259
	EP1 EP10 EP2 EP4 EP8 EP9	1	Q14683
	EP1 EP10 EP2 EP6 EP7 EP8	1	Q13247
	EP1 EP10 EP11 EP2 EP6 EP7	1	O00461
	EP1 EP10 EP2 EP7 EP8 EP9	1	Q96PK6
	EP1 EP10 EP11 EP2 EP7 EP8	1	P50402
	EP1 EP10 EP11 EP12 EP2 EP7	1	Q8NBX0
	EP1 EP10 EP11 EP2 EP8 EP9	1	Q14938
	EP1 EP3 EP4 EP5 EP7 EP8	1	Q9UBX5
	EP1 EP11 EP3 EP4 EP5 EP7	1	P07099
	EP1 EP11 EP3 EP4 EP7 EP8	1	O76041
	EP1 EP12 EP3 EP4 EP7 EP8	1	Q9H008
	EP1 EP10 EP3 EP5 EP6 EP7	1	P08134
	EP1 EP11 EP12 EP3 EP5 EP7	1	P02776
	EP1 EP10 EP11 EP3 EP7 EP8	1	Q14008
	EP1 EP10 EP11 EP4 EP5 EP8	1	P82979
	EP1 EP12 EP4 EP6 EP7 EP8	1	Q9NX40
	EP1 EP10 EP11 EP4 EP7 EP8	4	Q14157 P84090 Q02818 O00217
	EP1 EP11 EP12 EP4 EP7 EP8	1	P30084
	EP1 EP10 EP11 EP4 EP8 EP9	3	Q8WXF1 Q00059 O43290
	EP1 EP11 EP12 EP4 EP8 EP9	1	P30042
	EP1 EP10 EP11 EP12 EP4 EP8	1	Q13596
	EP1 EP10 EP11 EP5 EP7 EP8	1	Q9Y5B9
	EP1 EP10 EP11 EP7 EP8 EP9	4	O96019 P11387 P42224 P0DN76
	EP1 EP10 EP11 EP12 EP8 EP9	1	Q8TAQ2
	EP12 EP2 EP3 EP4 EP7 EP8	1	P50995
	EP11 EP12 EP2 EP3 EP7 EP8	1	P30038
	EP11 EP2 EP4 EP5 EP7 EP8	1	Q9Y3Z3
	EP11 EP2 EP4 EP7 EP8 EP9	1	P78324
	EP10 EP11 EP2 EP4 EP7 EP9	1	Q14847
	EP10 EP11 EP2 EP4 EP8 EP9	3	P49006 Q12874 O15355
	EP10 EP11 EP12 EP2 EP4 EP9	1	P49327
	EP12 EP2 EP5 EP6 EP8 EP9	1	P68431
	EP11 EP12 EP3 EP4 EP5 EP8	1	P02511
	EP11 EP12 EP3 EP4 EP5 EP9	1	P36222
	EP10 EP3 EP4 EP6 EP7 EP8	1	Q9UHD9
	EP10 EP11 EP3 EP4 EP6 EP7	1	Q96DH6
	EP11 EP3 EP4 EP6 EP8 EP9	1	Q9Y4F1
	EP12 EP3 EP4 EP6 EP8 EP9	1	Q9Y5Z4
	EP10 EP12 EP3 EP4 EP6 EP9	1	Q15819
	EP11 EP3 EP4 EP7 EP8 EP9	1	P23588
	EP12 EP3 EP4 EP7 EP8 EP9	2	P14174 P59998
	EP10 EP11 EP3 EP4 EP7 EP8	2	O60716 P62266
	EP11 EP12 EP3 EP4 EP7 EP8	1	P54819
	EP11 EP12 EP3 EP4 EP7 EP9	2	Q8IVF2 P01619
	EP10 EP11 EP3 EP4 EP8 EP9	1	O43237
	EP10 EP12 EP3 EP4 EP8 EP9	1	P61970
	EP11 EP12 EP3 EP4 EP8 EP9	1	P55957
	EP12 EP3 EP5 EP7 EP8 EP9	1	P07711
	EP10 EP12 EP3 EP5 EP7 EP9	1	P02743
	EP11 EP12 EP3 EP5 EP7 EP9	4	P02760 P01031 P26022 P20036
	EP11 EP12 EP3 EP6 EP8 EP9	1	Q15075
	EP11 EP12 EP3 EP7 EP8 EP9	4	P13716 Q9NX63 Q9UFN0 P04233
	EP10 EP11 EP4 EP5 EP7 EP9	1	P05067
	EP10 EP11 EP4 EP5 EP8 EP9	1	P49321
	EP10 EP12 EP4 EP5 EP8 EP9	1	P63173
	EP12 EP4 EP6 EP7 EP8 EP9	1	P36957
	EP10 EP11 EP4 EP6 EP8 EP9	2	P28072 Q9UBB4
	EP11 EP12 EP4 EP6 EP8 EP9	2	O00764 Q9ULC3
	EP10 EP11 EP12 EP4 EP6 EP8	1	P51649
	EP10 EP11 EP4 EP7 EP8 EP9	7	Q969H8 Q969G3 O14744 P35998 P09012 P31689 O00567
	EP10 EP12 EP4 EP7 EP8 EP9	1	Q9Y4E1
	EP11 EP12 EP4 EP7 EP8 EP9	7	P61077 Q9UBQ0 P21399 O95782 Q9H444 Q9BUL8 Q13630
	EP10 EP11 EP12 EP4 EP7 EP8	3	Q15427 Q9NS69 O43809
	EP10 EP11 EP12 EP4 EP8 EP9	7	O43399 P61601 Q9NZZ3 Q96G03 Q9UL25 Q9Y3F4 O94903
	EP11 EP12 EP5 EP6 EP7 EP9	2	P23142 P10915
	EP11 EP12 EP5 EP6 EP8 EP9	1	Q9NQX7
	EP11 EP12 EP5 EP7 EP8 EP9	3	P31146 O15143 P28676
	EP10 EP11 EP12 EP5 EP7 EP9	2	P98160 P08572
	EP10 EP11 EP12 EP7 EP8 EP9	1	P54709
	EP1 EP10 EP11 EP2 EP3	1	P01116
	EP1 EP10 EP2 EP4 EP8	1	P40855
	EP1 EP10 EP2 EP7 EP8	4	Q13523 Q15287 Q2TAY7 Q8IX01
	EP1 EP10 EP12 EP2 EP9	1	P0C0L4
	EP1 EP3 EP4 EP6 EP7	1	P11217
	EP1 EP3 EP6 EP7 EP8	1	Q14240
	EP1 EP3 EP6 EP8 EP9	1	O94856
	EP1 EP10 EP3 EP7 EP8	1	Q7Z3B1
	EP1 EP4 EP6 EP8 EP9	1	P61201
	EP1 EP4 EP7 EP8 EP9	1	P35612
	EP1 EP10 EP4 EP7 EP8	3	Q13243 Q9UMX5 O60784
	EP1 EP10 EP11 EP4 EP7	1	O75396
	EP1 EP11 EP4 EP8 EP9	1	P20810
	EP1 EP10 EP11 EP4 EP8	3	Q9Y2W2 Q8N1G4 Q9UKM9
	EP1 EP10 EP11 EP4 EP9	1	Q9HB71
	EP1 EP6 EP7 EP8 EP9	1	Q8WWI5
	EP1 EP10 EP6 EP7 EP8	2	Q13242 P62310
	EP1 EP11 EP6 EP7 EP9	1	Q13491
	EP1 EP10 EP7 EP8 EP9	3	Q7L775 Q9BUR5 Q13595
	EP1 EP11 EP7 EP8 EP9	1	P78559
	EP1 EP10 EP11 EP7 EP8	2	O75400 P18583
	EP1 EP11 EP12 EP7 EP8	1	Q9H3G5
	EP1 EP10 EP11 EP8 EP9	2	P61923 Q49A26
	EP11 EP2 EP3 EP4 EP9	1	Q16527
	EP11 EP2 EP3 EP6 EP9	1	Q8NFZ8
	EP10 EP2 EP3 EP7 EP9	1	P69892
	EP12 EP2 EP3 EP8 EP9	1	P07451
	EP2 EP4 EP6 EP7 EP8	1	Q13641
	EP11 EP2 EP4 EP6 EP8	1	Q9UQB3
	EP10 EP11 EP2 EP4 EP6	1	P13726
	EP10 EP2 EP4 EP7 EP8	1	P22748
	EP11 EP2 EP4 EP8 EP9	1	P63220
	EP10 EP11 EP2 EP4 EP9	2	O15031 P10636
	EP10 EP11 EP2 EP5 EP9	1	P02786
	EP12 EP2 EP6 EP7 EP8	1	Q8N2G4
	EP10 EP2 EP6 EP7 EP9	1	P53801
	EP10 EP2 EP6 EP8 EP9	1	O75487
	EP11 EP2 EP7 EP8 EP9	1	Q9BUF5
	EP10 EP11 EP2 EP7 EP8	1	P53621
	EP10 EP11 EP2 EP8 EP9	1	P55081
	EP10 EP11 EP12 EP2 EP8	1	P33176
	EP10 EP3 EP4 EP5 EP8	1	P30493
	EP3 EP4 EP6 EP8 EP9	1	P28074
	EP10 EP3 EP4 EP7 EP8	1	Q8N5K1
	EP11 EP3 EP4 EP7 EP8	1	P60891
	EP12 EP3 EP4 EP8 EP9	1	P62841
	EP10 EP12 EP3 EP4 EP8	2	O43633 Q7L1Q6
	EP11 EP12 EP3 EP4 EP8	1	Q8WUM4
	EP11 EP12 EP3 EP4 EP9	1	P17174
	EP12 EP3 EP5 EP6 EP7	1	P62714
	EP12 EP3 EP5 EP6 EP9	1	P11908
	EP11 EP3 EP5 EP7 EP9	3	Q03135 P16157 P11166
	EP12 EP3 EP5 EP7 EP9	1	P08697
	EP11 EP12 EP3 EP5 EP7	2	P24844 P07996
	EP11 EP12 EP3 EP5 EP9	1	P04114
	EP10 EP11 EP12 EP3 EP5	1	P18085
	EP10 EP3 EP6 EP7 EP8	1	P37235
	EP10 EP11 EP3 EP6 EP7	1	Q9BRX8
	EP10 EP12 EP3 EP6 EP7	1	Q99613
	EP11 EP3 EP6 EP8 EP9	1	Q15286
	EP11 EP12 EP3 EP7 EP8	1	P28065
	EP11 EP12 EP3 EP7 EP9	1	Q14764
	EP10 EP11 EP12 EP3 EP8	1	Q04637
	EP10 EP11 EP4 EP5 EP8	1	Q9Y3E1
	EP10 EP11 EP4 EP5 EP9	1	P62280
	EP10 EP4 EP6 EP7 EP8	1	P00390
	EP12 EP4 EP6 EP7 EP9	1	P01111
	EP12 EP4 EP6 EP8 EP9	2	Q9Y3E7 Q9UH03
	EP10 EP11 EP4 EP6 EP8	3	Q5T1J5 P09417 Q09028
	EP10 EP12 EP4 EP6 EP9	1	Q96CN7
	EP10 EP4 EP7 EP8 EP9	1	O94906
	EP11 EP4 EP7 EP8 EP9	4	Q9ULC4 P40763 Q13404 P61960
	EP12 EP4 EP7 EP8 EP9	2	O43324 P41250
	EP10 EP11 EP4 EP7 EP8	5	Q5JSH3 Q9BXP5 Q96ST2 Q9BXK5 O60216
	EP10 EP12 EP4 EP7 EP8	2	Q9UHV9 O96000
	EP11 EP12 EP4 EP7 EP8	2	Q9BX66 Q7KZF4
	EP10 EP11 EP4 EP7 EP9	2	P05204 Q9NPH2
	EP10 EP12 EP4 EP7 EP9	1	P10644
	EP11 EP12 EP4 EP7 EP9	2	O00560 Q00169
	EP10 EP11 EP4 EP8 EP9	9	Q9UBE0 P22102 P13861 O60828 Q16881 Q96CT7 Q14978 P62316 P67775
	EP10 EP12 EP4 EP8 EP9	1	Q2TAA2
	EP11 EP12 EP4 EP8 EP9	2	Q13126 Q15435
	EP10 EP11 EP12 EP4 EP8	1	O43181
	EP10 EP11 EP12 EP4 EP9	3	Q9NR31 Q8N8S7 Q14515
	EP10 EP5 EP6 EP7 EP9	1	P81605
	EP11 EP5 EP7 EP8 EP9	2	Q14554 Q13162
	EP10 EP11 EP5 EP7 EP8	1	Q9P035
	EP11 EP12 EP5 EP7 EP8	1	Q6UW68
	EP10 EP11 EP5 EP7 EP9	2	Q14254 Q96AY3
	EP11 EP12 EP5 EP7 EP9	2	P41218 P11215
	EP10 EP11 EP12 EP5 EP8	1	Q16270
	EP10 EP11 EP12 EP5 EP9	1	P02462
	EP11 EP12 EP6 EP8 EP9	2	O75436 O15484
	EP10 EP11 EP12 EP6 EP9	1	Q9Y6R7
	EP10 EP11 EP7 EP8 EP9	3	Q9NTI5 P55060 Q99873
	EP10 EP12 EP7 EP8 EP9	1	Q92973
	EP11 EP12 EP7 EP8 EP9	2	P11413 P12268
	EP10 EP11 EP12 EP7 EP8	2	P54136 P25445
	EP10 EP11 EP12 EP7 EP9	1	O94973
	EP10 EP11 EP12 EP8 EP9	2	Q14152 Q96QR8
	EP1 EP10 EP2 EP5	1	Q9Y624
	EP1 EP2 EP7 EP8	1	Q5IJ48
	EP1 EP10 EP2 EP7	2	P23527 Q8NC56
	EP1 EP3 EP4 EP8	1	P20674
	EP1 EP12 EP4 EP5	1	P26373
	EP1 EP10 EP4 EP6	1	Q8N111
	EP1 EP4 EP7 EP8	2	P28289 Q3LXA3
	EP1 EP10 EP4 EP8	2	O75886 Q9H4A4
	EP1 EP12 EP4 EP8	1	Q12931
	EP1 EP12 EP4 EP9	1	O60888
	EP1 EP11 EP5 EP8	1	P62314
	EP1 EP6 EP7 EP8	1	P61457
	EP1 EP7 EP8 EP9	1	Q9HCC8
	EP1 EP10 EP7 EP8	2	Q8WWQ0 Q13308
	EP1 EP11 EP7 EP8	1	P62750
	EP1 EP10 EP7 EP9	1	P84098
	EP1 EP11 EP7 EP9	1	Q9NZ45
	EP1 EP10 EP8 EP9	3	O15126 P42766 O43684
	EP1 EP11 EP8 EP9	2	Q9H3Z4 Q9UDT6
	EP1 EP10 EP11 EP8	4	P49750 Q9Y6X4 Q9NYB0 Q9UHA4
	EP1 EP10 EP12 EP8	1	Q8N684
	EP1 EP11 EP12 EP9	2	P08574 P62917
	EP2 EP3 EP7 EP9	1	P02656
	EP12 EP2 EP3 EP9	1	Q96FZ7
	EP2 EP4 EP7 EP8	1	P05090
	EP2 EP4 EP7 EP9	1	P04156
	EP10 EP2 EP4 EP8	1	O95218
	EP10 EP11 EP2 EP4	1	Q8IZP0
	EP11 EP12 EP2 EP4	1	O00151
	EP2 EP6 EP8 EP9	1	O75056
	EP10 EP2 EP7 EP8	1	P17568
	EP10 EP11 EP2 EP8	1	Q9P258
	EP10 EP11 EP2 EP9	1	Q13177
	EP3 EP4 EP6 EP7	1	P42330
	EP3 EP4 EP6 EP9	1	P78310
	EP12 EP3 EP4 EP6	1	Q96FQ6
	EP11 EP3 EP4 EP7	1	Q14914
	EP10 EP3 EP4 EP8	1	Q8N568
	EP11 EP3 EP4 EP8	1	Q9NVD7
	EP12 EP3 EP4 EP8	1	Q8TCD5
	EP11 EP3 EP4 EP9	1	P07108
	EP10 EP11 EP3 EP4	1	Q9NP97
	EP10 EP12 EP3 EP4	1	P11171
	EP12 EP3 EP5 EP6	1	Q96E39
	EP3 EP5 EP7 EP9	1	P02549
	EP12 EP3 EP6 EP7	1	Q9Y2J8
	EP3 EP7 EP8 EP9	1	P55735
	EP11 EP12 EP3 EP9	1	P01033
	EP4 EP5 EP7 EP8	1	P07311
	EP4 EP5 EP7 EP9	1	Q9BWS9
	EP11 EP4 EP5 EP7	1	Q10567
	EP10 EP4 EP5 EP9	1	P01861
	EP11 EP12 EP4 EP5	1	Q99829
	EP10 EP4 EP6 EP7	1	P35244
	EP11 EP4 EP6 EP8	1	Q14160
	EP11 EP4 EP6 EP9	1	P25325
	EP10 EP4 EP7 EP8	6	Q13057 Q53EL6 Q9Y6I3 P19525 Q969E4 O14776
	EP11 EP4 EP7 EP8	2	P28331 Q9Y6B6
	EP12 EP4 EP7 EP8	3	Q99614 Q9ULZ3 Q9Y376
	EP11 EP12 EP4 EP7	1	O00303
	EP10 EP4 EP8 EP9	3	Q15102 Q7L5N1 P62899
	EP11 EP4 EP8 EP9	7	Q9UMX0 O00232 O75937 P16930 Q12904 P26639 Q99436
	EP12 EP4 EP8 EP9	2	P55058 P78417
	EP10 EP11 EP4 EP8	10	P16949 Q13442 Q02790 O75940 Q14353 Q9NRR5 O43347 P62633 Q92575 Q9Y2Z0
	EP10 EP12 EP4 EP8	2	P98179 P09132
	EP11 EP12 EP4 EP8	3	P52306 Q9H4M9 P20290
	EP10 EP11 EP4 EP9	1	Q9NY47
	EP11 EP12 EP4 EP9	3	P49591 Q9BPU6 Q9BWD1
	EP10 EP11 EP12 EP4	1	Q9Y371
	EP5 EP7 EP8 EP9	1	P08779
	EP11 EP5 EP7 EP8	2	P08123 P02452
	EP12 EP5 EP7 EP8	2	P02753 P13761
	EP11 EP5 EP7 EP9	2	Q9NYU2 P11277
	EP12 EP5 EP7 EP9	3	P27169 P08575 P05546
	EP10 EP11 EP5 EP9	1	Q12907
	EP11 EP12 EP5 EP9	9	A0A0A0MRZ8 P01700 P30740 P09871 P00736 P14780 P61626 P80188 P13671
	EP10 EP11 EP12 EP5	1	P16284
	EP10 EP6 EP7 EP8	1	P23470
	EP11 EP6 EP7 EP8	1	Q7Z6Z7
	EP12 EP6 EP7 EP8	1	P00966
	EP11 EP6 EP7 EP9	1	P61225
	EP12 EP6 EP7 EP9	1	Q96CW1
	EP10 EP6 EP8 EP9	1	Q15049
	EP11 EP12 EP6 EP9	1	P51531
	EP10 EP7 EP8 EP9	3	P54105 Q9BUH6 Q92542
	EP11 EP7 EP8 EP9	1	O95433
	EP12 EP7 EP8 EP9	1	Q9BPX5
	EP10 EP11 EP7 EP8	9	Q9BVG4 Q13576 O00571 Q8IX12 Q86U42 O14561 Q9H1E5 Q99459 Q93009
	EP10 EP12 EP7 EP8	1	P51659
	EP11 EP12 EP7 EP8	5	P27701 P84095 O00534 Q96C19 P48444
	EP10 EP11 EP7 EP9	1	P30453
	EP11 EP12 EP7 EP9	1	P19971
	EP10 EP11 EP8 EP9	3	Q9UN86 Q9Y2A7 Q96ME7
	EP11 EP12 EP8 EP9	2	Q9NR45 P17050
	EP10 EP11 EP12 EP8	1	P40121
	EP1 EP2 EP4	1	O94819
	EP1 EP2 EP7	2	Q01130 P62913
	EP1 EP10 EP2	1	P58876
	EP1 EP4 EP8	2	Q9NUJ1 Q15785
	EP1 EP5 EP8	1	Q13418
	EP1 EP11 EP5	1	P07951
	EP1 EP7 EP8	11	Q8WVF1 Q9HB40 Q7Z406 P62495 O94874 O00139 Q5BKZ1 O75602 O95183 Q8WYR4 Q9UHQ9
	EP1 EP7 EP9	3	O95197 P30273 P14406
	EP1 EP10 EP8	5	Q9H0Q3 Q9NS86 O00193 Q8WVK2 Q14966
	EP1 EP11 EP8	2	Q8NE71 P18859
	EP1 EP10 EP9	1	P20338
	EP11 EP2 EP3	1	P02795
	EP2 EP4 EP6	1	P01034
	EP2 EP4 EP7	2	Q06481 Q7Z7K6
	EP2 EP4 EP8	2	Q8N4V1 Q9GZT4
	EP11 EP2 EP4	1	P15104
	EP11 EP2 EP5	1	P35555
	EP2 EP6 EP7	1	P48509
	EP10 EP2 EP8	4	Q66PJ3 Q7L4I2 Q14151 Q9NQ34
	EP11 EP2 EP8	1	Q96KR1
	EP3 EP4 EP6	1	Q13557
	EP3 EP4 EP7	1	P23297
	EP3 EP4 EP8	3	Q00796 P61081 P99999
	EP3 EP4 EP9	1	O76054
	EP10 EP3 EP7	1	Q15388
	EP11 EP3 EP8	1	O75381
	EP10 EP3 EP9	1	P02724
	EP11 EP3 EP9	1	P21589
	EP12 EP3 EP9	2	Q15274 P20039
	EP10 EP11 EP3	1	Q9Y3A6
	EP11 EP12 EP3	1	Q96TA1
	EP4 EP5 EP7	1	Q12805
	EP4 EP6 EP8	2	P15374 P28907
	EP4 EP7 EP8	15	P80303 Q9UBW8 O00233 Q15124 O14974 Q9Y6E0 Q8N8N7 Q99471 O14653 Q99747 P52815 P19404 Q00765 Q9H4G0 P00352
	EP4 EP7 EP9	1	Q6Y288
	EP10 EP4 EP7	1	O75122
	EP11 EP4 EP7	2	P29992 Q99426
	EP4 EP8 EP9	4	O00499 P25786 Q13098 Q9H488
	EP10 EP4 EP8	10	P55809 Q13428 Q9H8Y8 P23193 O95400 Q9UI30 Q86SX6 P25685 Q8WWY3 Q9NQW7
	EP11 EP4 EP8	12	Q4G0N4 Q96F85 O75822 Q15637 O76094 Q7L266 Q9NSD9 P62070 O00244 Q9UBC2 P06730 P46937
	EP12 EP4 EP8	5	Q06124 Q9Y5X3 P49354 Q9BY43 Q15006
	EP12 EP4 EP9	2	Q9ULA0 P12081
	EP10 EP11 EP4	3	Q9H479 Q9H9B4 Q92520
	EP11 EP12 EP4	2	Q9NR46 P09110
	EP5 EP7 EP9	3	P02746 P06681 P02747
	EP10 EP5 EP7	1	Q02978
	EP12 EP5 EP7	2	P04839 Q86UX7
	EP5 EP8 EP9	1	P46063
	EP11 EP5 EP9	1	P13674
	EP12 EP5 EP9	2	P10643 P12429
	EP10 EP11 EP5	3	P21246 Q13724 Q8WY22
	EP11 EP12 EP5	2	P17213 P24158
	EP6 EP7 EP9	1	P46439
	EP11 EP6 EP7	1	O75695
	EP6 EP8 EP9	1	P54289
	EP10 EP6 EP8	3	Q9UBP4 Q9BR76 P62910
	EP10 EP6 EP9	1	Q96FC7
	EP11 EP6 EP9	1	P98095
	EP10 EP11 EP6	1	P60201
	EP7 EP8 EP9	3	Q16401 Q16576 P36542
	EP10 EP7 EP8	9	Q9BSJ8 Q7L014 P49756 A1L0T0 Q8IXT5 Q13123 Q7Z7H5 Q9HCD5 Q9HC78
	EP11 EP7 EP8	3	O94979 P53618 Q92900
	EP12 EP7 EP8	4	Q6YN16 Q92882 P00492 O60613
	EP10 EP7 EP9	2	P12273 P60468
	EP11 EP7 EP9	1	Q12797
	EP12 EP7 EP9	5	Q10588 Q96HE7 P0DJI8 P35542 Q06033
	EP10 EP11 EP7	2	P53007 O14531
	EP10 EP8 EP9	2	Q9UBT2 P55884
	EP11 EP8 EP9	6	O60763 O43504 P04062 Q9UNS2 Q9GZP4 O95373
	EP10 EP11 EP8	16	P42765 P51610 O43493 P62136 Q7RTV0 Q96DI7 Q92769 P40424 P07814 P49915 O00629 Q01085 P23368 O60264 P35606 O14737
	EP10 EP12 EP8	1	Q9C0E8
	EP11 EP12 EP8	4	Q9HAT2 O75832 Q9NY33 O00429
	EP10 EP11 EP9	5	P27694 Q13363 Q9BTV4 Q9NVJ2 P17677
	EP11 EP12 EP9	7	Q9UGT4 P01624 P23083 Q01628 A0A0C4DH38 P06737 P42025
	EP10 EP11 EP12	1	P62263
	EP1 EP2	3	P62491 P10412 Q5JRA6
	EP1 EP3	1	P08294
	EP1 EP4	1	Q9Y3C8
	EP1 EP5	1	P04439
	EP1 EP7	11	P22570 Q8N392 Q5TD94 Q9UPY8 P58107 A6NCE7 P57105 Q8TEF2 O95834 Q8NHG7 Q8N0X7
	EP1 EP8	9	P61764 Q96C74 Q9UBK7 Q13427 Q9H7X7 Q8TD06 Q12824 Q9C040 P32856
	EP1 EP10	2	Q96EP5 P62861
	EP1 EP11	2	Q96BJ3 Q96BM9
	EP2 EP4	1	Q8N7J2
	EP2 EP6	1	Q92752
	EP2 EP7	2	Q96HN2 O00168
	EP2 EP8	1	P20020
	EP2 EP9	1	Q9H4F8
	EP11 EP2	2	P80297 Q01974
	EP3 EP4	3	Q96IU4 P17252 P31947
	EP3 EP5	1	Q15063
	EP3 EP8	1	O94919
	EP3 EP9	2	P30491 P16452
	EP10 EP3	1	P22676
	EP11 EP3	1	Q9UKK9
	EP4 EP5	1	P07093
	EP4 EP6	3	Q9P2R7 P0DN79 Q8N3E9
	EP4 EP7	15	P31040 Q9BXW6 P55263 Q96HR9 P55083 Q9Y3D6 P09497 Q15811 Q9NTZ6 P12235 P61006 Q9BRT3 Q9H0E2 Q16718 Q99653
	EP4 EP8	38	Q8WVJ2 Q16625 P41223 Q16762 P50150 Q9Y315 P36507 Q7Z434 P35270 P37198 Q9H0W9 Q9Y5L4 Q15041 Q66K74 Q16186 Q6NVY1 Q15382 P78330 Q9H2U2 Q9Y4J8 Q8N6N7 Q8NI22 Q13555 P07919 Q9UEE9 O14964 Q9H9S4 Q8TDQ7 Q9Y3X0 Q9H074 O14787 P34949 P08579 Q13217 P52594 P33240 Q96P16 P53992
	EP4 EP9	2	P04229 Q99598
	EP10 EP4	8	Q5H9L2 Q96RT1 Q7Z417 Q9UH99 P11182 Q92783 Q7Z4W1 Q9BQI0
	EP11 EP4	8	Q13424 P54577 Q96FJ2 O60256 O43924 O60884 P35269 Q9H3P7
	EP12 EP4	7	P30405 Q9Y5K8 P24593 Q9BQE5 P62942 Q9UBQ5 P41567
	EP5 EP7	5	P20851 P47985 P35749 Q8WZ42 P15153
	EP5 EP8	2	Q9UBG0 P51570
	EP5 EP9	5	P07358 P53396 P43652 P01591 P11169
	EP10 EP5	1	P09488
	EP11 EP5	8	Q9ULV4 Q16363 P00748 O43854 P08514 P07942 P08567 P02775
	EP12 EP5	5	P31997 P18428 P07225 P25311 P00742
	EP6 EP7	3	Q9H361 P63096 P16188
	EP6 EP8	1	P15121
	EP6 EP9	5	Q6UXS0 Q6UVY6 P29762 P14324 P17301
	EP10 EP6	1	Q9NUB1
	EP7 EP8	31	P18463 Q9BUQ8 P53041 P14207 Q92878 P30876 Q8NBJ7 Q15436 P50440 P32455 P62330 P11532 Q8WVY7 Q9UJ90 Q15506 Q92692 Q8NHP8 Q9UIL1 Q9NT62 P63151 A6NHR9 P49959 Q15020 O60762 Q9BVC6 P29590 Q9Y6M9 Q92616 Q9HB07 Q9Y2Q3 Q9Y2T3
	EP7 EP9	3	Q15067 P22352 P13164
	EP10 EP7	6	P61266 P25686 Q9NZ43 O95563 Q8WVC0 P62857
	EP11 EP7	15	P21980 P01911 P30508 Q15599 Q9Y6W5 Q9UBR2 O15533 E9PAV3 Q9NRQ2 O43617 P48147 O95881 P10321 Q8IWI9 Q96M27
	EP12 EP7	8	P33121 Q08722 P30479 Q9BV40 P26447 P20292 Q5XKP0 Q70UQ0
	EP8 EP9	12	P48637 Q96AB3 P15289 Q9NXG2 O60493 Q9NP79 Q13618 Q9NT99 P35414 Q9P2T1 Q9UHQ4 Q13740
	EP10 EP8	19	P42704 P51532 Q9NX05 P24928 Q13330 Q86W42 Q8N6H7 Q12800 Q9UPT8 Q9UIG0 Q7Z3K3 P41217 Q96T23 O60832 Q9H6Z4 P62760 Q9UQ88 P30047 P49590
	EP11 EP8	23	P62256 Q15005 O60841 A0AVT1 Q9UI09 Q5EBL8 O14617 Q9UNH7 Q07157 P15586 O60739 Q9Y678 Q13492 Q12792 Q9BY32 P23921 P20591 P49821 P84085 P49903 Q9GZS3 Q9P2J5 P50570
	EP12 EP8	7	Q9BT78 Q08623 Q9UIJ7 O14579 P07686 Q9UK41 P61086
	EP11 EP9	9	Q8TBC4 P01615 P18621 Q02809 P13798 Q9NRW1 Q6YHK3 A0A0B4J2H0 P28062
	EP12 EP9	10	Q15782 P04440 Q96PD5 P01764 P00739 P01920 P15144 P20160 Q15043 P02750
	EP10 EP11	13	P60880 P00533 P11310 P02686 P82970 O43752 Q13423 Q86YR5 Q6P587 Q92733 P55265 Q96K17 Q14739
	EP10 EP12	2	P13284 Q5T8D3
	EP11 EP12	8	P01594 Q9UM07 O76003 P19320 Q15746 Q674X7 O43747 O15162
	EP1	22	O14981 Q01831 P21108 Q96QV6 Q8NFU3 O94901 Q92629 A6NIH7 Q8WYP5 Q9UI15 Q86WC4 Q32MK0 P21695 Q5JTJ3 O00506 Q96FV0 Q68E01 P13929 Q9BS40 Q14714 P61254 Q8N1V2
	EP2	16	P48507 Q9H1C3 Q8N257 Q9GZV4 Q14141 P27544 P49792 Q9NRR3 P48668 P30485 A6NIZ1 P62891 P04733 A6NEC2 P63267 Q5T749
	EP3	9	P30483 Q8N9C0 O60437 Q04828 P15559 Q15404 Q99962 P50225 Q9Y4G6
	EP4	71	O43813 Q9HBT6 O75608 Q9NYB9 Q14696 P06454 Q6DKJ4 Q9UM19 Q7Z6K5 Q8TEU8 Q14558 A6NGU5 Q9UPY6 Q9UBX1 Q9BRJ6 Q8N3F0 Q9NZ56 Q12849 Q8IYK4 P78537 Q9Y4Y9 Q9HCJ6 Q969X5 P12694 O00115 Q9H2H8 Q9C0B1 P05060 Q13636 Q15843 O75884 P21912 P15927 Q9UKF7 Q99719 Q9NZI8 O95819 Q96EQ0 P34896 O95571 Q9NZN3 Q99943 Q9Y3Q8 Q9UPQ0 Q96RF0 P61758 O95825 Q92530 O43236 P14649 Q96DE0 Q96C23 Q8N9N7 Q9UJC5 P41222 O75828 Q96GK7 …
	EP5	31	Q08431 P07360 Q9H4B7 P07585 P05160 P12259 P10124 O15258 Q05707 Q96IY4 P15924 P56199 P07359 Q13201 Q86YZ3 P36980 P51888 P0DOX7 P02538 P35858 Q03591 O95810 P07357 P36955 P01877 P05141 Q14520 O95831 Q02413 P26640 P36873
	EP6	3	P57087 Q8IYR6 Q9Y6R1
	EP7	730	P27958 Q9H7P6 Q8WYA6 Q5IS74 P0DOX5 P20929 O60306 P13901 O95159 Q9H930 Q8TDN6 Q03938 Q9H869 A0A075B6S2 Q5SR53 Q05496 O75306 P50768 Q9H7N4 H7BZ55 Q7Z4S6 Q9P2E7 Q0HD53 Q16720 P28277 Q9Y6M7 O60237 Q5VTH9 Q8TDB8 Q6I7B9 Q9UBF2 P16729 O60299 Q6X2U3 Q5T1R4 Q8IYF1 Q7Z3J3 O00483 Q8JPX5 P41226 Q92771 Q9UBP5 Q13586 Q5JZY3 Q96MT8 O43414 Q6ZW49 P21040 P31749 Q9ULE3 P49796 Q96G23 Q14517 P20531 Q4V328 O75116 Q8T…
	EP8	190	O60443 Q13325 P50453 P51808 Q9H1K1 Q9UGV2 P31323 Q07617 Q10570 P40222 Q8IYD1 Q9Y285 Q92879 Q04323 Q8NI27 O43395 Q71DI3 P09913 Q8IUF8 O14879 Q96DB5 O75506 Q86VS8 P30519 P13521 Q7Z3D6 Q9Y5K6 P28370 Q13153 Q9NVS9 Q08752 Q7Z4H8 O60637 Q9NZW5 Q8TBC5 Q8TB36 P22415 P50135 O95295 Q8IXH7 Q9NR28 Q9H9H4 O43148 Q86XP3 Q9NX24 Q6STE5 P0DJW5 O43615 Q86TX2 Q9Y646 Q8WUW1 Q5VW32 P15170 P84022 Q9ULX6 P14317 O00505 …
	EP9	24	Q9Y5Y2 P13762 Q04695 Q92859 P02008 Q5D862 P05543 P36021 P01782 Q96KK5 Q68DU8 P30419 P07738 P06312 Q9Y262 P01703 Q96A33 P46060 P22792 Q13867 Q76MJ5 P06331 A0A0B4J1V1 P13760
	EP10	80	P51513 O94776 Q08174 P49585 Q8WVZ9 Q96FN4 Q00535 P29373 O75569 P08559 O75379 P32322 O15231 Q96JM3 Q8NI99 Q8WXI9 Q99496 P47736 P07948 O14562 P63215 Q587I9 Q13232 P43304 Q5SW79 Q5VTL8 P16444 Q96K83 Q14576 Q7Z460 Q9GZT3 P05452 A6NDB9 Q9BRK5 Q96PQ0 Q8TC12 Q12769 Q96IZ7 O14828 Q8NF37 P78504 Q8IWX8 O95249 Q9ULR0 Q15126 Q9ULU4 Q9BRJ7 O00154 O00757 Q5T8P6 P35249 P54760 P23511 Q05639 Q8TEM1 Q9Y666 Q9UKA9 …
	EP11	54	O14548 A0A0C4DH31 P10253 Q13564 Q9UJW0 Q9NZJ7 O75934 P48059 Q96SB3 P28799 Q6ZMP0 C8XPA8 P48739 P39748 O75015 Q641Q2 P51452 O00584 P01889 O43866 P78406 Q96LD4 Q92905 P34897 P63027 Q9BT09 P01768 Q15942 P04432 P04275 Q16666 Q14203 O60941 P47813 Q9NPY3 P05114 P61964 O95864 O14639 P55011 P10619 O75380 Q9C0C2 Q7L7X3 Q9HAV0 Q9HCN8 P21741 Q6UVK1 P24043 Q14699 P16989 P48431 O60499 Q9Y237
	EP12	29	P08185 P22894 P08648 Q6UX06 P59665 Q04826 O92531 P01699 P35754 O95498 P50552 A8MVU1 P25815 P04921 Q9HD89 Q6P4A8 Q8WWW8 Q03405 P05186 O75594 Q16678 P32942 Q6IBS0 P30512 P48960 Q92947 P52790 Q8IX19 O60234

## Sheet: C
		Venn diagram of the protein elemnts identified in grade II PF-Eps specimens
	Calculate and draw custom Venn diagrams
Input files:
List names	number of elements	number of unique elements
EP 2	564	564
EP 3	900	900
EP 5	849	849
EP1	903	903
Overall number of unique elements		1410
Image result:
Text results:
Names	total	elements
EP 2 EP 3 EP 5 EP1	323	P09651 Q15165 P30101 P13639 Q13449 P05388 Q14108 P45973 P50990 Q01082 Q13765 Q13813 Q16181 P22626 P78371 Q15365 P40926 P01023 P35241 O75947 P60033 P51148 P62258 P09874 Q99832 Q15424 Q5JTV8 P11279 P22234 Q06830 P02042 Q6IAA8 Q5SSJ5 Q07020 P29401 O94905 P84103 P62979 P30040 P05198 P05026 P51991 P08195 Q9Y3U8 P14866 P04004 Q00610 P12956 Q86UP2 O43175 P60174 P25705 O75367 P37802 O75369 P11021 P46821 …
EP 2 EP 5 EP1	25	Q14839 Q15334 P27816 P39023 Q12888 Q9P0M6 P62701 Q9H1E3 P08621 Q16698 O60506 Q6P2Q9 P38606 Q96GW7 Q8NBJ4 Q9Y2W1 P62424 Q14980 Q92804 Q96AQ6 P23246 Q13263 Q9Y624 Q9NVA2 Q9UD71
EP 3 EP 5 EP1	188	O95741 P80723 Q86VP6 P01019 P07741 P14868 P01008 P02751 P0C0S5 P04259 P01876 P02792 P00403 P09104 P00441 Q16543 P61247 P55084 P02748 P51149 Q7L576 P55036 P84243 P02765 O43852 Q92522 P00505 O60831 P05455 P04271 P63208 P43034 P69891 P68032 P13693 P35080 Q15121 P18206 P31949 Q04941 Q9BTT0 P02749 P08571 P04792 P60903 P61204 P25787 P63241 P22392 P26599 Q92688 O14773 P35237 P62081 P23396 Q86V81 Q13228 …
EP 2 EP 3 EP1	41	O43491 O15540 P07954 P50897 Q9H425 P29218 Q13526 Q99497 Q9Y3I0 Q96HY6 P51674 P23471 Q9NRX4 P61020 Q14444 P68400 Q92945 Q9UEY8 Q9Y383 P30626 Q96A26 P35268 Q9NZR1 Q9UBI6 P05091 P01116 O94811 P26232 Q01484 Q15691 Q14247 P09972 P48681 P62873 Q08170 P15259 Q13561 P62834 Q16799 P27361 P17302
EP 2 EP 3 EP 5	23	Q07954 P16144 P16615 O75891 Q9H4G4 P15531 P52209 Q8N6C5 O15075 P50454 Q12765 P22695 P23229 P13611 P00367 P12814 P01860 Q13151 O14594 P24821 Q13509 P29972 P11766
EP 5 EP1	39	O43657 Q15029 O95292 P31943 Q8NBS9 P12004 O75915 Q08945 P17480 P46783 Q16891 Q13418 P60866 P62829 Q8NFW8 Q02880 Q8TEA8 P26196 P09486 Q13409 Q9UNZ2 Q9Y5B9 O00161 Q8IYB3 P17844 P67809 P61353 P62318 Q9UMS4 O75643 P04439 P82979 P62249 Q15717 Q9P0V9 P20042 P62314 P07951 P26373
EP 2 EP1	45	Q9NYF8 Q01130 P50402 Q8N163 Q8NBX0 Q9UQE7 Q96B54 Q2TAY7 Q14683 Q9UQ35 Q8IX01 P15328 Q9P2K5 Q14165 Q9H307 P62491 Q9UQ80 P55795 P40855 P23527 Q9UKV3 Q15459 O00461 Q13523 Q5IJ48 Q52LJ0 P63167 Q15287 Q07666 Q9BUJ2 P51858 Q14938 Q6UN15 P0C0L4 Q96PK6 P98172 O94819 P10412 P04908 Q9H3Q1 Q13247 Q8NC56 P62913 P58876 Q5JRA6
EP 3 EP1	63	Q9H3N1 O76041 Q9H008 P11217 P80404 Q92598 P60981 P38117 P41208 P20339 P31153 P56134 P36543 P20674 P13804 P17655 P62995 Q14240 Q00688 P08237 Q9UK22 P23381 P10155 P28838 P20073 P04350 Q99627 P49721 P14927 Q13283 P28066 P19367 Q9UHX1 P55010 O43598 P62333 Q765P7 P08294 O95202 Q9UL46 Q9UNF0 P22307 P09622 P30049 O94856 P24752 Q9BRA2 P62304 P20618 P43487 P17987 P25788 P01112 P83916 Q14008 P62888 O75781 …
EP 2 EP 5	12	P68431 Q9UBS4 Q13885 Q8NC51 Q00325 Q9Y3Z3 P22087 P02786 P61313 P35555 P46776 Q02543
EP 3 EP 5	100	P05155 Q14315 P16157 O75390 P36222 Q01518 Q01995 O60749 P30493 P55268 O15511 P04217 P43686 P02549 P46108 Q15363 P26022 P13473 P02760 P07996 P02774 P55145 P50895 P08246 O75131 P68036 P62753 P62847 P05164 P21266 P43307 P07711 P09960 P43121 Q15063 Q13200 Q07960 O14602 P10451 P11047 Q14624 P46781 P01031 Q86VB7 P19823 Q9NTK5 P26885 P04179 P51178 P02766 P02511 P18085 P61769 Q6NZI2 Q9H299 O75368 P49913 …
EP 2 EP 3	24	P02656 P35052 Q14194 Q5KU26 O14672 Q8NFZ8 Q96FZ7 Q9P121 Q6UXB8 P14209 P02795 P30038 Q16620 P07451 P08754 Q16527 Q92823 Q02252 P45974 P50995 Q8IWA5 P69892 O43765 Q9NYL9
EP1	179	Q8WVF1 P22570 O43865 Q9NS86 P61457 O94874 P49750 Q8WWI5 P30084 O75533 P30273 Q8N392 Q96BJ3 O14981 P61201 Q12931 Q9Y2W2 Q9NZ45 Q9UHA4 O96019 Q96BM9 P18859 Q9H3Z4 Q14157 O43290 Q8N111 Q01831 Q8NE71 Q16531 P38159 P21108 Q9HB40 P62310 Q04837 Q49A26 P84090 P61764 Q16630 P30042 Q5JTJ3 Q13435 Q8NHG7 Q13243 Q96QV6 O60784 Q8WXX5 P28289 P42126 Q96C74 Q8NFU3 Q8NCW5 O43143 P20338 Q9UBK7 O00506 O75400 O00139 …
EP 5	139	P00736 A0A0A0MRZ8 P00748 P08123 P07093 Q9Y3E1 P02452 Q99460 P51888 P14780 P11215 P13674 P61626 Q14254 Q08431 P98160 P20851 P23142 O43854 Q9UBG0 P0DOX7 Q9BS26 P08514 P01700 Q02978 P10643 Q96AC1 P47985 P13796 Q99829 Q9NYU2 Q9P035 P02753 Q12907 P02746 Q9Y2X3 P41218 P07360 P09488 P01859 Q9ULV4 P07358 Q86UX7 P43652 P04839 P17213 Q96AY3 P21246 Q9H4B7 P31146 P20645 P27169 Q13724 P07585 P02538 P01591 P11…
EP 2	71	P49327 P48507 Q96HN2 O00151 Q8N7J2 Q92499 P48668 P04156 P30485 A6NIZ1 Q7Z7K6 Q66PJ3 Q8IZP0 Q9GZT4 Q9UQB3 Q9P258 P01034 P62891 Q13177 Q12874 O95218 Q9H4F8 P63220 P04733 Q96KR1 O75487 Q14847 P80297 Q13641 O00451 P53621 O75056 O15355 P39656 O00168 Q9H1C3 Q92752 P22748 Q8N257 Q06481 Q9BUF5 Q9GZV4 A6NEC2 Q14141 Q8N2G4 P11137 Q14151 O15031 Q9NQ34 Q8N4V1 P63267 P55081 Q96PU8 P20020 P27544 Q5T749 P15104 …
EP 3	138	Q15631 P02724 P06899 P30483 Q07812 O60716 P51571 P17174 O76054 P22676 Q8N568 Q8IVF2 Q14764 O75381 P60891 P06756 P55735 Q16658 P63010 P21589 P28074 Q9Y2J8 O75874 P36871 Q9Y2S2 Q99961 Q8TCD5 Q15181 O43633 Q9Y3A6 P42330 Q8WUM4 Q14914 P42785 Q96FW1 Q9BRX8 P52758 P28065 P23588 P62841 P60983 P49588 P16104 Q99613 P11171 P36959 Q9UJ70 Q15369 P78310 P30085 O94919 Q9Y4F1 O94772 P14174 P54725 Q96TA1 P62993 …

## Sheet: D
Venn diagram of the protein elements identified in grade III PF-Eps specimens
	Calculate and draw custom Venn diagrams
Input files:
List names	number of elements	number of unique elements
EP11	1425	1425
EP12	1121	1121
EP6	853	853
EP7	2007	2007
EP8	1658	1658
EP9	1279	1279
Overall number of unique elements		2926
Image result:
We're sorry, you provided too many different lists to be captured in a single drawing.
Text results:
Names	total	elements
EP11 EP12 EP6 EP7 EP8 EP9	570	P09651 P80723 Q86VP6 P01019 P05388 P07741 P50990 P14868 P0C0S5 Q16181 P35241 O75947 P00441 P51148 Q9UNM6 P09874 Q99832 P61247 P51149 Q01995 Q5SSJ5 Q07020 P55036 O94905 P02765 Q5KU26 O43852 P05198 P05026 P05455 P04271 P51991 P08195 Q9Y3U8 P63208 P63010 P04004 Q00610 P12956 O43175 P60174 O75367 P37802 P11021 Q96AC1 P60981 P16401 P10809 Q04837 P18206 P41208 P08133 P55072 P20339 Q14974 P04792 P55795 …
EP11 EP6 EP7 EP8 EP9	50	Q5JTV8 Q99460 P84243 O95292 Q92499 Q16531 O43143 P62701 Q08945 P08237 Q9UKV3 Q6P2Q9 P09543 P63167 P12111 Q9UMS4 P09622 P78527 P41091 Q92747 Q07954 Q15424 Q15334 P27816 Q9P2K5 Q16630 Q8NCW5 Q9P0M6 P08621 P62995 Q7Z4V5 Q9H8H3 P38919 Q53GQ0 Q05519 O14980 Q14980 P37108 Q14344 Q8IYB3 P49411 P17844 P78347 O75643 Q13148 P62745 Q13151 P31942 Q9NZ08 P04908
EP12 EP6 EP7 EP8 EP9	13	O14602 O00231 P20340 P36957 P16671 P61020 P62820 P02654 Q9BUT1 P62304 P25788 Q14019 P55769
EP11 EP12 EP6 EP7 EP8	14	O43657 P51571 O75390 P28161 Q02252 P50213 Q16777 P83916 P55084 Q96AE4 P63172 O95202 Q9UNF0 P31937
EP11 EP12 EP6 EP7 EP9	31	P16144 P02748 P06756 O75874 P13647 P61026 P19823 Q16620 Q92823 P23229 P13611 P17931 P04003 P61313 O14907 P02751 O75891 P23142 Q13885 P01871 P36959 Q9UK22 P20073 P19367 P10915 O14594 P07305 P24821 P19827 Q8N0U8 Q15582
EP11 EP12 EP6 EP8 EP9	44	Q13449 O00764 O14672 P04217 Q9P121 P02774 P49588 Q9NRX4 Q00688 P68400 P01857 Q16643 O43242 P46976 P53004 P46778 Q15075 P61353 Q9Y696 Q8WZA0 O75436 Q13011 P00491 O15347 P06899 P28070 P29218 P52758 P68104 O14818 P35221 Q99627 P53999 Q9ULC3 Q9NQX7 Q15691 P16403 O60814 Q96PU8 P01112 O15484 P50148 P63092 P27635
EP11 EP12 EP7 EP8 EP9	115	Q14315 Q07812 O43583 P01876 P00403 P11413 P55268 P43686 P36871 Q99961 Q15363 P13796 P31949 Q9UQ80 P00918 P61077 P55145 Q9Y4L1 P31146 P46783 P23381 P30533 P38606 P13716 Q14624 Q9NX63 P62854 Q9Y2W1 Q92599 P02794 Q6NZI2 P62277 P07858 P21281 Q9UBQ0 O43169 O75955 Q9NUQ9 P24752 Q9Y3B3 P02671 P62195 P51884 P48681 Q9P0V9 Q9NQ48 P21399 P01903 Q9Y5S9 P35579 P02788 Q9NYL9 O95782 P62906 P36269 P40261 O60831 …
EP6 EP7 EP8 EP9	4	Q8WWI5 Q9Y224 P08754 P04350
EP11 EP6 EP7 EP8	6	P26196 P36969 Q16658 Q7Z6Z7 Q6P4E1 Q14498
EP12 EP6 EP7 EP8	7	P38117 Q9BRA2 P42126 P00966 Q9NX40 Q8N2G4 P27361
EP11 EP6 EP7 EP9	6	P14415 O15540 P39023 Q13491 P46776 P61225
EP12 EP6 EP7 EP9	3	P01111 P02533 Q96CW1
EP11 EP12 EP6 EP7	1	P69891
EP11 EP6 EP8 EP9	12	Q9Y2S2 O75347 P98172 Q9NVA2 P28072 Q96B54 P31943 Q9UBB4 P12004 Q9Y4F1 Q15286 P23434
EP12 EP6 EP8 EP9	6	O43865 P68431 Q13765 Q9Y3E7 Q9UH03 Q9Y5Z4
EP11 EP12 EP6 EP8	1	P51649
EP11 EP12 EP6 EP9	6	O95741 Q92522 Q13509 Q9Y6R7 Q14194 P51531
EP11 EP7 EP8 EP9	64	P35052 Q9NYF8 Q15029 O75533 Q9NTI5 Q969H8 Q9ULC4 O96019 Q9UQ35 P38159 O75369 Q92598 Q12888 P23588 P40763 Q02880 O95433 P11387 Q969G3 Q07666 Q00325 Q9BUJ2 O14744 Q9BUF5 Q53GS9 Q9NQG5 P11137 Q14554 P35998 P09012 Q14247 P21810 P78324 P31689 O00567 Q96I24 P42224 P16615 Q14839 Q14165 Q9H307 Q9H425 Q13435 Q13404 P55060 Q9Y2X3 Q8NBS9 P51608 Q99873 P0DP23 Q8NFW8 O14880 P37840 P78559 P61960 Q13162 P68402 …
EP12 EP7 EP8 EP9	12	P07711 O15145 P53990 Q9Y4E1 Q92973 O43324 P15328 P13473 P14174 Q9BPX5 P59998 P41250
EP11 EP12 EP7 EP8	26	Q15427 Q9BX66 P28065 P27701 P30038 Q6UW68 Q9Y2B0 Q9NS69 Q765P7 P54136 P54819 P24666 Q9H3G5 P09493 P30084 P84095 Q7KZF4 P80404 O43809 P14209 O00534 O00451 Q96C19 P11177 P25445 P48444
EP11 EP12 EP7 EP9	29	Q8IVF2 P98160 P02760 P41218 P05164 P50914 P11047 P19971 P01031 Q02952 Q01813 Q96AQ6 P01860 Q99623 O94973 P14543 Q14764 P11215 P26022 P08246 P00747 P08572 P61769 P49913 O00560 P02730 P01619 P20036 Q00169
EP11 EP12 EP8 EP9	34	Q15631 O43399 O14773 Q14152 Q8TAQ2 P54725 Q9NR45 Q13409 P61601 Q9NZZ3 Q96G03 Q9UHY7 Q05682 Q96QR8 Q9UBS4 Q13126 P07954 Q9UL25 Q9H4G4 Q9Y3F4 P30042 P36543 P60866 P17050 P49773 P55957 Q14112 Q9BZZ5 P67809 P32969 P11940 Q16799 O94903 Q15435
EP6 EP7 EP8	11	Q14240 P37235 Q13242 Q13247 P00390 P61457 P62310 P14927 Q13641 Q9UHD9 P23470
EP6 EP7 EP9	4	P46439 P81605 P53801 P17302
EP11 EP6 EP7	4	Q9BRX8 Q96DH6 O75695 O00461
EP12 EP6 EP7	3	Q9Y2J8 P62714 Q99613
EP6 EP8 EP9	7	P28074 P54289 O75487 O75056 Q15049 O94856 P61201
EP11 EP6 EP8	5	Q9UQB3 Q5T1J5 Q14160 P09417 Q09028
EP12 EP6 EP8	2	Q9NZR1 P15259
EP11 EP6 EP9	4	P98095 P23634 Q8NFZ8 P25325
EP12 EP6 EP9	3	P11908 Q96CN7 Q15819
EP7 EP8 EP9	17	P55735 O94906 Q7L775 Q16401 Q16576 P35612 P54105 Q9UQE7 P17480 Q9BUR5 Q13595 Q9BUH6 Q9HCC8 P36542 Q92542 Q96PK6 P08779
EP11 EP7 EP8	40	O76041 P08123 P02452 P00505 O94979 Q14157 P84090 Q5JSH3 P53621 P28331 Q9Y3Z3 Q9Y6B6 Q9BVG4 Q13576 O00571 Q8IX12 Q86U42 P50402 O60716 Q9BXP5 O14561 P60891 Q96ST2 Q9H1E5 Q9P035 O75400 P18583 P53618 P62750 Q9Y5B9 Q02818 Q99459 Q9BXK5 Q14008 P62266 O00217 P51648 O60216 Q92900 Q93009
EP12 EP7 EP8	14	Q9H008 P02753 Q99614 Q9ULZ3 P51659 Q9UHV9 Q6YN16 O96000 Q9Y376 Q92882 P13761 P00492 P50995 O60613
EP11 EP7 EP9	15	Q14254 Q9NYU2 Q96AY3 P11277 P05204 Q03135 P05067 Q9H3N1 P16157 Q9NZ45 P30453 Q12797 Q14847 P11166 Q9NPH2
EP12 EP7 EP9	12	Q04941 Q10588 Q96HE7 P02743 P0DJI8 P08697 P35542 Q06033 P27169 P10644 P08575 P05546
EP11 EP12 EP7	5	Q8NBX0 O00303 P24844 P07996 P02776
EP11 EP8 EP9	45	Q9UBE0 O60763 Q9UMX0 Q9H3Z4 Q9UN86 O43504 O00232 P50895 P22102 Q9Y2A7 O75937 Q8WXF1 Q8TEA8 P13861 P61923 Q14938 Q9UDT6 Q96ME7 Q00059 O60828 P20042 P49006 P04062 Q16881 P16930 Q9UNS2 Q12904 O43290 Q49A26 Q96CT7 Q12874 P63220 Q14978 O15355 P26639 P49321 Q9GZP4 Q6UN15 P55081 P62316 P67775 O43237 O95373 P20810 Q99436
EP12 EP8 EP9	7	P62841 Q2TAA2 P55058 P61970 P07451 P63173 P78417
EP11 EP12 EP8	16	Q9HAT2 Q8WUM4 O75832 P40121 P52306 Q9H4M9 Q04637 P20290 P33176 O43181 Q9NY33 O00429 Q8NC51 Q16270 P02511 Q13596
EP11 EP12 EP9	32	A0A0A0MRZ8 P49327 P17174 P49591 Q9NR31 P01700 Q9UGT4 P10451 P01624 Q8N8S7 P08574 P30740 P04114 P62917 Q9BPU6 P09871 P00736 Q14515 P36222 P14780 P61626 P23083 Q01628 A0A0C4DH38 P80188 P06737 P02462 P42025 P01033 Q9BWD1 P05106 P13671
EP6 EP7	8	Q9H361 P11217 P63096 P35244 P42330 P08134 P48509 P16188
EP6 EP8	6	P15374 Q9UBP4 Q9BR76 P15121 P62910 P28907
EP6 EP9	7	Q6UXS0 Q6UVY6 P29762 P14324 P17301 P78310 Q96FC7
EP11 EP6	2	P13726 P60201
EP12 EP6	2	Q96FQ6 Q96E39
EP7 EP8	92	Q9BSJ8 Q8WVF1 P18463 Q9BUQ8 P53041 P14207 Q92878 Q9HB40 Q7L014 Q13243 P30876 Q8N5K1 P80303 Q9UBX5 P49756 Q13523 Q8NBJ7 Q15287 Q15436 Q9UBW8 Q7Z406 P50440 P32455 O00233 Q01484 Q15124 P62330 P11532 Q8WVY7 Q9UJ90 Q13057 Q15506 P17568 Q92692 Q8NHP8 Q7Z3B1 Q8WWQ0 Q9UMX5 Q9UIL1 A1L0T0 P62495 O94874 O14974 Q8IXT5 Q9NT62 Q2TAY7 P63151 Q8IX01 A6NHR9 P49959 O60784 Q53EL6 P28289 Q15020 O00139 Q5BKZ1 O60762 …
EP7 EP9	18	P02656 P12273 P02549 P04156 P84098 P69892 O95197 Q9BWS9 P30273 P02746 P60468 P14406 Q15067 P22352 P06681 P02747 P13164 Q6Y288
EP11 EP7	23	P21980 P29992 P01911 Q14914 P30508 Q15599 Q9Y6W5 Q9UBR2 O15533 E9PAV3 Q9NRQ2 O43617 P48147 P53007 O95881 P10321 Q99426 O75396 P07099 Q8IWI9 Q10567 Q96M27 O14531
EP12 EP7	10	P04839 P33121 Q08722 Q86UX7 P30479 Q9BV40 P26447 P20292 Q5XKP0 Q70UQ0
EP8 EP9	26	P48637 Q96AB3 O00499 P15289 Q15102 Q9NXG2 O60493 O15126 Q9NP79 Q13618 P25786 P42766 O43684 Q7L5N1 Q14683 Q9NT99 Q13098 P35414 Q9UBT2 Q9H488 Q9P2T1 P55884 Q9UHQ4 P46063 P62899 Q13740
EP11 EP8	78	P49750 Q9Y3E1 P42765 O75381 Q9Y2W2 Q4G0N4 Q8NE71 P51610 P62256 O43493 P62136 Q96F85 P16949 Q7RTV0 Q9H1E3 Q13442 Q02790 Q15005 O60841 O75940 Q96KR1 A0AVT1 Q9UI09 Q14353 Q5EBL8 Q96DI7 Q9NRR5 Q92769 O75822 Q9Y6X4 Q9NYB0 O43347 P62633 Q15637 Q9NVD7 O14617 P40424 P07814 Q9UNH7 P82979 O76094 Q07157 P49915 O00629 P15586 P62314 O60739 Q9Y678 Q01085 Q13492 Q92575 Q9UHA4 P18859 Q7L266 Q12792 Q9NSD9 Q9P258 …
EP12 EP8	20	Q12931 Q06124 Q8TCD5 Q8N684 Q9C0E8 P98179 Q9Y5X3 P49354 Q9BY43 Q9BT78 O43633 P09132 Q08623 Q9UIJ7 O14579 Q7L1Q6 P07686 Q9UK41 Q15006 P61086
EP11 EP9	26	Q8TBC4 P13674 P27694 P21589 Q12907 Q13177 Q13363 Q16527 Q9NY47 Q9BTV4 Q9HB71 O15031 P01615 P18621 Q02809 P13798 Q9NRW1 Q6YHK3 Q9NVJ2 P02786 A0A0B4J2H0 P28062 P17677 P10636 P62280 P07108
EP12 EP9	19	Q15782 P10643 Q96FZ7 P04440 Q9ULA0 P12081 Q15274 Q96PD5 P01764 P00739 P20039 P01920 P15144 P20160 O60888 P12429 P0C0L4 Q15043 P02750
EP11 EP12	19	P01594 Q9UM07 Q99829 P17213 Q96TA1 Q9Y371 O76003 P18085 P16284 P19320 Q9NR46 O00151 Q15746 P62263 Q674X7 O43747 P24158 P09110 O15162
EP6	11	P57087 Q13557 Q92752 Q8N111 Q9P2R7 P01034 P0DN79 Q8N3E9 Q8IYR6 Q9Y6R1 Q9NUB1
EP7	780	P27958 Q9H7P6 Q8WYA6 Q5IS74 P0DOX5 P22570 P20929 O60306 P13901 O95159 Q9H930 Q8TDN6 Q03938 Q9H869 A0A075B6S2 Q5SR53 Q05496 O75306 P50768 Q9H7N4 P31040 H7BZ55 Q7Z4S6 Q9P2E7 Q0HD53 Q16720 Q8N392 P28277 Q9Y6M7 O60237 Q5VTH9 Q96HN2 Q8TDB8 Q6I7B9 Q9UBF2 P16729 O60299 Q6X2U3 Q5T1R4 Q8IYF1 Q7Z3J3 O00483 Q8JPX5 P41226 Q92771 Q9UBP5 Q13586 Q5JZY3 Q96MT8 O43414 Q6ZW49 P21040 P20851 P31749 Q9ULE3 P49796 Q96…
EP8	294	P55809 O60443 Q13325 P50453 P51808 Q8N568 P42704 P30493 P51532 Q9H1K1 Q8WVJ2 Q9UGV2 P31323 Q07617 Q10570 Q9NX05 P40222 Q8IYD1 Q9Y285 P61764 Q66PJ3 Q92879 Q04323 Q8NI27 O43395 Q71DI3 P09913 Q96C74 Q8IUF8 O14879 Q96DB5 P20674 O75506 Q9UBK7 Q86VS8 Q16625 P30519 Q13428 P13521 Q7Z3D6 Q9Y5K6 O94919 P24928 Q9NUJ1 P28370 Q13153 Q9NVS9 Q08752 Q7Z4H8 O60637 Q9NZW5 Q8TBC5 Q13330 P41223 Q16762 P50150 Q8TB36 …
EP9	38	P02724 Q9Y5Y2 O76054 P13762 P07358 Q04695 Q92859 P02008 Q5D862 P30491 P05543 P16452 P36021 P01782 P53396 P04229 Q96KK5 Q68DU8 P30419 P07738 P06312 Q9Y262 Q99598 P01703 P20338 P43652 Q9H4F8 Q96A33 P46060 P01591 P11169 P22792 P01861 Q13867 Q76MJ5 P06331 A0A0B4J1V1 P13760
EP11	102	O14548 A0A0C4DH31 Q96BJ3 P60880 P10253 Q13424 Q13564 P00533 Q9UJW0 Q9NZJ7 O75934 Q9ULV4 P48059 Q96SB3 P21246 P28799 P11310 Q13724 P54577 Q6ZMP0 P02686 C8XPA8 P82970 P48739 P02795 P39748 O75015 O43752 Q9H479 Q13423 Q16363 Q641Q2 P51452 O00584 P01889 O43866 Q9H9B4 Q86YR5 Q9NP97 P78406 Q96LD4 Q92905 P34897 Q96FJ2 P63027 P07951 Q9BT09 P01768 Q15942 P04432 P04275 Q16666 Q6P587 P00748 Q14203 O60941 Q92…
EP12	45	P08185 P22894 P08648 Q6UX06 P59665 Q04826 O92531 P30405 P01699 Q9Y5K8 P35754 P31997 O95498 P50552 A8MVU1 P25815 P18428 P24593 P04921 Q9HD89 P13284 Q6P4A8 Q8WWW8 Q03405 Q9BQE5 P05186 P62942 Q9UBQ5 O75594 Q16678 P32942 P11171 Q6IBS0 P30512 P48960 Q92947 P52790 P07225 Q5T8D3 Q8IX19 P25311 O60234 P41567 P00742 P26373

## Sheet: E
grade II PF-EP 28+295 proteins									grade III PF-EP 275+295 proteins
pathways classification									pathways classification
1	Axon guidance mediated by netrin (P00009)	2	0.006	0.007					1	Axon guidance mediated by netrin (P00009)	2	0.004	0.004
2	Axon guidance mediated by Slit/Robo (P00008)	2	0.006	0.007					2	Axon guidance mediated by Slit/Robo (P00008)	2	0.004	0.004
3	Axon guidance mediated by semaphorins (P00007)	4	0.013	0.015					3	Axon guidance mediated by semaphorins (P00007)	4	0.007	0.009
4	Apoptosis signaling pathway (P00006)	6	0.019	0.022					4	Apoptosis signaling pathway (P00006)	7	0.012	0.015
5	Gonadotropin-releasing hormone receptor pathway (P06664)	12	0.038	0.044					5	Pyridoxal-5-phosphate biosynthesis (P02759)	1	0.002	0.002
6	Pyridoxal-5-phosphate biosynthesis (P02759)	1	0.003	0.004					6	Gonadotropin-releasing hormone receptor pathway (P06664)	16	0.028	0.034
7	Angiogenesis (P00005)	3	0.009	0.011					7	Angiogenesis (P00005)	8	0.014	0.017
8	Alzheimer disease-presenilin pathway (P00004)	4	0.013	0.015					8	Alzheimer disease-presenilin pathway (P00004)	5	0.009	0.011
9	Alzheimer disease-amyloid secretase pathway (P00003)	1	0.003	0.004					9	Alzheimer disease-amyloid secretase pathway (P00003)	1	0.002	0.002
10	Alpha adrenergic receptor signaling pathway (P00002)	1	0.003	0.004					10	Alpha adrenergic receptor signaling pathway (P00002)	2	0.004	0.004
11	Adrenaline and noradrenaline biosynthesis (P00001)	4	0.013	0.015					11	Adrenaline and noradrenaline biosynthesis (P00001)	7	0.012	0.015
12	CCKR signaling map (P06959)	8	0.025	0.029					12	CCKR signaling map (P06959)	13	0.023	0.028
13	Ubiquitin proteasome pathway (P00060)	2	0.006	0.007					13	Ubiquitin proteasome pathway (P00060)	5	0.009	0.011
14	p53 pathway (P00059)	1	0.003	0.004					14	p53 pathway (P00059)	1	0.002	0.002
15	Wnt signaling pathway (P00057)	5	0.016	0.018					15	Wnt signaling pathway (P00057)	7	0.012	0.015
16	VEGF signaling pathway (P00056)	2	0.006	0.007					16	VEGF signaling pathway (P00056)	4	0.007	0.009
17	Fructose galactose metabolism (P02744)	1	0.003	0.004					17	Glutamine glutamate conversion (P02745)	1	0.002	0.002
18	Toll receptor signaling pathway (P00054)	1	0.003	0.004					18	Fructose galactose metabolism (P02744)	2	0.004	0.004
19	T cell activation (P00053)	3	0.009	0.011					19	Toll receptor signaling pathway (P00054)	2	0.004	0.004
20	TGF-beta signaling pathway (P00052)	1	0.003	0.004					20	T cell activation (P00053)	4	0.007	0.009
21	TCA cycle (P00051)	2	0.006	0.007					21	TGF-beta signaling pathway (P00052)	2	0.004	0.004
22	Parkinson disease (P00049)	15	0.047	0.055					22	TCA cycle (P00051)	2	0.004	0.004
23	De novo purine biosynthesis (P02738)	1	0.003	0.004					23	De novo pyrimidine ribonucleotides biosythesis (P02740)	2	0.004	0.004
24	PI3 kinase pathway (P00048)	3	0.009	0.011					24	Plasminogen activating cascade (P00050)	2	0.004	0.004
25	PDGF signaling pathway (P00047)	1	0.003	0.004					25	De novo pyrimidine deoxyribonucleotide biosynthesis (P02739)	2	0.004	0.004
26	Nicotinic acetylcholine receptor signaling pathway (P00044)	4	0.013	0.015					26	Parkinson disease (P00049)	24	0.042	0.051
27	Muscarinic acetylcholine receptor 2 and 4 signaling pathway (P00043)	5	0.016	0.018					27	De novo purine biosynthesis (P02738)	4	0.007	0.009
28	Muscarinic acetylcholine receptor 1 and 3 signaling pathway (P00042)	2	0.006	0.007					28	PI3 kinase pathway (P00048)	5	0.009	0.011
29	Metabotropic glutamate receptor group II pathway (P00040)	4	0.013	0.015					29	PDGF signaling pathway (P00047)	4	0.007	0.009
30	GABA-B receptor II signaling (P05731)	2	0.006	0.007					30	Oxidative stress response (P00046)	2	0.004	0.004
31	Endogenous cannabinoid signaling (P05730)	2	0.006	0.007					31	Nicotinic acetylcholine receptor signaling pathway (P00044)	6	0.011	0.013
32	Metabotropic glutamate receptor group III pathway (P00039)	4	0.013	0.015					32	Muscarinic acetylcholine receptor 2 and 4 signaling pathway (P00043)	8	0.014	0.017
33	Ionotropic glutamate receptor pathway (P00037)	2	0.006	0.007					33	Muscarinic acetylcholine receptor 1 and 3 signaling pathway (P00042)	5	0.009	0.011
34	Interleukin signaling pathway (P00036)	1	0.003	0.004					34	Metabotropic glutamate receptor group II pathway (P00040)	7	0.012	0.015
35	Interferon-gamma signaling pathway (P00035)	1	0.003	0.004					35	GABA-B receptor II signaling (P05731)	3	0.005	0.006
36	Integrin signalling pathway (P00034)	12	0.038	0.044					36	Endogenous cannabinoid signaling (P05730)	3	0.005	0.006
37	Vitamin B6 metabolism (P02787)	1	0.003	0.004					37	Metabotropic glutamate receptor group III pathway (P00039)	6	0.011	0.013
38	ATP synthesis (P02721)	2	0.006	0.007					38	Ionotropic glutamate receptor pathway (P00037)	3	0.005	0.006
39	Insulin/IGF pathway-mitogen activated protein kinase kinase/MAP kinase cascade (P00032)	1	0.003	0.004					39	Interleukin signaling pathway (P00036)	2	0.004	0.004
40	p53 pathway feedback loops 2 (P04398)	1	0.003	0.004					40	Interferon-gamma signaling pathway (P00035)	1	0.002	0.002
41	Inflammation mediated by chemokine and cytokine signaling pathway (P00031)	10	0.031	0.037					41	Adenine and hypoxanthine salvage pathway (P02723)	1	0.002	0.002
42	Thyrotropin-releasing hormone receptor signaling pathway (P04394)	2	0.006	0.007					42	Integrin signalling pathway (P00034)	19	0.034	0.041
43	Ras Pathway (P04393)	5	0.016	0.018					43	Vitamin B6 metabolism (P02787)	1	0.002	0.002
44	Oxytocin receptor mediated signaling pathway (P04391)	2	0.006	0.007					44	ATP synthesis (P02721)	2	0.004	0.004
45	Huntington disease (P00029)	9	0.028	0.033					45	Insulin/IGF pathway-mitogen activated protein kinase kinase/MAP kinase cascade (P00032)	2	0.004	0.004
46	Heterotrimeric G-protein signaling pathway-rod outer segment phototransduction (P00028)	1	0.003	0.004					46	p53 pathway feedback loops 2 (P04398)	1	0.002	0.002
47	Heterotrimeric G-protein signaling pathway-Gq alpha and Go alpha mediated pathway (P00027)	4	0.013	0.015					47	Inflammation mediated by chemokine and cytokine signaling pathway (P00031)	15	0.027	0.032
48	p38 MAPK pathway (P05918)	2	0.006	0.007					48	Hypoxia response via HIF activation (P00030)	2	0.004	0.004
49	Heterotrimeric G-protein signaling pathway-Gi alpha and Gs alpha mediated pathway (P00026)	3	0.009	0.011					49	Thyrotropin-releasing hormone receptor signaling pathway (P04394)	6	0.011	0.013
50	Opioid proopiomelanocortin pathway (P05917)	4	0.013	0.015					50	Ras Pathway (P04393)	6	0.011	0.013
51	Opioid prodynorphin pathway (P05916)	4	0.013	0.015					51	Oxytocin receptor mediated signaling pathway (P04391)	6	0.011	0.013
52	Glycolysis (P00024)	9	0.028	0.033					52	Huntington disease (P00029)	16	0.028	0.034
53	Opioid proenkephalin pathway (P05915)	3	0.009	0.011					53	Heterotrimeric G-protein signaling pathway-rod outer segment phototransduction (P00028)	3	0.005	0.006
54	Serine glycine biosynthesis (P02776)	2	0.006	0.007					54	Heterotrimeric G-protein signaling pathway-Gq alpha and Go alpha mediated pathway (P00027)	8	0.014	0.017
55	Nicotine pharmacodynamics pathway (P06587)	1	0.003	0.004					55	p38 MAPK pathway (P05918)	3	0.005	0.006
56	Enkephalin release (P05913)	3	0.009	0.011					56	Heterotrimeric G-protein signaling pathway-Gi alpha and Gs alpha mediated pathway (P00026)	8	0.014	0.017
57	FGF signaling pathway (P00021)	9	0.028	0.033					57	Opioid proopiomelanocortin pathway (P05917)	7	0.012	0.015
58	Dopamine receptor mediated signaling pathway (P05912)	6	0.019	0.022					58	Opioid prodynorphin pathway (P05916)	7	0.012	0.015
59	FAS signaling pathway (P00020)	5	0.016	0.018					59	Glycolysis (P00024)	11	0.019	0.024
60	Angiotensin II-stimulated signaling through G proteins and beta-arrestin (P05911)	3	0.009	0.011					60	Opioid proenkephalin pathway (P05915)	6	0.011	0.013
61	Histamine H2 receptor mediated signaling pathway (P04386)	1	0.003	0.004					61	Serine glycine biosynthesis (P02776)	2	0.004	0.004
62	Pyruvate metabolism (P02772)	2	0.006	0.007					62	Nicotine pharmacodynamics pathway (P06587)	6	0.011	0.013
63	Histamine H1 receptor mediated signaling pathway (P04385)	1	0.003	0.004					63	Salvage pyrimidine ribonucleotides (P02775)	1	0.002	0.002
64	Pyrimidine Metabolism (P02771)	2	0.006	0.007					64	Enkephalin release (P05913)	5	0.009	0.011
65	Cortocotropin releasing factor receptor signaling pathway (P04380)	2	0.006	0.007					65	FGF signaling pathway (P00021)	11	0.019	0.024
66	Endothelin signaling pathway (P00019)	1	0.003	0.004					66	Dopamine receptor mediated signaling pathway (P05912)	13	0.023	0.028
67	EGF receptor signaling pathway (P00018)	8	0.025	0.029					67	FAS signaling pathway (P00020)	5	0.009	0.011
68	Cytoskeletal regulation by Rho GTPase (P00016)	8	0.025	0.029					68	S-adenosylmethionine biosynthesis (P02773)	1	0.002	0.002
69	Cadherin signaling pathway (P00012)	4	0.013	0.015					69	Angiotensin II-stimulated signaling through G proteins and beta-arrestin (P05911)	5	0.009	0.011
70	Beta3 adrenergic receptor signaling pathway (P04379)	2	0.006	0.007					70	Histamine H2 receptor mediated signaling pathway (P04386)	3	0.005	0.006
71	Blood coagulation (P00011)	3	0.009	0.011					71	Pyruvate metabolism (P02772)	2	0.004	0.004
72	Beta2 adrenergic receptor signaling pathway (P04378)	2	0.006	0.007					72	Histamine H1 receptor mediated signaling pathway (P04385)	4	0.007	0.009
73	B cell activation (P00010)	3	0.009	0.011					73	Pyrimidine Metabolism (P02771)	2	0.004	0.004
74	Beta1 adrenergic receptor signaling pathway (P04377)	2	0.006	0.007					74	Cortocotropin releasing factor receptor signaling pathway (P04380)	5	0.009	0.011
75	5HT4 type receptor mediated signaling pathway (P04376)	2	0.006	0.007					75	Endothelin signaling pathway (P00019)	1	0.002	0.002
76	Pentose phosphate pathway (P02762)	3	0.009	0.011					76	EGF receptor signaling pathway (P00018)	10	0.018	0.021
77	5HT3 type receptor mediated signaling pathway (P04375)	1	0.003	0.004					77	DNA replication (P00017)	1	0.002	0.002
78	5HT2 type receptor mediated signaling pathway (P04374)	2	0.006	0.007					78	Cytoskeletal regulation by Rho GTPase (P00016)	13	0.023	0.028
79	5HT1 type receptor mediated signaling pathway (P04373)	4	0.013	0.015					79	Cell cycle (P00013)	3	0.005	0.006
80	5-Hydroxytryptamine degredation (P04372)	3	0.009	0.011					80	Cadherin signaling pathway (P00012)	5	0.009	0.011
									81	Beta3 adrenergic receptor signaling pathway (P04379)	5	0.009	0.011
									82	Blood coagulation (P00011)	7	0.012	0.015
									83	Beta2 adrenergic receptor signaling pathway (P04378)	5	0.009	0.011
									84	B cell activation (P00010)	3	0.005	0.006
									85	Beta1 adrenergic receptor signaling pathway (P04377)	5	0.009	0.011
									86	5HT4 type receptor mediated signaling pathway (P04376)	5	0.009	0.011
									87	Pentose phosphate pathway (P02762)	4	0.007	0.009
									88	5HT3 type receptor mediated signaling pathway (P04375)	2	0.004	0.004
									89	5HT2 type receptor mediated signaling pathway (P04374)	6	0.011	0.013
									90	5HT1 type receptor mediated signaling pathway (P04373)	7	0.012	0.015
									91	5-Hydroxytryptamine degredation (P04372)	4	0.007	0.009
	grade II PF-EP 28+295 proteins														grade III PF-EP 28+295 proteins
	pathways overrepresentation														pathways overrepresentation
		Analysis Type:	PANTHER Overrepresentation Test (Released 20190711)												Analysis Type:	PANTHER Overrepresentation Test (Released 20190711)
		Annotation Version and Release Date:	PANTHER version 14.1 Released 2019-03-12												Annotation Version and Release Date:	PANTHER version 14.1 Released 2019-03-12
		Analyzed List:	Client Text Box Input (Homo sapiens)												Analyzed List:	Client Text Box Input (Homo sapiens)
		Reference List:	Homo sapiens (all genes in database)												Reference List:	Homo sapiens (all genes in database)
		Test Type:	FISHER												Test Type:	FISHER
		Correction:	FDR												Correction:	FDR
		PANTHER Pathways	Homo sapiens - REFLIST (20996)	Client Text Box Input (319)	Client Text Box Input (expected)	Client Text Box Input (over/under)	Client Text Box Input (fold Enrichment)	Client Text Box Input (raw P-value)	Client Text Box Input (FDR)						PANTHER Pathways	Homo sapiens - REFLIST (20996)	Client Text Box Input (566)	Client Text Box Input (expected)	Client Text Box Input (over/under)	Client Text Box Input (fold Enrichment)	Client Text Box Input (raw P-value)	Client Text Box Input (FDR)
		Glycolysis (P00024)	20	9	0.3	+	29.62	2.59e-10	1.42e-08						Glycolysis (P00024)	20	11	0.54	+	20.4	1.95e-10	1.06e-08
		Serine glycine biosynthesis (P02776)	5	2	0.08	+	26.33	0.00446	0.0407						Pentose phosphate pathway (P02762)	8	4	0.22	+	18.55	0.000197	0.00293
		Pentose phosphate pathway (P02762)	8	3	0.12	+	24.68	0.000501	0.00822						Adrenaline and noradrenaline biosynthesis (P00001)	29	7	0.78	+	8.95	3.56e-05	0.000731
		Axon guidance mediated by semaphorins (P00007)	24	4	0.36	+	10.97	0.000759	0.0104						Parkinson disease (P00049)	100	24	2.7	+	8.9	1.6e-14	1.31e-12
		FAS signaling pathway (P00020)	33	5	0.5	+	9.97	0.000244	0.00571						Dopamine receptor mediated signaling pathway (P05912)	57	13	1.54	+	8.46	2.96e-08	1.21e-06
		5-Hydroxytryptamine degredation (P04372)	20	3	0.3	+	9.87	0.00471	0.0407						Opioid prodynorphin pathway (P05916)	33	7	0.89	+	7.87	7.27e-05	0.00132
		Parkinson disease (P00049)	100	15	1.52	+	9.87	1.9e-10	1.56e-08						Opioid proopiomelanocortin pathway (P05917)	34	7	0.92	+	7.64	8.57e-05	0.00141
		Adrenaline and noradrenaline biosynthesis (P00001)	29	4	0.44	+	9.08	0.00143	0.0168						5-Hydroxytryptamine degredation (P04372)	20	4	0.54	+	7.42	0.00329	0.0216
		Opioid prodynorphin pathway (P05916)	33	4	0.5	+	7.98	0.0022	0.0241						Beta3 adrenergic receptor signaling pathway (P04379)	28	5	0.75	+	6.62	0.00158	0.0124
		Opioid proopiomelanocortin pathway (P05917)	34	4	0.52	+	7.74	0.00243	0.0249						Opioid proenkephalin pathway (P05915)	34	6	0.92	+	6.55	0.000572	0.00587
		Dopamine receptor mediated signaling pathway (P05912)	57	6	0.87	+	6.93	0.000356	0.00648						Nicotine pharmacodynamics pathway (P06587)	35	6	0.94	+	6.36	0.000656	0.00633
		Cytoskeletal regulation by Rho GTPase (P00016)	87	8	1.32	+	6.05	9.06e-05	0.00297						Axon guidance mediated by semaphorins (P00007)	24	4	0.65	+	6.18	0.00583	0.033
		5HT1 type receptor mediated signaling pathway (P04373)	46	4	0.7	+	5.72	0.0066	0.0515						Cortocotropin releasing factor receptor signaling pathway (P04380)	32	5	0.86	+	5.8	0.00267	0.0199
		Muscarinic acetylcholine receptor 2 and 4 signaling pathway (P00043)	63	5	0.96	+	5.22	0.00351	0.0339						5HT1 type receptor mediated signaling pathway (P04373)	46	7	1.24	+	5.64	0.000448	0.00612
		FGF signaling pathway (P00021)	120	9	1.82	+	4.94	0.000143	0.00392						Blood coagulation (P00011)	46	7	1.24	+	5.64	0.000448	0.00565
		Ras Pathway (P04393)	74	5	1.12	+	4.45	0.00665	0.0496						5HT4 type receptor mediated signaling pathway (P04376)	33	5	0.89	+	5.62	0.003	0.0214
		Integrin signalling pathway (P00034)	193	12	2.93	+	4.09	6.49e-05	0.00266						FAS signaling pathway (P00020)	33	5	0.89	+	5.62	0.003	0.0205
		Huntington disease (P00029)	147	9	2.23	+	4.03	0.000587	0.00875						Cytoskeletal regulation by Rho GTPase (P00016)	87	13	2.35	+	5.54	2.16e-06	7.08e-05
		EGF receptor signaling pathway (P00018)	134	8	2.04	+	3.93	0.00137	0.0172						Metabotropic glutamate receptor group II pathway (P00040)	47	7	1.27	+	5.52	0.000503	0.00589
		Gonadotropin-releasing hormone receptor pathway (P06664)	230	12	3.49	+	3.43	0.000307	0.00629						Enkephalin release (P05913)	36	5	0.97	+	5.15	0.00421	0.0265
		CCKR signaling map (P06959)	174	8	2.64	+	3.03	0.00625	0.0513						Angiotensin II-stimulated signaling through G proteins and beta-arrestin (P05911)	38	5	1.02	+	4.88	0.00518	0.0303
		Unclassified (UNCLASSIFIED)	18383	231	279.3	-	0.83	8.07e-13	1.32e-10						Muscarinic acetylcholine receptor 2 and 4 signaling pathway (P00043)	63	8	1.7	+	4.71	0.000534	0.00584
															Huntington disease (P00029)	147	16	3.96	+	4.04	6.5e-06	0.000152
															Oxytocin receptor mediated signaling pathway (P04391)	58	6	1.56	+	3.84	0.00659	0.036
															Thyrotropin-releasing hormone receptor signaling pathway (P04394)	60	6	1.62	+	3.71	0.00765	0.0392
															Integrin signalling pathway (P00034)	193	19	5.2	+	3.65	3.53e-06	9.64e-05
															FGF signaling pathway (P00021)	120	11	3.23	+	3.4	0.000687	0.00626
															CCKR signaling map (P06959)	174	13	4.69	+	2.77	0.00138	0.0113
															EGF receptor signaling pathway (P00018)	134	10	3.61	+	2.77	0.00478	0.029
															Gonadotropin-releasing hormone receptor pathway (P06664)	230	16	6.2	+	2.58	0.000836	0.00721
															Inflammation mediated by chemokine and cytokine signaling pathway (P00031)	260	15	7.01	+	2.14	0.00697	0.0369
															Unclassified (UNCLASSIFIED)	18383	416	495.56	-	0.84	7.17e-19	1.18e-16
